# Supplementary material
Source: publisher figshare collection journal article supplement (https://gsajournals.figshare.com/ndownloader/files/15362981)
Supplement: Supplementary file 1 [file 15362981]

## Sheet: Summary
		Table S3-1	Data from Figure 2 showing hierarchical clustering of 1411 differentially expressed genes (log2FC > 2, p-value < 0.0001).
		Table S3-2	Hierarchical clustering of differentially expressed genes with no threshold for LFC or p-value.

## Sheet: Table S3-1
gene_id	groups	X6_EP155mix	X7_p29mix	X8_p29stopmix	X9_dcl2mix	Mean	Var	proteinId.x	gotrm	goName	CPiprId	CP_iprDesc	CP_domainDesc	UP_proteinId	Protein.names.x	Gene.names.x	UP_iprID	UP_iprDesc	UP_KEGG	TrEMBL_proteinId	TrEM_ipr_pfamID	TrEM_iprDesc	NR_proteinId	RefR_proteinId	CP_BLAST_score	UP_BLAST_score	NR_BLAST_score	TrEMBL_BLAST_score	RefR_BLAST_score	Gene.ontology..biological.process.	Domain..FT.
gene5906	Cluster1	3.51954	3.21014	3.54213	3.53832	3.45253	0.0196579	346253	GO:0008800, GO:0030655, GO:0046677	beta-lactamase activity, beta-lactam antibiotic catabolic process, response to antibiotic	IPR001466, IPR012338	Beta-lactamase, Beta-lactamase-type transpeptidase fold	Beta-lactamase, beta-lactamase/transpeptidase-like	Q9Y7D1	Acyltransferase LovD (EC 2.3.1.238) (Lovastatin hydrolase) (Simvastatin synthase LovD) (SV synthase)	lovD	IPR001466, IPR012338	Beta-lactamase-related, Beta-lactamase/transpeptidase-like		M2YMF5	IPR001466, IPR012338	Beta-lactamase-related, Beta-lactamase/transpeptidase-like	XP_007930534.1		93.24	31.25	53.32	53.32
gene1706	Cluster1	3.5732	3.47131	3.55357	3.02172	3.40495	0.0504165	67132	GO:0008152, GO:0016491, GO:0004029	metabolic process, oxidoreductase activity, aldehyde dehydrogenase (D) activity	IPR015590, IPR016160, IPR016161	Aldehyde dehydrogenase, Aldehyde dehydrogenase, conserved site, Aldehyde/histidinol dehydrogenase	Aldedh, ALDEHYDE_DEHYDR_CYS, ALDEHYDE_DEHYDR_GLU, ALDH-like	Q9URW9	Putative aldehyde dehydrogenase-like protein C922.07c (EC 1.2.1.-)	SPAC922.07c	IPR015590, IPR016161, IPR016162, IPR016163, IPR029510	Aldehyde dehydrogenase domain, Aldehyde/histidinol dehydrogenase, Aldehyde dehydrogenase N-terminal domain, Aldehyde dehydrogenase, C-terminal, Aldehyde dehydrogenase, glutamic acid active site	spo:SPAC922.07c	R1EBH8	IPR015590, IPR016161, IPR016162, IPR016163, IPR029510	Aldehyde dehydrogenase domain, Aldehyde/histidinol dehydrogenase, Aldehyde dehydrogenase N-terminal domain, Aldehyde dehydrogenase, C-terminal, Aldehyde dehydrogenase, glutamic acid active site	XP_007587690.1		100	33.52	61.15	61.15
NOV_011733	Cluster1	3.85919	3.6571	2.8781	3.18482	3.3948	0.148882							Q7UXK9	Error-prone D polymerase (EC 2.7.7.7)	dnaE2 RB1262	IPR011708;IPR023073;IPR029460;IPR004013;IPR003141;IPR016195;IPR004805;				PF02811;					32.3				D repair [GO:0006281]; D replication [GO:0006260]
gene9987	Cluster1	3.34378	3.89591	3.68266	2.62178	3.38603	0.233455	342071	GO:0004497, GO:0005506, GO:0006118, GO:0020037, GO:0018585, GO:0018586, GO:0018587, GO:0018588, GO:0018589, GO:0018590, GO:0018591, GO:0018592, GO:0018593, GO:0018594, GO:0018595, GO:0018596, GO:0018597, GO:0018598, GO:0018599, GO:0018600, GO:0043823	monooxygenase activity, iron ion binding, electron transport, heme binding, fluorene oxygenase activity, mono-butyltin dioxygenase activity, limonene 8-monooxygenase activity, tri-n-butyltin dioxygenase activity, di-n-butyltin dioxygenase activity, methylsilanetriol hydroxylase activity, methyl tertiary butyl ether 3-monooxygenase activity, 4-nitrocatechol 4-monooxygenase activity, 4-chlorophenox…	IPR001128, IPR002401	Cytochrome P450, Cytochrome P450, E-class, group I	P450, EP450I, p450, Cytochrome P450	Q00714	Probable sterigmatocystin biosynthesis P450 monooxygenase stcS (EC 1.14.-.-) (Cytochrome P450 59)	stcS cyp59 cyp59A1 verB AN7808	IPR001128, IPR002401	Cytochrome P450, Cytochrome P450, E-class, group I	ani:AN7808.2	W3WIV8	IPR001128, IPR002401	Cytochrome P450, Cytochrome P450, E-class, group I	XP_007841573.1		100	36.07	45.48	45.48
gene10158	Cluster1	3.34491	3.99321	3.3298	2.7655	3.35836	0.188877	265481	GO:0005737, GO:0006629, GO:0016021, GO:0016627	cytoplasm, lipid metabolic process, integral to membrane, oxidoreductase activity, acting on the CH-CH group of donors	IPR010721, IPR001104	Protein of unknown function DUF1295, 3-oxo-5-alpha-steroid 4-dehydrogenase, C-terminal	DUF1295, S5A_REDUCTASE							T0KT59	IPR001104, IPR010721	3-oxo-5-alpha-steroid 4-dehydrogenase, C-terminal, Protein of unknown function DUF1295	EQB55294.1		100		67.83	67.83
gene4650	Cluster1	3.77481	3.3546	2.85134	3.37541	3.33904	0.107328	321284						P25611	Regulator of drug sensitivity 1	RDS1 YCR106W	IPR001138	Zn(2)-C6 fungal-type D-binding domain	sce:YCR106W	S3D7M4			XP_008078902.1		98.43	32.05	66.67	66.67
gene6066	Cluster1	3.27929	3.54584	3.76203	2.73626	3.33086	0.147081	37031	GO:0004672, GO:0005524, GO:0006468	protein kinase activity, ATP binding, protein amino acid phosphorylation	IPR000719, IPR017442, IPR011009	Protein kinase, core, Serine/threonine protein kinase-related, Protein kinase-like	O80778_ARATH_O80778;, Pkinase, PROTEIN_KISE_DOM, Protein kinase-like (PK-like)	P25333	Serine/threonine-protein kinase HAL4/SAT4 (EC 2.7.11.1) (Halotolerance protein 4)	SAT4 HAL4 YCR008W YCR046 YCR101 YCR8W	IPR000719, IPR002290, IPR008271, IPR011009, IPR017441	Protein kinase domain, Serine/threonine/dual specificity protein kinase, catalytic domain, Serine/threonine-protein kinase, active site, Protein kinase-like domain, Protein kinase, ATP binding site	sce:YCR008W	S3DX95	IPR000719, IPR011009	Protein kinase domain, Protein kinase-like domain	XP_008082409.1		100	40	48.43	48.43
gene11512	Cluster1	2.57738	4.08698	3.37563	3.14815	3.29703	0.292565	108349	GO:0008270, GO:0016491, GO:0003824, GO:0005488, GO:0008152	zinc ion binding, oxidoreductase activity, catalytic activity, binding, metabolic process	IPR013149, IPR013154, IPR002328, IPR011032, IPR016040	Alcohol dehydrogenase, zinc-binding, Alcohol dehydrogenase GroES-like, Alcohol dehydrogenase, zinc-containing, conserved site, GroES-like, D(P)-binding	ADH_zinc_N, ADH_N, ADH_ZINC, GroES-like, D(P)-binding Rossmann-fold domains	Q9P6I8	Zinc-type alcohol dehydrogenase-like protein C1198.01 (EC 1.-.-.-)	SPBC1198.01	IPR002085, IPR002328, IPR011032, IPR013149, IPR013154, IPR016040	Alcohol dehydrogenase superfamily, zinc-type, Alcohol dehydrogenase, zinc-type, conserved site, GroES-like, Alcohol dehydrogenase, C-terminal, Alcohol dehydrogenase, N-terminal, D(P)-binding domain	spo:SPBC1198.01	K3UYK9	IPR002085, IPR002328, IPR011032, IPR013154, IPR016040	Alcohol dehydrogenase superfamily, zinc-type, Alcohol dehydrogenase, zinc-type, conserved site, GroES-like, Alcohol dehydrogenase, N-terminal, D(P)-binding domain	XP_382608.1	XM_014083315.1	100	35.64	77.17	76.09	74.93
NOV_008454	Cluster1	3.49568	2.9573	3.3729	3.30219	3.28202	0.0399402							P27077, K3V5V6	Integrase (EC 2.7.7.-) (EC 3.1.-.-), Uncharacterized protein	int, FPSE_11317	IPR011010;IPR013762;IPR002104;IPR015094;IPR023109;IPR013087;,				PF10377;, PF10377;					32.3, 73.6				D recombination [GO:0006310]; establishment of integrated proviral latency [GO:0075713]; viral entry into host cell [GO:0046718],	,
gene11453	Cluster1	2.55428	3.93777	3.39595	3.23822	3.28155	0.243628	296384	GO:0005215, GO:0006810, GO:0016020, GO:0016021	transporter activity, transport, membrane, integral to membrane	IPR011701, IPR007114, IPR005829, IPR016196	Major facilitator superfamily MFS-1, Major facilitator superfamily, Sugar transporter, conserved site, MFS general substrate transporter	MFS_1, MFS, SUGAR_TRANSPORT_2, MFS general substrate transporter	Q9C101	Uncharacterized MFS-type transporter PB1E7.08c	SPAPB1E7.08c	IPR005828, IPR011701, IPR020846	Major facilitator, sugar transporter-like, Major facilitator superfamily, Major facilitator superfamily domain	spo:SPAPB1E7.08c	N4VC72	IPR005828, IPR005829, IPR020846	Major facilitator, sugar transporter-like, Sugar transporter, conserved site, Major facilitator superfamily domain	ENH78566.1	XM_007275385.1	100	39.68	83.7	83.7	75.07
gene5273	Cluster1	3.41811	3.21804	3.23673	3.16764	3.26013	0.00895775	70003		unknown_gene		unknown_gene			unknown_gene			unknown_gene		M4FL23		unknown_gene		XM_009229230.1	100			75.45	82.68
gene6109	Cluster1	3.22198	4.03282	3.29573	2.44203	3.24814	0.317121	355875	GO:0005351, GO:0008643, GO:0016020, GO:0005215, GO:0006810, GO:0016021, GO:0008733	sugar:hydrogen symporter activity, carbohydrate transport, membrane, transporter activity, transport, integral to membrane, L-arabinose isomerase activity	IPR003663, IPR005828, IPR007114, IPR005829, IPR016196	Sugar transporter, General substrate transporter, Major facilitator superfamily, Sugar transporter, conserved site, MFS general substrate transporter	SUGRTRNSPORT, Sugar_tr, SP: MFS transporter, sugar porter (SP) famil, MFS, SUGAR_TRANSPORT_1, SUGAR_TRANSPORT_2, MFS general substrate transporter	P49374	High-affinity glucose transporter	HGT1 KLLA0A11110g	IPR003663, IPR005828, IPR005829, IPR020846	Sugar/inositol transporter, Major facilitator, sugar transporter-like, Sugar transporter, conserved site, Major facilitator superfamily domain	kla:KLLA0A11110g	G4G0	IPR003663, IPR005828, IPR005829, IPR020846	Sugar/inositol transporter, Major facilitator, sugar transporter-like, Sugar transporter, conserved site, Major facilitator superfamily domain	XP_003717617.1	XM_014098292.1	100	45.56	77.1	77.1	73.39
gene6980	Cluster1	3.47482	3.48773	3.27145	2.73742	3.24286	0.0925141	330803						O84337	UvrABC system protein A (UvrA protein) (Excinuclease ABC subunit A)	uvrA CT_333	IPR003439, IPR004602, IPR013815, IPR027417	ABC transporter-like, UvrABC system subunit A, ATP-grasp fold, subdomain 1, P-loop containing nucleoside triphosphate hydrolase	ctr:CT_333	G2R5Z7	IPR000073, IPR029058	Alpha/beta hydrolase fold-1, Alpha/Beta hydrolase fold	XP_003654720.1		100	44.44	79.66	79.66
gene6071	Cluster1	2.89915	4.01825	3.39645	2.61789	3.23294	0.283286	60905	GO:0005215, GO:0006810, GO:0016021	transporter activity, transport, integral to membrane	IPR011701, IPR007114, IPR016196	Major facilitator superfamily MFS-1, Major facilitator superfamily, MFS general substrate transporter	MFS_1, MFS, MFS general substrate transporter	Q00357	Putative HC-toxin efflux carrier TOXA	TOXA	IPR011701, IPR020846	Major facilitator superfamily, Major facilitator superfamily domain		N4XHD6	IPR002938, IPR011701, IPR020846, IPR023753	FAD-binding domain, Major facilitator superfamily, Major facilitator superfamily domain, FAD/D(P)-binding domain	EMD93087.1		100	34.11	52.84	52.84
NOV_010543	Cluster1	3.00568	3.82088	3.83822	2.26537	3.23254	0.424968								unknown_gene	unknown_gene	unknown_gene				unknown_gene									unknown_gene
NOV_012519	Cluster1	3.81427	3.41999	2.50452	3.15793	3.22418	0.227211							Q9HFE6, M1WGT4	Uncharacterized R-binding protein P16F5.06, Uncharacterized protein	SPBP16F5.06, CPUR_08777	IPR012677;IPR000504;, IPR013103;									32.3, 77.8				ribosome biogenesis [GO:0042254],	DOMAIN 5 85 RRM. {ECO:0000255|PROSITE-ProRule:PRU00176}., DOMAIN 476 710 Reverse transcriptase Ty1/copia-type. {ECO:0000259|Pfam:PF07727}.
gene8492	Cluster1	3.3006	3.35683	2.74232	3.4595	3.21481	0.0776619	323413			IPR004360	Glyoxalase/bleomycin resistance protein/dioxygenase	Glyoxalase	Q8UC12	Cytochrome c biogenesis ATP-binding export protein CcmA (EC 3.6.3.41) (Heme exporter protein A)	ccmA Atu2686 AGR_C_4868	IPR003439, IPR003593, IPR005895, IPR017871, IPR027417	ABC transporter-like, AAA+ ATPase domain, ABC transporter, haem export, CcmA, ABC transporter, conserved site, P-loop containing nucleoside triphosphate hydrolase	atu:Atu2686	U1X358	IPR004360, IPR029068	Glyoxalase/fosfomycin resistance/dioxygenase domain, Glyoxalase/Bleomycin resistance protein/Dihydroxybiphenyl dioxygenase	WP_021621280.1			51.43	28.85	28.85
gene3969	Cluster1	3.2764	3.29124	2.93778	3.3507	3.21403	0.02621	327958		unknown_gene		unknown_gene			unknown_gene			unknown_gene				unknown_gene			100
NOV_009107	Cluster1	3.1598	3.31641	3.32832	3.03215	3.20917	0.0148672							A8M1N1, J3NK58	Acetaldehyde dehydrogenase 1 (EC 1.2.1.10) (Acetaldehyde dehydrogenase [acetylating] 1), Uncharacterized protein	Sare_3901, GGTG_01640 GGTG_01640	IPR003361;IPR015426;IPR016040;IPR000534;,				PF00069;, PF00431;PF00057;PF00629;PF01390;PF15494;PF00089;					37.7, 90.9				aromatic compound catabolic process [GO:0019439],	,
gene5599	Cluster1	3.01932	3.09287	2.97756	3.66155	3.18782	0.076509	234875						O35346	Focal adhesion kinase 1 (FADK 1) (EC 2.7.10.2) (Focal adhesion kinase-related nonkinase) (FRNK) (Protein-tyrosine kinase 2) (p125FAK) (pp125FAK)	Ptk2 Fak Fak1	IPR000299, IPR000719, IPR001245, IPR005189, IPR008266, IPR011009, IPR011993, IPR017441, IPR019748, IPR019749, IPR020635, IPR029071	FERM domain, Protein kinase domain, Serine-threonine/tyrosine-protein kinase catalytic domain, Focal adhesion kinase, targeting (FAT) domain, Tyrosine-protein kinase, active site, Protein kinase-like domain, PH domain-like, Protein kinase, ATP binding site, FERM central domain, Band 4.1 domain, Tyrosine-protein kinase, catalytic domain, Ubiquitin-related domain	rno:25614	T5A6L5			EQK97396.1		100	30.91	48	48
gene10014	Cluster1	3.37922	3.48151	3.21705	2.67015	3.18698	0.0979298	216239	GO:0006885, GO:0015299, GO:0016021	regulation of pH, solute:hydrogen antiporter activity, integral to membrane	IPR006153	Sodium/hydrogen exchanger	Na_H_Exchanger	Q9P7I1	K(+)/H(+) antiporter 1	kha1 SPAC105.01c	IPR006153	Cation/H+ exchanger	spo:SPAC105.01c	B2ARN5	IPR006153	Cation/H+ exchanger	XP_001906147.1	XM_009218071.1	100	54.01	81.82	81.82	76.07
gene2713	Cluster1	3.77084	3.54071	3.16164	2.24758	3.18019	0.337237	71399		unknown_gene		unknown_gene			unknown_gene			unknown_gene				unknown_gene			100
gene11000	Cluster1	2.62726	3.4192	3.7663	2.89993	3.17817	0.196228	334388		unknown_gene		unknown_gene			unknown_gene			unknown_gene		H1V0C4		unknown_gene	CCF33675.1		100		48.65	48.65
NOV_000005	Cluster1	3.38007	3.25412	3.62372	2.43904	3.17423	0.197823							B2DBF1, M7TXT6	Copalyl diphosphate synthase (EC 5.5.1.12), Putative ent-kaurene synthase protein	PaDC2, BcDW1_5320	IPR017057;IPR008930;, IPR017057;IPR008930;				PF14830;PF00264;					87.4, 175				,	,
gene9869	Cluster1	2.47926	3.32073	3.25433	3.61466	3.16724	0.176163	352900						O83441	V-type ATP synthase alpha chain 1 (EC 3.6.3.14) (V-ATPase subunit A 1)	atpA1 TP_0426	IPR000194, IPR000793, IPR004100, IPR020003, IPR022878, IPR027417, IPR031686	ATPase, F1/V1/A1 complex, alpha/beta subunit, nucleotide-binding domain, ATPase, F1/V1/A1 complex, alpha/beta subunit, C-terminal, ATPase, F1 complex alpha/beta subunit, N-terminal domain, ATPase, alpha/beta subunit, nucleotide-binding domain, active site, V-type ATP synthase catalytic alpha chain, P-loop containing nucleoside triphosphate hydrolase, ATPsynthase alpha/beta subunit, N-terminal ext…	tpa:TP_0426	R8BFY0			XP_007916995.1		100	34.09	37.12	37.12
NOV_009459	Cluster1	3.69505	3.45004	3.07236	2.43951	3.16424	0.224279							K9E465	Uncharacterized protein	HMPREF9447_01653					PF07652;PF01543;PF01542;PF01539;PF01560;PF01538;PF01006;PF01001;PF01506;PF08300;PF08301;PF12941;PF02907;PF00998;,					35.8
gene6244	Cluster1	2.86576	3.36598	2.84226	3.56606	3.16002	0.0987122	232730			IPR008547	Protein of unknown function DUF829, eukaryotic	DUF829	Q2TBP5	Transmembrane protein 53	TMEM53	IPR008547, IPR029058	Protein of unknown function DUF829, TMEM53, Alpha/Beta hydrolase fold	bta:540738	R8BLQ4	IPR008547	Protein of unknown function DUF829, TMEM53	XP_007914973.1		85.41	26.92	37.2	37.2
gene4907	Cluster1	2.55177	3.8312	3.35107	2.84568	3.14493	0.238713	251842						B1WVR2	Chaperone protein DnaJ	dnaJ cce_1299	IPR001305, IPR001623, IPR002939, IPR008971, IPR012724	Heat shock protein DnaJ, cysteine-rich domain, DnaJ domain, Chaperone DnaJ, C-terminal, HSP40/DnaJ peptide-binding, Chaperone DnaJ	cyt:cce_1299	W3WP95			XP_007839345.1		100	33.33	90	90
NOV_013553	Cluster1	2.82254	3.4441	3.062	3.25016	3.1447	0.0528469							A0A085LFI2	Putative 3-methyladenine D glycosylase (EC 3.2.2.-)	IU11_10090	IPR011034;IPR003180;				unknown_gene					39.7				base-excision repair [GO:0006284]
gene10198	Cluster1	3.33908	3.51429	1.92194	3.73107	3.12659	0.50301	295293	GO:0016787	hydrolase activity	IPR001279	Beta-lactamase-like	Lactamase_B							S3DHW6	IPR001279	Metallo-beta-lactamase	XP_008081360.1	XM_001227490.1	100		60	60	89.11
gene5173	Cluster1	2.87118	3.34253	2.99168	3.27808	3.12087	0.0382196	321680	GO:0003824, GO:0005488, GO:0008152	catalytic activity, binding, metabolic process	IPR013154, IPR011032, IPR016040	Alcohol dehydrogenase GroES-like, GroES-like, D(P)-binding	ADH_N, GroES-like, D(P)-binding Rossmann-fold domains							K2SUM2	IPR002085, IPR011032, IPR016040	Alcohol dehydrogenase superfamily, zinc-type, GroES-like, D(P)-binding domain	EKG20385.1		100		68.12	68.12
gene3973	Cluster1	2.47142	3.61256	3.66816	2.71339	3.11638	0.282257	69030						Q7RZQ3	Protein VTS1	vts1 NCU00311	IPR001660, IPR013761	Sterile alpha motif domain, Sterile alpha motif/pointed domain	ncr:NCU00311	R8BWW2			XP_007911480.1	XM_014884988.1	100	51.85	45.63	45.63	100
gene9876	Cluster1	2.83709	3.84065	3.56604	2.21184	3.11391	0.405731	45394	GO:0006865, GO:0015171, GO:0016020, GO:0006810	amino acid transport, amino acid transmembrane transporter activity, membrane, transport	IPR004841, IPR002293	Amino acid permease-associated region, Amino acid/polyamine transporter I	AA_permease, Amino acid transporter	P19807	Choline transport protein	HNM1 CTR CTR1 YGL077C	IPR002293, IPR004756, IPR004840	Amino acid/polyamine transporter I, Amino acid permease subfamily, Amino acid permease, conserved site	sce:YGL077C	L2FFB5	IPR002293	Amino acid/polyamine transporter I	XP_007286188.1		95.11	28.05	67.57	67.57
gene3873	Cluster1	3.70603	3.18985	2.95697	2.59568	3.11213	0.162386	252545						Q9K6Y0	UvrABC system protein A (UvrA protein) (Excinuclease ABC subunit A)	uvrA BH3594	IPR003439, IPR003593, IPR004602, IPR013815, IPR017871, IPR027417	ABC transporter-like, AAA+ ATPase domain, UvrABC system subunit A, ATP-grasp fold, subdomain 1, ABC transporter, conserved site, P-loop containing nucleoside triphosphate hydrolase	bha:BH3594	A0A094GN00	IPR000073, IPR029058	Alpha/beta hydrolase fold-1, Alpha/Beta hydrolase fold	KFZ04267.1		100	29.63	46.94	46.94
gene6085	Cluster1	3.19359	3.6407	3.52761	2.07404	3.10899	0.384058	257103	GO:0016491	oxidoreductase activity	IPR001395	Aldo/keto reductase	D(P)-linked oxidoreductase							Q2GWL7	IPR003480, IPR023213	Transferase, Chloramphenicol acetyltransferase-like domain	XP_001225293.1		100		51.68	51.68
gene8800	Cluster1	3.03024	3.28386	3.33937	2.76204	3.10388	0.0525313	108648		unknown_gene		unknown_gene			unknown_gene			unknown_gene		S3BPN4		unknown_gene	EPE02347.1		100		52.8	52.8
NOV_003722	Cluster1	3.06747	2.89331	3.26446	3.1897	3.10373	0.0197042								unknown_gene	unknown_gene	unknown_gene				PF02515;, PF02515;									unknown_gene
NOV_011293	Cluster1	2.94102	3.30438	3.06354	3.09308	3.10051	0.0171056							P0CJ81, R8BSS5	Proline-rich P65 protein, Uncharacterized protein	p65 MPN_309 MP527, UCRPA7_2140	,				PF00149;, PF00149;					37.4, 297				,	,
gene10396	Cluster1	2.27145	3.65156	3.58317	2.871	3.0943	0.319123	342654			IPR002035	von Willebrand factor, type A	VWFADOMAIN, VWA, no description, VWFA	Q9GLY5	Inter-alpha-trypsin inhibitor heavy chain H3 (ITI heavy chain H3) (ITI-HC3) (Inter-alpha-inhibitor heavy chain 3)	ITIH3	IPR002035, IPR010600, IPR013694	von Willebrand factor, type A, Inter-alpha-trypsin inhibitor heavy chain, C-terminal, VIT domain	ocu:100008624	L2GFX9	IPR002035, IPR028992, IPR032838	von Willebrand factor, type A, Hedgehog/Intein (Hint) domain, VWA-Hint protein, Vwaint domain	XP_007273772.1	XM_007739187.1	100	27.91	53.09	53.09	80.71
gene5421	Cluster1	3.22773	3.32914	3.30882	2.50168	3.09184	0.117537	257654	GO:0004497, GO:0005506, GO:0006118, GO:0020037, GO:0018585, GO:0018586, GO:0018587, GO:0018588, GO:0018589, GO:0018590, GO:0018591, GO:0018592, GO:0018593, GO:0018594, GO:0018595, GO:0018596, GO:0018597, GO:0018598, GO:0018599, GO:0018600, GO:0043823	monooxygenase activity, iron ion binding, electron transport, heme binding, fluorene oxygenase activity, mono-butyltin dioxygenase activity, limonene 8-monooxygenase activity, tri-n-butyltin dioxygenase activity, di-n-butyltin dioxygenase activity, methylsilanetriol hydroxylase activity, methyl tertiary butyl ether 3-monooxygenase activity, 4-nitrocatechol 4-monooxygenase activity, 4-chlorophenox…	IPR001128, IPR002401	Cytochrome P450, Cytochrome P450, E-class, group I	P450, EP450I, p450, CYTOCHROME_P450, Cytochrome P450	H1A988	11-oxo-beta-amyrin 30-oxidase (EC 1.14.13.173) (Cytochrome P450 72A154)	CYP72A154	IPR001128, IPR002401, IPR017972	Cytochrome P450, Cytochrome P450, E-class, group I, Cytochrome P450, conserved site		W3WRZ4	IPR001128, IPR002401, IPR017972	Cytochrome P450, Cytochrome P450, E-class, group I, Cytochrome P450, conserved site	XP_007839638.1		90.79	24.04	65.3	65.3
gene6332	Cluster1	2.77635	3.47253	3.0717	3.02963	3.08755	0.0621637	38511	GO:0003824, GO:0006725, GO:0008199, GO:0005506, GO:0016702	catalytic activity, aromatic compound metabolic process, ferric iron binding, iron ion binding, oxidoreductase activity, acting on single donors with incorporation of molecular oxygen, incorporation of two atoms of oxygen	IPR000627, IPR015889	Intradiol ring-cleavage dioxygenase, C-terminal, Intradiol ring-cleavage dioxygenase, core	Dioxygenase_C, Aromatic compound dioxygenase	Q12V70	R 3'-terminal phosphate cyclase (R cyclase) (R-3'-phosphate cyclase) (EC 6.5.1.4)	rtcA Mbur_1766	IPR000228, IPR013791, IPR013792, IPR017770, IPR020719, IPR023797	R 3'-terminal phosphate cyclase, R 3'-terminal phosphate cyclase, insert domain, R 3'-terminal phosphate cyclase/enolpyruvate transferase, alpha/beta, R 3'-terminal phosphate cyclase type 1, R 3'-terminal phosphate cyclase-like, conserved site, R 3'-terminal phosphate cyclase domain	mbu:Mbur_1766	R8BNK8	IPR000627, IPR015889	Intradiol ring-cleavage dioxygenase, C-terminal, Intradiol ring-cleavage dioxygenase, core	XP_007914279.1		100	31.25	72.02	72.02
gene9122	Cluster1	2.86301	3.1783	2.99494	3.26991	3.07654	0.0250002	357363		unknown_gene		unknown_gene			unknown_gene			unknown_gene				unknown_gene			100
gene10833	Cluster1	2.78639	3.31132	2.71376	3.48096	3.07311	0.108606	72943						Q9UST3	Vacuolar protein sorting-associated protein 52	vps52 SPBC336.11	IPR007258	Vps52	spo:SPBC336.11	S3CUX5			EPE10523.1		100	35.94	29.32	29.32
gene9384	Cluster1	3.62793	3.06945	2.86023	2.71339	3.06775	0.120609	72691						B3ELU5	Undecaprenyl-diphosphatase (EC 3.6.1.27) (Bacitracin resistance protein) (Undecaprenyl pyrophosphate phosphatase)	uppP Cphamn1_1869	IPR003824	Undecaprenyl-diphosphatase UppP	cpb:Cphamn1_1869	M7SFY3			XP_007797837.1		78.34	26.92	36.78	36.78
gene2906	Cluster1	3.03347	3.14935	2.93591	3.12622	3.06124	0.00711626	337118	GO:0006118, GO:0004499, GO:0050660, GO:0050661, GO:0016491, GO:0005792, GO:0031227, GO:0003824, GO:0005488, GO:0008152	electron transport, flavin-containing monooxygenase activity, FAD binding, DP binding, oxidoreductase activity, microsome, intrinsic to endoplasmic reticulum membrane, catalytic activity, binding, metabolic process	IPR001327, IPR000960, IPR000759, IPR013027, IPR012143, IPR016040	Pyridine nucleotide-disulphide oxidoreductase, D-binding region, Flavin-containing monooxygenase FMO, Adrenodoxin reductase, FAD-dependent pyridine nucleotide-disulphide oxidoreductase, Dimethylaniline monooxygenase, N-oxide-forming, D(P)-binding	Q9LLN1_ORYSA_Q9LLN1;, FMOXYGESE, ADXRDTASE, Pyr_redox_2, Dimethylaniline monooxygenase (N-oxide-forming), D(P)-binding Rossmann-fold domains	P49326	Dimethylaniline monooxygenase [N-oxide-forming] 5 (EC 1.14.13.8) (Dimethylaniline oxidase 5) (Hepatic flavin-containing monooxygenase 5) (FMO 5)	FMO5	IPR000960, IPR002257, IPR012143, IPR016040, IPR020946, IPR023753	Flavin monooxygenase FMO, Flavin monooxygenase (FMO) 5, Dimethylaniline monooxygenase, N-oxide-forming, D(P)-binding domain, Flavin monooxygenase-like, FAD/D(P)-binding domain	hsa:2330	R8BJ47	IPR000960, IPR012143, IPR020946, IPR023753	Flavin monooxygenase FMO, Dimethylaniline monooxygenase, N-oxide-forming, Flavin monooxygenase-like, FAD/D(P)-binding domain	XP_007915995.1		100	32.26	56	56
gene6126	Cluster1	4.55431	1.7579	3.13093	2.78861	3.05794	1.00177	67819												H6C6I3	IPR025442	Domain of unknown function DUF4185	XP_009159790.1		100		26.67	26.67
gene6818	Cluster1	3.34385	3.08337	2.57524	3.19395	3.0491	0.0833944	229666	GO:0005215, GO:0006810, GO:0016021	transporter activity, transport, integral to membrane	IPR005828, IPR007114, IPR016196	General substrate transporter, Major facilitator superfamily, MFS general substrate transporter	Sugar_tr, MFS, MFS general substrate transporter	P53048	General alpha-glucoside permease (Maltose permease MAL11) (Maltose transport protein MAL11)	MAL11 AGT1 MAL1T MTP1 YGR289C	IPR003663, IPR005828, IPR020846	Sugar/inositol transporter, Major facilitator, sugar transporter-like, Major facilitator superfamily domain	sce:YGR289C	C7ZM55	IPR003663, IPR005828, IPR005829, IPR020846	Sugar/inositol transporter, Major facilitator, sugar transporter-like, Sugar transporter, conserved site, Major facilitator superfamily domain	XP_003040621.1		82.59	35.56	29.24	29.24
NOV_003905	Cluster1	3.71116	3.55826	2.84181	2.06847	3.04492	0.425529							Q54EN4, A2R016	Protein disulfide-isomerase 2 (PDI2) (EC 5.3.4.1), Aspergillus niger contig An12c0220, genomic contig	pdi2 DDB_G0291434, An12g07000	IPR005788;IPR005792;IPR012336;IPR017937;IPR013766;, IPR009057;IPR012337;				PF00464;,					35, 203				cell redox homeostasis [GO:0045454]; protein folding [GO:0006457]; response to bacterium [GO:0009617]; response to endoplasmic reticulum stress [GO:0034976]; sexual reproduction [GO:0019953],	DOMAIN 21 147 Thioredoxin 1. {ECO:0000255|PROSITE-ProRule:PRU00691}.; DOMAIN 355 486 Thioredoxin 2. {ECO:0000255|PROSITE-ProRule:PRU00691}.,
gene6544	Cluster1	3.30955	3.61964	3.17201	2.06505	3.04156	0.344143	330016						A0PQ00	Polyphosphate kinase (EC 2.7.4.1) (ATP-polyphosphate phosphotransferase) (Polyphosphoric acid kinase)	ppk MUL_1972	IPR003414, IPR024953, IPR025198, IPR025200	Polyphosphate kinase, Polyphosphate kinase middle domain, Polyphosphate kinase N-terminal domain, Polyphosphate kinase C-terminal domain	mul:MUL_1972	B9CN51			WP_003149782.1		100	31.87	42.86	42.86
gene4219	Cluster1	2.24929	3.27406	2.61194	3.99098	3.03157	0.441829	69482	GO:0004194, GO:0006508, GO:0004190	pepsin A activity, proteolysis, aspartic-type endopeptidase activity	IPR001461, IPR009007	Peptidase A1, Peptidase aspartic, catalytic	PEPSIN, Asp, Acid proteases	Q9GMY8	Pepsin A (EC 3.4.23.1)	PGA PG	IPR001461, IPR001969, IPR012848, IPR021109	Aspartic peptidase, Aspartic peptidase, active site, Aspartic peptidase, N-terminal, Aspartic peptidase domain		W3WYR3	IPR001461, IPR021109	Aspartic peptidase, Aspartic peptidase domain	XP_007835643.1		100	25.21	35.23	35.23
gene6263	Cluster1	3.22862	2.91395	2.84873	3.08867	3.01999	0.0222043	329546						O16116	Glutathione S-transferase 3 (EC 2.5.1.18) (CeGST3) (GST class-sigma)	gst-3 K08F4.11	IPR004045, IPR004046, IPR010987, IPR012336	Glutathione S-transferase, N-terminal, Glutathione S-transferase, C-terminal, Glutathione S-transferase, C-terminal-like, Thioredoxin-like fold	cel:CELE_K08F4.11	A0A010RLJ5			XP_007603410.1		100	48.57	36.42	36.42
gene8542	Cluster1	2.80136	3.34488	3.03803	2.8883	3.01814	0.0427506	346975	GO:0008152, GO:0016491, GO:0003824, GO:0005488	metabolic process, oxidoreductase activity, catalytic activity, binding	IPR002347, IPR002198, IPR016040	Glucose/ribitol dehydrogenase, Short-chain dehydrogenase/reductase SDR, D(P)-binding	GDHRDH, adh_short, D(P)-binding Rossmann-fold domains	O74959	Uncharacterized oxidoreductase C736.13 (EC 1.-.-.-)	SPCC736.13	IPR002198, IPR002347, IPR016040	Short-chain dehydrogenase/reductase SDR, Glucose/ribitol dehydrogenase, D(P)-binding domain	spo:SPCC736.13	M7TE99	IPR002198, IPR002347, IPR016040	Short-chain dehydrogenase/reductase SDR, Glucose/ribitol dehydrogenase, D(P)-binding domain	XP_007795898.1		100	31.9	62.89	62.89
NOV_012656	Cluster1	3.39997	1.35066	5.14311	2.10938	3.00078	2.0666							Q6Z2T8	Soluble starch synthase 2-2, chloroplastic/amyloplastic (EC 2.4.1.21) (Soluble starch synthase II-2)	SSII-2 SS2 Os02g0744700 LOC_Os02g51070 OJ1118_G04.8 OJ1734_E02.35	IPR001296;IPR011835;IPR013534;				PF06968;PF04055;					33.9				starch biosynthetic process [GO:0019252]
gene2783	Cluster1	3.32612	3.84019	1.86134	2.97491	3.00064	0.527361	71501						O70237	Zinc finger protein Gfi-1b (Growth factor independent protein 1B)	Gfi1b	IPR007087, IPR013087, IPR015880, IPR029840	Zinc finger, C2H2, Zinc finger C2H2-type/integrase D-binding domain, Zinc finger, C2H2-like, Zinc finger protein Gfi-1/1b		R8BDJ9			XP_007917854.1		98.56	37.7	58.96	58.96
NOV_002417	Cluster1	3.39997	2.32804	2.66478	3.58905	2.99546	0.267693							Q766Z3, E5BGG1	D polymerase zeta catalytic subunit (EC 2.7.7.7) (Protein reversionless 3-like) (AtREV3), Putative D+ dependent deacetylase	REV3 At1g67500 F12B7.5 T1F15.3, FSBG_01081	IPR006172;IPR017964;IPR006133;IPR006134;IPR023211;IPR030559;IPR012337;IPR025687;, IPR029035;IPR003000;IPR026591;IPR026590;									33.9, 39.7				cellular response to D damage stimulus [GO:0006974]; cellular response to UV-C [GO:0071494]; D replication [GO:0006260]; error-prone translesion synthesis [GO:0042276],	, DOMAIN 5 237 Deacetylase sirtuin-type. {ECO:0000259|PROSITE:PS50305}.
gene7090	Cluster1	2.77748	3.02002	3.47047	2.71181	2.99495	0.0885517	70807	GO:0004553, GO:0005576, GO:0005975, GO:0030248, GO:0006629, GO:0016788	hydrolase activity, hydrolyzing O-glycosyl compounds, extracellular region, carbohydrate metabolic process, cellulose binding, lipid metabolic process, hydrolase activity, acting on ester bonds	IPR001087, IPR000254, IPR013830	Lipase, GDSL, Cellulose-binding region, fungal, Esterase, SGNH hydrolase-type	Lipase_GDSL, CBM_1, SGNH hydrolase, Cellulose-binding domain	P49075	Exoglucanase 3 (EC 3.2.1.91) (1,4-beta-cellobiohydrolase 3) (Exocellobiohydrolase 3)	cel3	IPR000254, IPR001524, IPR016288	Cellulose-binding domain, fungal, Glycoside hydrolase, family 6, conserved site, 1, 4-beta cellobiohydrolase		G2YYD8	IPR000254, IPR013830	Cellulose-binding domain, fungal, SGNH hydrolase-type esterase domain	CCD56636.1		100	53.33	61.17	61.17
gene7170	Cluster1	2.87855	3.28372	3.30327	2.48196	2.98688	0.113724	331144	GO:0004402	histone acetyltransferase activity										L7I8M7			XP_003718506.1	XM_004992544.1	100		49.18	49.18	90.57
gene4349	Cluster1	2.73832	3.17493	2.97662	3.03673	2.98165	0.0249073	14684						Q9Y219	Protein jagged-2 (Jagged2) (hJ2)	JAG2	IPR000152, IPR000742, IPR001007, IPR001774, IPR001881, IPR009030, IPR011651, IPR013032, IPR018097, IPR026219	EGF-type aspartate/asparagine hydroxylation site, EGF-like domain, VWFC domain, Delta/Serrate/lag-2 (DSL) protein, EGF-like calcium-binding domain, Growth factor receptor cysteine-rich domain, Notch ligand, N-terminal domain, EGF-like, conserved site, EGF-like calcium-binding, conserved site, Jagged/Serrate protein	hsa:3714	R8BUQ2			XP_007912141.1	XM_003665885.1	92.82	31.91	41.61	41.61	85.48
gene8608	Cluster1	2.89738	3.17703	2.22647	3.6052	2.97652	0.251073	262270	GO:0008152, GO:0016491, GO:0003824, GO:0005488, GO:0000140	metabolic process, oxidoreductase activity, catalytic activity, binding, acylglycerone-phosphate reductase activity	IPR002198, IPR002347, IPR016040	Short-chain dehydrogenase/reductase SDR, Glucose/ribitol dehydrogenase, D(P)-binding	SDRFAMILY, GDHRDH, adh_short, ADH_SHORT, D(P)-binding Rossmann-fold domains	Q09851	DPH-dependent 1-acyldihydroxyacetone phosphate reductase (ADR) (EC 1.1.1.101) (1-acyl DHAP reductase) (Acyl/alkyl DHAP reductase) (Acylglycerone-phosphate reductase)	ayr1 SPAC23D3.11	IPR002198, IPR002347, IPR016040, IPR020904	Short-chain dehydrogenase/reductase SDR, Glucose/ribitol dehydrogenase, D(P)-binding domain, Short-chain dehydrogenase/reductase, conserved site	spo:SPAC23D3.11	R8BVB5	IPR002198, IPR002347, IPR016040, IPR020904	Short-chain dehydrogenase/reductase SDR, Glucose/ribitol dehydrogenase, D(P)-binding domain, Short-chain dehydrogenase/reductase, conserved site	XP_007911994.1		100	34.43	53.29	53.29
gene7423	Cluster1	2.35507	2.67665	4.31269	2.52554	2.96749	0.616131	71314	GO:0004289, GO:0006508, GO:0008236, GO:0019131	subtilase activity, proteolysis, serine-type peptidase activity, tripeptidyl-peptidase I activity	IPR000209, IPR015366, IPR009020	Peptidase S8 and S53, subtilisin, kexin, sedolisin, Peptidase S53, propeptide, Proteinase inhibitor, propeptide	Peptidase_S8, Pro-kuma_activ, SUBTILASE_SER, Subtilisin-like, Protease propeptides/inhibitors	Q70J59	Tripeptidyl-peptidase sed2 (EC 3.4.14.-) (Sedolisin-B)	sed2 sedB AFUA_4G03490	IPR000209, IPR009020, IPR015366, IPR030400	Peptidase S8/S53 domain, Proteinase inhibitor, propeptide, Peptidase S53, propeptide, Sedolisin domain	afm:AFUA_4G03490	M7SXF5	IPR000209, IPR009020, IPR015366, IPR015500, IPR023828, IPR030400	Peptidase S8/S53 domain, Proteinase inhibitor, propeptide, Peptidase S53, propeptide, Peptidase S8, subtilisin-related, Peptidase S8, subtilisin, Ser-active site, Sedolisin domain	XP_007791693.1	XM_659671.1	93.81	53.52	67.03	67.03	100
gene8675	Cluster1	2.86022	2.98293	2.28666	3.68345	2.95331	0.246767	331814	GO:0004672, GO:0005524, GO:0006468, GO:0004674	protein kinase activity, ATP binding, protein amino acid phosphorylation, protein serine/threonine kinase activity	IPR000719, IPR017442, IPR002290, IPR017441, IPR011009	Protein kinase, core, Serine/threonine protein kinase-related, Serine/threonine protein kinase, Protein kinase ATP binding, conserved site, Protein kinase-like	Q6UPR5_CHLRE_Q6UPR5;, Pkinase, no description, PROTEIN_KISE_ATP, Protein kinase-like (PK-like)							B2AFK8	IPR011009	Protein kinase-like domain	XP_001904447.1		100		38.33	38.33
gene1062	Cluster1	3.54778	2.65571	2.88422	2.71923	2.95173	0.125379	248835	GO:0004497, GO:0006118, GO:0006725, GO:0008152, GO:0016491	monooxygenase activity, electron transport, aromatic compound metabolic process, metabolic process, oxidoreductase activity	IPR003042, IPR002938	Aromatic-ring hydroxylase, Monooxygenase, FAD-binding	RNGMNOXGSE, FAD_binding_3	B6D1N4	FAD-dependent urate hydroxylase (EC 1.14.13.113)	hpxO	IPR002938, IPR023753	FAD-binding domain, FAD/D(P)-binding domain		A0A024S2T9	IPR002938, IPR023753	FAD-binding domain, FAD/D(P)-binding domain	XP_006967130.1		100	29.51	63.16	63.16
gene9995	Cluster1	2.74301	3.14625	2.94538	2.95642	2.94777	0.0203503	75931	GO:0004672, GO:0005524, GO:0006468	protein kinase activity, ATP binding, protein amino acid phosphorylation	IPR000719, IPR011009	Protein kinase, core, Protein kinase-like	Q7R1M1_EEEEE_Q7R1M1;, PROTEIN_KISE_DOM, Protein kinase-like (PK-like)	O35942	Serine/threonine-protein kinase Nek2 (EC 2.7.11.1) (Never in mitosis A-related kinase 2) (NimA-related protein kinase 2)	Nek2	IPR000719, IPR002290, IPR008271, IPR011009	Protein kinase domain, Serine/threonine/dual specificity protein kinase, catalytic domain, Serine/threonine-protein kinase, active site, Protein kinase-like domain	mmu:18005	R8BKJ5	IPR000719, IPR011009	Protein kinase domain, Protein kinase-like domain	XP_007915355.1		100	24.14	41.73	41.73
NOV_002380	Cluster1	2.82886	3.29833	1.72557	3.93277	2.94638	0.650259							P10978, I1FA01	Retrovirus-related Pol polyprotein from transposon TNT 1-94 [Includes: Protease (EC 3.4.23.-); Reverse transcriptase (EC 2.7.7.49); Endonuclease], Uncharacterized protein	,	IPR025724;IPR001584;IPR012337;IPR013103;IPR001878;,				PF02401;					110, 133				D integration [GO:0015074],	DOMAIN 473 642 Integrase catalytic. {ECO:0000255|PROSITE-ProRule:PRU00457}.,
NOV_004512	Cluster1	3.30403	3.64136	2.99347	1.84153	2.9451	0.458453							P45968, G4N5W0	Chromo domain-containing protein cec-3, Uncharacterized protein	cec-3 T09A5.8, MGG_17035	IPR000953;IPR023780;IPR016197;IPR023779;,				PF00390;PF03949;,					46.2, 118				negative regulation of gene expression [GO:0010629],	DOMAIN 24 84 Chromo. {ECO:0000255|PROSITE-ProRule:PRU00053}.,
gene10202	Cluster1	2.4417	2.60115	3.6216	3.10115	2.9414	0.213416	333693						Q9W4I5	Protein Flattop homolog (Cilia- and flagella-associated protein 126)	CG3062			dme:Dmel_CG3062	J4G0X8	IPR027450, IPR032870	Alpha-ketoglutarate-dependent dioxygenase AlkB-like, Alpha-ketoglutarate-dependent dioxygenase alkB homologue 7	CCL99328.1		100	31.75	38.33	38.33
gene9477	Cluster1	2.83921	2.44381	2.81885	3.62661	2.93212	0.185558	264272	GO:0006118, GO:0016491, GO:0050660, GO:0003824	electron transport, oxidoreductase activity, FAD binding, catalytic activity	IPR006094, IPR012951, IPR006093, IPR016166	FAD linked oxidase, N-terminal, Berberine/berberine-like, Oxygen oxidoreductase covalent FAD-binding site, FAD-binding, type 2	FAD_binding_4, BBE, OX2_COVAL_FAD, FAD-binding domain	P30986	Reticuline oxidase (EC 1.21.3.3) (Berberine bridge-forming enzyme) (BBE) (Tetrahydroprotoberberine synthase)	BBE1	IPR006093, IPR006094, IPR012951, IPR016166, IPR016167, IPR016169	Oxygen oxidoreductase covalent FAD-binding site, FAD linked oxidase, N-terminal, Berberine/berberine-like, FAD-binding, type 2, FAD-binding, type 2, subdomain 1, CO dehydrogenase flavoprotein-like, FAD-binding, subdomain 2	ag:AAC39358	R8BKA5	IPR006093, IPR006094, IPR012951, IPR016166, IPR016167, IPR016169	Oxygen oxidoreductase covalent FAD-binding site, FAD linked oxidase, N-terminal, Berberine/berberine-like, FAD-binding, type 2, FAD-binding, type 2, subdomain 1, CO dehydrogenase flavoprotein-like, FAD-binding, subdomain 2	XP_007915519.1		100	39.47	65.12	65.12
gene1093	Cluster1	2.56662	3.43706	2.25341	3.40496	2.91551	0.26792	354037		unknown_gene		unknown_gene			unknown_gene			unknown_gene		K2R483		unknown_gene	EKG08993.1		100		42.86	42.86
gene2507	Cluster1	2.73881	2.70656	1.8444	4.33984	2.9074	0.812654	343529	GO:0004497, GO:0005506, GO:0006118, GO:0020037	monooxygenase activity, iron ion binding, electron transport, heme binding	IPR002401, IPR001128	Cytochrome P450, E-class, group I, Cytochrome P450	EP450I, p450, CYTOCHROME_P450, Cytochrome P450	Q9Y7C8	Dihydromonacolin L monooxygenase LovA (EC 1.14.13.197) (EC 1.14.13.198) (Dihydromonacolin L hydroxylase) (Monacolin L hydroxylase)	lovA	IPR001128, IPR002401	Cytochrome P450, Cytochrome P450, E-class, group I		M7SLB2	IPR001128, IPR002401, IPR017972	Cytochrome P450, Cytochrome P450, E-class, group I, Cytochrome P450, conserved site	XP_007795768.1		100	31.89	41.69	41.69
gene6799	Cluster1	2.01058	3.69043	3.28931	2.63029	2.90515	0.410014	351583	GO:0005215, GO:0006810, GO:0016021	transporter activity, transport, integral to membrane	IPR011701, IPR007114, IPR016196	Major facilitator superfamily MFS-1, Major facilitator superfamily, MFS general substrate transporter	MFS_1, MFS, MFS general substrate transporter	O94528	Caffeine resistance protein 5	caf5 SPBC609.04	IPR011701, IPR020846	Major facilitator superfamily, Major facilitator superfamily domain	spo:SPBC609.04	W3WR38	IPR004734, IPR011701, IPR020846	Multidrug resistance protein, Major facilitator superfamily, Major facilitator superfamily domain	XP_007839338.1		93.66	45.09	68.85	68.85
NOV_001082	Cluster1	2.477	2.73712	3.62372	2.76101	2.89971	0.187136							A9B660, F0XBZ9	Alanine--tR ligase (EC 6.1.1.7) (Alanyl-tR synthetase) (AlaRS), Putative uncharacterized protein	alaS Haur_3635, CMQ_1728	IPR002318;IPR018162;IPR018165;IPR018164;IPR023033;IPR003156;IPR018163;IPR009000;IPR012947;, IPR027417;IPR000330;IPR018857;				PF00041;PF13855;					33.5, 50.4				alanyl-tR aminoacylation [GO:0006419], TOR signaling [GO:0031929]	, DOMAIN 464 592 SNF2_N. {ECO:0000259|Pfam:PF00176}.
gene9438	Cluster1	2.77982	3.17055	1.87354	3.76062	2.89613	0.470469	242545			IPR002818	ThiJ/PfpI	DJ-1_PfpI	Q8G9F9	Isonitrile hydratase (EC 4.2.1.103) (Cyclohexyl-isocyanide hydratase)	inhA	IPR002818, IPR029062	DJ-1/PfpI, Class I glutamine amidotransferase-like	ag:BAC41251	A0A074XYC6	IPR002818, IPR029062	DJ-1/PfpI, Class I glutamine amidotransferase-like	KEQ90485.1		100	31.31	52.05	52.05
gene4910	Cluster1	3.18093	2.94604	2.67869	2.77851	2.89605	0.0361793	328273												P79927	IPR000436, IPR001846, IPR002919, IPR014853	Sushi/SCR/CCP domain, von Willebrand factor, type D domain, Trypsin Inhibitor-like, cysteine rich domain, Uncharacterised domain, cysteine-rich	CAA69604.1		100		36.99	36.99
NOV_004517	Cluster1	3.42142	3.20003	2.43334	2.4984	2.8883	0.185102							P45968, G4N5W0	Chromo domain-containing protein cec-3, Uncharacterized protein	cec-3 T09A5.8, MGG_17035	IPR000953;IPR023780;IPR016197;IPR023779;,				PF03822;PF00069;,					51.6, 118				negative regulation of gene expression [GO:0010629],	DOMAIN 24 84 Chromo. {ECO:0000255|PROSITE-ProRule:PRU00053}.,
gene2735	Cluster1	3.08618	2.65359	2.43933	3.36089	2.885	0.129779	16146						Q10294	cAMP-independent regulatory protein pac2	pac2 SPAC31G5.11	IPR018608	Gluconate transport inducer 1/Pac2	spo:SPAC31G5.11	K3VBN9	IPR018608	Gluconate transport inducer 1/Pac2	XP_009260236.1	XM_006666521.1	100	55.56	70.26	70.26	74.95
gene10905	Cluster1	2.5865	2.70981	2.67736	3.5398	2.87837	0.147874	324389						Q96WN6	Transcription factor ACEII	ace2	IPR001138	Zn(2)-C6 fungal-type D-binding domain		S3DD27	IPR001138	Zn(2)-C6 fungal-type D-binding domain	XP_008088686.1	XM_013396206.1	100	48.89	45.57	45.57	100
gene5879	Cluster1	2.39705	3.12418	2.6167	3.36866	2.87665	0.150232	339471	GO:0004497, GO:0005506, GO:0006118, GO:0020037, GO:0008688, GO:0018471, GO:0018630, GO:0018631, GO:0018632, GO:0018633, GO:0018634, GO:0018635, GO:0018636, GO:0018637, GO:0018638, GO:0018639, GO:0018640, GO:0018641, GO:0018642, GO:0018643, GO:0018644, GO:0018646, GO:0018647, GO:0018648, GO:0018649, GO:0018650, GO:0018651, GO:0018652, GO:0018653, GO:0018654, GO:0018655, GO:0018656, GO:0018657, GO:…	monooxygenase activity, iron ion binding, electron transport, heme binding, 3-(3-hydroxy-phenyl)propionate hydroxylase activity, 4-chlorobenzaldehyde oxidase activity, 3,5-xylenol methylhydroxylase activity, phenylacetate hydroxylase activity, 4-nitrophenol 4-monooxygenase activity, dimethyl sulfide monooxygenase activity, alpha-pinene monooxygenase [DH] activity, limonene 1,2-monooxygenase activ…	IPR002403, IPR001128	Cytochrome P450, E-class, group IV, Cytochrome P450	EP450IV, p450, CYTOCHROME_P450, Cytochrome P450	Q63688	25-hydroxycholesterol 7-alpha-hydroxylase (EC 1.14.13.100) (Cytochrome P450 7B1) (Hippocampal transcript 1 protein) (HCT-1) (Oxysterol 7-alpha-hydroxylase) (Fragment)	Cyp7b1	IPR001128, IPR002403	Cytochrome P450, Cytochrome P450, E-class, group IV	rno:25429	E9EK22	IPR001128, IPR002403, IPR017972	Cytochrome P450, Cytochrome P450, E-class, group IV, Cytochrome P450, conserved site	XP_007816296.1	XM_007918341.1	100	26.72	78.14	78.14	77.87
gene9407	Cluster1	1.8498	3.28942	2.8372	3.52421	2.87516	0.411419	93109	GO:0004553, GO:0005576, GO:0005975, GO:0030248	hydrolase activity, hydrolyzing O-glycosyl compounds, extracellular region, carbohydrate metabolic process, cellulose binding	IPR000254, IPR007117, IPR007112, IPR009009	Cellulose-binding region, fungal, Pollen allergen/expansin, C-terminal, Expansin 45, endoglucanase-like, Barwin-related endoglucanase	Q872L7_NEUCR_Q872L7;, CBM_1, Pollen_allerg_1, no description, EXPANSIN_EG45, EXPANSIN_CBD, CBM1_2, CBM1_1, PHL pollen allergen, Barwin-like endoglucanases, Cellulose-binding domain	Q7XT39	Expansin-B5 (Beta-expansin-5) (OsEXPB5) (OsaEXPb1.19)	EXPB5 Os04g0552200 LOC_Os04g46650 OSJNBa0010H02.8	IPR005795, IPR007112, IPR007117, IPR007118, IPR009009	Major pollen allergen Lol pI, Expansin/pollen allergen, DPBB domain, Expansin, cellulose-binding-like domain, Expansin/Lol pI, RlpA-like double-psi beta-barrel domain	osa:4336602	Q4WD28	IPR000254, IPR007112, IPR007117, IPR009009	Cellulose-binding domain, fungal, Expansin/pollen allergen, DPBB domain, Expansin, cellulose-binding-like domain, RlpA-like double-psi beta-barrel domain	XP_747748.1		100	30.47	77.78	77.78
gene9901	Cluster1	2.83509	2.91496	1.51365	4.20875	2.86811	0.908792	357599						P52989	Acyl-homoserine-lactone synthase (EC 2.3.1.184) (Autoinducer synthesis protein SwrI)	swrI	IPR001690, IPR016181, IPR018311	Autoinducer synthase, Acyl-CoA N-acyltransferase, Autoinducer synthesis, conserved site		A0A084FV68	IPR001138	Zn(2)-C6 fungal-type D-binding domain	KEZ38980.1		100	50	54.48	54.48
gene2438	Cluster1	3.00364	2.9995	2.9514	2.5085	2.86576	0.0429672	343619	GO:0003834	beta-carotene 15,15'-monooxygenase activity	IPR004294	Carotenoid oxygenase	RPE65	Q9JJS6	Beta,beta-carotene 15,15'-monooxygenase (EC 1.14.99.36) (Beta-carotene dioxygenase 1) (Beta-carotene oxygenase 1)	Bco1 Bcdo Bcdo1 Bcmo1	IPR004294	Carotenoid oxygenase		G4UYB7	IPR004294	Carotenoid oxygenase	XP_009852841.1		97.78	37.4	45.08	45.08
NOV_006375	Cluster1	2.21617	3.274	3.89206	2.07826	2.86512	0.565518								unknown_gene	unknown_gene	unknown_gene				unknown_gene									unknown_gene
gene7246	Cluster1	2.36861	1.94544	1.8958	5.2245	2.85859	1.89961	346809	GO:0005506, GO:0006118, GO:0009055, GO:0010181, GO:0004497, GO:0020037, GO:0016491, GO:0003958	iron ion binding, electron transport, electron carrier activity, FMN binding, monooxygenase activity, heme binding, oxidoreductase activity, DPH-hemoprotein reductase activity	IPR001094, IPR001709, IPR001128, IPR002401, IPR001433, IPR008254, IPR003097	Flavodoxin-like, Flavoprotein pyridine nucleotide cytochrome reductase, Cytochrome P450, Cytochrome P450, E-class, group I, Oxidoreductase FAD/D(P)-binding, Flavodoxin/nitric oxide synthase, FAD-binding, type 1	FLAVODOXIN, FPNCR, P450, EP450I, p450, D_binding_1, Flavodoxin_1, FAD_binding_1, FLAVODOXIN_LIKE, CYTOCHROME_P450, Cytochrome P450	Q9Y8G7	Bifunctional P-450:DPH-P450 reductase (Cytochrome P450foxy) (Fatty acid omega-hydroxylase) [Includes: Cytochrome P450 505 (EC 1.14.14.1); DPH--cytochrome P450 reductase (EC 1.6.2.4)]	CYP505	IPR001128, IPR001433, IPR002401, IPR003097, IPR008254, IPR017927, IPR017938, IPR017972, IPR023173, IPR023206, IPR029039	Cytochrome P450, Oxidoreductase FAD/D(P)-binding, Cytochrome P450, E-class, group I, FAD-binding, type 1, Flavodoxin/nitric oxide synthase, Ferredoxin reductase-type FAD-binding domain, Riboflavin synthase-like beta-barrel, Cytochrome P450, conserved site, DPH-cytochrome p450 reductase, FAD-binding, alpha-helical domain-3, Bifunctional cytochrome P450/DPH--cytochrome P450 reductase, Flavoprotein-…		B2AMA4	IPR001094, IPR001128, IPR001433, IPR001709, IPR003097, IPR008254, IPR017927, IPR017938, IPR017972, IPR023173, IPR029039	Flavodoxin-like, Cytochrome P450, Oxidoreductase FAD/D(P)-binding, Flavoprotein pyridine nucleotide cytochrome reductase, FAD-binding, type 1, Flavodoxin/nitric oxide synthase, Ferredoxin reductase-type FAD-binding domain, Riboflavin synthase-like beta-barrel, Cytochrome P450, conserved site, DPH-cytochrome p450 reductase, FAD-binding, alpha-helical domain-3, Flavoprotein-like domain	KGO65248.1		100	41.06	60.82	57.2
NOV_004661	Cluster1	1.92074	3.74484	3.10944	2.64527	2.85507	0.443346							A0PXT5	50S ribosomal protein L1	rplA NT01CX_1104	IPR005878;IPR002143;IPR023674;IPR028364;IPR016094;IPR016095;IPR023673;				PF08416;PF00018;					30				regulation of translation [GO:0006417]; translation [GO:0006412]
gene4164	Cluster1	3.09514	2.90715	2.89712	2.50202	2.85036	0.046667	79666	GO:0004553, GO:0005975	hydrolase activity, hydrolyzing O-glycosyl compounds, carbohydrate metabolic process	IPR000757, IPR008985	Glycoside hydrolase, family 16, Concanavalin A-like lectin/glucanase	Glyco_hydro_16, Concanavalin A-like lectins/glucanases	P23903	Glucan endo-1,3-beta-glucosidase A1 (EC 3.2.1.39) ((1->3)-beta-glucan endohydrolase) ((1->3)-beta-glucanase A1)	glcA	IPR000757, IPR008263, IPR013320	Glycoside hydrolase, family 16, Glycoside hydrolase, family 16, active site, Concanavalin A-like lectin/glucanase domain		A0A016PNP5	IPR000757, IPR013320	Glycoside hydrolase, family 16, Concanavalin A-like lectin/glucanase domain	XP_384944.1		100	30.22	73.08	73.08
gene7352	Cluster1	2.61215	2.81824	2.37423	3.5576	2.84056	0.196068	70323		unknown_gene		unknown_gene			unknown_gene			unknown_gene				unknown_gene			96.46
NOV_006434	Cluster1	4.45475	0.405627	4.72694	1.76604	2.83834	3.31187								unknown_gene	unknown_gene	unknown_gene				PF03136;									unknown_gene
gene7179	Cluster1	2.70056	3.01451	2.9793	2.64868	2.83576	0.0264582	351932	GO:0003677, GO:0006355	D binding, regulation of transcription, D-dependent	IPR000910, IPR009071	High mobility group box, HMG1/HMG2, High mobility group box, HMG	HMG_box, no description, HMG_BOX_2, HMG-box	P36631	Transcription factor ste11	ste11 stex SPBC32C12.02	IPR009071	High mobility group box domain	spo:SPBC32C12.02	T0LZ92	IPR009071	High mobility group box domain	EQB53845.1		99.78	38.64	43.01	43.01
gene2398	Cluster1	2.23675	3.21793	4.17462	1.67012	2.82485	0.91391	269861	GO:0004497, GO:0005506, GO:0006118, GO:0020037, GO:0018585, GO:0018586, GO:0018587, GO:0018588, GO:0018589, GO:0018590, GO:0018591, GO:0018592, GO:0018593, GO:0018594, GO:0018595, GO:0018596, GO:0018597, GO:0018598, GO:0018599, GO:0018600, GO:0043823	monooxygenase activity, iron ion binding, electron transport, heme binding, fluorene oxygenase activity, mono-butyltin dioxygenase activity, limonene 8-monooxygenase activity, tri-n-butyltin dioxygenase activity, di-n-butyltin dioxygenase activity, methylsilanetriol hydroxylase activity, methyl tertiary butyl ether 3-monooxygenase activity, 4-nitrocatechol 4-monooxygenase activity, 4-chlorophenox…	IPR001128, IPR002401	Cytochrome P450, Cytochrome P450, E-class, group I	P450, EP450I, p450, Cytochrome P450	Q00714	Probable sterigmatocystin biosynthesis P450 monooxygenase stcS (EC 1.14.-.-) (Cytochrome P450 59)	stcS cyp59 cyp59A1 verB AN7808	IPR001128, IPR002401	Cytochrome P450, Cytochrome P450, E-class, group I	ani:AN7808.2	G2QA74	IPR001128, IPR002403	Cytochrome P450, Cytochrome P450, E-class, group IV	XP_003661067.1		100	31.04	53.83	53.83
gene2440	Cluster1	2.63413	3.29335	3.24741	2.12414	2.82476	0.231355	335212						Q6FF40	Translation initiation factor IF-2	infB ACIAD0369	IPR000178, IPR000795, IPR005225, IPR006847, IPR009000, IPR009061, IPR013575, IPR023115, IPR027417	Translation initiation factor aIF-2, bacterial-like, Transcription factor, GTP-binding domain, Small GTP-binding protein domain, Translation initiation factor IF-2, N-terminal, Translation protein, beta-barrel domain, Putative D-binding domain, Initiation factor 2 associated domain, bacterial, Translation initiation factor IF- 2, domain 3, P-loop containing nucleoside triphosphate hydrolase	aci:ACIAD0369	W3XP14	IPR025676	Clr5 domain	XP_007827837.1		100	30.99	23.27	23.27
gene4066	Cluster1	3.16056	2.56838	2.9795	2.58981	2.82456	0.0644097	69208		unknown_gene		unknown_gene			unknown_gene			unknown_gene				unknown_gene			100
gene6212	Cluster1	2.22713	3.1249	2.92876	3.01659	2.82435	0.123714	355969		unknown_gene		unknown_gene			unknown_gene			unknown_gene		S3C746		unknown_gene	EPE09364.1		100		45.16	45.16
gene4238	Cluster1	3.11355	3.14083	1.82184	3.20934	2.82139	0.33425	355549	GO:0004616, GO:0006098, GO:0016491, GO:0003824, GO:0005488, GO:0008152, GO:0000252, GO:0000253, GO:0004033, GO:0004448, GO:0004495, GO:0008875, GO:0016229, GO:0018451, GO:0018452, GO:0018453, GO:0032442, GO:0033764, GO:0033765, GO:0043713, GO:0048258, GO:0051990	phosphogluconate dehydrogenase (decarboxylating) activity, pentose-phosphate shunt, oxidoreductase activity, catalytic activity, binding, metabolic process, C-3 sterol dehydrogenase (C-4 sterol decarboxylase) activity, 3-keto sterol reductase activity, aldo-keto reductase activity, isocitrate dehydrogenase activity, mevaldate reductase activity, gluconate dehydrogenase activity, steroid dehydroge…	IPR006115, IPR008927, IPR016040	6-phosphogluconate dehydrogenase, D-binding, 6-phosphogluconate dehydrogenase, C-terminal-like, D(P)-binding	D_binding_2, 6-phosphogluconate dehydrogenase C-terminal domain-like, D(P)-binding Rossmann-fold domains	O33730	Uncharacterized oxidoreductase Sfri_1503 (EC 1.1.-.-)	Sfri_1503	IPR002204, IPR006115, IPR008927, IPR013328, IPR015815, IPR016040, IPR029154	3-hydroxyisobutyrate dehydrogenase-related, conserved site, 6-phosphogluconate dehydrogenase, DP-binding, 6-phosphogluconate dehydrogenase C-terminal domain-like, 6-phosphogluconate dehydrogenase, domain 2, 3-hydroxyisobutyrate dehydrogenase-related, D(P)-binding domain, 3-hydroxyisobutyrate dehydrogenase, D-binding domain	sfr:Sfri_1503	R8BXK0	IPR006115, IPR008927, IPR013328, IPR015815, IPR016040	6-phosphogluconate dehydrogenase, DP-binding, 6-phosphogluconate dehydrogenase C-terminal domain-like, 6-phosphogluconate dehydrogenase, domain 2, 3-hydroxyisobutyrate dehydrogenase-related, D(P)-binding domain	XP_007911261.1		100	25.29	68.38	68.38
gene482	Cluster1	2.78985	2.9788	2.83807	2.67435	2.82027	0.0119168	66741												Q4A2N5	IPR021622	Afadin/alpha-actinin-binding	YP_294002.1		92.31		38.33	38.33
gene4840	Cluster1	2.53234	2.89239	3.04531	2.78834	2.81459	0.0349099	328130						A7GJ77	Elongation factor G (EF-G)	fusA CLI_3666	IPR000640, IPR000795, IPR004161, IPR004540, IPR005225, IPR005517, IPR009000, IPR009022, IPR014721, IPR020568, IPR027417, IPR031157	Translation elongation factor EFG, V domain, Transcription factor, GTP-binding domain, Translation elongation factor EFTu/EF1A, domain 2, Translation elongation factor EFG/EF2, Small GTP-binding protein domain, Translation elongation factor EFG/EF2, domain IV, Translation protein, beta-barrel domain, Elongation factor G, III-V domain, Ribosomal protein S5 domain 2-type fold, subgroup, Ribosomal p…	cbf:CLI_3666						97.78	42.86
gene6559	Cluster1	2.2753	2.96396	3.14428	2.84458	2.80703	0.105628	339467	GO:0008152, GO:0016491, GO:0003824, GO:0005488, GO:0004316	metabolic process, oxidoreductase activity, catalytic activity, binding, 3-oxoacyl-[acyl-carrier-protein] reductase activity	IPR002198, IPR002347, IPR016040	Short-chain dehydrogenase/reductase SDR, Glucose/ribitol dehydrogenase, D(P)-binding	SDRFAMILY, GDHRDH, adh_short, ADH_SHORT, D(P)-binding Rossmann-fold domains	P87025	Trihydroxynaphthalene reductase (EC 1.1.1.-) (T3HN reductase)	THR1 Cob_04570	IPR002198, IPR002347, IPR016040	Short-chain dehydrogenase/reductase SDR, Glucose/ribitol dehydrogenase, D(P)-binding domain		K2RUI2	IPR002198, IPR002347, IPR016040, IPR020904	Short-chain dehydrogenase/reductase SDR, Glucose/ribitol dehydrogenase, D(P)-binding domain, Short-chain dehydrogenase/reductase, conserved site	EKG18448.1	XM_007295231.1	90.88	43.06	67.03	67.03	94.87
gene11488	Cluster1	2.77581	3.09006	2.92445	2.43649	2.80671	0.0580414	358412		unknown_gene		unknown_gene			unknown_gene			unknown_gene				unknown_gene			100
gene757	Cluster1	2.28373	2.87878	3.19079	2.86771	2.80525	0.107484	320533						P82861	DPH:adrenodoxin oxidoreductase, mitochondrial (AR) (Adrenodoxin reductase) (EC 1.18.1.6) (Ferredoxin--DP(+) reductase) (Ferredoxin reductase)	fdxr	IPR016040, IPR021163, IPR023753	D(P)-binding domain, Ferredoxin-DP+ reductase, adrenodoxin-type, FAD/D(P)-binding domain		G9N686			EHK17648.1		100	35.29	54.39	54.39
gene3323	Cluster1	3.19559	3.27075	2.58566	2.16101	2.80325	0.208078	250526		unknown_gene		unknown_gene			unknown_gene			unknown_gene		G4N297		unknown_gene	XP_003712317.1		92.82		47.27	47.27
gene3240	Cluster1	3.01096	3.33811	3.10918	1.74773	2.80149	0.384232	75530	GO:0008152, GO:0016491	metabolic process, oxidoreductase activity	IPR015590, IPR016160, IPR016161	Aldehyde dehydrogenase, Aldehyde dehydrogenase, conserved site, Aldehyde/histidinol dehydrogenase	Aldedh, ALDEHYDE_DEHYDR_CYS, ALDEHYDE_DEHYDR_GLU, ALDH-like	C3MIE5	D/DP-dependent betaine aldehyde dehydrogenase (BADH) (EC 1.2.1.8)	betB NGR_c07000	IPR011264, IPR015590, IPR016160, IPR016161, IPR016162, IPR016163, IPR029510	Betaine aldehyde dehydrogenase, Aldehyde dehydrogenase domain, Aldehyde dehydrogenase, cysteine active site, Aldehyde/histidinol dehydrogenase, Aldehyde dehydrogenase N-terminal domain, Aldehyde dehydrogenase, C-terminal, Aldehyde dehydrogenase, glutamic acid active site	rhi:NGR_c07000	R1EBH8	IPR015590, IPR016161, IPR016162, IPR016163, IPR029510	Aldehyde dehydrogenase domain, Aldehyde/histidinol dehydrogenase, Aldehyde dehydrogenase N-terminal domain, Aldehyde dehydrogenase, C-terminal, Aldehyde dehydrogenase, glutamic acid active site	XP_007587690.1		99.37	33.8	58.33	58.33
gene11241	Cluster1	3.08438	3.27406	1.80377	3.04057	2.80069	0.338987	47533	GO:0003824, GO:0005488, GO:0008152, GO:0008106	catalytic activity, binding, metabolic process, alcohol dehydrogenase (DP+) activity	IPR013149, IPR013154, IPR011032, IPR016040	Alcohol dehydrogenase, zinc-binding, Alcohol dehydrogenase GroES-like, GroES-like, D(P)-binding	ADH_zinc_N, ADH_N, GroES-like, D(P)-binding Rossmann-fold domains	Q04894	DP-dependent alcohol dehydrogenase 6 (EC 1.1.1.2) (DP-dependent alcohol dehydrogenase VI) (ScADHVI)	ADH6 YMR318C YM9924.10C	IPR002085, IPR002328, IPR011032, IPR013149, IPR013154, IPR016040	Alcohol dehydrogenase superfamily, zinc-type, Alcohol dehydrogenase, zinc-type, conserved site, GroES-like, Alcohol dehydrogenase, C-terminal, Alcohol dehydrogenase, N-terminal, D(P)-binding domain	sce:YMR318C	G2QGG1	IPR002085, IPR002328, IPR011032, IPR013149, IPR013154, IPR016040	Alcohol dehydrogenase superfamily, zinc-type, Alcohol dehydrogenase, zinc-type, conserved site, GroES-like, Alcohol dehydrogenase, C-terminal, Alcohol dehydrogenase, N-terminal, D(P)-binding domain	XP_003663820.1		99.67	43.92	61.09	61.09
gene7628	Cluster1	2.91305	3.1826	2.65534	2.44512	2.79903	0.0765073	259751			IPR010721	Protein of unknown function DUF1295	DUF1295	Q8MLV1	Lamin-B receptor (dLBR)	LBR CG17952	IPR001171	Ergosterol biosynthesis ERG4/ERG24	dme:Dmel_CG17952	R8BML3	IPR001104, IPR010721	3-oxo-5-alpha-steroid 4-dehydrogenase, C-terminal, Protein of unknown function DUF1295	XP_007914774.1	XM_007916583.1	100	62.5	83.78	83.78	77.8
NOV_004167	Cluster1	2.77188	2.61485	3.09307	2.70587	2.79642	0.032443							G5EB30, R8BK13	Endochitinase A (EC 3.2.1.14) (Chitinase A), Putative glycoside hydrolase family 18 protein	chiA AN8241, UCRPA7_4827	IPR001223;IPR001579;IPR013781;IPR017853;, IPR001223;IPR013781;IPR017853;IPR018392;				PF00212;, PF00128;PF02922;					99, 168				chitin catabolic process [GO:0006032]; polysaccharide catabolic process [GO:0000272], carbohydrate metabolic process [GO:0005975]	, DOMAIN 381 427 LysM. {ECO:0000259|SMART:SM00257}.
gene9776	Cluster1	1.85446	3.73939	3.14401	2.43431	2.79304	0.507097	92978						Q12230	Sphingolipid long chain base-responsive protein LSP1	LSP1 YPL004C	IPR028245	Eisosome component PIL1/LSP1	sce:YPL004C	R8BV64	IPR028245	Eisosome component PIL1/LSP1	XP_007912002.1		98.88	55.7	82.76	82.76
gene11506	Cluster1	3.08093	2.81025	2.59126	2.67037	2.7882	0.0347119	343141	GO:0008152, GO:0016491, GO:0003824, GO:0005488, GO:0004303	metabolic process, oxidoreductase activity, catalytic activity, binding, estradiol 17-beta-dehydrogenase activity	IPR002198, IPR002347, IPR016040	Short-chain dehydrogenase/reductase SDR, Glucose/ribitol dehydrogenase, D(P)-binding	SDRFAMILY, GDHRDH, adh_short, ADH_SHORT, D(P)-binding Rossmann-fold domains	Q9X248	3-oxoacyl-[acyl-carrier-protein] reductase FabG (EC 1.1.1.100) (3-ketoacyl-acyl carrier protein reductase) (Beta-Ketoacyl-acyl carrier protein reductase) (Beta-ketoacyl-ACP reductase)	fabG TM_1724	IPR002198, IPR002347, IPR011284, IPR016040, IPR020904	Short-chain dehydrogenase/reductase SDR, Glucose/ribitol dehydrogenase, 3-oxoacyl-(acyl-carrier-protein) reductase, D(P)-binding domain, Short-chain dehydrogenase/reductase, conserved site	tma:TM1724	W7MMH6	IPR002198, IPR002347, IPR016040	Short-chain dehydrogenase/reductase SDR, Glucose/ribitol dehydrogenase, D(P)-binding domain	EWG48750.1		100	34.52	51.81	51.81
gene8140	Cluster1	3.13842	1.92855	3.02204	3.04218	2.7828	0.24518	340915	GO:0016614, GO:0050660, GO:0006066, GO:0008812	oxidoreductase activity, acting on CH-OH group of donors, FAD binding, alcohol metabolic process, choline dehydrogenase activity	IPR000172, IPR007867, IPR012132	Glucose-methanol-choline oxidoreductase, N-terminal, Glucose-methanol-choline oxidoreductase, C-terminal, Glucose-methanol-choline oxidoreductase	GMC_oxred_N, GMC_oxred_C, Alcohol oxidase, GMC_OXRED_1, GMC_OXRED_2	V5NDL4	Pyranose dehydrogenase (PDH) (EC 1.1.99.29) (Pyranose:quinone oxidoreductase 1)	pdh1	IPR000172, IPR007867, IPR012132, IPR023753	Glucose-methanol-choline oxidoreductase, N-terminal, Glucose-methanol-choline oxidoreductase, C-terminal, Glucose-methanol-choline oxidoreductase, FAD/D(P)-binding domain		C7ZIC7	IPR000172, IPR007867, IPR012132, IPR023753	Glucose-methanol-choline oxidoreductase, N-terminal, Glucose-methanol-choline oxidoreductase, C-terminal, Glucose-methanol-choline oxidoreductase, FAD/D(P)-binding domain	XP_003041895.1		100	37.04	80.77	80.77
gene3915	Cluster1	3.02432	2.18734	2.84866	3.02102	2.77034	0.118344	76089	GO:0005524, GO:0009396, GO:0030272	ATP binding, folic acid and derivative biosynthetic process, 5-formyltetrahydrofolate cyclo-ligase activity	IPR002698	5-formyltetrahydrofolate cyclo-ligase	5-FTHF_cyc-lig	Q2M296	Methenyltetrahydrofolate synthase domain-containing protein	MTHFSD	IPR000504, IPR002698, IPR012677, IPR024185	R recognition motif domain, 5-formyltetrahydrofolate cyclo-ligase, Nucleotide-binding alpha-beta plait domain, 5-formyltetrahydrofolate cyclo-ligase-like domain	hsa:64779	F0XGN1	IPR002698, IPR024185	5-formyltetrahydrofolate cyclo-ligase, 5-formyltetrahydrofolate cyclo-ligase-like domain	EFX02823.1		100	35.25	64.31	64.31
gene8674	Cluster1	2.40457	3.01542	2.31775	3.33386	2.7679	0.179053	331813						Q5DQR4	Syntaxin-binding protein 5-like (Lethal(2) giant larvae protein homolog 4) (Tomosyn-2)	Stxbp5l Llgl4	IPR000664, IPR001388, IPR001680, IPR013577, IPR013905, IPR015943, IPR017986, IPR019775	Lethal(2) giant larvae protein, Synaptobrevin, WD40 repeat, Lethal giant larvae homologue 2, Lethal giant larvae (Lgl)-like, C-terminal domain, WD40/YVTN repeat-like-containing domain, WD40-repeat-containing domain, WD40 repeat, conserved site	mmu:207227				XP_002561504.1		100	32.39	40.62
gene4130	Cluster1	2.49391	3.23994	2.66533	2.60217	2.75034	0.0836624	232346						P34731	Fatty acid synthase subunit beta (EC 2.3.1.86) [Includes: 3-hydroxyacyl-[acyl-carrier-protein] dehydratase (EC 4.2.1.59); Enoyl-[acyl-carrier-protein] reductase [DH] (EC 1.3.1.9); [Acyl-carrier-protein] acetyltransferase (EC 2.3.1.38); [Acyl-carrier-protein] malonyltransferase (EC 2.3.1.39); S-acyl fatty acid synthase thioesterase (EC 3.1.2.14)]	FAS1	IPR001227, IPR002539, IPR003965, IPR013565, IPR013785, IPR014043, IPR016035, IPR016452, IPR029069, IPR032088	Acyl transferase domain, MaoC-like domain, Fatty acid synthase, Domain of unknown function DUF1729, Aldolase-type TIM barrel, Acyl transferase, Acyl transferase/acyl hydrolase/lysophospholipase, Fatty acid synthase, beta subunit, fungi, HotDog domain, Starter unit:ACP transacylase		B6QIU4			XP_002149456.1		86.47	46.67	51.92	51.92
gene5409	Cluster1	3.60902	2.81019	2.79245	1.7785	2.74754	0.42178	70253	GO:0004497, GO:0006118, GO:0006725, GO:0008152, GO:0016491	monooxygenase activity, electron transport, aromatic compound metabolic process, metabolic process, oxidoreductase activity	IPR003042, IPR002938	Aromatic-ring hydroxylase, Monooxygenase, FAD-binding	RNGMNOXGSE, FAD_binding_3	Q93NG3	2,6-dihydroxypyridine 3-monooxygenase (2,6-DHPH) (EC 1.14.13.10)	dhpH	IPR023753	FAD/D(P)-binding domain	pg:15879611	B8MSF9	IPR023753	FAD/D(P)-binding domain	XP_002487608.1		100	26.92	47.48	47.48
gene8181	Cluster1	2.66518	2.71457	3.18444	2.41979	2.746	0.0765407	262887			IPR010730	Heterokaryon incompatibility	HET	Q9UV10	Heterokaryon incompatibility protein 6, OR allele (Het-6(OR))	het-6 B2A19.100 NCU03533	IPR010730	Heterokaryon incompatibility	ncr:NCU03533	G2YFM4	IPR010730	Heterokaryon incompatibility	XP_001547120.1		100	24.86	41.03	41.03
gene8080	Cluster1	2.37182	2.86038	2.61788	3.10369	2.73844	0.0743059	73810						Q62784	Type I inositol 3,4-bisphosphate 4-phosphatase (EC 3.1.3.66) (Inositol polyphosphate 4-phosphatase type I)	Inpp4a	IPR000008	C2 domain	rno:80849	C0NT19	IPR003594	Histidine kinase-like ATPase, C-terminal domain	EEH05180.1		100	35.85	38.89	38.89
gene285	Cluster1	2.42611	2.18669	2.89712	3.42356	2.73337	0.22411	66406	GO:0005622	intracellular	IPR001357	BRCT	BRCT, BRCT domain							F7W316	IPR001357	BRCT domain	XP_003350527.1		100		38.76	38.76
gene6074	Cluster1	3.02336	3.60102	3.21482	1.05564	2.72371	0.970775	68933						P71359	ATP-dependent D helicase RecQ (EC 3.6.4.12)	recQ HI_0728	IPR001650, IPR002121, IPR004589, IPR006293, IPR010997, IPR011545, IPR011991, IPR014001, IPR018982, IPR027417, IPR032284	Helicase, C-terminal, HRDC domain, D helicase, ATP-dependent, RecQ type, D helicase, ATP-dependent, RecQ type, bacterial, HRDC-like, DEAD/DEAH box helicase domain, Winged helix-turn-helix D-binding domain, Helicase superfamily 1/2, ATP-binding domain, RQC domain, P-loop containing nucleoside triphosphate hydrolase, ATP-dependent D helicase RecQ, zinc-binding domain	hin:HI0728	W9C4X5			ESZ89959.1		100	37.5	46.67	46.67
gene6800	Cluster1	2.98719	2.80905	2.56641	2.51766	2.72008	0.0359629	107401			IPR006598	Lipopolysaccharide-modifying protein	no description	Q5K8R6	Beta-1,2-xylosyltransferase 1 (Cxt1p) (EC 2.4.1.-)	CXT1 CNL04750	IPR006598	Lipopolysaccharide-modifying protein	cne:CNL04750	W3XQF7	IPR006598	Lipopolysaccharide-modifying protein	XP_007828868.1		100	25.26	41.87	41.87
gene10138	Cluster1	2.75244	2.58762	2.63234	2.90691	2.71983	0.0152994	108798	GO:0004871, GO:0007165	signal transducer activity, signal transduction	IPR000014	PAS	PAS	Q01371	White collar 1 protein (WC1)	wc-1 NCU02356	IPR000014, IPR000253, IPR000679, IPR001610, IPR013088, IPR013655	PAS domain, Forkhead-associated (FHA) domain, Zinc finger, GATA-type, PAC motif, Zinc finger, NHR/GATA-type, PAS fold-3	ncr:NCU02356	L2G2X3	IPR000014, IPR001610	PAS domain, PAC motif	XP_007278259.1		100	45.89	53.59	53.59
NOV_008244	Cluster1	3.21643	3.12691	2.73852	1.79652	2.7196	0.316295							Q135C9, D8RWN5	UPF0060 membrane protein RPD_3084, Pseudo response regulator	RPD_3084, PRR2 SELMODRAFT_415605	IPR003844;, IPR011006;IPR001789;				unknown_gene					29.6, 37.7				, phosphorelay signal transduction system [GO:0000160]	, DOMAIN 57 180 Response regulatory. {ECO:0000259|PROSITE:PS50110}.
NOV_003927	Cluster1	3.46129	3.19163	2.10943	2.10519	2.71688	0.380672							P45968, G4NJU1	Chromo domain-containing protein cec-3, Uncharacterized protein	cec-3 T09A5.8, MGG_18021	IPR000953;IPR023780;IPR016197;IPR023779;,				PF06355;,					36.2, 136				negative regulation of gene expression [GO:0010629],	DOMAIN 24 84 Chromo. {ECO:0000255|PROSITE-ProRule:PRU00053}.,
gene1639	Cluster1	2.54033	2.73082	2.56007	3.01779	2.71225	0.0366041	67008		unknown_gene		unknown_gene			unknown_gene			unknown_gene				unknown_gene
gene2938	Cluster1	2.58373	2.59058	3.0231	2.64985	2.71182	0.0329612	321013		unknown_gene		unknown_gene			unknown_gene			unknown_gene		A0A086T7M9		unknown_gene	KFH45361.1		100		39.39	39.39
gene6780	Cluster1	2.90923	2.63989	2.78403	2.50994	2.71077	0.0225282	260167	GO:0016810, GO:0006807	hydrolase activity, acting on carbon-nitrogen (but not peptide) bonds, nitrogen compound metabolic process	IPR003010, IPR000132	Nitrilase/cyanide hydratase and apolipoprotein N-acyltransferase, Nitrilase/cyanide hydratase, conserved site	CN_hydrolase, CN_HYDROLASE, NITRIL_CHT_1, NITRIL_CHT_2, Carbon-nitrogen hydrolase	Q02068	Aliphatic nitrilase (EC 3.5.5.7)		IPR000132, IPR003010	Nitrilase/cyanide hydratase, conserved site, Carbon-nitrogen hydrolase	ag:BAA02127	L2GJM8	IPR000132, IPR003010	Nitrilase/cyanide hydratase, conserved site, Carbon-nitrogen hydrolase	XP_007272695.1	XM_007282677.1	100	53.85	59.62	59.62	91.49
gene2587	Cluster1	2.44598	2.54213	3.64588	2.19249	2.70662	0.310381	335266						C1L2D3	Ribonuclease HIII (RNase HIII) (EC 3.1.26.4)	rnhC Lm4b_01233	IPR001352, IPR004641, IPR012337, IPR024567, IPR024568	Ribonuclease HII/HIII, Ribonuclease HIII, Ribonuclease H-like domain, Ribonuclease HII/HIII domain, Ribonuclease HIII, N-terminal	lmc:Lm4b_01233						96.02	42.86
gene8285	Cluster1	3.25645	1.81514	3.94005	1.71391	2.68139	0.900325	74162			IPR008775, IPR016083	Phytanoyl-CoA dioxygenase, Sterol-binding-like	PhyH, Sterol carrier protein, SCP	P67773	Uncharacterized protein Mb3657	Mb3657	IPR008775	Phytanoyl-CoA dioxygenase	mbo:Mb3657	T0M5E4	IPR008775	Phytanoyl-CoA dioxygenase	EQB56045.1		100	30.14	81.48	81.48
gene3701	Cluster1	2.44054	3.23316	3.00858	1.99643	2.66968	0.234534	251339			IPR005123	2OG-Fe(II) oxygenase	2OG-FeII_Oxy	Q12063	Dehydrodolichyl diphosphate syntase complex subunit NUS1 (EC 2.5.1.87) (Di-trans,poly-cis-decaprenylcistransferase) (Nuclear undecaprenyl pyrophosphate synthase 1) (Undecaprenyl diphosphate synthase) (UDS)	NUS1 YDL193W D1239	IPR001441	Decaprenyl diphosphate synthase-like	sce:YDL193W	A0A084QJK7	IPR005123, IPR027450, IPR032852	Oxoglutarate/iron-dependent dioxygenase, Alpha-ketoglutarate-dependent dioxygenase AlkB-like, D oxidative demethylase ALKBH2	KFA64142.1			31.33	69.7	69.7
gene7899	Cluster1	2.3344	2.4518	2.44836	3.39869	2.65831	0.18495	331384												V5FTF8	IPR005123, IPR027450	Oxoglutarate/iron-dependent dioxygenase, Alpha-ketoglutarate-dependent dioxygenase AlkB-like	GAD91872.1		100		27.57	27.57
gene11070	Cluster1	1.57018	2.43857	2.09437	4.52688	2.6575	1.26047	73366		unknown_gene		unknown_gene			unknown_gene			unknown_gene				unknown_gene			96.87
gene2198	Cluster1	2.49745	2.59837	3.06624	2.45183	2.65347	0.0596041	269357			IPR011118	Tannase and feruloyl esterase	Tannase	P78581	Tannase (EC 3.1.1.20) [Cleaved into: Tannase 33 kDa subunit; Tannase 30 kDa subunit]	AO090103000074	IPR011118, IPR029058	Tannase/feruloyl esterase, Alpha/Beta hydrolase fold	aor:AOR_1_142034	G7XNX0	IPR011118, IPR029058	Tannase/feruloyl esterase, Alpha/Beta hydrolase fold	GAA88767.1		100	48.71	67.25	67.25
gene2979	Cluster1	2.77294	3.14037	2.88858	1.8075	2.65235	0.255569	71854	GO:0005215, GO:0006810, GO:0016021	transporter activity, transport, integral to membrane	IPR011701, IPR007114, IPR016196	Major facilitator superfamily MFS-1, Major facilitator superfamily, MFS general substrate transporter	MFS_1, MFS, MFS general substrate transporter							S3C287	IPR011701, IPR020846	Major facilitator superfamily, Major facilitator superfamily domain	EPE05841.1		60.61		89.47	89.47
gene1119	Cluster1	3.09045	2.97158	2.29585	2.1913	2.63729	0.158148	343748	GO:0016021	integral to membrane	IPR004307	TspO/MBR-related protein	Q7SEL1_NEUCR_Q7SEL1;, TspO_MBR, Peripheral-type benzodiazepine receptor/signal transduction protein TspO	O94327	Translocator protein homolog	SPBC725.10	IPR004307	TspO/MBR-related protein	spo:SPBC725.10	A0A084R535	IPR004307	TspO/MBR-related protein	KEY71124.1		100	39.46	62.42	62.42
gene753	Cluster1	2.41408	3.59169	3.06891	1.46421	2.63472	0.630775	326261		unknown_gene		unknown_gene			unknown_gene			unknown_gene				unknown_gene			100
gene6262	Cluster1	2.43041	2.87621	2.13169	3.09723	2.63388	0.141751	225201												G8GKM6	IPR004875, IPR006600, IPR007889, IPR009057	DDE superfamily endonuclease, CENP-B-like, HTH CenpB-type D-binding domain, D binding HTH domain, Psq-type, Homeodomain-like	AER39694.1		100		56.36	56.36
gene6552	Cluster1	2.13637	2.34101	2.78493	3.2519	2.62855	0.184483	330029	GO:0003676	nucleic acid binding	IPR012337	Polynucleotidyl transferase, Ribonuclease H fold	Ribonuclease H-like	Q2XSV9	Guanine nucleotide-binding protein subunit alpha-11 (G alpha-11) (G-protein subunit alpha-11)	G11	IPR000654, IPR001019, IPR011025, IPR027417	G-protein alpha subunit, group Q, Guanine nucleotide binding protein (G-protein), alpha subunit, G protein alpha subunit, helical insertion, P-loop containing nucleoside triphosphate hydrolase	ssc:733588	G2XFX0			XP_009655047.1		100	21.28	41.67	41.67
gene10075	Cluster1	2.22489	2.51958	2.76233	2.99982	2.62665	0.0826353	342200	GO:0004497, GO:0005506, GO:0006118, GO:0020037	monooxygenase activity, iron ion binding, electron transport, heme binding	IPR001128	Cytochrome P450	p450, Cytochrome P450	Q9UW95	Versicolorin B desaturase (EC 1.14.19.n5) (Aflatoxin biosynthesis protein L)	verB aflL	IPR001128, IPR002401, IPR017972	Cytochrome P450, Cytochrome P450, E-class, group I, Cytochrome P450, conserved site		A0A086STD0	IPR001128, IPR002401, IPR017972	Cytochrome P450, Cytochrome P450, E-class, group I, Cytochrome P450, conserved site	KFH40362.1		100	35.64	68.6	68.6
gene2396	Cluster1	2.60444	3.33802	2.83016	1.72696	2.62489	0.339345	348640			IPR004294	Carotenoid oxygenase	RPE65	C3VEQ4	Carotenoid 9,10(9',10')-cleavage dioxygenase 1 (EC 1.14.99.n4) (Carotenoid cleavage dioxygenase 1) (OgCCD1)	CCD1	IPR004294	Carotenoid oxygenase		A0A010QWP5	IPR004294	Carotenoid oxygenase	XP_007591715.1		94.65	28.47	68.55	68.55
gene6765	Cluster1	2.29699	3.35439	3.50662	1.34081	2.6247	0.766501	257015	GO:0004672, GO:0005524, GO:0006468, GO:0004674	protein kinase activity, ATP binding, protein amino acid phosphorylation, protein serine/threonine kinase activity	IPR000719, IPR017442, IPR002290, IPR008271, IPR011009	Protein kinase, core, Serine/threonine protein kinase-related, Serine/threonine protein kinase, Serine/threonine protein kinase, active site, Protein kinase-like	Q7QZT5_EEEEE_Q7QZT5;, Pkinase, no description, PROTEIN_KISE_DOM, PROTEIN_KISE_ST, Protein kinase-like (PK-like)	Q9U1Y5	Serine/threonine-protein kinase chk-2 (EC 2.7.11.1) (Ce-cds-1) (Ce-chk-2)	chk-2 cds-1 Y60A3A.12	IPR000253, IPR000719, IPR002290, IPR008271, IPR008984, IPR011009, IPR017441, IPR020636	Forkhead-associated (FHA) domain, Protein kinase domain, Serine/threonine/dual specificity protein kinase, catalytic domain, Serine/threonine-protein kinase, active site, SMAD/FHA domain, Protein kinase-like domain, Protein kinase, ATP binding site, Calcium/calmodulin-dependent/calcium-dependent protein kinase	cel:CELE_Y60A3A.12	A0A010QVC7	IPR000719, IPR011009	Protein kinase domain, Protein kinase-like domain	XP_007592223.1		100	32.26	42.57	42.57
gene4225	Cluster1	2.58297	2.5699	2.67597	2.65146	2.62007	0.00200094	274809						P21969	Primase D5 (EC 3.6.4.-)	FPV058 FPD5	IPR004968, IPR014015, IPR014818, IPR027417	D primase/nucleoside triphosphatase, C-terminal, Helicase, superfamily 3, D virus, Bacteriophage/plasmid primase, P4, C-terminal, P-loop containing nucleoside triphosphate hydrolase	vg:1486606	C7ZCL0	IPR027417	P-loop containing nucleoside triphosphate hydrolase	XP_003044099.1		82.46	30.43	41.67	41.67
gene4971	Cluster1	2.3261	2.93146	2.30808	2.90877	2.6186	0.0910164	69455	GO:0005215, GO:0006810, GO:0016020	transporter activity, transport, membrane	IPR011701, IPR005829, IPR016196	Major facilitator superfamily MFS-1, Sugar transporter, conserved site, MFS general substrate transporter	MFS_1, SUGAR_TRANSPORT_1, MFS general substrate transporter	Q6DG19	Molybdate-anion transporter (Major facilitator superfamily domain-containing protein 5) (Molybdate transporter 2 homolog)	mfsd5 zgc:91807	IPR008509, IPR020846	Molybdate-anion transporter, Major facilitator superfamily domain	dre:436986	A0A074WQN3	IPR008509, IPR020846	Molybdate-anion transporter, Major facilitator superfamily domain	KEQ75475.1		100	40.71	33.12	33.12
gene2372	Cluster1	1.89529	2.7699	3.0715	2.73267	2.61734	0.19105	335102						B7KI47	33 kDa chaperonin (Heat shock protein 33 homolog) (HSP33)	hslO PCC7424_5185	IPR000397, IPR016153, IPR016154	Heat shock protein Hsp33, Heat shock protein Hsp33, N-terminal, Heat shock protein Hsp33, C-terminal	cyc:PCC7424_5185	M7SY94			XP_007791627.1		100	35.29	71.67	71.67
gene9048	Cluster1	2.59805	2.4705	2.38994	3.00936	2.61696	0.0568298	357320	GO:0008152, GO:0016491, GO:0003824, GO:0005488, GO:0043738, GO:0043826, GO:0043883, GO:0051341	metabolic process, oxidoreductase activity, catalytic activity, binding, F420H2 dehydrogenase activity, sulfur oxygenase reductase activity, malolactic enzyme activity, regulation of oxidoreductase activity	IPR002198, IPR002347, IPR016040	Short-chain dehydrogenase/reductase SDR, Glucose/ribitol dehydrogenase, D(P)-binding	SDRFAMILY, GDHRDH, adh_short, D(P)-binding Rossmann-fold domains	Q4A054	Uncharacterized oxidoreductase SSP0419 (EC 1.-.-.-)	SSP0419	IPR002198, IPR002347, IPR016040	Short-chain dehydrogenase/reductase SDR, Glucose/ribitol dehydrogenase, D(P)-binding domain	ssp:SSP0419	G9N3N3	IPR002198, IPR002347, IPR016040	Short-chain dehydrogenase/reductase SDR, Glucose/ribitol dehydrogenase, D(P)-binding domain	EHK18916.1		100	33.33	72.39	72.39
gene10506	Cluster1	3.05167	2.78837	2.6246	1.98253	2.61179	0.155203	64654	GO:0008152, GO:0016491, GO:0003824, GO:0005488, GO:0016630	metabolic process, oxidoreductase activity, catalytic activity, binding, protochlorophyllide reductase activity	IPR002347, IPR002198, IPR016040	Glucose/ribitol dehydrogenase, Short-chain dehydrogenase/reductase SDR, D(P)-binding	GDHRDH, adh_short, D(P)-binding Rossmann-fold domains	O74959	Uncharacterized oxidoreductase C736.13 (EC 1.-.-.-)	SPCC736.13	IPR002198, IPR002347, IPR016040	Short-chain dehydrogenase/reductase SDR, Glucose/ribitol dehydrogenase, D(P)-binding domain	spo:SPCC736.13	Q5AZ14	IPR001128, IPR002198, IPR002401, IPR008949, IPR016040, IPR017972	Cytochrome P450, Short-chain dehydrogenase/reductase SDR, Cytochrome P450, E-class, group I, Isoprenoid synthase domain, D(P)-binding domain, Cytochrome P450, conserved site	XP_664070.1		100	37.8	61.14	61.14
gene4737	Cluster1	2.69121	2.82789	2.55814	2.36807	2.61133	0.0288211	337743	GO:0003824, GO:0005488, GO:0008152, GO:0000252, GO:0000253, GO:0004033, GO:0004448, GO:0004495, GO:0008875, GO:0016229, GO:0018451, GO:0018452, GO:0018453, GO:0032442, GO:0033764, GO:0033765, GO:0043713, GO:0048258, GO:0051990	catalytic activity, binding, metabolic process, C-3 sterol dehydrogenase (C-4 sterol decarboxylase) activity, 3-keto sterol reductase activity, aldo-keto reductase activity, isocitrate dehydrogenase activity, mevaldate reductase activity, gluconate dehydrogenase activity, steroid dehydrogenase activity, epoxide dehydrogenase activity, 5-exo-hydroxycamphor dehydrogenase activity, 2-hydroxytetrahyd…	IPR016040	D(P)-binding	D(P)-binding Rossmann-fold domains	Q08651	Probable oxidoreductase ENV9 (EC 1.1.1.-) (Late endosome and vacuole interface protein 9)	ENV9 YOR246C	IPR002198, IPR002347, IPR016040	Short-chain dehydrogenase/reductase SDR, Glucose/ribitol dehydrogenase, D(P)-binding domain	sce:YOR246C	G2RI57	IPR002198, IPR002347, IPR016040	Short-chain dehydrogenase/reductase SDR, Glucose/ribitol dehydrogenase, D(P)-binding domain	XP_003657855.1		100	33.33	66.36	66.36
NOV_004576	Cluster1	3.11244	1.49843	2.63475	3.19023	2.60896	0.456326							P53520	Chaperone protein PmfD	pmfD PMI1879	IPR008962;IPR001829;IPR016148;IPR018046;IPR016147;				PF01513;, PF00079;					31.6				cell wall organization [GO:0071555]; chaperone-mediated protein folding [GO:0061077]; pilus organization [GO:0043711]
gene10967	Cluster1	2.75298	2.69853	2.58626	2.38332	2.60527	0.0200343	334340			IPR011001	Saposin-like	Saposin	P97714	Alpha-1D adrenergic receptor (Alpha-1A adrenergic receptor) (Alpha-1D adrenoreceptor) (Alpha-1D adrenoceptor)	Adra1d Adra1a Gpcr8	IPR000276, IPR000363, IPR002233, IPR017452	G protein-coupled receptor, rhodopsin-like, Alpha 1D adrenoceptor, Adrenoceptor family, GPCR, rhodopsin-like, 7TM		A0A061IVX8	IPR032675	Leucine-rich repeat domain, L domain-like	EEH47052.2		76.92	39.53	36.84	33.33
gene1496	Cluster1	2.22695	2.76974	1.96965	3.4432	2.60238	0.319074	336019	GO:0004497, GO:0005506, GO:0006118, GO:0020037	monooxygenase activity, iron ion binding, electron transport, heme binding	IPR002401, IPR001128	Cytochrome P450, E-class, group I, Cytochrome P450	EP450I, CYTOCHROME_P450, Cytochrome P450	P10615	Cytochrome P450 52A1 (EC 1.14.14.-) (Alkane-inducible P450-ALK1) (CYPLIIA1)	CYP52A1	IPR001128, IPR002402, IPR002974, IPR017972	Cytochrome P450, Cytochrome P450, E-class, group II, Cytochrome P450, E-class, CYP52, Cytochrome P450, conserved site		W3XG68	IPR001128, IPR002401, IPR017972	Cytochrome P450, Cytochrome P450, E-class, group I, Cytochrome P450, conserved site	XP_007829214.1		100	29.91	70.37	70.37
NOV_003322	Cluster1	2.87757	2.58539	2.56641	2.36781	2.59929	0.0330751								unknown_gene	unknown_gene	unknown_gene				PF03633;PF03632;PF03636;PF02358;									unknown_gene
NOV_005992	Cluster1	2.61072	2.76655	2.49934	2.50905	2.59642	0.0115516							Q6XHB2, R8BUQ2	Probable serine/threonine-protein kinase roco4 (EC 2.7.11.1) (Ras of complex proteins and C-terminal of roc 4), Uncharacterized protein	roco4 DDB_G0288251, UCRPA7_1369	IPR032171;IPR011009;IPR032675;IPR001611;IPR003591;IPR013684;IPR027417;IPR000719;IPR017441;IPR020859;IPR001245;IPR020635;IPR015943;IPR001680;IPR017986;,				PF00136;					37.4, 329				slug development involved in sorocarp development [GO:0031153]; small GTPase mediated signal transduction [GO:0007264]; sorocarp stalk development [GO:0031150],	DOMAIN 364 544 Roc. {ECO:0000255|PROSITE-ProRule:PRU00758}.; DOMAIN 1026 1292 Protein kinase. {ECO:0000255|PROSITE-ProRule:PRU00159}.,
gene6338	Cluster1	3.40348	1.24721	3.09618	2.62112	2.592	0.680501	356056						P55607	Uncharacterized protein y4oV	NGR_a02140 y4oV	IPR009215, IPR013785, IPR015813	TIM-barrel domain, IGPS-like, Aldolase-type TIM barrel, Pyruvate/Phosphoenolpyruvate kinase-like domain	rhi:NGR_a02140						100	34.62
gene7594	Cluster1	2.50823	2.75618	2.32495	2.77842	2.59194	0.0350101	330797		unknown_gene		unknown_gene			unknown_gene			unknown_gene				unknown_gene			96.13
NOV_002806	Cluster1	2.22062	2.49502	2.54794	3.09755	2.59028	0.101211								unknown_gene	unknown_gene	unknown_gene				PF03668;									unknown_gene
gene4638	Cluster1	3.38974	3.02639	3.08817	0.855025	2.58983	1.02208	350921	GO:0003824, GO:0008152	catalytic activity, metabolic process	IPR014030, IPR014031, IPR016039	Beta-ketoacyl synthase, N-terminal, Beta-ketoacyl synthase, C-terminal, Thiolase-like	ketoacyl-synt, Ketoacyl-synt_C, Thiolase-like	Q9Y7D5	Lovastatin diketide synthase LovF (LDKS) (EC 2.3.1.244)	lovF	IPR001227, IPR006162, IPR009081, IPR011032, IPR013149, IPR013217, IPR013968, IPR014030, IPR014031, IPR014043, IPR016035, IPR016036, IPR016039, IPR016040, IPR018201, IPR020801, IPR020807, IPR020841, IPR020843, IPR029063	Acyl transferase domain, Phosphopantetheine attachment site, Acyl carrier protein-like, GroES-like, Alcohol dehydrogenase, C-terminal, Methyltransferase type 12, Polyketide synthase, ketoreductase domain, Beta-ketoacyl synthase, N-terminal, Beta-ketoacyl synthase, C-terminal, Acyl transferase, Acyl transferase/acyl hydrolase/lysophospholipase, Malonyl-CoA ACP transacylase, ACP-binding, Thiolase-l…		B8MSF8	IPR001227, IPR006162, IPR009081, IPR011032, IPR013217, IPR013968, IPR014030, IPR014031, IPR014043, IPR016035, IPR016036, IPR016039, IPR016040, IPR018201, IPR020801, IPR020807, IPR020841, IPR029063	Acyl transferase domain, Phosphopantetheine attachment site, Acyl carrier protein-like, GroES-like, Methyltransferase type 12, Polyketide synthase, ketoreductase domain, Beta-ketoacyl synthase, N-terminal, Beta-ketoacyl synthase, C-terminal, Acyl transferase, Acyl transferase/acyl hydrolase/lysophospholipase, Malonyl-CoA ACP transacylase, ACP-binding, Thiolase-like, D(P)-binding domain, Beta-keto…	XP_002487607.1	XM_002487562.1	100	56.82	78.43	78.43	81.15
NOV_009044	Cluster1	2.5415	2.83173	2.26442	2.6944	2.58301	0.0443735							Q08777, R8BHH4	Riboflavin transporter MCH5, Putative major facilitator superfamily transporter protein	MCH5 YOR306C, UCRPA7_5682	IPR011701;IPR020846;, IPR011701;IPR020846;									139, 522				ion transmembrane transport [GO:0034220]; riboflavin transport [GO:0032218], transmembrane transport [GO:0055085]	, DOMAIN 80 463 MFS. {ECO:0000259|PROSITE:PS50850}.
gene10480	Cluster1	2.02939	3.32119	0.839838	4.09716	2.57189	1.54555	357698	GO:0004364	glutathione transferase activity	IPR004046, IPR004045, IPR010987, IPR012336	Glutathione S-transferase, C-terminal, Glutathione S-transferase, N-terminal, Glutathione S-transferase, C-terminal-like, Thioredoxin-like fold	GST_C, GST_N, Glutathione S-transferase (GST), C-terminal domain, Thioredoxin-like	Q9Y7Q2	Glutathione S-transferase 1 (EC 2.5.1.18) (GST-I)	gst1 SPCC191.09c	IPR004045, IPR004046, IPR010987, IPR012336	Glutathione S-transferase, N-terminal, Glutathione S-transferase, C-terminal, Glutathione S-transferase, C-terminal-like, Thioredoxin-like fold	spo:SPCC191.09c	R8BKM6	IPR004045, IPR004046, IPR010987, IPR012336	Glutathione S-transferase, N-terminal, Glutathione S-transferase, C-terminal, Glutathione S-transferase, C-terminal-like, Thioredoxin-like fold	XP_007915437.1	XM_007880028.1	100	40.19	82.17	82.17	75.62
gene5415	Cluster1	2.28888	3.38671	2.34529	2.26448	2.57134	0.222468	67731						Q5B9N7	Eukaryotic translation initiation factor 3 subunit A (eIF3a) (Eukaryotic translation initiation factor 3 110 kDa subunit homolog) (eIF3 p110) (Translation initiation factor eIF3, p110 subunit homolog)	tif32 AN2743	IPR000717, IPR027512	Proteasome component (PCI) domain, Eukaryotic translation initiation factor 3 subunit A	ani:AN2743.2	W3WNJ1	IPR021765	Protein of unknown function DUF3328	XP_007839070.1		97.51	39.62	50.3	50.3
gene6251	Cluster1	2.20255	2.10052	2.79269	3.18418	2.56998	0.195558	68062		unknown_gene		unknown_gene			unknown_gene			unknown_gene		M7SQK3		unknown_gene	XP_007794144.1		64.14		51.95	51.95
gene11131	Cluster1	2.22361	2.93064	2.62049	2.4949	2.56741	0.0645534	358451						P22022	Regulatory protein wetA	wetA AN1937			ani:AN1937.2	R8BUV1			XP_007912114.1		100	63.79	76.56	76.56
gene3036	Cluster1	2.15444	2.68685	2.31582	3.10363	2.56519	0.133903	321111						Q0TNZ8	Penicillin-binding protein 1A (PBP1a) [Includes: Penicillin-insensitive transglycosylase (EC 2.4.2.-) (Peptidoglycan TGase); Penicillin-sensitive transpeptidase (EC 3.4.-.-) (DD-transpeptidase)]	pbpA CPF_2218	IPR001264, IPR001460, IPR012338, IPR023346	Glycosyl transferase, family 51, Penicillin-binding protein, transpeptidase, Beta-lactamase/transpeptidase-like, Lysozyme-like domain	cpf:CPF_2218	E3QJK3	IPR000591, IPR011991, IPR027244	DEP domain, Winged helix-turn-helix D-binding domain, Vacuolar membrane-associated protein Iml1	EFQ31041.1		100	41.18	55.17	55.17
NOV_012240	Cluster1	2.44508	2.46678	2.75544	2.58624	2.56339	0.015184								unknown_gene	unknown_gene	unknown_gene				PF05699;PF14372;, PF05699;									unknown_gene
gene2510	Cluster1	2.07424	2.1455	3.18284	2.84771	2.56257	0.219615	51589						P0A8Y4	Alpha-D-glucose-1-phosphate phosphatase YihX (Alpha-D-glucose-1-P phosphatase) (EC 3.1.3.10) (Alpha-D-glucose-1-phosphatase)	yihX SF3957 S3789	IPR006439, IPR023198, IPR023214	HAD hydrolase, subfamily IA, Phosphoglycolate phosphatase, domain 2, HAD-like domain	sfx:S3789, sfl:SF3957	M7SHW3	IPR008930, IPR023214	Terpenoid cyclases/protein prenyltransferase alpha-alpha toroid, HAD-like domain	XP_007797198.1		100	37.1	69.7	69.7
gene9990	Cluster1	2.30833	2.53999	2.83681	2.54839	2.55838	0.0351212	65720			IPR008949	Terpenoid synthase	Terpenoid synthases	Q6WP50	Presilphiperfolan-8-beta-ol synthase (PSPS) (EC 4.2.3.74) (Botrydial synthesis protein 2) (Calcineurin-dependent protein 15) (Sesquiterpene cyclase BOT2) (Sesquiterpene synthase BOT2)	BOT2 CND15	IPR005630, IPR008949	Terpene synthase, metal-binding domain, Isoprenoid synthase domain	ag:AAQ16575	R1EVE2	IPR005630, IPR008949	Terpene synthase, metal-binding domain, Isoprenoid synthase domain	XP_007580980.1		100	41.67	46.56	46.56
gene4636	Cluster1	3.44113	2.81273	2.55781	1.41278	2.55611	0.539078	231719		unknown_gene		unknown_gene			unknown_gene			unknown_gene		A0A086SZG0		unknown_gene	KFH42492.1		100		37	37
gene5660	Cluster1	2.92669	2.77603	1.90084	2.61295	2.55413	0.154572	239708												A0A084RWM8	IPR001138	Zn(2)-C6 fungal-type D-binding domain	KFA80613.1		87.27		67.02	67.02
gene1881	Cluster1	2.06522	2.29778	1.60427	4.20935	2.54416	0.986588	272492	GO:0005215, GO:0006810, GO:0016021	transporter activity, transport, integral to membrane	IPR011701, IPR007114, IPR016196	Major facilitator superfamily MFS-1, Major facilitator superfamily, MFS general substrate transporter	MFS_1, MFS, MFS general substrate transporter	O42922	Uncharacterized MFS-type transporter C16A3.17c	SPBC16A3.17c	IPR011701, IPR020846	Major facilitator superfamily, Major facilitator superfamily domain	spo:SPBC16A3.17c	R8BLD1	IPR011701, IPR020846	Major facilitator superfamily, Major facilitator superfamily domain	XP_007915024.1	XM_003649269.1	100	33.18	80.47	80.47	76.12
gene4221	Cluster1	2.05813	2.79023	1.55466	3.76578	2.5422	0.692054	350499	GO:0003824, GO:0005488, GO:0008152, GO:0004022, GO:0004023, GO:0004024, GO:0004025	catalytic activity, binding, metabolic process, alcohol dehydrogenase activity, alcohol dehydrogenase activity, metal ion-independent, alcohol dehydrogenase activity, zinc-dependent, alcohol dehydrogenase activity, iron-dependent	IPR013149, IPR013154, IPR011032, IPR016040	Alcohol dehydrogenase, zinc-binding, Alcohol dehydrogenase GroES-like, GroES-like, D(P)-binding	ADH_zinc_N, ADH_N, GroES-like, D(P)-binding Rossmann-fold domains	Q9P7F4	Zinc-type alcohol dehydrogenase-like protein C2E1P3.01 (EC 1.-.-.-)	SPAC2E1P3.01	IPR002085, IPR011032, IPR013149, IPR016040	Alcohol dehydrogenase superfamily, zinc-type, GroES-like, Alcohol dehydrogenase, C-terminal, D(P)-binding domain	spo:SPAC2E1P3.01	M7T2A3	IPR002085, IPR011032, IPR013149, IPR016040	Alcohol dehydrogenase superfamily, zinc-type, GroES-like, Alcohol dehydrogenase, C-terminal, D(P)-binding domain	XP_007790256.1		92.05	32.91	59.64	59.64
gene6313	Cluster1	2.03557	2.91727	1.95764	3.24393	2.5386	0.307858	256003	GO:0008152, GO:0016491, GO:0003824, GO:0005488, GO:0043738, GO:0043826, GO:0043883, GO:0051341	metabolic process, oxidoreductase activity, catalytic activity, binding, F420H2 dehydrogenase activity, sulfur oxygenase reductase activity, malolactic enzyme activity, regulation of oxidoreductase activity	IPR002347, IPR002198, IPR016040	Glucose/ribitol dehydrogenase, Short-chain dehydrogenase/reductase SDR, D(P)-binding	GDHRDH, adh_short, D(P)-binding Rossmann-fold domains	Q7Z9I4	Uncharacterized oxidoreductase C663.06c (EC 1.-.-.-)	SPCC663.06c	IPR002198, IPR002347, IPR016040	Short-chain dehydrogenase/reductase SDR, Glucose/ribitol dehydrogenase, D(P)-binding domain	spo:SPCC663.06c	A0A084G086	IPR002198, IPR002347, IPR016040	Short-chain dehydrogenase/reductase SDR, Glucose/ribitol dehydrogenase, D(P)-binding domain	KEZ40748.1		89.12	29.05	62.77	62.77
gene4783	Cluster1	1.75094	2.89186	2.57671	2.89977	2.52982	0.219194	328028						B5X0E4	ATP-binding cassette sub-family B member 5 (ABCB5 P-gp) (P-glycoprotein ABCB5)	Abcb5	IPR003439, IPR003593, IPR011527, IPR017871, IPR027417	ABC transporter-like, AAA+ ATPase domain, ABC transporter type 1, transmembrane domain, ABC transporter, conserved site, P-loop containing nucleoside triphosphate hydrolase	mmu:77706	W3WZW0			XP_007835924.1		75	36.67	33.77	33.77
gene4639	Cluster1	3.33022	3.10177	3.05718	0.62787	2.52926	1.21582	252109	GO:0008152, GO:0003824, GO:0005488	metabolic process, catalytic activity, binding	IPR014043, IPR016035, IPR016036	Acyl transferase, Acyl transferase/acyl hydrolase/lysophospholipase, Malonyl-CoA ACP transacylase, ACP-binding	Acyl_transf_1, FabD/lysophospholipase-like, Probable ACP-binding domain of malonyl-CoA ACP transacylase	Q9Y7D5	Lovastatin diketide synthase LovF (LDKS) (EC 2.3.1.244)	lovF	IPR001227, IPR006162, IPR009081, IPR011032, IPR013149, IPR013217, IPR013968, IPR014030, IPR014031, IPR014043, IPR016035, IPR016036, IPR016039, IPR016040, IPR018201, IPR020801, IPR020807, IPR020841, IPR020843, IPR029063	Acyl transferase domain, Phosphopantetheine attachment site, Acyl carrier protein-like, GroES-like, Alcohol dehydrogenase, C-terminal, Methyltransferase type 12, Polyketide synthase, ketoreductase domain, Beta-ketoacyl synthase, N-terminal, Beta-ketoacyl synthase, C-terminal, Acyl transferase, Acyl transferase/acyl hydrolase/lysophospholipase, Malonyl-CoA ACP transacylase, ACP-binding, Thiolase-l…		A0A086T3Z2	IPR001227, IPR006162, IPR009081, IPR011032, IPR013217, IPR013968, IPR014030, IPR014031, IPR014043, IPR016035, IPR016036, IPR016039, IPR016040, IPR020801, IPR020806, IPR020807, IPR020841, IPR020843, IPR029063	Acyl transferase domain, Phosphopantetheine attachment site, Acyl carrier protein-like, GroES-like, Methyltransferase type 12, Polyketide synthase, ketoreductase domain, Beta-ketoacyl synthase, N-terminal, Beta-ketoacyl synthase, C-terminal, Acyl transferase, Acyl transferase/acyl hydrolase/lysophospholipase, Malonyl-CoA ACP transacylase, ACP-binding, Thiolase-like, D(P)-binding domain, Polyketid…	KFH44074.1		100	52.17	64	64
gene10868	Cluster1	2.12336	3.00729	3.03623	1.94067	2.52689	0.249176	268538	GO:0016491, GO:0005507, GO:0008471	oxidoreductase activity, copper ion binding, laccase activity	IPR001117, IPR011706, IPR011707, IPR002355, IPR008972	Multicopper oxidase, type 1, Multicopper oxidase, type 2, Multicopper oxidase, type 3, Multicopper oxidase, copper-binding site, Cupredoxin	Cu-oxidase, Cu-oxidase_2, Cu-oxidase_3, MULTICOPPER_OXIDASE1, MULTICOPPER_OXIDASE2, Cupredoxins	P78591	Iron transport multicopper oxidase FET3 (EC 1.-.-.-)	FET3	IPR001117, IPR002355, IPR008972, IPR011706, IPR011707	Multicopper oxidase, type 1, Multicopper oxidase, copper-binding site, Cupredoxin, Multicopper oxidase, type 2, Multicopper oxidase, type 3		R8BTI7	IPR001117, IPR002355, IPR008972, IPR011706, IPR011707	Multicopper oxidase, type 1, Multicopper oxidase, copper-binding site, Cupredoxin, Multicopper oxidase, type 2, Multicopper oxidase, type 3	XP_007912543.1	XM_002462240.1	90.94	34.36	55.14	55.14	92.16
gene10409	Cluster1	2.3421	1.7746	1.04842	4.91701	2.52053	2.12461	50160	GO:0005506, GO:0016491, GO:0050589	iron ion binding, oxidoreductase activity, leucocyanidin oxygenase activity	IPR002283, IPR005123	Isopenicillin N synthase, 2OG-Fe(II) oxygenase	IPNSYNTHASE, 2OG-FeII_Oxy	Q9M2C4	1-aminocyclopropane-1-carboxylate oxidase homolog 8 (EC 1.14.-.-)	At3g61400 F2A19.2 T20K12.300	IPR005123, IPR026992, IPR027443	Oxoglutarate/iron-dependent dioxygenase, Non-haem dioxygenase N-terminal domain, Isopenicillin N synthase-like	ath:AT3G61400	B8MJU5	IPR002283, IPR005123, IPR026992, IPR027443	Isopenicillin N synthase, Oxoglutarate/iron-dependent dioxygenase, Non-haem dioxygenase N-terminal domain, Isopenicillin N synthase-like	XP_002484715.1		89.97	27.39	77.92	77.92
gene9157	Cluster1	2.44703	3.06781	2.46632	2.093	2.51854	0.122655	263261	GO:0003824, GO:0005488, GO:0008152	catalytic activity, binding, metabolic process	IPR016040	D(P)-binding	D(P)-binding Rossmann-fold domains	Q4WZ69	Festuclavine dehydrogenase (EC 1.5.1.44) (Ergot alkaloid biosynthetic protein A)	fgaFS AFUA_2G17970	IPR007110, IPR016040, IPR019901	Immunoglobulin-like domain, D(P)-binding domain, Ergot alkaloid biosynthesis protein	afm:AFUA_2G17970	A0A010QWA3	IPR016040, IPR019901	D(P)-binding domain, Ergot alkaloid biosynthesis protein	XP_007591955.1		100	35.11	43.41	43.41
NOV_011948	Cluster1	3.32192	3.05242	2.34125	1.31909	2.50867	0.600044							C0Z887, A2R016	Uracil-D glycosylase (UDG) (EC 3.2.2.27), Aspergillus niger contig An12c0220, genomic contig	ung BBR47_55370, An12g07000	IPR002043;IPR018085;IPR005122;, IPR009057;IPR012337;				, PF00171;					31.2, 157				base-excision repair [GO:0006284],	,
gene1896	Cluster1	2.39918	2.82987	2.68618	2.10626	2.50537	0.0771378	245539	GO:0005215, GO:0006810, GO:0016020	transporter activity, transport, membrane	IPR000425	Major intrinsic protein	Q7SGN1_NEUCR_Q7SGN1;, MINTRINSICP, MIP, Aquaporin-like	C8ZJM1	Aquaporin-1	AQY1 EC1118_1P2_5391g	IPR000425, IPR022357, IPR023271	Major intrinsic protein, Major intrinsic protein, conserved site, Aquaporin-like		X0GVA9	IPR000425, IPR023271	Major intrinsic protein, Aquaporin-like	EGU81510.1		100	50	65.33	65.33
gene2309	Cluster1	2.34329	2.05492	2.55342	3.04567	2.49933	0.130817	358592	GO:0006810, GO:0008519, GO:0016020	transport, ammonium transmembrane transporter activity, membrane	IPR010256, IPR001905	Rh-like protein/ammonium transporter, Ammonium transporter	Ammonium_transp, AMMONIUM_TRANSP, Ammonium ransporter (Pfam 00909)	P40260	Ammonium transporter MEP1	MEP1 AMT1 YGR121C G6331	IPR001905, IPR018047, IPR024041, IPR029020	Ammonium transporter, Ammonium transporter, conserved site, Ammonium transporter AmtB-like domain, Ammonium/urea transporter	sce:YGR121C	R8BXB9	IPR001905, IPR018047, IPR024041, IPR029020	Ammonium transporter, Ammonium transporter, conserved site, Ammonium transporter AmtB-like domain, Ammonium/urea transporter	XP_007911206.1	XM_003661820.1	100	48.3	88.44	88.44	87.44
gene5377	Cluster1	2.18895	3.16143	1.7192	2.92562	2.4988	0.331261	80584	GO:0008415, GO:0048037, GO:0008152, GO:0003824, GO:0005488	acyltransferase activity, cofactor binding, metabolic process, catalytic activity, binding	IPR013149, IPR014030, IPR014043, IPR000542, IPR014031, IPR013154, IPR013217, IPR013968, IPR006163, IPR009081, IPR011032, IPR016040, IPR016035, IPR016039, IPR016036	Alcohol dehydrogenase, zinc-binding, Beta-ketoacyl synthase, N-terminal, Acyl transferase, Acyltransferase ChoActase/COT/CPT, Beta-ketoacyl synthase, C-terminal, Alcohol dehydrogenase GroES-like, Methyltransferase type 12, Polyketide synthase, KR, Phosphopantetheine-binding, Acyl carrier protein-like, GroES-like, D(P)-binding, Acyl transferase/acyl hydrolase/lysophospholipase, Thiolase-like, Malo…	ADH_zinc_N, ketoacyl-synt, Acyl_transf_1, Carn_acyltransf, Ketoacyl-synt_C, ADH_N, Methyltransf_12, KR, ACP_DOMAIN, ACYLTRANSF_C_2, ACP-like, GroES-like, D(P)-binding Rossmann-fold domains, FabD/lysophospholipase-like, Thiolase-like, Probable ACP-binding domain of malonyl-CoA ACP transacylase	Q9Y7D5	Lovastatin diketide synthase LovF (LDKS) (EC 2.3.1.244)	lovF	IPR001227, IPR006162, IPR009081, IPR011032, IPR013149, IPR013217, IPR013968, IPR014030, IPR014031, IPR014043, IPR016035, IPR016036, IPR016039, IPR016040, IPR018201, IPR020801, IPR020807, IPR020841, IPR020843, IPR029063	Acyl transferase domain, Phosphopantetheine attachment site, Acyl carrier protein-like, GroES-like, Alcohol dehydrogenase, C-terminal, Methyltransferase type 12, Polyketide synthase, ketoreductase domain, Beta-ketoacyl synthase, N-terminal, Beta-ketoacyl synthase, C-terminal, Acyl transferase, Acyl transferase/acyl hydrolase/lysophospholipase, Malonyl-CoA ACP transacylase, ACP-binding, Thiolase-l…		S7ZE97	IPR000542, IPR001227, IPR009081, IPR011032, IPR013217, IPR013968, IPR014030, IPR014031, IPR014043, IPR016035, IPR016036, IPR016039, IPR016040, IPR020801, IPR020807, IPR020841, IPR020843, IPR029063, IPR032821	Acyltransferase ChoActase/COT/CPT, Acyl transferase domain, Acyl carrier protein-like, GroES-like, Methyltransferase type 12, Polyketide synthase, ketoreductase domain, Beta-ketoacyl synthase, N-terminal, Beta-ketoacyl synthase, C-terminal, Acyl transferase, Acyl transferase/acyl hydrolase/lysophospholipase, Malonyl-CoA ACP transacylase, ACP-binding, Thiolase-like, D(P)-binding domain, Polyketide…	EPS28980.1	XM_007754273.1	98.76	52.71	74.42	74.42	82
gene8126	Cluster1	1.46088	2.95513	2.62553	2.94979	2.49783	0.376242	279340	GO:0004620, GO:0009395, GO:0008152	phospholipase activity, phospholipid catabolic process, metabolic process	IPR002642, IPR016035	Lysophospholipase, catalytic region, Acyl transferase/acyl hydrolase/lysophospholipase	PLA2_B, no description, PLA2C, FabD/lysophospholipase-like	P0C958	Lysophospholipase 3 (EC 3.1.1.5) (Phospholipase B 3)	plb3 AFUA_3G14680	IPR002642, IPR016035	Lysophospholipase, catalytic domain, Acyl transferase/acyl hydrolase/lysophospholipase	afm:AFUA_3G14680	T0LNQ4	IPR002642, IPR016035	Lysophospholipase, catalytic domain, Acyl transferase/acyl hydrolase/lysophospholipase	EQB49855.1		100	37.7	61.96	61.96
gene8035	Cluster1	2.74477	2.61465	2.50623	2.09782	2.49087	0.0586285	356928			IPR016181	Acyl-CoA N-acyltransferase	Acyl-CoA N-acyltransferases (Nat)	Q04170	Uncharacterized protein YDR391C	YDR391C	IPR016181	Acyl-CoA N-acyltransferase	sce:YDR391C	W3WMH7	IPR000182, IPR013653, IPR016181	GT domain, FR47-like, Acyl-CoA N-acyltransferase	XP_007840329.1		100	25.56	46.61	46.61
gene6141	Cluster1	2.11292	3.49424	2.02449	2.33169	2.49083	0.34811	16211	GO:0005515	protein binding	IPR011333	BTB/POZ fold	POZ domain	A5DRM4	D-directed R polymerase III subunit RPC3 (R polymerase III subunit C3)	RPC82 RPC3 LELG_00010	IPR008806, IPR013197	R polymerase III Rpc82, C -terminal, R polymerase III subunit RPC82-related, helix-turn-helix	lel:LELG_00010	A0A094C4S4	IPR011333	SKP1/BTB/POZ domain	KFY42445.1		90.38	52.94	37.31	37.31
gene1967	Cluster1	2.44716	2.3222	2.23833	2.93781	2.48637	0.0734519	247944	GO:0003676, GO:0005622, GO:0008270	nucleic acid binding, intracellular, zinc ion binding	IPR007087, IPR015880	Zinc finger, C2H2-type, Zinc finger, C2H2-like	ZN91_HUMAN_Q05481;, zf-C2H2, no description, ZINC_FINGER_C2H2_2, ZINC_FINGER_C2H2_1	Q80V23	Zinc finger protein 32 (Zinc finger protein 637)	Znf32 Zfp637	IPR007087, IPR013087, IPR015880	Zinc finger, C2H2, Zinc finger C2H2-type/integrase D-binding domain, Zinc finger, C2H2-like	mmu:232337	C3YSE2	IPR007087, IPR013087, IPR015880	Zinc finger, C2H2, Zinc finger C2H2-type/integrase D-binding domain, Zinc finger, C2H2-like	XP_002601035.1		100	54.84	53.57	53.57
gene7892	Cluster1	2.64885	2.72374	1.94768	2.61543	2.48392	0.0973893	322863		unknown_gene		unknown_gene			unknown_gene			unknown_gene		E9EEQ9		unknown_gene	XP_007814697.1		100		46.05	46.05
gene9894	Cluster1	1.6591	3.47861	2.31054	2.48425	2.48313	0.42495	352926	GO:0003824, GO:0030976, GO:0000287, GO:0016831, GO:0004737	catalytic activity, thiamin pyrophosphate binding, magnesium ion binding, carboxy-lyase activity, pyruvate decarboxylase activity	IPR012000, IPR011766, IPR012001, IPR012110	Thiamine pyrophosphate enzyme, central region, Thiamine pyrophosphate enzyme, C-terminal TPP-binding, Thiamine pyrophosphate enzyme, N-terminal TPP binding region, Pyruvate decarboxylase/indolepyruvate decarboxylase	TPP_enzyme_M, TPP_enzyme_C, TPP_enzyme_N, Pyruvate decarboxylase/indolepyruvate decarboxylase	Q6FJA3	Pyruvate decarboxylase (EC 4.1.1.1)	PDC1 PDC CAGL0M07920g	IPR000399, IPR011766, IPR012000, IPR012001, IPR012110, IPR029035, IPR029061	TPP-binding enzyme, conserved site, Thiamine pyrophosphate enzyme, C-terminal TPP-binding, Thiamine pyrophosphate enzyme, central domain, Thiamine pyrophosphate enzyme, N-terminal TPP-binding domain, Thiamine pyrophosphate (TPP)-dependent enzyme, DHS-like D/FAD-binding domain, Thiamin diphosphate-binding fold	cgr:CAGL0M07920g	B2AMN0	IPR011766, IPR012000, IPR012001, IPR012110, IPR029035, IPR029061	Thiamine pyrophosphate enzyme, C-terminal TPP-binding, Thiamine pyrophosphate enzyme, central domain, Thiamine pyrophosphate enzyme, N-terminal TPP-binding domain, Thiamine pyrophosphate (TPP)-dependent enzyme, DHS-like D/FAD-binding domain, Thiamin diphosphate-binding fold	XP_001905311.1		100	62.96	73.81	73.81
gene8002	Cluster1	2.40915	1.47316	3.0993	2.9223	2.47598	0.399459	261797	GO:0003700, GO:0005634, GO:0006355, GO:0008270	transcription factor activity, nucleus, regulation of transcription, D-dependent, zinc ion binding	IPR001138, IPR002409	Fungal transcriptional regulatory protein, N-terminal, Aflatoxin biosynthesis regulatory protein	FUNGALZNCYS, AFLATOXINBRP, Zn_clus, ZN2_CY6_FUNGAL_2, ZN2_CY6_FUNGAL_1, Zn2/Cys6 D-binding domain	P43651	Aflatoxin biosynthesis regulatory protein	aflR apa-2	IPR001138, IPR002409, IPR013700	Zn(2)-C6 fungal-type D-binding domain, Aflatoxin biosynthesis regulatory protein, Aflatoxin regulatory protein		A0A093XMW7	IPR001138, IPR002409, IPR013700	Zn(2)-C6 fungal-type D-binding domain, Aflatoxin biosynthesis regulatory protein, Aflatoxin regulatory protein	KFX46568.1		100	65	72.73	72.73
gene7225	Cluster1	2.22992	2.7366	2.51752	2.3812	2.46631	0.0347016	259069	GO:0016491, GO:0050660, GO:0003824, GO:0016631, GO:0018498, GO:0018499, GO:0018500, GO:0018501, GO:0018502, GO:0018503, GO:0043786	oxidoreductase activity, FAD binding, catalytic activity, enoyl-[acyl-carrier-protein] reductase activity, 2,3-dihydroxy-2,3-dihydro-phenylpropionate dehydrogenase activity, cis-2,3-dihydrodiol DDT dehydrogenase activity, trans-9R,10R-dihydrodiolphenanthrene dehydrogenase activity, cis-chlorobenzene dihydrodiol dehydrogenase activity, 2,5-dichloro-2,5-cyclohexadiene-1,4-diol dehydrogenase activit…	IPR006094, IPR016166	FAD linked oxidase, N-terminal, FAD-binding, type 2	FAD_binding_4, FAD-binding domain	Q15392	Delta(24)-sterol reductase (EC 1.3.1.72) (24-dehydrocholesterol reductase) (3-beta-hydroxysterol delta-24-reductase) (Diminuto/dwarf1 homolog) (Seladin-1)	DHCR24 KIAA0018	IPR006094, IPR016166, IPR016169	FAD linked oxidase, N-terminal, FAD-binding, type 2, CO dehydrogenase flavoprotein-like, FAD-binding, subdomain 2	hsa:1718	R8BKA7	IPR006094, IPR016166, IPR016169	FAD linked oxidase, N-terminal, FAD-binding, type 2, CO dehydrogenase flavoprotein-like, FAD-binding, subdomain 2	XP_007915427.1	XM_009855675.1	100	27.2	59.12	59.12	100
gene7491	Cluster1	2.88417	2.54053	2.23757	2.19741	2.46492	0.0761846	98565	GO:0003913, GO:0006281, GO:0003904	D photolyase activity, D repair, deoxyribodipyrimidine photo-lyase activity	IPR005101, IPR002081, IPR006050	D photolyase, FAD-binding/Cryptochrome, C-terminal, Cryptochrome/D photolyase, class 1, D photolyase, N-terminal	Q870B8_FUSOX_Q870B8;, DPHOTLYASE, D_photolyase, FAD_binding_7, D_PHOTOLYASES_1_1, D_PHOTOLYASES_1_2, Cryptochrome/photolyase FAD-binding domain, Cryptochrome/photolyase, N-terminal domain	P27526	Deoxyribodipyrimidine photo-lyase (EC 4.1.99.3) (D photolyase) (Photoreactivating enzyme)	phr NCU08626	IPR002081, IPR005101, IPR006050, IPR014729, IPR018394	Cryptochrome/D photolyase class 1, Cryptochrome/D photolyase, FAD-binding domain, D photolyase, N-terminal, Rossmann-like alpha/beta/alpha sandwich fold, Cryptochrome/D photolyase class 1, conserved site, C-terminal	ncr:NCU08626	A0A066X9D0	IPR002081, IPR005101, IPR006050, IPR014729, IPR018394	Cryptochrome/D photolyase class 1, Cryptochrome/D photolyase, FAD-binding domain, D photolyase, N-terminal, Rossmann-like alpha/beta/alpha sandwich fold, Cryptochrome/D photolyase class 1, conserved site, C-terminal	KDN64274.1	XM_007291766.1	100	71.79	81.43	81.43	78
gene7717	Cluster1	1.45981	1.63916	3.6965	3.06288	2.46459	0.891614	258342	GO:0005315, GO:0006817, GO:0016020	inorganic phosphate transmembrane transporter activity, phosphate transport, membrane	IPR001204	Phosphate transporter	PHO4	P15710	Phosphate-repressible phosphate permease pho-4	pho-4 van NCU09564	IPR001204	Phosphate transporter	ncr:NCU09564	B0YB83	IPR001204	Phosphate transporter	EDP48473.1	XM_007583637.1	100	60	93.75	93.75	84.29
gene117	Cluster1	1.5379	3.47928	3.57117	1.20599	2.44858	1.17398	348798						Q9LEC8	Glutamate dehydrogenase B (GDH B) (EC 1.4.1.3)	GDHB	IPR006095, IPR006096, IPR006097, IPR014362, IPR016040	Glutamate/phenylalanine/leucine/valine dehydrogenase, Glutamate/phenylalanine/leucine/valine dehydrogenase, C-terminal, Glutamate/phenylalanine/leucine/valine dehydrogenase, dimerisation domain, Glutamate dehydrogenase, D(P)-binding domain		C9SRT9	IPR000719, IPR011009	Protein kinase domain, Protein kinase-like domain	XP_003002155.1		100	44.12	33.01	33.01
NOV_009418	Cluster1	3.17674	2.78888	2.02509	1.79668	2.44685	0.312582							Q609A8	Nucleoid-associated protein MCA1327	MCA1327	IPR004401;				, PF00270;PF00567;					31.2
gene4640	Cluster1	3.10761	3.13917	3.07088	0.462834	2.44512	1.31041	102242												G3XXU4	IPR001227, IPR006162, IPR009081, IPR011032, IPR013217, IPR013968, IPR014030, IPR014031, IPR014043, IPR016035, IPR016036, IPR016039, IPR016040, IPR018201, IPR020801, IPR020807, IPR020841, IPR029063	Acyl transferase domain, Phosphopantetheine attachment site, Acyl carrier protein-like, GroES-like, Methyltransferase type 12, Polyketide synthase, ketoreductase domain, Beta-ketoacyl synthase, N-terminal, Beta-ketoacyl synthase, C-terminal, Acyl transferase, Acyl transferase/acyl hydrolase/lysophospholipase, Malonyl-CoA ACP transacylase, ACP-binding, Thiolase-like, D(P)-binding domain, Beta-keto…	EHA24574.1		100		29.28	29.28
gene6929	Cluster1	2.20647	2.78332	1.56433	3.22243	2.44414	0.387834	356529	GO:0008152, GO:0016491, GO:0003824, GO:0005488, GO:0000252, GO:0000253, GO:0004033, GO:0004448, GO:0004495, GO:0008875, GO:0016229, GO:0018451, GO:0018452, GO:0018453, GO:0032442, GO:0033764, GO:0033765, GO:0043713, GO:0048258, GO:0051990	metabolic process, oxidoreductase activity, catalytic activity, binding, C-3 sterol dehydrogenase (C-4 sterol decarboxylase) activity, 3-keto sterol reductase activity, aldo-keto reductase activity, isocitrate dehydrogenase activity, mevaldate reductase activity, gluconate dehydrogenase activity, steroid dehydrogenase activity, epoxide dehydrogenase activity, 5-exo-hydroxycamphor dehydrogenase ac…	IPR002347, IPR002198, IPR016040	Glucose/ribitol dehydrogenase, Short-chain dehydrogenase/reductase SDR, D(P)-binding	GDHRDH, adh_short, D(P)-binding Rossmann-fold domains	Q9HBH5	Retinol dehydrogenase 14 (EC 1.1.1.-) (Alcohol dehydrogenase PAN2) (Short chain dehydrogenase/reductase family 7C member 4)	RDH14 PAN2 SDR7C4 UNQ529/PRO1072	IPR002198, IPR002347, IPR016040	Short-chain dehydrogenase/reductase SDR, Glucose/ribitol dehydrogenase, D(P)-binding domain	hsa:57665	A1D5S3	IPR002198, IPR002347, IPR016040	Short-chain dehydrogenase/reductase SDR, Glucose/ribitol dehydrogenase, D(P)-binding domain	XP_001262964.1		100	37.01	76.47	76.47
gene9889	Cluster1	2.20778	2.40051	1.80864	3.34885	2.44144	0.320024	333165	GO:0004672, GO:0005524, GO:0006468	protein kinase activity, ATP binding, protein amino acid phosphorylation	IPR000719, IPR011009	Protein kinase, core, Protein kinase-like	PROTEIN_KISE_DOM, Protein kinase-like (PK-like)							A0A090MDY6			CEG05358.1		100		37.84	37.84
NOV_001253	Cluster1	1.95377	2.75176	3.12666	1.90903	2.4353	0.271741								unknown_gene	unknown_gene	unknown_gene				PF00069;, PF00069;									unknown_gene
gene9166	Cluster1	2.39453	2.68397	1.34647	3.29604	2.43026	0.497454	263875	GO:0016787	hydrolase activity	IPR004843	Metallophosphoesterase	Metallophos	O15442	Metallophosphoesterase domain-containing protein 1 (EC 3.1.-.-) (Adult brain protein 239) (239AB)	MPPED1 C22orf1 FAM1A	IPR004843, IPR024201, IPR029052	Calcineurin-like phosphoesterase domain, apaH type, Calcineurin-like phosphoesterase, Metallo-dependent phosphatase-like	hsa:758	J5JUD4	IPR004843, IPR029052	Calcineurin-like phosphoesterase domain, apaH type, Metallo-dependent phosphatase-like	XP_008598426.1	XM_003660868.1	100	34.26	55.96	55.96	91.84
gene6791	Cluster1	1.92457	2.85608	2.16431	2.76587	2.42771	0.155096	62602	GO:0005524, GO:0016887, GO:0000166, GO:0017111, GO:0006810, GO:0016021, GO:0042626	ATP binding, ATPase activity, nucleotide binding, nucleoside-triphosphatase activity, transport, integral to membrane, ATPase activity, coupled to transmembrane movement of substances	IPR003439, IPR013525, IPR010929, IPR003593	ABC transporter-like, ABC-2 type transporter, CDR ABC transporter, AAA+ ATPase, core	Q96W59_MYCGR_Q96W59;, ABC_tran, ABC2_membrane, PDR_CDR, no description, ABC_TRANSPORTER_2, ABC_TRANSPORTER_1	P41820	Brefeldin A resistance protein	bfr1 hba2 SPCC18B5.01c SPCPJ732.04c	IPR003439, IPR003593, IPR005285, IPR010929, IPR013525, IPR017871, IPR027417, IPR029481	ABC transporter-like, AAA+ ATPase domain, Pleiotropic drug resistance protein PDR/CDR, CDR ABC transporter, ABC-2 type transporter, ABC transporter, conserved site, P-loop containing nucleoside triphosphate hydrolase, ABC-transporter extracellular N-terminal domain	spo:SPCC18B5.01c	W3X0W6	IPR003439, IPR003593, IPR010929, IPR013525, IPR017871, IPR027417	ABC transporter-like, AAA+ ATPase domain, CDR ABC transporter, ABC-2 type transporter, ABC transporter, conserved site, P-loop containing nucleoside triphosphate hydrolase	XP_007835416.1	XM_007592565.1	100	40.87	80.44	80.44	75.07
gene9113	Cluster1	2.56801	2.74983	2.1979	2.16682	2.42064	0.0610308	72187		unknown_gene		unknown_gene			unknown_gene			unknown_gene		A0A075PEL9		unknown_gene	WP_032897733.1		98.41		32.88	31.51
gene4021	Cluster1	2.00318	2.66905	2.72018	2.25967	2.41302	0.0878461	252258												R8BWU6	IPR026195, IPR029058	P-selectin glycoprotein ligand 1, Alpha/Beta hydrolase fold	XP_007911458.1		100		60.2	60.2
NOV_006794	Cluster1	3.29565	1.52149	2.99346	1.83306	2.41092	0.561775							Q6LNV9	Trigger factor (TF) (EC 5.2.1.8) (PPIase)	tig PBPRA2638	IPR001179;IPR005215;IPR008880;IPR008881;IPR027304;				PF15077;					35				cell cycle [GO:0007049]; cell division [GO:0051301]; protein folding [GO:0006457]; protein transport [GO:0015031]	DOMAIN 161 246 PPIase FKBP-type. {ECO:0000255|HAMAP-Rule:MF_00303}.
gene5325	Cluster1	3.55815	1.35185	3.0993	1.63058	2.40997	0.880146	329041												C7ZAR5	IPR031353	CHT-NTPase, sigma domain	KGQ03362.1		100		33.33	64.91
gene3479	Cluster1	2.49073	1.90867	2.65462	2.57845	2.40812	0.0865137	273076	GO:0006865, GO:0015171, GO:0016020, GO:0006810	amino acid transport, amino acid transmembrane transporter activity, membrane, transport	IPR004841, IPR002293	Amino acid permease-associated region, Amino acid/polyamine transporter I	AA_permease, Amino acid transporter	O60170	Probable amino-acid permease meu22 (Meiotic expression up-regulated protein 22)	meu22 SPBC19F8.06c	IPR002293, IPR004840, IPR004841	Amino acid/polyamine transporter I, Amino acid permease, conserved site, Amino acid permease/ SLC12A domain	spo:SPBC19F8.06c	G9MNF7	IPR002293, IPR004841	Amino acid/polyamine transporter I, Amino acid permease/ SLC12A domain	EHK23413.1		92.49	47.27	92.73	92.73
gene5101	Cluster1	1.87572	2.7009	2.36209	2.67665	2.40384	0.110831	254104	GO:0005215, GO:0006810, GO:0016021	transporter activity, transport, integral to membrane	IPR011701, IPR007114, IPR016196	Major facilitator superfamily MFS-1, Major facilitator superfamily, MFS general substrate transporter	MFS_1, MFS, MFS general substrate transporter	P46996	Uncharacterized membrane protein YJL163C	YJL163C J0544	IPR011701, IPR020846	Major facilitator superfamily, Major facilitator superfamily domain	sce:YJL163C	R8BWX8	IPR005829, IPR011701, IPR020846	Sugar transporter, conserved site, Major facilitator superfamily, Major facilitator superfamily domain	XP_007911255.1	XM_003660499.1	100	22.75	64.65	64.65	75.15
gene8450	Cluster1	1.40497	2.77385	2.20433	3.23162	2.40369	0.46492	261162	GO:0004497, GO:0005506, GO:0006118, GO:0020037, GO:0008688, GO:0018471, GO:0018630, GO:0018631, GO:0018632, GO:0018633, GO:0018634, GO:0018635, GO:0018636, GO:0018637, GO:0018638, GO:0018639, GO:0018640, GO:0018641, GO:0018642, GO:0018643, GO:0018644, GO:0018646, GO:0018647, GO:0018648, GO:0018649, GO:0018650, GO:0018651, GO:0018652, GO:0018653, GO:0018654, GO:0018655, GO:0018656, GO:0018657, GO:…	monooxygenase activity, iron ion binding, electron transport, heme binding, 3-(3-hydroxy-phenyl)propionate hydroxylase activity, 4-chlorobenzaldehyde oxidase activity, 3,5-xylenol methylhydroxylase activity, phenylacetate hydroxylase activity, 4-nitrophenol 4-monooxygenase activity, dimethyl sulfide monooxygenase activity, alpha-pinene monooxygenase [DH] activity, limonene 1,2-monooxygenase activ…	IPR002403, IPR001128	Cytochrome P450, E-class, group IV, Cytochrome P450	EP450IV, p450, CYTOCHROME_P450, Cytochrome P450	Q63688	25-hydroxycholesterol 7-alpha-hydroxylase (EC 1.14.13.100) (Cytochrome P450 7B1) (Hippocampal transcript 1 protein) (HCT-1) (Oxysterol 7-alpha-hydroxylase) (Fragment)	Cyp7b1	IPR001128, IPR002403	Cytochrome P450, Cytochrome P450, E-class, group IV	rno:25429	M2N4T6	IPR001128, IPR002403	Cytochrome P450, Cytochrome P450, E-class, group IV	XP_007678858.1		97.45	24.37	39.33	39.33
NOV_011729	Cluster1	3.25342	2.4088	2.13711	1.8056	2.40123	0.287701							A0A014MTN0	DDE superfamily endonuclease (Fragment)	X797_012441	IPR004875;IPR009057;IPR006600;IPR007889;				PF07733;PF14579;PF02811;					210					DOMAIN 49 119 HTH CENPB-type D-binding. {ECO:0000259|PROSITE:PS51253}.
gene4628	Cluster1	1.91585	1.91312	1.13441	4.63901	2.4006	1.77159	70242	GO:0005215, GO:0006810, GO:0016021	transporter activity, transport, integral to membrane	IPR011701, IPR007114, IPR016196	Major facilitator superfamily MFS-1, Major facilitator superfamily, MFS general substrate transporter	MFS_1, MFS, MFS general substrate transporter	O74923	Uncharacterized transporter C757.13	SPCC757.13	IPR011701, IPR020846	Major facilitator superfamily, Major facilitator superfamily domain	spo:SPCC757.13	L2GHH9	IPR011701, IPR020846	Major facilitator superfamily, Major facilitator superfamily domain	XP_007272800.1		93.49	31.54	69.53	69.53
gene9366	Cluster1	1.94514	3.08503	2.196	2.28502	2.3778	0.182256	103236	GO:0004553, GO:0005576, GO:0005975, GO:0030248, GO:0004568, GO:0008843	hydrolase activity, hydrolyzing O-glycosyl compounds, extracellular region, carbohydrate metabolic process, cellulose binding, chitinase activity, endochitinase activity	IPR000254, IPR001223, IPR001579, IPR017853	Cellulose-binding region, fungal, Glycoside hydrolase, family 18, catalytic domain, Glycoside hydrolase, chitinase active site, Glycoside hydrolase, catalytic core	Q7RW51_NEUCR_Q7RW51;, Glyco_hydro_18, CBM_1, no description, CBM1_2, CBM1_1, CHITISE_18, (Trans)glycosidases, Cellulose-binding domain	Q4U4T0	Endochitinase 2 (EC 3.2.1.14) (Chitinase 2)	chi2	IPR000254, IPR001223, IPR001579, IPR013781, IPR017853	Cellulose-binding domain, fungal, Glycoside hydrolase family 18, catalytic domain, Glycoside hydrolase, chitinase active site, Glycoside hydrolase, catalytic domain, Glycoside hydrolase superfamily		G9MFN2	IPR000254, IPR001223, IPR013781, IPR017853	Cellulose-binding domain, fungal, Glycoside hydrolase family 18, catalytic domain, Glycoside hydrolase, catalytic domain, Glycoside hydrolase superfamily	EHK26781.1		100	58.9	60.61	60.61
gene8604	Cluster1	1.39519	3.15646	3.02227	1.92969	2.37591	0.546989	73790						B1XX97	Phosphoribosyl-AMP cyclohydrolase (PRA-CH) (EC 3.5.4.19)	hisI Lcho_1611	IPR002496, IPR026660	Phosphoribosyl-AMP cyclohydrolase domain, Phosphoribosyl-AMP cyclohydrolase	lch:Lcho_1611	W2RKK3			XP_008721066.1		97.08	42.86	38.62	38.62
gene1219	Cluster1	2.37845	2.20671	1.27453	3.63938	2.37477	0.709507	58977	GO:0000272, GO:0008810	polysaccharide catabolic process, cellulase activity	IPR002594, IPR008985	Glycoside hydrolase, family 12, Concanavalin A-like lectin/glucanase	O94218_ASPAC_O94218;, Glyco_hydro_12, Concanavalin A-like lectins/glucanases	A2Q877	Probable xyloglucan-specific endo-beta-1,4-glucanase A (EC 3.2.1.151) (Xyloglucanase A) (Xyloglucanendohydrolase A)	xgeA An01g03340	IPR002594, IPR013319, IPR013320	Glycoside hydrolase, family 12, Glycoside hydrolase, family 11/12, Concanavalin A-like lectin/glucanase domain	ang:ANI_1_432014	B6SPU7	IPR002594, IPR013319, IPR013320	Glycoside hydrolase, family 12, Glycoside hydrolase, family 11/12, Concanavalin A-like lectin/glucanase domain	ACG26880.1		100	62.41	62.12	62.12
gene87	Cluster1	2.30354	2.4413	1.37373	3.37619	2.37369	0.503607	335419	GO:0010181, GO:0016491, GO:0016629	FMN binding, oxidoreductase activity, 12-oxophytodienoate reductase activity	IPR001155	DH:flavin oxidoreductase/DH oxidase, N-terminal	Oxidored_FMN	O94467	Putative DPH dehydrogenase C23G7.10c (EC 1.6.99.1) (Old yellow enzyme homolog 3)	SPBC23G7.10c	IPR001155, IPR013785	DH:flavin oxidoreductase/DH oxidase, N-terminal, Aldolase-type TIM barrel	spo:SPBC23G7.10c	R8BG41	IPR001155, IPR013785	DH:flavin oxidoreductase/DH oxidase, N-terminal, Aldolase-type TIM barrel	XP_007916967.1	XM_013468677.1	100	45.91	67.32	67.32	76.23
gene2340	Cluster1	2.54791	1.88911	1.86648	3.18862	2.37303	0.296635	269000	GO:0004871	signal transducer activity	IPR000342, IPR016137	Regulator of G protein signalling, Regulator of G protein signalling superfamily	Q6RG78_HORSE_Q6RG78;, RGS, no description, Regulator of G-protein signaling, RGS	Q9ST27	Phototropin-2 (EC 2.7.11.1) (Non-phototropic hypocotyl protein 1B) (OsNPH1B)	PHOT2 Os04g0304200 LOC_Os04g23890 OSJNBa0079M09.13	IPR000014, IPR000700, IPR000719, IPR001610, IPR002290, IPR008271, IPR011009, IPR017441	PAS domain, PAS-associated, C-terminal, Protein kinase domain, PAC motif, Serine/threonine/dual specificity protein kinase, catalytic domain, Serine/threonine-protein kinase, active site, Protein kinase-like domain, Protein kinase, ATP binding site	osa:4335426	L2FYR8	IPR000014, IPR001610, IPR016137	PAS domain, PAC motif, RGS domain	XP_007279659.1		100	53.33	84.42	84.42
NOV_000486	Cluster1	2.14421	2.24932	2.82294	2.26147	2.36948	0.0706196							A0A094IUK4	Uncharacterized protein	V500_01088	IPR003609;				PF02140;PF01301;					51.6					DOMAIN 29 103 Apple. {ECO:0000259|PROSITE:PS50948}.; DOMAIN 131 206 Apple. {ECO:0000259|PROSITE:PS50948}.; DOMAIN 234 272 Apple. {ECO:0000259|PROSITE:PS50948}.
gene2524	Cluster1	1.73441	2.93913	3.18834	1.61196	2.36846	0.493047	269811	GO:0009820, GO:0050364	alkaloid metabolic process, tryptophan dimethylallyltransferase activity	IPR012148, IPR017795	Tryptophan dimethylallyltransferase, Aromatic prenyltransferase, DMATS type	Tryptophan dimethylallyltransferase, arom_pren_DMATS: aromatic prenyltrans	Q6Q874	4-O-dimethylallyl-L-tyrosine synthase (EC 2.5.1.122)	sirD	IPR012148, IPR017795	Tryptophan dimethylallyltransferase, Aromatic prenyltransferase, DMATS type		W6QY29	IPR012148, IPR017795	Tryptophan dimethylallyltransferase, Aromatic prenyltransferase, DMATS type	CDM34457.1		94.46	28.51	44.35	44.35
gene8430	Cluster1	2.45222	2.45928	1.88691	2.67316	2.36789	0.0849997	293608	GO:0003824, GO:0005975, GO:0043169, GO:0047657	catalytic activity, carbohydrate metabolic process, cation binding, alpha-1,3-glucan synthase activity	IPR006047, IPR013534, IPR006589, IPR017853	Glycosyl hydrolase, family 13, catalytic region, Starch synthase catalytic region, Glycosyl hydrolase, family 13, subfamily, catalytic region, Glycoside hydrolase, catalytic core	Alpha-amylase, Glyco_transf_5, no description, (Trans)glycosidases	Q9Y719	Cell wall alpha-1,3-glucan synthase mok13 (EC 2.4.1.183)	mok13 SPBC16D10.05	IPR006047, IPR013534, IPR013781, IPR017853	Glycosyl hydrolase, family 13, catalytic domain, Starch synthase, catalytic domain, Glycoside hydrolase, catalytic domain, Glycoside hydrolase superfamily	spo:SPBC16D10.05	A0A066WZK5	IPR013534, IPR013781, IPR017853	Starch synthase, catalytic domain, Glycoside hydrolase, catalytic domain, Glycoside hydrolase superfamily	KDN62127.1	XM_003721396.1	98.76	81.32	92.86	92.86	81.27
NOV_007938	Cluster1	3.30966	2.44117	0.493794	3.19655	2.36029	1.27275							M3EAI3	GluD protein	SBD_4720	IPR010065;IPR000515;				PF00013;PF03726;PF01138;PF03725;PF00575;					35.8					DOMAIN 67 259 ABC transmembrane type-1. {ECO:0000259|PROSITE:PS50928}.
gene4703	Cluster1	2.31223	2.47324	1.89875	2.75163	2.35896	0.0953055	337702	GO:0005351, GO:0008643, GO:0016020, GO:0005215, GO:0006810, GO:0016021, GO:0008733	sugar:hydrogen symporter activity, carbohydrate transport, membrane, transporter activity, transport, integral to membrane, L-arabinose isomerase activity	IPR003663, IPR005828, IPR007114, IPR005829, IPR016196	Sugar transporter, General substrate transporter, Major facilitator superfamily, Sugar transporter, conserved site, MFS general substrate transporter	SUGRTRNSPORT, Sugar_tr, SP: MFS transporter, sugar porter (SP) famil, MFS, SUGAR_TRANSPORT_2, MFS general substrate transporter	P39932	Sugar transporter STL1	STL1 YDR536W D9719.39	IPR003663, IPR005828, IPR005829, IPR020846	Sugar/inositol transporter, Major facilitator, sugar transporter-like, Sugar transporter, conserved site, Major facilitator superfamily domain	sce:YDR536W	Q0CMX3	IPR003663, IPR005828, IPR005829, IPR020846	Sugar/inositol transporter, Major facilitator, sugar transporter-like, Sugar transporter, conserved site, Major facilitator superfamily domain	XP_001214139.1	XM_007842718.1	100	41.88	78.79	78.79	74.31
gene3824	Cluster1	2.4705	3.25127	2.27202	1.43897	2.35819	0.415646	65608	GO:0003824, GO:0005524	catalytic activity, ATP binding	IPR003806, IPR011761	ATP-grasp fold, DUF201-type, ATP-grasp fold	ATP-grasp_3, ATP_GRASP	Q6D4G3	Protease HtpX (EC 3.4.24.-) (Heat shock protein HtpX)	htpX ECA2427	IPR001915, IPR022919	Peptidase M48, Peptidase M48, protease HtpX, putative	eca:ECA2427	W3XA82	IPR003806, IPR011761	ATP-grasp fold, DUF201-type, ATP-grasp fold	XP_007834076.1		100	28.18	67.9	67.9
NOV_010739	Cluster1	2.65281	3.10626	1.91757	1.74228	2.35473	0.304964							Q52KR3	Protein prune homolog 2 (BNIP2 motif-containing molecule at the C-terminal region 1)	Prune2 Bmcc1 Kiaa0367	IPR022181;IPR001251;IPR004097;				PF00626;PF08033;PF04815;PF04811;PF04810;					32.3				apoptotic process [GO:0006915]	DOMAIN 2879 3040 CRAL-TRIO. {ECO:0000255|PROSITE-ProRule:PRU00056}.
gene5405	Cluster1	1.75949	1.91701	0.993881	4.74551	2.35397	2.02841	345789	GO:0016787, GO:0003824, GO:0017168	hydrolase activity, catalytic activity, 5-oxoprolinase (ATP-hydrolyzing) activity	IPR002821, IPR003692, IPR008040	Hydantoinase/oxoprolinase, Hydantoinase B/oxoprolinase, Hydantoinaseoxoprolinase, N-terminal	Hydantoinase_A, Hydantoinase_B, Hydant_A_N	Q10094	Uncharacterized protein C11D3.15	SPAC11D3.15	IPR002821, IPR003692, IPR008040	Hydantoinase/oxoprolinase, Hydantoinase B/oxoprolinase, Hydantoinaseoxoprolinase, N-terminal	spo:SPAC11D3.15	T0LEH8	IPR002821, IPR003692, IPR008040	Hydantoinase/oxoprolinase, Hydantoinase B/oxoprolinase, Hydantoinaseoxoprolinase, N-terminal	EQB49931.1	XM_008603275.1	100	63.04	76.3	76.3	84.52
gene3035	Cluster1	2.38517	2.54736	1.91726	2.55903	2.3522	0.0677809	327414		unknown_gene		unknown_gene			unknown_gene			unknown_gene		B2B2Q6		unknown_gene	XP_001910257.1		100		34	34
NOV_003182	Cluster1	2.96537	2.50794	1.86376	2.07041	2.35187	0.179553								unknown_gene	unknown_gene	unknown_gene				PF00814;, PF00385;									unknown_gene
gene118	Cluster1	1.18966	2.94662	3.63583	1.62735	2.34987	0.969486	29070	GO:0004672, GO:0005524, GO:0006468, GO:0004682	protein kinase activity, ATP binding, protein amino acid phosphorylation, protein kinase CK2 activity	IPR000719, IPR017442, IPR011009	Protein kinase, core, Serine/threonine protein kinase-related, Protein kinase-like	CDK8_DROME_Q9VT57;, Pkinase, PROTEIN_KISE_DOM, Protein kinase-like (PK-like)	Q9VT57	Cyclin-dependent kinase 8 (EC 2.7.11.22) (EC 2.7.11.23) (Cell division protein kinase 8) (DmCdk8) (Mediator complex subunit Cdk8) (Mediator of R polymerase II transcription subunit Cdk8)	Cdk8 CG10572	IPR000719, IPR002290, IPR008271, IPR011009, IPR017441	Protein kinase domain, Serine/threonine/dual specificity protein kinase, catalytic domain, Serine/threonine-protein kinase, active site, Protein kinase-like domain, Protein kinase, ATP binding site	dme:Dmel_CG10572	W9NYF0	IPR000719, IPR011009, IPR017441	Protein kinase domain, Protein kinase-like domain, Protein kinase, ATP binding site	EXK87558.1		100	37.5	45.86	45.86
gene8579	Cluster1	2.44346	2.62269	2.27587	2.05442	2.34911	0.0439886	263032						Q9ST27	Phototropin-2 (EC 2.7.11.1) (Non-phototropic hypocotyl protein 1B) (OsNPH1B)	PHOT2 Os04g0304200 LOC_Os04g23890 OSJNBa0079M09.13	IPR000014, IPR000700, IPR000719, IPR001610, IPR002290, IPR008271, IPR011009, IPR017441	PAS domain, PAS-associated, C-terminal, Protein kinase domain, PAC motif, Serine/threonine/dual specificity protein kinase, catalytic domain, Serine/threonine-protein kinase, active site, Protein kinase-like domain, Protein kinase, ATP binding site	osa:4335426	E4ZT66	IPR000014, IPR000700, IPR001610	PAS domain, PAS-associated, C-terminal, PAC motif	XP_003837941.1		100	49.32	76	76
gene1686	Cluster1	2.47583	2.06275	2.33594	2.49663	2.34279	0.0299583	67096		unknown_gene		unknown_gene			unknown_gene			unknown_gene				unknown_gene			100
gene4771	Cluster1	2.08193	2.66196	1.70973	2.9043	2.33948	0.221482	69071	GO:0005509	calcium ion binding	IPR002048	Calcium-binding EF-hand	EF_HAND_1							E5EYG5	IPR027417	P-loop containing nucleoside triphosphate hydrolase	YP_004009405.1		100		25.29	25.29
NOV_004529	Cluster1	2.06533	2.78124	1.93983	2.56086	2.33681	0.119752							A0A023PZB3, L8F821	Protein FMP49, mitochondrial (Found in mitochondrial proteome protein 49), Nitrilotriacetate monooxygenase component A (EC 1.14.13.-)	FMP49 YER038W-A, D806_4629	, IPR011251;IPR016215;				unknown_gene					31.2, 38.5				,	, DOMAIN 32 388 Bac_luciferase. {ECO:0000259|Pfam:PF00296}.
NOV_002678	Cluster1	2.03554	2.86696	2.44789	1.9896	2.335	0.126176								unknown_gene	unknown_gene	unknown_gene				PF00155;									unknown_gene
gene9827	Cluster1	2.23439	2.55363	2.38218	2.14921	2.32985	0.0236397	72668	GO:0004497, GO:0006118, GO:0006725, GO:0008152, GO:0016491, GO:0018662	monooxygenase activity, electron transport, aromatic compound metabolic process, metabolic process, oxidoreductase activity, phenol 2-monooxygenase activity	IPR013027, IPR003042, IPR002938	FAD-dependent pyridine nucleotide-disulphide oxidoreductase, Aromatic-ring hydroxylase, Monooxygenase, FAD-binding	FADPNR, RNGMNOXGSE, FAD_binding_3	O07561	Uncharacterized aromatic compound monooxygenase YhjG (EC 1.14.13.-)	yhjG BSU10500	IPR002938, IPR023753	FAD-binding domain, FAD/D(P)-binding domain	bsu:BSU10500	V5G4Z0	IPR002938, IPR023753	FAD-binding domain, FAD/D(P)-binding domain	GAD99518.1		100	31.36	38.1	38.1
gene7424	Cluster1	1.65871	2.44248	2.59858	2.60382	2.3259	0.152582	330472		unknown_gene		unknown_gene			unknown_gene			unknown_gene				unknown_gene			100
gene6291	Cluster1	2.43289	2.73507	3.18516	0.941035	2.32354	0.708755	68135						P44307	Ribosome-recycling factor (RRF) (Ribosome-releasing factor)	frr HI_0808	IPR002661, IPR023584	Ribosome recycling factor, Ribosome recycling factor domain	hin:HI0808	F0YD41			XP_009038299.1		75.69	34.48	26.09	26.09
gene6655	Cluster1	2.01785	2.44232	1.55226	3.25635	2.3172	0.393096	330216												R8BA42	IPR000073, IPR029058	Alpha/beta hydrolase fold-1, Alpha/Beta hydrolase fold	XP_007919100.1		100		50	50
gene5652	Cluster1	2.43329	2.59968	2.40811	1.82678	2.31697	0.0855129	339099	GO:0006865, GO:0015171, GO:0016020, GO:0006810	amino acid transport, amino acid transmembrane transporter activity, membrane, transport	IPR004841, IPR002293	Amino acid permease-associated region, Amino acid/polyamine transporter I	AA_permease, Amino acid transporter	P36029	Polyamine transporter TPO5	TPO5 YKL174C YKL639	IPR002293, IPR004840, IPR004841	Amino acid/polyamine transporter I, Amino acid permease, conserved site, Amino acid permease/ SLC12A domain	sce:YKL174C	E3S3A8	IPR002293	Amino acid/polyamine transporter I	XP_003304363.1		100	44	68.42	68.42
gene7067	Cluster1	2.20375	2.56377	2.02774	2.45979	2.31376	0.0444347	98428	GO:0005215, GO:0006810, GO:0016021	transporter activity, transport, integral to membrane	IPR011701, IPR007114, IPR016196	Major facilitator superfamily MFS-1, Major facilitator superfamily, MFS general substrate transporter	MFS_1, MFS, MFS general substrate transporter	Q08268	Probable transporter MCH4	MCH4 YOL119C	IPR011701, IPR020846	Major facilitator superfamily, Major facilitator superfamily domain	sce:YOL119C	R8BHH4	IPR011701, IPR020846	Major facilitator superfamily, Major facilitator superfamily domain	XP_007916417.1	XM_007918226.1	93.26	28.4	63.79	63.79	70.92
gene7616	Cluster1	2.42305	2.38661	2.12968	2.31411	2.31336	0.0127844	330844		unknown_gene		unknown_gene			unknown_gene			unknown_gene		R8BC54		unknown_gene	XP_007918355.1		100		40.7	40.7
gene198	Cluster1	2.30255	2.26558	2.30842	2.36133	2.30947	0.00116616	335584	GO:0016614, GO:0050660, GO:0006066, GO:0008812	oxidoreductase activity, acting on CH-OH group of donors, FAD binding, alcohol metabolic process, choline dehydrogenase activity	IPR000172, IPR007867, IPR012132	Glucose-methanol-choline oxidoreductase, N-terminal, Glucose-methanol-choline oxidoreductase, C-terminal, Glucose-methanol-choline oxidoreductase	GMC_oxred_N, GMC_oxred_C, Alcohol oxidase, GMC_OXRED_2	Q7X2H8	Choline oxidase (EC 1.1.3.17)	codA	IPR000172, IPR007867, IPR023753	Glucose-methanol-choline oxidoreductase, N-terminal, Glucose-methanol-choline oxidoreductase, C-terminal, FAD/D(P)-binding domain	ag:AAP68832	R8BHU0	IPR000172, IPR007867, IPR012132, IPR023753	Glucose-methanol-choline oxidoreductase, N-terminal, Glucose-methanol-choline oxidoreductase, C-terminal, Glucose-methanol-choline oxidoreductase, FAD/D(P)-binding domain	XP_007916356.1	XM_008094043.1	100	40.47	78.01	78.01	81.69
gene7537	Cluster1	2.11754	2.46016	2.48599	2.17265	2.30909	0.0273559	258862			IPR010730	Heterokaryon incompatibility	HET							W1I9Y2	IPR010730	Heterokaryon incompatibility - vic1a	CDL70792.1		100		100	100
NOV_009062	Cluster1	1.4302	3.45004	2.31833	2.03324	2.30795	0.537596							Q6LMR1	tR-modifying protein YgfZ	PBPRA3100	IPR029043;IPR023758;IPR017703;				PF09290;PF01118;,					35.8				R modification [GO:0009451]; tR processing [GO:0008033]
gene2736	Cluster1	2.9406	2.51701	2.06022	1.70531	2.30578	0.21712	320858						P45968	Chromo domain-containing protein cec-3	cec-3 T09A5.8	IPR000953, IPR016197, IPR023779, IPR023780	Chromo/chromo shadow domain, Chromo domain-like, Chromo domain, conserved site, Chromo domain	cel:CELE_T09A5.8	L2GIS6	IPR000953, IPR001584, IPR012337, IPR016197, IPR023780	Chromo/chromo shadow domain, Integrase, catalytic core, Ribonuclease H-like domain, Chromo domain-like, Chromo domain	XP_007272770.1		87.3	41.79	45.1	45.1
gene4098	Cluster1	2.35676	2.32628	1.82708	2.70268	2.3032	0.097421	40189	GO:0003700, GO:0005634, GO:0006355, GO:0008270	transcription factor activity, nucleus, regulation of transcription, D-dependent, zinc ion binding	IPR001138	Fungal transcriptional regulatory protein, N-terminal	FUNGALZNCYS, Zn_clus, no description, ZN2_CY6_FUNGAL_2, ZN2_CY6_FUNGAL_1, Zn2/Cys6 D-binding domain	O59741	Uncharacterized transcriptional regulatory protein C530.05	SPBC530.05	IPR001138, IPR007219	Zn(2)-C6 fungal-type D-binding domain, Transcription factor domain, fungi	spo:SPBC530.05	A0A084R3U9	IPR001138, IPR007219	Zn(2)-C6 fungal-type D-binding domain, Transcription factor domain, fungi	KFA70884.1		100	47.83	69.57	69.57
gene8448	Cluster1	1.88961	2.38796	2.21148	2.71157	2.30015	0.0883455	51078						Q01815	Voltage-dependent L-type calcium channel subunit alpha-1C (Calcium channel, L type, alpha-1 polypeptide, isoform 1, cardiac muscle) (MELC-CC) (Mouse brain class C) (MBC) (Voltage-gated calcium channel subunit alpha Cav1.2)	Cacna1c Cach2 Cacn2 Cacnl1a1 Cchl1a1	IPR002077, IPR005446, IPR005451, IPR005821, IPR014873, IPR027359, IPR031649, IPR031688	Voltage-dependent calcium channel, alpha-1 subunit, Voltage-dependent calcium channel, L-type, alpha-1 subunit, Voltage-dependent calcium channel, L-type, alpha-1C subunit, Ion transport domain, Voltage-dependent calcium channel, alpha-1 subunit, IQ domain, Voltage-dependent channel, four helix bundle domain, Voltage-dependent L-type calcium channel, IQ-associated domain, Voltage-gated calcium ch…	mmu:12288	F9XCU2	IPR010828, IPR011118	Alcohol acetyltransferase, Tannase/feruloyl esterase	XP_003851933.1		100	29.82	37.3	37.3
gene11283	Cluster1	1.95158	2.60169	1.35755	3.28184	2.29816	0.516156	353416	GO:0003824, GO:0005488, GO:0008152, GO:0019166	catalytic activity, binding, metabolic process, trans-2-enoyl-CoA reductase (DPH) activity	IPR013149, IPR013154, IPR011032, IPR016040	Alcohol dehydrogenase, zinc-binding, Alcohol dehydrogenase GroES-like, GroES-like, D(P)-binding	ADH_zinc_N, ADH_N, GroES-like, D(P)-binding Rossmann-fold domains	Q99536	Synaptic vesicle membrane protein VAT-1 homolog (EC 1.-.-.-)	VAT1	IPR002085, IPR002364, IPR011032, IPR013149, IPR013154, IPR016040	Alcohol dehydrogenase superfamily, zinc-type, Quinone oxidoreductase/zeta-crystallin, conserved site, GroES-like, Alcohol dehydrogenase, C-terminal, Alcohol dehydrogenase, N-terminal, D(P)-binding domain	hsa:10493	W9ZQ88	IPR002085, IPR011032, IPR013149, IPR013154, IPR016040	Alcohol dehydrogenase superfamily, zinc-type, GroES-like, Alcohol dehydrogenase, C-terminal, Alcohol dehydrogenase, N-terminal, D(P)-binding domain	EXK30473.1		100	28.94	43.18	43.18
gene517	Cluster1	2.10921	2.09278	1.09588	3.89468	2.29814	1.01805	349195	GO:0006808, GO:0016564, GO:0003824, GO:0005488, GO:0008152	regulation of nitrogen utilization, transcription repressor activity, catalytic activity, binding, metabolic process	IPR008030, IPR016040	NmrA-like, D(P)-binding	NmrA, D(P)-binding Rossmann-fold domains	Q67PC6	Methylenetetrahydrofolate--tR-(uracil-5-)-methyltransferase TrmFO (EC 2.1.1.74) (Folate-dependent tR (uracil-5-)-methyltransferase) (Folate-dependent tR(M-5-U54)-methyltransferase)	trmFO gid STH1482	IPR002218, IPR004417, IPR020595, IPR023753	tR uridine 5-carboxymethylaminomethyl modification enzyme MnmG-related, Methylenetetrahydrofolate--tR-(uracil-5-)-methyltransferase TrmFO, MnmG-related, conserved site, FAD/D(P)-binding domain	sth:STH1482	W9JDP6	IPR008030, IPR016040	NmrA-like domain, D(P)-binding domain	EWZ27785.1		92.68	35.71	41.5	41.5
gene11587	Cluster1	2.13927	2.7351	1.87244	2.43307	2.29497	0.103888	93998	GO:0004104	cholinesterase activity	IPR002018	Carboxylesterase, type B	COesterase, CARBOXYLESTERASE_B_1, CARBOXYLESTERASE_B_2	P17573	Lipase 1 (EC 3.1.1.3) (GCL I) (Lipase I)	LIP1	IPR002018, IPR019819, IPR019826, IPR029058	Carboxylesterase, type B, Carboxylesterase type B, conserved site, Carboxylesterase type B, active site, Alpha/Beta hydrolase fold		W3X719	IPR002018, IPR019819, IPR019826, IPR029058	Carboxylesterase, type B, Carboxylesterase type B, conserved site, Carboxylesterase type B, active site, Alpha/Beta hydrolase fold	XP_007833682.1	XM_006965543.1	100	36.12	63.33	63.33	79.25
gene9339	Cluster1	2.15853	2.63062	2.47605	1.90647	2.29292	0.0787435	264067	GO:0020037, GO:0046914, GO:0016491, GO:0006629, GO:0016020, GO:0016717, GO:0005506, GO:0006633, GO:0016213	heme binding, transition metal ion binding, oxidoreductase activity, lipid metabolic process, membrane, oxidoreductase activity, acting on paired donors, with oxidation of a pair of donors resulting in the reduction of molecular oxygen to two molecules of water, iron ion binding, fatty acid biosynthetic process, linoleoyl-CoA desaturase activity	IPR001199, IPR010257, IPR005804, IPR012171	Cytochrome b5, Fatty acid desaturase, type 1, N-terminal, Fatty acid desaturase, type 1, Fatty acid/sphingolipid desaturase	Q9Z122_RAT_Q9Z122;, Q7S476_NEUCR_Q7S476;, Cyt-b5, FA_desaturase, Fatty acid desaturase/sphingolipid desaturase, CYTOCHROME_B5_2, Cytochrome b5-like heme/steroid binding domain	Q6CMK7	Delta(8)-fatty-acid desaturase (EC 1.14.19.4) (Delta(8)-sphingolipid desaturase)	SLD KLLA0E19471g	IPR001199, IPR005804, IPR012171	Cytochrome b5-like heme/steroid binding domain, Fatty acid desaturase domain, Fatty acid desaturase	kla:KLLA0E19471g	R1EUZ1	IPR001199, IPR005804, IPR012171	Cytochrome b5-like heme/steroid binding domain, Fatty acid desaturase domain, Fatty acid desaturase	XP_007581109.1	XM_007581047.1	100	54.39	82.27	82.27	80.3
NOV_009704	Cluster1	1.77028	3.00362	2.80533	1.58884	2.29202	0.384133							A0A086T580	Ubiquitin-conjugating enzyme E2 Z-like protein	ACRE_046850	IPR000608;IPR016135;				PF14318;PF00946;					45.4					DOMAIN 8 131 UBIQUITIN_CONJUGAT_2. {ECO:0000259|PROSITE:PS50127}.; DOMAIN 313 424 UBIQUITIN_CONJUGAT_2. {ECO:0000259|PROSITE:PS50127}.
gene6012	Cluster1	2.64174	2.894	2.41733	1.20367	2.28918	0.421214	339678	GO:0004497, GO:0005506, GO:0006118, GO:0020037	monooxygenase activity, iron ion binding, electron transport, heme binding	IPR001128, IPR002401	Cytochrome P450, Cytochrome P450, E-class, group I	P450, EP450I, p450, CYTOCHROME_P450, Cytochrome P450	Q12609	Probable sterigmatocystin biosynthesis P450 monooxygenase stcF (EC 1.14.-.-) (Cytochrome P450 60A2)	stcF cyp60A2 AN7818	IPR001128, IPR002401, IPR017972	Cytochrome P450, Cytochrome P450, E-class, group I, Cytochrome P450, conserved site	ani:AN7818.2	F7VVP4	IPR001128, IPR002401, IPR017972	Cytochrome P450, Cytochrome P450, E-class, group I, Cytochrome P450, conserved site	XP_003351312.1		99.63	59.46	64.15	64.15
gene7173	Cluster1	3.50358	0.505649	1.26589	3.87983	2.28874	2.05827	322751		unknown_gene		unknown_gene			unknown_gene			unknown_gene		R8BC55		unknown_gene	XP_007918427.1		100		60.71	60.71
gene8329	Cluster1	2.03154	2.40091	2.93285	1.78707	2.28809	0.186323	74249						Q5F371	Protein strawberry notch homolog 1	SBNO1 RCJMB04_30k7	IPR026741, IPR026937, IPR027417	Protein strawberry notch, Strawberry notch, helicase C domain, P-loop containing nucleoside triphosphate hydrolase	gga:427694	K4F7R6			YP_006987537.1		100	48	34.9	34.9
NOV_007454	Cluster1	2.9465	1.24711	2.34598	2.60538	2.28624	0.405286								unknown_gene	unknown_gene	unknown_gene				PF05730;, PF05730;									unknown_gene
gene11271	Cluster1	1.41607	1.9895	1.94576	3.77463	2.28149	0.794099	268419			IPR010730	Heterokaryon incompatibility	HET	Q00808	Vegetative incompatibility protein HET-E-1	HET-E1	IPR001680, IPR007111, IPR010730, IPR015943, IPR017986, IPR019775, IPR020472, IPR027417	WD40 repeat, CHT nucleoside triphosphatase, Heterokaryon incompatibility, WD40/YVTN repeat-like-containing domain, WD40-repeat-containing domain, WD40 repeat, conserved site, G-protein beta WD-40 repeat, P-loop containing nucleoside triphosphate hydrolase		A0A094GDJ1	IPR010730	Heterokaryon incompatibility	KFZ01110.1		100	28.72	36.05	36.05
gene6901	Cluster1	2.52042	2.48203	2.17058	1.9475	2.28013	0.0552864	260524	GO:0005215, GO:0006810, GO:0016020	transporter activity, transport, membrane	IPR005829	Sugar transporter, conserved site	SUGAR_TRANSPORT_1							B6QFT6	IPR000073, IPR029058	Alpha/beta hydrolase fold-1, Alpha/Beta hydrolase fold	XP_002147832.1		100		51.76	51.76
gene3427	Cluster1	2.23465	2.40407	2.20258	2.2786	2.27997	0.00586178	71538		unknown_gene		unknown_gene			unknown_gene			unknown_gene				unknown_gene			100
gene5963	Cluster1	2.09144	1.90032	1.77859	3.34623	2.27914	0.39199	68736						Q9BM95	Sex-regulated protein janus-B	janB	IPR007702	Janus						XM_002911384.1	100	36.96			100
gene4512	Cluster1	2.07345	2.65598	1.48104	2.88723	2.27442	0.29774	355759		unknown_gene		unknown_gene			unknown_gene			unknown_gene		M4G9J7		unknown_gene	XP_009218594.1		100		44.03	49.25
gene2703	Cluster1	2.39849	2.46377	2.47822	1.74416	2.27116	0.0934772	240293						Q4V8C3	Echinoderm microtubule-associated protein-like 1 (EMAP-1)	Eml1	IPR001680, IPR005108, IPR011047, IPR015943, IPR017986, IPR019775	WD40 repeat, HELP, Quinoprotein alcohol dehydrogenase-like superfamily, WD40/YVTN repeat-like-containing domain, WD40-repeat-containing domain, WD40 repeat, conserved site	rno:362783	T5ABE5			EQK99913.1		100	40	59.37	59.37
gene2275	Cluster1	1.821	2.4727	1.14895	3.63252	2.26879	0.838971	269678	GO:0003824, GO:0005488, GO:0008152, GO:0004022, GO:0004023, GO:0004024, GO:0004025	catalytic activity, binding, metabolic process, alcohol dehydrogenase activity, alcohol dehydrogenase activity, metal ion-independent, alcohol dehydrogenase activity, zinc-dependent, alcohol dehydrogenase activity, iron-dependent	IPR013149, IPR013154, IPR011032, IPR016040	Alcohol dehydrogenase, zinc-binding, Alcohol dehydrogenase GroES-like, GroES-like, D(P)-binding	ADH_zinc_N, ADH_N, GroES-like, D(P)-binding Rossmann-fold domains	P54006	Protein TOXD	TOXD	IPR002085, IPR011032, IPR016040	Alcohol dehydrogenase superfamily, zinc-type, GroES-like, D(P)-binding domain		E3VL80	IPR002085, IPR011032, IPR013149, IPR013154, IPR016040	Alcohol dehydrogenase superfamily, zinc-type, GroES-like, Alcohol dehydrogenase, C-terminal, Alcohol dehydrogenase, N-terminal, D(P)-binding domain	XP_007814535.1		100	62.86	65.96	65.96
NOV_013714	Cluster1	2.45577	2.36808	1.81194	2.39386	2.25741	0.0671636							C4YDI6	Cell division control protein 42 homolog	CDC42 CAWG_00581	IPR027417;IPR005225;IPR001806;									32.7				cell cycle [GO:0007049]; cell division [GO:0051301]; pathogenesis [GO:0009405]; small GTPase mediated signal transduction [GO:0007264]
gene1182	Cluster1	2.28505	2.50686	1.66727	2.55675	2.25398	0.125202	66163												X0BGE8	IPR011009	Protein kinase-like domain	EXK77923.1		94.1		40.65	40.65
gene8723	Cluster1	1.80713	2.5432	1.22487	3.4381	2.25333	0.686132	357062												C7ZG78	IPR018531, IPR027369	Domain of unknown function DUF1993, DinB/YfiT-like putative metal-dependent hydrolase	XP_003042830.1		100		53.06	53.06
gene1687	Cluster1	2.36145	1.97633	2.2422	2.41459	2.24864	0.028615	354539		unknown_gene		unknown_gene			unknown_gene			unknown_gene				unknown_gene	WP_010961410.1		100		38.1
gene8538	Cluster1	1.48162	3.11461	2.16333	2.22835	2.24698	0.336473	262235	GO:0004497, GO:0005506, GO:0006118, GO:0020037	monooxygenase activity, iron ion binding, electron transport, heme binding	IPR001128, IPR002403	Cytochrome P450, Cytochrome P450, E-class, group IV	P450, EP450IV, p450, Cytochrome P450	Q9VQD2	Probable cytochrome P450 309a1 (EC 1.14.-.-) (CYPCCCIXA1)	Cyp309a1 CG9964	IPR001128, IPR002401, IPR017972	Cytochrome P450, Cytochrome P450, E-class, group I, Cytochrome P450, conserved site	dme:Dmel_CG9964	M7TPR8	IPR001128, IPR002401	Cytochrome P450, Cytochrome P450, E-class, group I	XP_007789004.1		97.6	28.12	48.74	48.74
gene4595	Cluster1	2.14604	2.30912	1.88626	2.63763	2.24476	0.0741885	355831	GO:0006950, GO:0016021	response to stress, integral to membrane	IPR007568	RTA1 like protein	RTA1	C8ZI10	Sphingoid long-chain base transporter RSB1	RSB1 EC1118_1O4_2476g	IPR007568	RTA-like protein		S7ZJX2	IPR007568	RTA-like protein	EPS28981.1		85.25	29.18	46.36	46.36
NOV_002796	Cluster1	1.64991	2.35158	1.50963	3.4583	2.24235	0.594583							Q7G9E7, W4WC98	Putative F-box protein At1g52480, Deleted.	At1g52480 F6D8.30,	IPR017451;IPR001810;,				PF07288;, PF00480;					31.2, 38.1				,	DOMAIN 12 59 F-box. {ECO:0000255|PROSITE-ProRule:PRU00080}.,
gene7999	Cluster1	1.11523	2.49877	2.22664	3.12036	2.24025	0.526822	73658						Q3KHV3	Homogentisate 1,2-dioxygenase (HGDO) (EC 1.13.11.5) (Homogentisate oxygenase) (Homogentisic acid oxidase) (Homogentisicase)	hmgA Pfl01_0910	IPR005708, IPR011051, IPR014710, IPR022950	Homogentisate 1,2-dioxygenase, RmlC-like cupin domain, RmlC-like jelly roll fold, Homogentisate 1,2-dioxygenase, bacterial	pfo:Pfl01_0910	A0A084R4K1	IPR009799, IPR011008	EthD domain, Dimeric alpha-beta barrel	KEY72284.1		100	33.33	70.97	70.97
gene7286	Cluster1	1.09992	2.04419	2.26586	3.53801	2.237	0.755893	322861		unknown_gene		unknown_gene			unknown_gene			unknown_gene				unknown_gene			100
gene6764	Cluster1	2.04563	2.58187	3.05341	1.2624	2.23583	0.44298	238641			IPR010730	Heterokaryon incompatibility	HET	Q1D8Y1	Glutamate--tR ligase (EC 6.1.1.17) (Glutamyl-tR synthetase) (GluRS)	gltX MXAN_2675	IPR000924, IPR001412, IPR004527, IPR008925, IPR014729, IPR020058, IPR020061, IPR020751, IPR020752	Glutamyl/glutaminyl-tR synthetase, Aminoacyl-tR synthetase, class I, conserved site, Glutamate-tR ligase, bacterial/mitochondrial, Aminoacyl-tR synthetase, class I, anticodon-binding, Rossmann-like alpha/beta/alpha sandwich fold, Glutamyl/glutaminyl-tR synthetase, class Ib, catalytic domain, Glutamyl/glutaminyl-tR synthetase, class Ib, alpha-bundle domain, Aminoacyl-tR synthetase, class I, antico…	mxa:MXAN_2675	S3CXC9	IPR000719, IPR010730, IPR011009	Protein kinase domain, Heterokaryon incompatibility, Protein kinase-like domain	XP_008082408.1		100	24.44	56.52	56.52
gene3407	Cluster1	2.91282	2.58291	2.15648	1.28521	2.23435	0.372185	62658						B5YJ65	GTPase Obg (EC 3.6.5.-) (GTP-binding protein Obg)	obg THEYE_A0433	IPR005225, IPR006073, IPR006074, IPR006169, IPR014100, IPR027417, IPR031167	Small GTP-binding protein domain, GTP binding domain, GTP1/OBG, conserved site, GTP1/OBG domain, GTP-binding protein Obg/CgtA, P-loop containing nucleoside triphosphate hydrolase, OBG-type guanine nucleotide-binding (G) domain	tye:THEYE_A0433	M2RSG2	IPR009057	Homeodomain-like	XP_007706123.1		76.58	48.48	39.29	39.29
NOV_011345	Cluster1	1.60371	2.60178	1.36429	3.3619	2.23292	0.640273							O15442, J5JUD4	Metallophosphoesterase domain-containing protein 1 (EC 3.1.-.-) (Adult brain protein 239) (239AB), Metallophosphoesterase domain-containing protein 2	MPPED1 C22orf1 FAM1A, BBA_05107	IPR024201;IPR004843;IPR029052;, IPR004843;IPR029052;				PF00173;PF00487;, PF00173;PF00487;					102, 395				,	, DOMAIN 27 215 Metallophos. {ECO:0000259|Pfam:PF00149}.
gene7702	Cluster1	1.97362	2.56477	2.14802	2.23141	2.22945	0.0461309	340244						P82289	Fatty acid-binding protein, liver (Fatty acid-binding protein 1) (Liver basic fatty acid-binding protein) (Lb-FABP) (Liver basic FABP) (Liver-type fatty acid-binding protein) (L-FABP)	fabp1	IPR000463, IPR011038, IPR012674, IPR031259, IPR031276	Cytosolic fatty-acid binding, Calycin-like, Calycin, Intracellular lipid binding protein, Liver basic fatty acid-binding protein		R8BGA0			XP_007916882.1		100	42.31	41.77	41.77
gene8517	Cluster1	1.59417	2.09973	2.60765	2.60117	2.22568	0.175391	292619	GO:0003824, GO:0005488, GO:0008152	catalytic activity, binding, metabolic process	IPR016040	D(P)-binding	D(P)-binding Rossmann-fold domains	Q6UEF2	Oxidoreductase AflX (EC 1.-.-.-) (Aflatoxin biosynthesis protein X)	aflX	IPR008030, IPR016040	NmrA-like domain, D(P)-binding domain		B6Q4V3	IPR008030, IPR016040	NmrA-like domain, D(P)-binding domain	XP_002144857.1		100	45.56	66.03	66.03
gene5402	Cluster1	2.04429	2.5996	2.53336	1.71976	2.22425	0.130832	70236		unknown_gene		unknown_gene			unknown_gene			unknown_gene		C5JDL1		unknown_gene	XP_002629199.1		100		24.92	24.92
gene6254	Cluster1	1.6968	2.98943	2.52406	1.68019	2.22262	0.312394	38649			IPR009939	Fungal chitosanase	Chitosanase	Q4WB37	Endo-chitosanase (EC 3.2.1.132)	csn AFUA_8G00930	IPR009939	Fungal chitosanase	afm:AFUA_8G00930	G2QLS9	IPR009939	Fungal chitosanase	XP_003666154.1		100	41.61	51.94	51.94
gene8228	Cluster1	3.08438	2.95513	2.42335	0.406661	2.21738	1.15427	331995						A9H1G5	Phosphatidylserine decarboxylase proenzyme (EC 4.1.1.65) [Cleaved into: Phosphatidylserine decarboxylase alpha chain; Phosphatidylserine decarboxylase beta chain]	psd GDI3308 Gdia_3062	IPR003817	Phosphatidylserine decarboxylase-related	gdj:Gdia_3062, gdi:GDI3308	N4VXI7			ENH88712.1		69.49	32.79	37.79	37.79
gene9652	Cluster1	2.13915	2.56329	2.02724	2.10592	2.2089	0.0435155	264227						Q7FMW4	ABC transporter G family member 38 (OsABCG38) (Pleiotropic drug resistance protein 15) (OsPDR15)	ABCG38 PDR15 Os01g0724500 LOC_Os01g52560 P0022F10.18	IPR003439, IPR003593, IPR013525, IPR013581, IPR027417, IPR029481	ABC transporter-like, AAA+ ATPase domain, ABC-2 type transporter, Plant PDR ABC transporter associated, P-loop containing nucleoside triphosphate hydrolase, ABC-transporter extracellular N-terminal domain	osa:4324722	G2R7U7			XP_003654342.1		100	33.33	54.95	54.95
gene10896	Cluster1	1.296	2.76063	0.292142	4.46298	2.20294	2.47313	358233	GO:0003824, GO:0005488, GO:0008152	catalytic activity, binding, metabolic process	IPR016040	D(P)-binding	D(P)-binding Rossmann-fold domains	Q00791	Versicolorin reductase (EC 1.1.-.-)	stcU verA AN7806	IPR002198, IPR002347, IPR016040, IPR020904	Short-chain dehydrogenase/reductase SDR, Glucose/ribitol dehydrogenase, D(P)-binding domain, Short-chain dehydrogenase/reductase, conserved site	ani:AN7806.2	N4XTF3	IPR016040	D(P)-binding domain	EMD90163.1		83.57	30.77	38.04	38.04
gene10842	Cluster1	1.90654	1.69936	2.89068	2.3025	2.19977	0.206077	295808						B2J3P0	D ligase (EC 6.5.1.2) (Polydeoxyribonucleotide synthase [D(+)])	ligA Npun_F0173	IPR001357, IPR001679, IPR003583, IPR004149, IPR004150, IPR010994, IPR012340, IPR013839, IPR013840, IPR018239	BRCT domain, D-dependent D ligase, Helix-hairpin-helix D-binding motif, class 1, Zinc-finger, D-dependent D ligase C4-type, D-dependent D ligase, OB-fold, RuvA domain 2-like, Nucleic acid-binding, OB-fold, D-dependent D ligase, adenylation, D-dependent D ligase, N-terminal, D-dependent D ligase, active site	npu:Npun_F0173	A0A086TDA6	IPR027417	P-loop containing nucleoside triphosphate hydrolase	KFH47338.1		100	29.01	42.21	42.21
gene11541	Cluster1	2.0253	2.22655	1.73848	2.78448	2.1937	0.146424	268342						Q8S8S9	Methylesterase 1 (AtMES1) (EC 3.1.1.-)	MES1 At2g23620 F26B6.27	IPR000073, IPR029058	Alpha/beta hydrolase fold-1, Alpha/Beta hydrolase fold	ath:AT2G23620	M7T4R2	IPR000073, IPR029058, IPR029063	Alpha/beta hydrolase fold-1, Alpha/Beta hydrolase fold, S-adenosyl-L-methionine-dependent methyltransferase	XP_007789338.1		100	24	63.22	63.22
gene10344	Cluster1	1.40248	2.36842	3.42314	1.57417	2.19205	0.637974	15980			IPR013658	SMP-30/Gluconolaconase/LRE-like region	SGL	Q01578	Gluconolactonase (EC 3.1.1.17) (D-glucono-delta-lactone lactonohydrolase) [Cleaved into: Gluconolactonase; Gluconolactonase minor isoform]	gnl ZMO1649	IPR005511, IPR006311, IPR011042, IPR013658	Senescence marker protein-30 (SMP-30), Twin-arginine translocation pathway, signal sequence, Six-bladed beta-propeller, TolB-like, SMP-30/Gluconolactonase/LRE-like region	zmo:ZMO1649	K2RHJ5	IPR011042, IPR013658	Six-bladed beta-propeller, TolB-like, SMP-30/Gluconolactonase/LRE-like region	EKG14043.1		100	32.38	72	72
gene10603	Cluster1	2.24241	2.00037	1.73633	2.78874	2.19196	0.150749	64791	GO:0005351, GO:0008643, GO:0016020, GO:0005215, GO:0006810, GO:0016021, GO:0008733	sugar:hydrogen symporter activity, carbohydrate transport, membrane, transporter activity, transport, integral to membrane, L-arabinose isomerase activity	IPR003663, IPR005828, IPR007114, IPR005829, IPR016196	Sugar transporter, General substrate transporter, Major facilitator superfamily, Sugar transporter, conserved site, MFS general substrate transporter	SUGRTRNSPORT, Sugar_tr, SP: MFS transporter, sugar porter (SP) famil, MFS, SUGAR_TRANSPORT_1, SUGAR_TRANSPORT_2, MFS general substrate transporter	A2QQV6	Probable quinate permease (Quinate transporter)	qutD An08g03850	IPR003663, IPR005828, IPR005829, IPR020846	Sugar/inositol transporter, Major facilitator, sugar transporter-like, Sugar transporter, conserved site, Major facilitator superfamily domain	ang:ANI_1_1882074	H1V5E3	IPR003663, IPR005828, IPR005829, IPR020846	Sugar/inositol transporter, Major facilitator, sugar transporter-like, Sugar transporter, conserved site, Major facilitator superfamily domain	CCF35445.1	XM_001216406.1	100	72.12	83.04	83.04	76.94
gene9803	Cluster1	2.09593	2.05034	2.41511	2.19421	2.1889	0.0197603	294404						P44565	2-succinylbenzoate--CoA ligase (EC 6.2.1.26) (o-succinylbenzoyl-CoA synthetase) (OSB-CoA synthetase)	menE HI_0194	IPR000873, IPR010192, IPR020845, IPR025110	AMP-dependent synthetase/ligase, 2-succinylbenzoate--CoA ligase, AMP-binding, conserved site, AMP-binding enzyme C-terminal domain	hin:HI0194	C7YTD4			XP_003050313.1		100	39.53	41.42	41.42
gene7885	Cluster1	2.17032	2.45799	1.8448	2.27685	2.18749	0.0497209	340529	GO:0003824, GO:0005488, GO:0008152	catalytic activity, binding, metabolic process	IPR016040	D(P)-binding	D(P)-binding Rossmann-fold domains	Q7NJM6	Bifunctional pantoate ligase/cytidylate kinase [Includes: Pantoate--beta-alanine ligase (EC 6.3.2.1) (Pantoate-activating enzyme) (Pantothenate synthetase); Cytidylate kinase (CK) (EC 2.7.4.14) (Cytidine monophosphate kinase) (CMP kinase)]	panC/cmk gll1806	IPR003136, IPR003721, IPR011994, IPR014729, IPR024894, IPR027417	Cytidylate kinase, Pantoate-beta-alanine ligase, Cytidylate kinase domain, Rossmann-like alpha/beta/alpha sandwich fold, Bifunctional pantoate ligase/cytidylate kinase, P-loop containing nucleoside triphosphate hydrolase	gvi:gll1806	A0A093Y790	IPR016040	D(P)-binding domain	KFY00871.1		100	48.94	64.56	64.56
gene5082	Cluster1	2.19688	2.72655	2.48662	1.31988	2.18248	0.2832	252144	GO:0008610, GO:0008825	lipid biosynthetic process, cyclopropane-fatty-acyl-phospholipid synthase activity	IPR003333	Cyclopropane-fatty-acyl-phospholipid synthase	CMAS, Fatty-acyl-phospholipid/mycolic acid cyclopropane synthase	P31049	Probable fatty acid methyltransferase (EC 2.1.1.-) (ORF3) (S-adenosylmethionine-dependent methyltransferase) (AdoMet-MT) (SAM-MT)		IPR003333, IPR029063	Mycolic acid cyclopropane synthase, S-adenosyl-L-methionine-dependent methyltransferase		G2XJ14	IPR029063	S-adenosyl-L-methionine-dependent methyltransferase	XP_009658267.1	XM_007913175.1	99.55	40.35	88.89	88.89	83.46
gene6702	Cluster1	2.20194	2.02332	2.52072	1.98188	2.18197	0.0450892	68816						P52111	Glycerol-3-phosphate dehydrogenase (EC 1.1.5.3)	glpD PA3584	IPR000447, IPR006076, IPR023753, IPR031656	FAD-dependent glycerol-3-phosphate dehydrogenase, FAD dependent oxidoreductase, FAD/D(P)-binding domain, Alpha-glycerophosphate oxidase, C-terminal	pae:PA3584	M9MCL5	IPR001619, IPR027121, IPR027482	Sec1-like protein, Vacuolar protein sorting-associated protein 33, Sec1-like, domain 2	GAC71852.1		100	37.93	41.38	41.38
gene9029	Cluster1	2.2996	2.14726	1.87249	2.40244	2.18045	0.0398542	357300			IPR013096, IPR011051	Cupin 2, conserved barrel, Cupin, RmlC-type	Cupin_2, RmlC-like cupins	Q8PVV3	Dihydromethanopterin reductase (acceptor) (H(2)MPT reductase) (EC 1.5.99.15)	dmrX MM_1854	IPR003382, IPR014073, IPR017896, IPR017900	Flavoprotein, Archaeal dihydromethanopterin reductase, 4Fe-4S ferredoxin-type, iron-sulphur binding domain, 4Fe-4S ferredoxin, iron-sulphur binding, conserved site	mma:MM_1854	W9CB72	IPR011051, IPR013096, IPR014710	RmlC-like cupin domain, Cupin 2, conserved barrel, RmlC-like jelly roll fold	ESZ93997.1		100	34.78	46.98	46.98
gene4678	Cluster1	2.07567	2.44819	1.47458	2.71839	2.17921	0.217572	355334	GO:0003824	catalytic activity	IPR000639, IPR000073	Epoxide hydrolase-like, Alpha/beta hydrolase fold-1	EPOXHYDRLASE, Abhydrolase_1	O05235	Uncharacterized hydrolase YugF (EC 3.1.-.-)	yugF BSU31420	IPR000073, IPR000639, IPR013595, IPR029058	Alpha/beta hydrolase fold-1, Epoxide hydrolase-like, Peptidase S33 tripeptidyl aminopeptidase-like, C-terminal, Alpha/Beta hydrolase fold	bsu:BSU31420	N1S898	IPR000073, IPR029058	Alpha/beta hydrolase fold-1, Alpha/Beta hydrolase fold	EMT74424.1		100	24.33	48.12	48.12
gene3751	Cluster1	2.18404	2.17064	2.56517	1.77475	2.17365	0.0781314	273760						Q6A085	Zinc finger protein 629	Znf629 Kiaa0326 Zfp629	IPR007087, IPR013087, IPR015880	Zinc finger, C2H2, Zinc finger C2H2-type/integrase D-binding domain, Zinc finger, C2H2-like	mmu:320683	R8BEP5	IPR015880	Zinc finger, C2H2-like	XP_007917441.1		100	32.54	81.91	81.91
gene8516	Cluster1	1.47524	2.2747	2.52126	2.4229	2.17353	0.170235	261576			IPR013901	Protein of unknown function DUF1772, fungi	DUF1772	B8NI03	Noranthrone monooxygenase (EC 1.13.12.20)	hypC AFLA_139400	IPR013901	Protein of unknown function DUF1772	afv:AFLA_139400	U1G8U6	IPR013901	Protein of unknown function DUF1772	XP_007806244.1		100	36.72	50.78	50.78
NOV_010700	Cluster1	2.41101	2.34619	2.56945	1.3662	2.17321	0.223684							Q02001, M1WGT4	Anthranilate synthase component 1 (AS) (ASI) (EC 4.1.3.27), Uncharacterized protein	trpE LL1470 L0054, CPUR_08777	IPR005801;IPR019999;IPR006805;IPR005256;IPR015890;, IPR013103;				unknown_gene					36.2, 143				cellular amino acid biosynthetic process [GO:0008652]; tryptophan biosynthetic process [GO:0000162],	, DOMAIN 476 710 Reverse transcriptase Ty1/copia-type. {ECO:0000259|Pfam:PF07727}.
gene7079	Cluster1	0	3.30473	2.47041	2.9043	2.16986	1.65649	62238	GO:0008152, GO:0016491, GO:0003824, GO:0005488, GO:0004344, GO:0018446, GO:0018447, GO:0018448, GO:0018449, GO:0018450, GO:0042469, GO:0045703	metabolic process, oxidoreductase activity, catalytic activity, binding, glucose dehydrogenase activity, pinocarveol dehydrogenase activity, chloral hydrate dehydrogenase activity, hydroxymethylmethylsilanediol oxidase activity, 1-phenylethanol dehydrogenase activity, myrtenol dehydrogenase activity, versicolorin reductase activity, ketoreductase activity	IPR002347, IPR002198, IPR016040	Glucose/ribitol dehydrogenase, Short-chain dehydrogenase/reductase SDR, D(P)-binding	GDHRDH, adh_short, D(P)-binding Rossmann-fold domains
gene2016	Cluster1	1.65054	2.69398	1.77696	2.54378	2.16632	0.209631	249060	GO:0005506, GO:0016491	iron ion binding, oxidoreductase activity	IPR002283, IPR005123	Isopenicillin N synthase, 2OG-Fe(II) oxygenase	IPNSYNTHASE, 2OG-FeII_Oxy	Q84MB6	Probable 2-oxoglutarate-dependent dioxygenase At3g49630 (EC 1.14.11.-)	At3g50210 F11C1.50	IPR002283, IPR005123, IPR026992, IPR027443	Isopenicillin N synthase, Oxoglutarate/iron-dependent dioxygenase, Non-haem dioxygenase N-terminal domain, Isopenicillin N synthase-like	ath:AT3G50210	R8BLN9	IPR002283, IPR005123, IPR026992, IPR027443	Isopenicillin N synthase, Oxoglutarate/iron-dependent dioxygenase, Non-haem dioxygenase N-terminal domain, Isopenicillin N synthase-like	XP_007914931.1		100	29.75	62.86	62.86
gene6471	Cluster1	0.329131	2.57868	3.7391	2.01462	2.16538	1.51049	356178												R8BAK5	IPR013087, IPR015880	Zinc finger C2H2-type/integrase D-binding domain, Zinc finger, C2H2-like	XP_007918910.1		100		39.82	39.82
gene10571	Cluster1	2.13566	2.283	1.74419	2.48992	2.16319	0.0743567	342304	GO:0005215, GO:0006810, GO:0016021	transporter activity, transport, integral to membrane	IPR011701, IPR007114, IPR016196	Major facilitator superfamily MFS-1, Major facilitator superfamily, MFS general substrate transporter	MFS_1, MFS, MFS general substrate transporter	P38776	Probable drug/proton antiporter YHK8	YHK8 YHR048W	IPR005829, IPR011701, IPR020846	Sugar transporter, conserved site, Major facilitator superfamily, Major facilitator superfamily domain	sce:YHR048W	N4V9S3	IPR005829, IPR011701, IPR020846	Sugar transporter, conserved site, Major facilitator superfamily, Major facilitator superfamily domain	ENH79055.1		100	37.96	82.35	82.35
gene972	Cluster1	1.93494	2.21535	2.64511	1.85576	2.16279	0.0953951	67597	GO:0003676	nucleic acid binding	IPR001374	Single-stranded nucleic acid binding R3H	R3H							M7ST65	IPR001374	R3H domain	XP_007793239.1		100		26.71	26.71
NOV_007990	Cluster1	2.77626	2.13865	1.88552	1.83382	2.15856	0.140489							C4R8D7	Autophagy-related protein 37	PAS_chr4_0602	IPR000582;IPR014352;				unknown_gene					31.2				pexophagy [GO:0030242]; protein transport [GO:0015031]	DOMAIN 5 103 ACB. {ECO:0000255|PROSITE-ProRule:PRU00573}.
gene2606	Cluster1	1.05513	3.01885	2.47041	2.08518	2.15739	0.51507	75444			IPR013922, IPR011028	Cyclin-related 2, Cyclin-like	Cyclin, Cyclin-like							G2RAT1	IPR013763, IPR013922	Cyclin-like, Cyclin PHO80-like	XP_003656098.1		100		61.54	61.54
gene11097	Cluster1	2.40915	2.66196	1.46875	2.08518	2.15626	0.19935	26133												G2QVW6	IPR000366, IPR027458	GPCR fungal pheromone mating factor, STE2, Pheromone alpha factor receptor, double transmembrane domain	XP_003651034.1		89.11		43.49	43.49
gene8437	Cluster1	1.88901	1.92652	1.98471	2.80453	2.15119	0.143447	260799	GO:0008152, GO:0016491, GO:0003824, GO:0005488, GO:0016630	metabolic process, oxidoreductase activity, catalytic activity, binding, protochlorophyllide reductase activity	IPR002347, IPR002198, IPR016040	Glucose/ribitol dehydrogenase, Short-chain dehydrogenase/reductase SDR, D(P)-binding	GDHRDH, adh_short, ADH_SHORT, D(P)-binding Rossmann-fold domains	Q9QYF1	Retinol dehydrogenase 11 (EC 1.1.1.300) (Androgen-regulated short-chain dehydrogenase/reductase 1) (Cell line MC/9.IL4-derived protein 1) (M42C60) (Prostate short-chain dehydrogenase/reductase 1) (Retinal reductase 1) (RalR1) (Short-chain aldehyde dehydrogenase) (SCALD)	Rdh11 Arsdr1 Mdt1 Psdr1	IPR002198, IPR002347, IPR016040	Short-chain dehydrogenase/reductase SDR, Glucose/ribitol dehydrogenase, D(P)-binding domain	mmu:17252	W3X4Z5	IPR002198, IPR002347, IPR016040, IPR020904	Short-chain dehydrogenase/reductase SDR, Glucose/ribitol dehydrogenase, D(P)-binding domain, Short-chain dehydrogenase/reductase, conserved site	XP_007832904.1		100	35.66	64.98	64.98
NOV_004830	Cluster1	2.84117	1.12225	2.38256	2.25581	2.15045	0.399814							L6XUJ8	Deleted.						PF08240;PF16912;,					39.7
NOV_012749	Cluster1	2.65823	2.46674	1.90674	1.56054	2.14806	0.191311							A9IYI2, J9K7I4	tR(Ile)-lysidine synthase (EC 6.3.4.19) (tR(Ile)-2-lysyl-cytidine synthase) (tR(Ile)-lysidine synthetase), Uncharacterized protein	tilS BT_2359,	IPR014729;IPR011063;IPR012094;IPR012795;, IPR005135;IPR000477;				PF01339;PF00072;					30.4, 37				tR modification [GO:0006400],	, DOMAIN 587 977 Reverse transcriptase. {ECO:0000259|PROSITE:PS50878}.
gene6028	Cluster1	2.5636	1.50549	2.7447	1.77832	2.14803	0.269564	106275	GO:0008270, GO:0016491, GO:0003824, GO:0005488, GO:0008152, GO:0004022, GO:0004023, GO:0004024, GO:0004025	zinc ion binding, oxidoreductase activity, catalytic activity, binding, metabolic process, alcohol dehydrogenase activity, alcohol dehydrogenase activity, metal ion-independent, alcohol dehydrogenase activity, zinc-dependent, alcohol dehydrogenase activity, iron-dependent	IPR013149, IPR013154, IPR002328, IPR011032, IPR016040	Alcohol dehydrogenase, zinc-binding, Alcohol dehydrogenase GroES-like, Alcohol dehydrogenase, zinc-containing, conserved site, GroES-like, D(P)-binding	ADH_zinc_N, ADH_N, ADH_ZINC, GroES-like, D(P)-binding Rossmann-fold domains	Q9P6C8	Alcohol dehydrogenase 1 (EC 1.1.1.1) (Alcohol dehydrogenase I)	adh-1 B17C10.210 NCU01754	IPR002085, IPR002328, IPR011032, IPR013149, IPR013154, IPR016040	Alcohol dehydrogenase superfamily, zinc-type, Alcohol dehydrogenase, zinc-type, conserved site, GroES-like, Alcohol dehydrogenase, C-terminal, Alcohol dehydrogenase, N-terminal, D(P)-binding domain	ncr:NCU01754	R8BWA9	IPR002085, IPR002328, IPR011032, IPR013149, IPR013154, IPR016040	Alcohol dehydrogenase superfamily, zinc-type, Alcohol dehydrogenase, zinc-type, conserved site, GroES-like, Alcohol dehydrogenase, C-terminal, Alcohol dehydrogenase, N-terminal, D(P)-binding domain	XP_007911619.1	XM_006968163.1	100	78.31	85.59	85.59	79.3
gene10137	Cluster1	2.06384	2.35581	1.99782	2.1322	2.13742	0.0181561	353134						Q9V496	Apolipophorins (Retinoid- and fatty acid-binding glycoprotein) [Cleaved into: Apolipophorin-2 (ApoL2) (Apolipophorin II); Apolipophorin-1 (ApoL1) (Apolipophorin I)]	Rfabg RfaBp CG11064	IPR001747, IPR001846, IPR009454, IPR011030, IPR015255, IPR015816, IPR015817, IPR015818, IPR015819	Lipid transport protein, N-terminal, von Willebrand factor, type D domain, Lipid transport, open beta-sheet, Vitellinogen, superhelical, Vitellinogen, open beta-sheet, Vitellinogen, beta-sheet N-terminal, Vitellinogen, open beta-sheet, subdomain 1, Vitellinogen, open beta-sheet, subdomain 2, Lipid transport protein, beta-sheet shell	dme:Dmel_CG11064	N1PMP8			EME42775.1		100	42.5	79.41	79.41
gene9168	Cluster1	1.51517	2.3326	0.491115	4.20432	2.1358	1.85192	264836	GO:0006118, GO:0006725, GO:0008198, GO:0016491	electron transport, aromatic compound metabolic process, ferrous iron binding, oxidoreductase activity	IPR004183, IPR014436	Extradiol ring-cleavage dioxygenase, class III enzyme, subunit B, Extradiol aromatic ring-opening dioxygenase, DODA type	LigB, Extradiol aromatic ring-opening dioxygenase, DODA type, LigB subunit of an aromatic-ring-opening dioxygenase LigAB	Q70FG7	4,5-DOPA dioxygenase extradiol (EC 1.13.11.29)	DODA	IPR004183, IPR014436	Extradiol ring-cleavage dioxygenase, class III enzyme, subunit B, Extradiol aromatic ring-opening dioxygenase, DODA type		A0A064AZB7	IPR004183	Extradiol ring-cleavage dioxygenase, class III enzyme, subunit B	EIT82097.1		100	34.43	59.72	59.72
gene6304	Cluster1	2.37213	2.20071	1.98889	1.97726	2.13475	0.0266945	289961	GO:0004177, GO:0006508, GO:0005737, GO:0016804	aminopeptidase activity, proteolysis, cytoplasm, prolyl aminopeptidase activity	IPR002410, IPR000073, IPR005945	Peptidase S33, prolyl aminopeptidase, Alpha/beta hydrolase fold-1, Peptidase S33, tricorn interacting factor 1	PROAMNOPTASE, Abhydrolase_1, Proline-specific peptidase, F1 type, pro_imino_pep_2: proline-specific pep	C3K630	L-amino acid amidase (EC 3.5.1.101)	laaA PFLU_1629	IPR000073, IPR002410, IPR005945, IPR029058	Alpha/beta hydrolase fold-1, Peptidase S33, Proline-specific peptidase, Alpha/Beta hydrolase fold	pfs:PFLU_1629	M7SYR9	IPR000073, IPR002410, IPR005945, IPR029058	Alpha/beta hydrolase fold-1, Peptidase S33, Proline-specific peptidase, Alpha/Beta hydrolase fold	XP_007791453.1		100	42.24	71.82	71.82
NOV_007171	Cluster1	2.01661	1.42515	2.92062	2.15482	2.1293	0.28384							Q17VS7, W9NU47	Urease subunit alpha (EC 3.5.1.5) (Urea amidohydrolase subunit alpha), Uncharacterized protein	ureA Hac_1532, FOVG_14679	IPR002019;IPR008223;IPR002026;, IPR002110;IPR020683;				PF00485;,					33.9, 55.5				urea catabolic process [GO:0043419],	, DOMAIN 65 259 ANK_REP_REGION. {ECO:0000259|PROSITE:PS50297}.
NOV_006438	Cluster1	2.82209	1.51342	2.19031	1.98802	2.12846	0.220734							C5CBV0	Pup--protein ligase (EC 6.3.1.19) (Proteasome accessory factor A) (Pup-conjugating enzyme)	pafA Mlut_11920	IPR022279;IPR004347;				PF01225;PF02875;PF08245;,					28.1				modification-dependent protein catabolic process [GO:0019941]; proteasomal protein catabolic process [GO:0010498]; protein pupylation [GO:0070490]
gene5597	Cluster1	1.6152	2.3158	1.14816	3.42771	2.12671	0.73689	355993												A0A072NYS8	IPR010753, IPR011008	Domain of unknown function DUF1330, Dimeric alpha-beta barrel	KEF52726.1		100		38.24	38.24
NOV_011786	Cluster1	2.92266	2.69254	1.53838	1.34719	2.12519	0.47687							P45968, G4N5W0	Chromo domain-containing protein cec-3, Uncharacterized protein	cec-3 T09A5.8, MGG_17035	IPR000953;IPR023780;IPR016197;IPR023779;,									52.8, 109				negative regulation of gene expression [GO:0010629],	DOMAIN 24 84 Chromo. {ECO:0000255|PROSITE-ProRule:PRU00053}.,
gene8198	Cluster1	1.46971	2.23779	2.42867	2.34648	2.12066	0.145831	262729						A8GE00	Electron transport complex subunit C	Spro_2239	IPR009051, IPR010208, IPR011538, IPR017896, IPR017900, IPR019554, IPR026902	Alpha-helical ferredoxin, Electron transport complex, subunit RnfC/RsxC, DH-ubiquinone oxidoreductase 51 kDa subunit, FMN-binding domain, 4Fe-4S ferredoxin-type, iron-sulphur binding domain, 4Fe-4S ferredoxin, iron-sulphur binding, conserved site, Soluble ligand binding domain, RnfC Barrel sandwich hybrid domain	spe:Spro_2239	G9MH51			EHK26041.1		100	35.48	34.9	34.9
NOV_004503	Cluster1	2.59214	1.95635	1.78914	2.14376	2.12035	0.0899337							P0ABD1, G4NFE4	Uncharacterized transporter YeaV, Uncharacterized protein	yeaV b1801 JW5293, MGG_17655	IPR018093;IPR000060;,				unknown_gene					32.7, 94.4				nitrogen compound transport [GO:0071705],	,
gene6771	Cluster1	3.00649	2.54449	2.08559	0.838795	2.11884	0.652178	339766	GO:0005351, GO:0009401	sugar:hydrogen symporter activity, phosphoenolpyruvate-dependent sugar phosphotransferase system	IPR002114, IPR016196	Phosphotransferase system, HPr serine phosphorylation site, MFS general substrate transporter	PTS_HPR_SER, MFS general substrate transporter	P10978	Retrovirus-related Pol polyprotein from transposon TNT 1-94 [Includes: Protease (EC 3.4.23.-); Reverse transcriptase (EC 2.7.7.49); Endonuclease]		IPR001584, IPR001878, IPR012337, IPR013103, IPR025724	Integrase, catalytic core, Zinc finger, CCHC-type, Ribonuclease H-like domain, Reverse transcriptase, R-dependent D polymerase, GAG-pre-integrase domain		B7EQQ7	IPR001584, IPR012337, IPR013103, IPR025724	Integrase, catalytic core, Ribonuclease H-like domain, Reverse transcriptase, R-dependent D polymerase, GAG-pre-integrase domain	BAG94704.1	XM_001904509.1	98.77	29.13	29.28	29.28	83.14
gene5669	Cluster1	1.5297	1.77941	1.15546	4.01042	2.11875	1.24212	255304			IPR000073	Alpha/beta hydrolase fold-1	Abhydrolase_1	Q9VYA7	RRP12-like protein	CG2691	IPR012978, IPR016024	Uncharacterised domain NUC173, Armadillo-type fold	dme:Dmel_CG2691	M7T6U8	IPR000073, IPR029058	Alpha/beta hydrolase fold-1, Alpha/Beta hydrolase fold	XP_007795368.1		100	41.67	63.53	63.53
gene892	Cluster1	1.9785	2.32665	2.31434	1.83839	2.11447	0.0449195	349555		unknown_gene		unknown_gene			unknown_gene			unknown_gene		A0A010QQT6		unknown_gene	XP_007593848.1	XM_015068516.1	100		29.89	29.89	100
gene8468	Cluster1	2.08193	2.18669	2.81885	1.36201	2.11237	0.267152	65241	GO:0003824, GO:0050660	catalytic activity, FAD binding	IPR016166	FAD-binding, type 2	FAD-binding domain	Q54H55	FAD-linked oxidoreductase DDB_G0289697 (EC 1.-.-.-)	DDB_G0289697	IPR006094, IPR012951, IPR016166, IPR016167, IPR016169	FAD linked oxidase, N-terminal, Berberine/berberine-like, FAD-binding, type 2, FAD-binding, type 2, subdomain 1, CO dehydrogenase flavoprotein-like, FAD-binding, subdomain 2	ddi:DDB_G0289697	Q0UE86	IPR006094, IPR016166, IPR016167, IPR016169	FAD linked oxidase, N-terminal, FAD-binding, type 2, FAD-binding, type 2, subdomain 1, CO dehydrogenase flavoprotein-like, FAD-binding, subdomain 2	XP_001800214.1		100	31.58	57.69	57.69
gene7351	Cluster1	2.97027	-0.00887915	3.15513	2.31747	2.1085	1.59126	258231			IPR011701, IPR016196	Major facilitator superfamily MFS-1, MFS general substrate transporter	MFS_1, MFS general substrate transporter	Q08268	Probable transporter MCH4	MCH4 YOL119C	IPR011701, IPR020846	Major facilitator superfamily, Major facilitator superfamily domain	sce:YOL119C	H1W3E4	IPR011701, IPR020846	Major facilitator superfamily, Major facilitator superfamily domain	CCF47007.1		100	26.21	75	75
gene1303	Cluster1	2.45941	2.68886	2.13901	1.14317	2.10761	0.348185	66385		unknown_gene		unknown_gene			unknown_gene			unknown_gene		S0EBF7		unknown_gene	CCT72276.1		99		40	40
gene4694	Cluster1	2.16177	1.79087	1.98907	2.48806	2.10744	0.0655142	287666	GO:0005215, GO:0006810, GO:0016021	transporter activity, transport, integral to membrane	IPR011701, IPR007114, IPR016196	Major facilitator superfamily MFS-1, Major facilitator superfamily, MFS general substrate transporter	MFS_1, MFS, MFS general substrate transporter	O59833	Uncharacterized transporter C965.13	SPCC965.13	IPR005829, IPR011701, IPR020846	Sugar transporter, conserved site, Major facilitator superfamily, Major facilitator superfamily domain	spo:SPCC965.13	R8BGL3	IPR011701, IPR020846	Major facilitator superfamily, Major facilitator superfamily domain	XP_007916821.1	XM_014317185.1	100	59.56	79.71	79.71	78.85
gene8829	Cluster1	1.32643	2.56779	1.81794	2.68427	2.09911	0.30954	293216	GO:0005215, GO:0006810, GO:0016021	transporter activity, transport, integral to membrane	IPR011701, IPR007114, IPR016196	Major facilitator superfamily MFS-1, Major facilitator superfamily, MFS general substrate transporter	MFS_1, MFS, MFS general substrate transporter	O74829	Uncharacterized MFS-type transporter C530.15c	SPBC530.15c SPBC661.01	IPR011701, IPR020846	Major facilitator superfamily, Major facilitator superfamily domain	spo:SPBC530.15c	K2SIJ0	IPR011701, IPR020846	Major facilitator superfamily, Major facilitator superfamily domain	EKG16620.1	XM_007307364.1	100	45.65	76.47	76.47	81.87
gene2617	Cluster1	1.88187	2.38763	2.07199	2.04945	2.09774	0.0334076	343689		unknown_gene		unknown_gene			unknown_gene			unknown_gene				unknown_gene
gene4171	Cluster1	1.58436	2.29415	2.19059	2.31957	2.09717	0.0899903	69389	GO:0003824, GO:0005488, GO:0008152	catalytic activity, binding, metabolic process	IPR016040	D(P)-binding	D(P)-binding Rossmann-fold domains	P87025	Trihydroxynaphthalene reductase (EC 1.1.1.-) (T3HN reductase)	THR1 Cob_04570	IPR002198, IPR002347, IPR016040	Short-chain dehydrogenase/reductase SDR, Glucose/ribitol dehydrogenase, D(P)-binding domain		M2N800	IPR002198, IPR002347, IPR016040, IPR020904	Short-chain dehydrogenase/reductase SDR, Glucose/ribitol dehydrogenase, D(P)-binding domain, Short-chain dehydrogenase/reductase, conserved site	XP_007672744.1		100	37.21	58.33	58.33
gene670	Cluster1	2.06873	1.861	2.15633	2.28822	2.09357	0.0241338	354528			IPR001938	Thaumatin, pathogenesis-related	Osmotin, thaumatin-like protein	A0KLY1	Tetraacyldisaccharide 4'-kinase (EC 2.7.1.130) (Lipid A 4'-kinase)	lpxK AHA_2777	IPR003758, IPR027417	Tetraacyldisaccharide 4'-kinase, P-loop containing nucleoside triphosphate hydrolase	aha:AHA_2777	R8BH28			XP_007916550.1		100	40	55.14	55.14
gene9785	Cluster1	1.90704	2.73186	2.1748	1.55976	2.09336	0.183442	72595	GO:0005515, GO:0004308	protein binding, exo-alpha-sialidase activity	IPR000210, IPR011333	BTB/POZ-like, BTB/POZ fold	BTB, POZ domain							R8BYD9	IPR000467, IPR011333	G-patch domain, SKP1/BTB/POZ domain	XP_007910911.1	XM_013039691.1	97.73		52.38	52.38	97.06
gene8133	Cluster1	2.67932	1.68927	1.59877	2.39388	2.09031	0.210383	73915						Q03PW4	50S ribosomal protein L16	rplP LVIS_1683	IPR000114, IPR016180, IPR020798	Ribosomal protein L16, Ribosomal protein L10e/L16, Ribosomal protein L16, conserved site	lbr:LVIS_1683	T5A6A5			EQL01005.1		87.38	39.53	33.09	33.09
NOV_010593	Cluster1	2.09316	2.14411	1.74053	2.37336	2.08779	0.051335								unknown_gene	unknown_gene	unknown_gene				unknown_gene									unknown_gene
NOV_013027	Cluster1	2.49079	2.45719	1.68253	1.70787	2.0846	0.15185							Q5E9N3, C8ZY12	E3 ubiquitin-protein ligase RNF25 (EC 6.3.2.-) (RING finger protein 25), Predicted protein	RNF25, EGBG_00579	IPR006575;IPR016135;IPR001841;IPR013083;,				PF03749;					34.3, 38.9				positive regulation of NF-kappaB transcription factor activity [GO:0051092]; protein ubiquitination [GO:0016567],	DOMAIN 18 128 RWD. {ECO:0000255|PROSITE-ProRule:PRU00179}.,
gene7998	Cluster1	1.03699	1.9766	2.37514	2.94388	2.08315	0.482979	261577	GO:0048037, GO:0008152, GO:0003824, GO:0005488	cofactor binding, metabolic process, catalytic activity, binding	IPR014030, IPR006163, IPR014043, IPR014031, IPR009081, IPR016035, IPR016039, IPR016036	Beta-ketoacyl synthase, N-terminal, Phosphopantetheine-binding, Acyl transferase, Beta-ketoacyl synthase, C-terminal, Acyl carrier protein-like, Acyl transferase/acyl hydrolase/lysophospholipase, Thiolase-like, Malonyl-CoA ACP transacylase, ACP-binding	ketoacyl-synt, PP-binding, Acyl_transf_1, Ketoacyl-synt_C, ACP_DOMAIN, B_KETOACYL_SYNTHASE, ACP-like, FabD/lysophospholipase-like, Thiolase-like, Probable ACP-binding domain of malonyl-CoA ACP transacylase	Q12053	Noranthrone synthase (EC 2.3.1.221) (Aflatoxin biosynthesis polyketide synthase) (PKS) (Aflatoxin biosynthesis protein C) (Polyketide synthase A)	pksL1 aflC pksA	IPR001031, IPR001227, IPR009081, IPR014030, IPR014031, IPR014043, IPR016035, IPR016036, IPR016039, IPR020801, IPR020807, IPR029058, IPR030918, IPR032088	Thioesterase, Acyl transferase domain, Acyl carrier protein-like, Beta-ketoacyl synthase, N-terminal, Beta-ketoacyl synthase, C-terminal, Acyl transferase, Acyl transferase/acyl hydrolase/lysophospholipase, Malonyl-CoA ACP transacylase, ACP-binding, Thiolase-like, Polyketide synthase, acyl transferase domain, Polyketide synthase, dehydratase domain, Alpha/Beta hydrolase fold, Polyketide product t…		U1GE70	IPR001227, IPR014030, IPR014031, IPR014043, IPR016035, IPR016036, IPR016039, IPR018201, IPR020801, IPR030918, IPR032088	Acyl transferase domain, Beta-ketoacyl synthase, N-terminal, Beta-ketoacyl synthase, C-terminal, Acyl transferase, Acyl transferase/acyl hydrolase/lysophospholipase, Malonyl-CoA ACP transacylase, ACP-binding, Thiolase-like, Beta-ketoacyl synthase, active site, Polyketide synthase, acyl transferase domain, Polyketide product template domain, Starter unit:ACP transacylase	XP_007786761.1	XM_008733219.1	100	45.04	71.5	71.5	88.89
gene11314	Cluster1	1.3335	2.45744	2.91271	1.61962	2.08082	0.401271	232943	GO:0000166, GO:0017111, GO:0005524	nucleotide binding, nucleoside-triphosphatase activity, ATP binding	IPR003959, IPR003593, IPR003960	AAA ATPase, core, AAA+ ATPase, core, AAA ATPase, conserved site	AAA, no description	Q54DY9	Probable mitochondrial chaperone BCS1-B (BCS1-like protein 2)	bcsl1b DDB_G0291910	IPR003593, IPR003959, IPR014851, IPR027243, IPR027417	AAA+ ATPase domain, ATPase, AAA-type, core, BCS1, N-terminal, Mitochondrial chaperone BCS1/plant AAA ATPases, P-loop containing nucleoside triphosphate hydrolase	ddi:DDB_G0291910	G4MN83	IPR003593, IPR003959, IPR014851, IPR027417	AAA+ ATPase domain, ATPase, AAA-type, core, BCS1, N-terminal, P-loop containing nucleoside triphosphate hydrolase	XP_003708818.1		83.7	37.29	45.65	45.65
gene4856	Cluster1	2.11624	2.2769	2.26822	1.66173	2.08077	0.0626143	328166	GO:0005515	protein binding	IPR011333	BTB/POZ fold	POZ domain							E5A352	IPR000210, IPR011333	BTB/POZ domain, SKP1/BTB/POZ domain	XP_003841544.1		100		31.33	31.33
gene1998	Cluster1	2.21734	2.37613	1.5149	2.20419	2.07814	0.110325	67625						A7HSL2	Ribosomal R small subunit methyltransferase G (EC 2.1.1.170) (16S rR 7-methylguanosine methyltransferase) (16S rR m7G methyltransferase)	rsmG Plav_1275	IPR003682, IPR029063	rR small subunit methyltransferase G, S-adenosyl-L-methionine-dependent methyltransferase	pla:Plav_1275				KFL52906.1		100	29.89	35.34
gene7269	Cluster1	1.42062	2.69826	1.1513	3.04216	2.07809	0.651311	258999	GO:0006808, GO:0016564, GO:0003824, GO:0005488, GO:0008152, GO:0016631, GO:0018498, GO:0018499, GO:0018500, GO:0018501, GO:0018502, GO:0018503, GO:0043786	regulation of nitrogen utilization, transcription repressor activity, catalytic activity, binding, metabolic process, enoyl-[acyl-carrier-protein] reductase activity, 2,3-dihydroxy-2,3-dihydro-phenylpropionate dehydrogenase activity, cis-2,3-dihydrodiol DDT dehydrogenase activity, trans-9R,10R-dihydrodiolphenanthrene dehydrogenase activity, cis-chlorobenzene dihydrodiol dehydrogenase activity, 2,…	IPR008030, IPR016040	NmrA-like, D(P)-binding	NmrA, D(P)-binding Rossmann-fold domains	Q9SVP6	Pinoresinol reductase 2 (AtPrR2) ((-)-pinoresinol reductase) (EC 1.23.1.3) (Pinoresinol-lariciresinol reductase 2) (AtPLR2)	PRR2 PLR2 At4g13660 F18A5.50	IPR008030, IPR016040	NmrA-like domain, D(P)-binding domain	ath:AT4G13660	F0XR45	IPR000801, IPR008030, IPR011701, IPR016040, IPR020846, IPR029058	Putative esterase, NmrA-like domain, Major facilitator superfamily, D(P)-binding domain, Major facilitator superfamily domain, Alpha/Beta hydrolase fold	EFW99959.1		100	30	46.67	46.67
gene907	Cluster1	2.62063	0.84121	1.32999	3.51434	2.07654	1.11167	248474			IPR003480	Transferase	Transferase	Q12226	Trichothecene 3-O-acetyltransferase (EC 2.3.1.-)	AYT1 YLL063C L0549	IPR003480, IPR023213	Transferase, Chloramphenicol acetyltransferase-like domain	sce:YLL063C	A0A094I173	IPR003480, IPR023213	Transferase, Chloramphenicol acetyltransferase-like domain	KFZ19464.1		100	31.84	69.93	69.93
NOV_009448	Cluster1	1.87053	2.43444	2.20265	1.79617	2.07595	0.0662608								unknown_gene	unknown_gene	unknown_gene				PF00431;PF12947;PF07645;PF00053;PF01437;									unknown_gene
gene6172	Cluster1	2.03103	2.16014	2.3649	1.7421	2.07454	0.0510102	355925			IPR006629	LPS-induced tumor necrosis factor alpha factor	no description							E9EUW9	IPR006629	LPS-induced tumour necrosis factor alpha factor	XP_007820007.1		100		57.14	57.14
gene6292	Cluster1	1.99651	1.40539	2.4029	2.49142	2.07406	0.183864	289940			IPR008972	Cupredoxin	Cupredoxins	F1SVE1	F(420)H(2) dehydrogenase subunit O (EC 1.12.98.3) (F(420)H(2)-dependent phenazine dehydrogenase subunit O) (F(420)H(2)-dependent phenazine oxidoreductase subunit O) (FPO subunit O) (Methanophenazine hydrogenase subunit O) (Methanosarcina-phenazine hydrogenase subunit O)	fpoO MM_2479	IPR018288	F420-dehydrogenase, subunit FpoO	mma:MM_2479	F0X9S8	IPR008972	Cupredoxin	EFX05912.1	XM_014319919.1	100	37.1	75	75	76.92
gene7440	Cluster1	2.90061	1.66494	1.16301	2.55211	2.07017	0.477264	330499						Q4JV02	Ribosome maturation factor RimM	rimM jk1191	IPR002676, IPR009000, IPR011033, IPR011961, IPR027275	RimM protein, Translation protein, beta-barrel domain, PRC-barrel-like, 16S rR processing protein RimM, PRC-barrel domain	cjk:jk1191	A0A093ZNF6			KFY18841.1		100	36.23	53.85	53.85
gene9528	Cluster1	3.26653	1.36535	2.01007	1.63653	2.06962	0.529923	323427			IPR017853	Glycoside hydrolase, catalytic core	(Trans)glycosidases	Q09788	Alkali-sensitive linkage protein 1	asl1 SPAC13G6.10c	IPR013781, IPR017853, IPR024655	Glycoside hydrolase, catalytic domain, Glycoside hydrolase superfamily, Uncharacterised protein family, glycosyl hydrolase catalytic domain	spo:SPAC13G6.10c	R8BNX8	IPR013781, IPR017853, IPR024655	Glycoside hydrolase, catalytic domain, Glycoside hydrolase superfamily, Uncharacterised protein family, glycosyl hydrolase catalytic domain	XP_007914081.1		99.58	33.04	82.13	82.13
gene3667	Cluster1	1.92861	2.12244	1.79459	2.42594	2.06789	0.0563164	241252		unknown_gene		unknown_gene			unknown_gene			unknown_gene		R8BDP7		unknown_gene	XP_007917740.1		100		60.23	60.23
gene325	Cluster1	1.94969	3.24946	2.29957	0.765599	2.06608	0.789926	354222						A4H7A3	Adenylosuccinate synthetase (AMPSase) (AdSS) (EC 6.3.4.4) (IMP--aspartate ligase)	LbrM13_V2.0970 LbrM_13_0970	IPR001114, IPR018220, IPR027417	Adenylosuccinate synthetase, Adenylosuccinate synthase, active site, P-loop containing nucleoside triphosphate hydrolase	lbz:LBRM_13_0970	G2RD18			XP_003657047.1		100	47.37	47.27	47.27
gene3263	Cluster1	2.37523	2.51444	1.80271	1.57115	2.06589	0.15273	326833		unknown_gene		unknown_gene			unknown_gene			unknown_gene				unknown_gene			100
gene1927	Cluster1	2.12361	1.91082	1.5303	2.69666	2.06535	0.178028	241855	GO:0009058, GO:0016788	biosynthetic process, hydrolase activity, acting on ester bonds	IPR001031	Thioesterase	Thioesterase							J3NXK6	IPR001031, IPR029058	Thioesterase, Alpha/Beta hydrolase fold	XP_009222088.1		100		49.45	49.45
gene8584	Cluster1	1.1699	2.78678	2.61711	1.67936	2.06329	0.443925	263077	GO:0008152, GO:0016787, GO:0004620, GO:0016298, GO:0018731, GO:0018732, GO:0018733, GO:0018734	metabolic process, hydrolase activity, phospholipase activity, lipase activity, 1-oxa-2-oxocycloheptane lactonase activity, sulfolactone hydrolase activity, 3,4-dihydrocoumarin hydrolase activity, butyrolactone hydrolase activity	IPR013094	Alpha/beta hydrolase fold-3	Abhydrolase_3	Q5UQ83	Putative alpha/beta hydrolase R526 (EC 3.-.-.-)	MIMI_R526	IPR013094, IPR029058	Alpha/beta hydrolase fold-3, Alpha/Beta hydrolase fold	vg:9925159	T0K9F6	IPR013094, IPR029058	Alpha/beta hydrolase fold-3, Alpha/Beta hydrolase fold	EQB49673.1		100	30.08	53.54	53.54
NOV_010633	Cluster1	1.72912	2.79833	1.87154	1.84581	2.0612	0.184								unknown_gene	unknown_gene	unknown_gene													unknown_gene
gene3673	Cluster1	1.06283	2.15926	1.46333	3.55302	2.05961	0.897329	327426		unknown_gene		unknown_gene			unknown_gene			unknown_gene		B2ACI1		unknown_gene	XP_001903371.1		100		63.33	63.33
gene7244	Cluster1	2.11068	2.4659	1.47619	2.16428	2.05426	0.129725	292237	GO:0004497, GO:0005506, GO:0006118, GO:0020037, GO:0018585, GO:0018586, GO:0018587, GO:0018588, GO:0018589, GO:0018590, GO:0018591, GO:0018592, GO:0018593, GO:0018594, GO:0018595, GO:0018596, GO:0018597, GO:0018598, GO:0018599, GO:0018600, GO:0043823	monooxygenase activity, iron ion binding, electron transport, heme binding, fluorene oxygenase activity, mono-butyltin dioxygenase activity, limonene 8-monooxygenase activity, tri-n-butyltin dioxygenase activity, di-n-butyltin dioxygenase activity, methylsilanetriol hydroxylase activity, methyl tertiary butyl ether 3-monooxygenase activity, 4-nitrocatechol 4-monooxygenase activity, 4-chlorophenox…	IPR001128, IPR002401	Cytochrome P450, Cytochrome P450, E-class, group I	P450, EP450I, p450, Cytochrome P450	Q93VK5	Protein LUTEIN DEFICIENT 5, chloroplastic (EC 1.14.-.-) (Cytochrome P450 97A3)	CYP97A3 LUT5 At1g31800 F5M6.19	IPR001128, IPR002401, IPR017972	Cytochrome P450, Cytochrome P450, E-class, group I, Cytochrome P450, conserved site	ath:AT1G31800	R8BBX6	IPR001128, IPR002401	Cytochrome P450, Cytochrome P450, E-class, group I	XP_007918374.1		100	26.19	65.12	65.12
NOV_011754	Cluster1	3.13433	2.89093	2.63584	-0.451482	2.05241	2.12089							Q7CWE8, R6CAC7	Homoserine O-succinyltransferase (EC 2.3.1.46) (Homoserine O-transsuccinylase) (HTS), Methylenetetrahydrofolate--tR-(uracil-5-)-methyltransferase TrmFO (EC 2.1.1.74) (Folate-dependent tR (uracil-5-)-methyltransferase) (Folate-dependent tR(M-5-U54)-methyltransferase)	metA Atu2718 AGR_C_4927, trmFO BN718_01243	IPR029062;IPR005697;, IPR023753;IPR002218;IPR004417;				PF03162;					32.7, 38.9				L-methionine biosynthetic process from homoserine via O-succinyl-L-homoserine and cystathionine [GO:0019281],	,
NOV_002305	Cluster1	1.94086	2.35295	2.59351	1.31346	2.0502	0.235396							B6IRP7, S0DRK6	D-directed R polymerase subunit beta' (RP subunit beta') (EC 2.7.7.6) (R polymerase subunit beta') (Transcriptase subunit beta'), Related to heterokaryon incompatibility protein	rpoC RC1_0702, FFUJ_00185	IPR012754;IPR000722;IPR006592;IPR007080;IPR007066;IPR007083;IPR007081;, IPR002110;IPR020683;				PF00560;PF13855;PF08263;PF00069;,					32.7, 241				transcription, D-templated [GO:0006351],	, DOMAIN 795 2532 ANK_REP_REGION. {ECO:0000259|PROSITE:PS50297}.
gene7688	Cluster1	2.14332	2.46878	1.93146	1.6536	2.04929	0.0888185	222371						C7GLH7	Sphingoid long-chain base transporter RSB1	RSB1 C1Q_01055	IPR007568	RTA-like protein		R1GIZ7	IPR007568	RTA-like protein	XP_007580882.1		100	38.6	67.24	67.24
gene6082	Cluster1	1.77583	2.48062	1.83425	2.10407	2.04869	0.0775159	329199						Q9VDY1	Putative D helicase Ino80 (dINO80) (EC 3.6.4.12)	Ino80 CG31212	IPR000330, IPR001650, IPR014001, IPR020838, IPR027417, IPR031047	SNF2-related, N-terminal domain, Helicase, C-terminal, Helicase superfamily 1/2, ATP-binding domain, DBINO domain, P-loop containing nucleoside triphosphate hydrolase, D helicase Ino80	dme:Dmel_CG31212	A0A084BZT3	IPR000250, IPR013320	Peptidase G1, Concanavalin A-like lectin/glucanase domain	XP_746812.1		100	37.1	30.27	30.27
gene6878	Cluster1	2.05502	1.78425	2.01973	2.33043	2.04736	0.0375441	330624	GO:0008152, GO:0016491, GO:0003824, GO:0005488, GO:0043738, GO:0043826, GO:0043883, GO:0051341	metabolic process, oxidoreductase activity, catalytic activity, binding, F420H2 dehydrogenase activity, sulfur oxygenase reductase activity, malolactic enzyme activity, regulation of oxidoreductase activity	IPR002198, IPR016040	Short-chain dehydrogenase/reductase SDR, D(P)-binding	adh_short, D(P)-binding Rossmann-fold domains	A0KMY1	Dipeptide and tripeptide permease B	dtpB AHA_3132	IPR000109, IPR005279, IPR018456, IPR020846, IPR023778	Proton-dependent oligopeptide transporter family, Dipeptide/tripeptide permease, PTR2 family proton/oligopeptide symporter, conserved site, Major facilitator superfamily domain, Amino acid/peptide transporter family, dipeptide/tripeptide permease B	aha:AHA_3132	E3QYA2	IPR002198, IPR002347, IPR016040	Short-chain dehydrogenase/reductase SDR, Glucose/ribitol dehydrogenase, D(P)-binding domain	EFQ35840.1		87.5	44.44	49.15	49.15
gene1115	Cluster1	1.39927	2.18279	2.34143	2.25937	2.04571	0.142442	66038		unknown_gene		unknown_gene			unknown_gene			unknown_gene				unknown_gene			100
gene2488	Cluster1	2.20194	1.39983	2.34508	2.22662	2.04337	0.140976	75449		unknown_gene		unknown_gene			unknown_gene			unknown_gene		X0FPU0		unknown_gene	EXL39874.1		100		29.73	29.73
gene6896	Cluster1	1.8807	2.92649	1.24444	2.10346	2.03877	0.362046	42859	GO:0004553, GO:0005975, GO:0008422	hydrolase activity, hydrolyzing O-glycosyl compounds, carbohydrate metabolic process, beta-glucosidase activity	IPR001764, IPR002772, IPR017853	Glycoside hydrolase, family 3, N-terminal, Glycoside hydrolase, family 3, C-terminal, Glycoside hydrolase, catalytic core	GLHYDRLASE3, Glyco_hydro_3, Glyco_hydro_3_C, GLYCOSYL_HYDROL_F3, (Trans)glycosidases, Beta-D-glucan exohydrolase, C-terminal domain
gene226	Cluster1	1.91197	2.20615	2.09078	1.93098	2.03497	0.0145897	222606	GO:0004671, GO:0006481, GO:0016021	protein-S-isoprenylcysteine O-methyltransferase activity, C-terminal protein amino acid methylation, integral to membrane	IPR007269	Isoprenylcysteine carboxyl methyltransferase	ICMT	P32584	Protein-S-isoprenylcysteine O-methyltransferase (EC 2.1.1.100) (Isoprenylcysteine carboxylmethyltransferase) (Prenylated protein carboxyl methyltransferase) (PPMT) (Prenylcysteine carboxyl methyltransferase) (pcCMT)	STE14 YDR410C D9461.1	IPR007269, IPR025770	Isoprenylcysteine carboxyl methyltransferase, Protein-S-isoprenylcysteine O-methyltransferase	sce:YDR410C	A0A090DCC5	IPR007269, IPR025770	Isoprenylcysteine carboxyl methyltransferase, Protein-S-isoprenylcysteine O-methyltransferase	CDP32488.1	XM_009658821.1	100	39.58	70.71	70.71	75.76
NOV_004607	Cluster1	2.46425	2.17749	1.38618	2.10786	2.03395	0.157707							M1W833	Related to retrotransposon HobS hobase	CPUR_02633	IPR001584;IPR012337;IPR013103;				unknown_gene					141				D integration [GO:0015074]	DOMAIN 607 777 Integrase catalytic. {ECO:0000259|PROSITE:PS50994}.
NOV_002422	Cluster1	1.4468	3.06634	1.4659	2.15416	2.0333	0.436924							Q9D6I7	Protein FAM69A	Fam69a	IPR022049;IPR029244;				PF00168;PF08165;PF08150;PF08151;PF16165;, PF00733;PF13537;					34.3
gene8758	Cluster1	1.17577	2.90387	1.89769	2.13808	2.02885	0.380634	99684	GO:0005351, GO:0008643, GO:0016020, GO:0005215, GO:0006810, GO:0016021	sugar:hydrogen symporter activity, carbohydrate transport, membrane, transporter activity, transport, integral to membrane	IPR003663, IPR005828, IPR007114, IPR005829, IPR016196	Sugar transporter, General substrate transporter, Major facilitator superfamily, Sugar transporter, conserved site, MFS general substrate transporter	SUGRTRNSPORT, Sugar_tr, SP: MFS transporter, sugar porter (SP) famil, MFS, SUGAR_TRANSPORT_1, SUGAR_TRANSPORT_2, MFS general substrate transporter	O74849	High-affinity fructose transporter ght6 (Hexose transporter 6) (Meiotic expression up-regulated protein 12)	ght6 meu12 SPCC1235.13	IPR003663, IPR005828, IPR005829, IPR020846	Sugar/inositol transporter, Major facilitator, sugar transporter-like, Sugar transporter, conserved site, Major facilitator superfamily domain	spo:SPCC1235.13	W9WPB4	IPR003663, IPR005828, IPR005829, IPR020846	Sugar/inositol transporter, Major facilitator, sugar transporter-like, Sugar transporter, conserved site, Major facilitator superfamily domain	XP_007745595.1	XM_014082914.1	100	40.04	66.67	66.67	72.3
gene3527	Cluster1	1.71371	2.0992	1.96852	2.31902	2.02511	0.0480105	349858						Q98QP6	Uracil phosphoribosyltransferase (EC 2.4.2.9) (UMP pyrophosphorylase) (UPRTase)	upp MYPU_3150	IPR005765, IPR029057	Uracil phosphoribosyl transferase, Phosphoribosyltransferase-like		G1WXJ7	IPR003593, IPR023214, IPR027417, IPR029057	AAA+ ATPase domain, HAD-like domain, P-loop containing nucleoside triphosphate hydrolase, Phosphoribosyltransferase-like	EGX54358.1		100	22.6	51.04	51.04
gene6745	Cluster1	1.8826	1.96127	1.93444	2.32144	2.02494	0.0301043	106290	GO:0008152, GO:0016787, GO:0033878	metabolic process, hydrolase activity, hormone-sensitive lipase activity	IPR013094	Alpha/beta hydrolase fold-3	Abhydrolase_3	P9WK87	Carboxylesterase NlhH (EC 3.1.1.1)	nlhH lipH Rv1399c	IPR013094, IPR029058	Alpha/beta hydrolase fold-3, Alpha/Beta hydrolase fold	mtu:Rv1399c	F9WYK7	IPR013094, IPR029058	Alpha/beta hydrolase fold-3, Alpha/Beta hydrolase fold	XP_003856962.1		100	32.03	50.14	50.14
gene10830	Cluster1	2.0125	2.31153	2.47403	1.29873	2.02419	0.202838	72937						A9MFG1	Arginine N-succinyltransferase (AST) (EC 2.3.1.109) (AOST)	astA SARI_01675	IPR007041, IPR016181, IPR017650	Arginine N-succinyltransferase AstA/AruG, Acyl-CoA N-acyltransferase, Arginine N-succinyltransferase	ses:SARI_01675					XM_003543474.2	100	32.91			97.3
gene89	Cluster1	2.13785	2.06027	1.58686	2.30378	2.02219	0.0709093	221618						B4F1K7	30S ribosomal protein S11	rpsK PMI3278	IPR001971, IPR018102, IPR019981	Ribosomal protein S11, Ribosomal S11, conserved site, Ribosomal protein S11, bacterial-type	pmr:PMI3278	A0A094C4S4	IPR011333	SKP1/BTB/POZ domain	KFY42445.1		77.45	41.67	35.8	35.8
gene6335	Cluster1	2.37538	2.04518	1.70977	1.94748	2.01945	0.0571067	329653			IPR011008	Dimeric alpha-beta barrel	Dimeric alpha+beta barrel	Q3JAF3	Ribosomal R small subunit methyltransferase A (EC 2.1.1.182) (16S rR (adenine(1518)-N(6)/adenine(1519)-N(6))-dimethyltransferase) (16S rR dimethyladenosine transferase) (16S rR dimethylase) (S-adenosylmethionine-6-N', N'-adenosyl(rR) dimethyltransferase)	rsmA ksgA Noc_1721	IPR001737, IPR011530, IPR020596, IPR020598, IPR023165, IPR029063	Ribosomal R adenine methyltransferase KsgA/Erm, Ribosomal R adenine dimethylase, Ribosomal R adenine methylase transferase, conserved site, Ribosomal R adenine methylase transferase, N-terminal, rR adenine dimethylase-like, S-adenosyl-L-methionine-dependent methyltransferase	noc:Noc_1721	X0KIB9	IPR011008, IPR025444	Dimeric alpha-beta barrel, Protein of unknown function DUF4188	EXM08406.1		100	43.24	38.54	38.54
gene6104	Cluster1	2.01233	1.74002	2.04274	2.27782	2.01823	0.0363564	355867	GO:0008152, GO:0016491, GO:0003824, GO:0005488, GO:0043738, GO:0043826, GO:0043883, GO:0051341	metabolic process, oxidoreductase activity, catalytic activity, binding, F420H2 dehydrogenase activity, sulfur oxygenase reductase activity, malolactic enzyme activity, regulation of oxidoreductase activity	IPR002198, IPR002347, IPR016040	Short-chain dehydrogenase/reductase SDR, Glucose/ribitol dehydrogenase, D(P)-binding	SDRFAMILY, GDHRDH, adh_short, D(P)-binding Rossmann-fold domains	O74628	Uncharacterized oxidoreductase C162.03 (EC 1.-.-.-)	SPCC162.03	IPR002198, IPR002347, IPR016040, IPR020904	Short-chain dehydrogenase/reductase SDR, Glucose/ribitol dehydrogenase, D(P)-binding domain, Short-chain dehydrogenase/reductase, conserved site	spo:SPCC162.03	W3XM62	IPR002198, IPR002347, IPR016040	Short-chain dehydrogenase/reductase SDR, Glucose/ribitol dehydrogenase, D(P)-binding domain	XP_007826951.1		99.09	42.54	90	90
gene8515	Cluster1	1.25339	2.43115	2.00621	2.38116	2.01798	0.221836	352154	GO:0003824, GO:0008152	catalytic activity, metabolic process	IPR000873	AMP-dependent synthetase and ligase	AMP-binding, AMP_BINDING	P86832	4-chlorobenzoate--CoA ligase (4-CBA:CoA ligase) (EC 6.2.1.33)	fcbA2	IPR000873, IPR020845, IPR025110	AMP-dependent synthetase/ligase, AMP-binding, conserved site, AMP-binding enzyme C-terminal domain		R1GHD4	IPR000873, IPR020845	AMP-dependent synthetase/ligase, AMP-binding, conserved site	XP_007587144.1	XM_001903549.1	99.41	25.53	28.75	28.75	89.8
gene901	Cluster1	1.45378	2.05722	1.01831	3.54171	2.01775	0.910233	272535	GO:0005524, GO:0015662, GO:0015992, GO:0016020, GO:0006810, GO:0006812, GO:0003824, GO:0008152, GO:0016021, GO:0016887, GO:0016820, GO:0008553	ATP binding, ATPase activity, coupled to transmembrane movement of ions, phosphorylative mechanism, proton transport, membrane, transport, cation transport, catalytic activity, metabolic process, integral to membrane, ATPase activity, hydrolase activity, acting on acid anhydrides, catalyzing transmembrane movement of substances, hydrogen-exporting ATPase activity, phosphorylative mechanism	IPR001757, IPR000695, IPR008250, IPR004014, IPR005834, IPR006534	ATPase, P-type, K/Mg/Cd/Cu/Zn/Na/Ca/Na/H-transporter, H+ transporting ATPase, proton pump, E1-E2 ATPase-associated region, ATPase, P-type cation-transporter, N-terminal, Haloacid dehalogenase-like hydrolase, Plasma-membrane proton-efflux P-type ATPase	CATATPASE, HATPASE, E1-E2_ATPase, Cation_ATPase_N, Hydrolase, ATPase_P-type: ATPase, P-type (transpor, ATPase-IIIA_H: plasma-membrane proton-e, ATPASE_E1_E2	P05030	Plasma membrane ATPase 1 (EC 3.6.3.6) (Proton pump 1)	PMA1 YGL008C	IPR001757, IPR004014, IPR006534, IPR008250, IPR018303, IPR023214, IPR023298, IPR023299	P-type ATPase, Cation-transporting P-type ATPase, N-terminal, P-type ATPase, subfamily IIIA, P-type ATPase, A domain, P-type ATPase, phosphorylation site, HAD-like domain, P-type ATPase, transmembrane domain, P-type ATPase, cytoplasmic domain N	sce:YGL008C	M7SN97	IPR001757, IPR004014, IPR006534, IPR008250, IPR018303, IPR023214, IPR023298, IPR023299	P-type ATPase, Cation-transporting P-type ATPase, N-terminal, P-type ATPase, subfamily IIIA, P-type ATPase, A domain, P-type ATPase, phosphorylation site, HAD-like domain, P-type ATPase, transmembrane domain, P-type ATPase, cytoplasmic domain N	XP_007793027.1	XM_006963748.1	100	55	81.25	81.25	79.95
NOV_001735	Cluster1	2.07802	2.00566	1.96468	2.01753	2.01647	0.00164703							P55540, J9NPA7	Cytochrome P450 BJ-4 homolog (EC 1.14.14.-), Deleted.	cyp117A2 NGR_a02740 y4kV,	IPR001128;IPR017972;IPR002403;,				PF15867;PF13877;					38.5, 45.8				,	,
gene4109	Cluster1	2.03605	2.44105	2.37141	1.21389	2.0156	0.237693	328218	GO:0005634, GO:0008270	nucleus, zinc ion binding	IPR001214, IPR002893	SET, Zinc finger, MYND-type	SET, zf-MYND, ZF_MYND_2	Q9H7B4	Histone-lysine N-methyltransferase SMYD3 (EC 2.1.1.43) (SET and MYND domain-containing protein 3) (Zinc finger MYND domain-containing protein 1)	SMYD3 ZMYND1 ZNFN3A1	IPR001214, IPR002893, IPR025805	SET domain, Zinc finger, MYND-type, Histone-lysine N-methyltransferase Smyd3	hsa:64754	R8BXC7	IPR001214	SET domain	XP_007911490.1		100	31.46	54.55	54.55
gene9088	Cluster1	2.10074	2.5999	2.046	1.30302	2.01241	0.214328	341410	GO:0004497, GO:0006118, GO:0006725, GO:0008152, GO:0016491, GO:0018658	monooxygenase activity, electron transport, aromatic compound metabolic process, metabolic process, oxidoreductase activity, salicylate 1-monooxygenase activity	IPR003042, IPR002938	Aromatic-ring hydroxylase, Monooxygenase, FAD-binding	RNGMNOXGSE, FAD_binding_3	P23262	Salicylate hydroxylase (EC 1.14.13.1) (Salicylate 1-monooxygenase)	nahG	IPR002938, IPR017631, IPR023753	FAD-binding domain, Salicylate 1-monooxygenase, FAD/D(P)-binding domain	pg:3974216	M7SEP0	IPR002938, IPR023753	FAD-binding domain, FAD/D(P)-binding domain	XP_007798246.1		100	38.71	71.05	71.05
gene10457	Cluster1	1.8669	2.22349	2.18306	1.76074	2.00855	0.0395314	266015	GO:0003824, GO:0004659, GO:0004661, GO:0008318, GO:0008412, GO:0008495, GO:0043766, GO:0043888, GO:0046428	catalytic activity, prenyltransferase activity, protein geranylgeranyltransferase activity, protein prenyltransferase activity, 4-hydroxybenzoate octaprenyltransferase activity, protoheme IX farnesyltransferase activity, Sep-tR:Cys-tR synthase activity, (S)-2,3-di-O-geranylgeranylglyceryl phosphate synthase activity, 1,4-dihydroxy-2-naphthoate octaprenyltransferase activity	IPR001330, IPR008930	Prenyltransferase/squalene oxidase, Terpenoid cylases/protein prenyltransferase alpha-alpha toroid	Prenyltrans, Terpenoid cyclases/Protein prenyltransferases	O13782	Protein farnesyltransferase subunit beta (FTase-beta) (EC 2.5.1.58) (CAAX farnesyltransferase subunit beta) (Ras proteins prenyltransferase subunit beta)	cpp1 SPAC17G6.04c	IPR001330, IPR008930, IPR026872	PFTB repeat, Terpenoid cyclases/protein prenyltransferase alpha-alpha toroid, Protein farnesyltransferase subunit beta	spo:SPAC17G6.04c	G2QHM6	IPR001330, IPR008930, IPR026872	PFTB repeat, Terpenoid cyclases/protein prenyltransferase alpha-alpha toroid, Protein farnesyltransferase subunit beta	XP_003664131.1	XM_003001719.1	100	52.78	77.14	77.14	85.42
gene4017	Cluster1	1.8233	2.08808	2.22898	1.88689	2.00681	0.0260055	69114	GO:0006508, GO:0008237, GO:0008270	proteolysis, metallopeptidase activity, zinc ion binding	IPR006025	Peptidase M, neutral zinc metallopeptidases, zinc-binding site	ZINC_PROTEASE	Q6GQM0	Melanoregulin	mreg si:ch211-51m24.2 zgc:91968	IPR031638	Melanoregulin	dre:431714	R8BX72	IPR013536	WLM domain	XP_007911453.1		100	34.72	28.57	28.57
gene2370	Cluster1	1.92813	0.670922	1.5144	3.90564	2.00477	1.4097	343533			IPR005123	2OG-Fe(II) oxygenase	2OG-FeII_Oxy	Q54RA4	Probable iron/ascorbate oxidoreductase DDB_G0283291 (EC 1.14.-.-)	DDB_G0283291	IPR002283, IPR005123, IPR026992, IPR027443	Isopenicillin N synthase, Oxoglutarate/iron-dependent dioxygenase, Non-haem dioxygenase N-terminal domain, Isopenicillin N synthase-like	ddi:DDB_G0283291	M7S8P7	IPR005123, IPR026992, IPR027443	Oxoglutarate/iron-dependent dioxygenase, Non-haem dioxygenase N-terminal domain, Isopenicillin N synthase-like	XP_007798413.1		100	36.36	70.19	70.19
gene5384	Cluster1	2.05118	2.20239	2.54816	1.19699	1.99968	0.24722	329142						Q9ILI6	Non-structural polyprotein 1A [Cleaved into: VPg; Protein p19; Transmembrane protein 1A; Serine protease p27 (p27) (EC 3.4.21.-); Protein p20']	ORF1	IPR009003	Peptidase S1, PA clan	vg:2943321	A0A086NFD4	IPR021765	Protein of unknown function DUF3328	KFG79852.1		100	55.56	47.25	47.25
gene8685	Cluster1	1.97559	2.30731	2.16941	1.53538	1.99692	0.0848925	73921	GO:0008152, GO:0016846	metabolic process, carbon-sulfur lyase activity	IPR006913	Glutathione-dependent formaldehyde-activating, GFA	DUF636	P0C1E8	Uncharacterized protein Cgl2355/cg2587 (EC 1.-.-.-)	Cgl2355 cg2587	IPR006140, IPR016040, IPR029753	D-isomer specific 2-hydroxyacid dehydrogenase, D-binding domain, D(P)-binding domain, D-isomer specific 2-hydroxyacid dehydrogenase, D-binding domain conserved site	cgl:NCgl2273, cgb:cg2587	W3XB56	IPR006140, IPR016040, IPR029752	D-isomer specific 2-hydroxyacid dehydrogenase, D-binding domain, D(P)-binding domain, D-isomer specific 2-hydroxyacid dehydrogenase, D-binding domain conserved site 1	XP_007831069.1		100	42.5	60.89	60.89
NOV_011788	Cluster1	2.66623	2.75682	1.12188	1.44272	1.99691	0.524566							I4ESU8	Uncharacterized protein	MODMU_1011					PF03167;,					38.5
NOV_008741	Cluster1	3.43085	0.840586	3.00631	0.680416	1.98954	1.53627								unknown_gene	unknown_gene	unknown_gene				PF01397;PF03936;									unknown_gene
gene7965	Cluster1	1.49906	2.41103	1.09181	2.95303	1.98873	0.538112	278980	GO:0010181, GO:0016491, GO:0003959	FMN binding, oxidoreductase activity, DPH dehydrogenase activity	IPR001155	DH:flavin oxidoreductase/DH oxidase, N-terminal	Oxidored_FMN	Q4WZ70	Chanoclavine-I aldehyde reductase (EC 1.3.1.100) (Old yellow enzyme 3 homolog)	fgaOx3 AFUA_2G17960	IPR001155, IPR013785	DH:flavin oxidoreductase/DH oxidase, N-terminal, Aldolase-type TIM barrel	afm:AFUA_2G17960	K1WTU1	IPR001155, IPR013785	DH:flavin oxidoreductase/DH oxidase, N-terminal, Aldolase-type TIM barrel	XP_007288062.1	XM_007839789.1	100	50.67	64.58	64.58	76.99
NOV_002163	Cluster1	0.674489	2.63024	2.6355	2.01369	1.98848	0.639425							Q96M93	Adenosine deaminase domain-containing protein 1 (Testis nuclear R-binding protein)	ADAD1 TENR	IPR002466;IPR014720;				PF00067;,					32				multicellular organism development [GO:0007275]; R processing [GO:0006396]; spermatid development [GO:0007286]	DOMAIN 96 164 DRBM. {ECO:0000255|PROSITE-ProRule:PRU00266}.; DOMAIN 249 574 A to I editase. {ECO:0000255|PROSITE-ProRule:PRU00240}.
gene2683	Cluster1	2.79202	1.8736	1.70973	1.56913	1.98612	0.228101	224040		unknown_gene		unknown_gene			unknown_gene			unknown_gene				unknown_gene			97.26
gene1890	Cluster1	2.08193	2.44381	1.32999	2.08518	1.98523	0.164744	67443						P75529	Ribonuclease R (RNase R) (EC 3.1.13.1) (VacB protein homolog)	rnr vacB MPN_243 MP589	IPR003029, IPR004476, IPR011129, IPR011805, IPR012340, IPR022966, IPR022967	S1 domain, Ribonuclease II/ribonuclease R, Cold shock protein, Ribonuclease R, Nucleic acid-binding, OB-fold, Ribonuclease II/R, conserved site, R-binding domain, S1	mpn:MPN243						100	32.61
gene3933	Cluster1	1.23382	1.16765	3.54536	1.97706	1.98097	0.916762	254355			IPR008949	Terpenoid synthase	Terpenoid synthases	B7K5I7	ATP synthase subunit delta (ATP synthase F(1) sector subunit delta) (F-type ATPase subunit delta) (F-ATPase subunit delta)	atpH atpD PCC8801_2719	IPR000711, IPR020781, IPR026015	ATPase, OSCP/delta subunit, ATPase, OSCP/delta subunit, conserved site, F1F0 ATP synthase OSCP/delta subunit, N-terminal domain	cyp:PCC8801_2719	X0CWK3	IPR005630, IPR008949	Terpene synthase, metal-binding domain, Isoprenoid synthase domain	EWZ91458.1		100	37.21	38.57	38.57
gene2961	Cluster1	1.09527	3.31618	2.60437	0.893422	1.97731	1.03465	355053		unknown_gene		unknown_gene			unknown_gene			unknown_gene		R8BJZ1		unknown_gene	XP_007915547.1		100		82.22	82.22
gene3134	Cluster1	2.77902	2.60573	1.21882	1.30031	1.97597	0.517817	321206		unknown_gene		unknown_gene			unknown_gene			unknown_gene				unknown_gene			91.11
gene8446	Cluster1	2.2012	1.66494	1.32999	2.70508	1.9753	0.27409	75165	GO:0003676, GO:0008270	nucleic acid binding, zinc ion binding	IPR000571	Zinc finger, CCCH-type	zf-CCCH							R8BI98	IPR000571	Zinc finger, CCCH-type	XP_007916183.1		100		35.44	35.44
gene11130	Cluster1	1.73734	2.14421	1.95681	2.0504	1.97219	0.0227747	358450		unknown_gene		unknown_gene			unknown_gene			unknown_gene		G2QXQ8		unknown_gene	XP_003648712.1	XM_013499390.1	100		75	75	94.74
gene2894	Cluster1	2.32671	2.25826	2.01899	1.27736	1.97033	0.173123	251067	GO:0016020	membrane	IPR000620	Protein of unknown function DUF6, transmembrane	DUF6	Q04835	Uncharacterized membrane protein YMR253C	YMR253C YM9920.07C	IPR000620	EamA domain	sce:YMR253C	L2FDA6	IPR000620	EamA domain	XP_007286913.1		89.73	29.27	44.87	44.87
NOV_003254	Cluster1	2.51444	2.04944	2.16436	1.14888	1.96928	0.253682							B7UWI9, S3BW66	Histidine--tR ligase (EC 6.1.1.21) (Histidyl-tR synthetase) (HisRS), Uncharacterized protein	hisS PLES_11721, F503_06321	IPR006195;IPR004154;IPR015807;IPR004516;IPR033656;,				unknown_gene					37, 42.4				histidyl-tR aminoacylation [GO:0006427],	,
gene2026	Cluster1	1.97412	2.85005	1.7837	1.26628	1.96854	0.326107	326760												W3X0T1	IPR019402	Frag1/DRAM/Sfk1	XP_007835612.1		100		69.32	69.32
gene1800	Cluster1	1.82421	2.16541	0.882528	2.98623	1.96459	0.568659	344401	GO:0004364	glutathione transferase activity	IPR004046, IPR004045, IPR010987, IPR012336	Glutathione S-transferase, C-terminal, Glutathione S-transferase, N-terminal, Glutathione S-transferase, C-terminal-like, Thioredoxin-like fold	GST_C, GST_N, Glutathione S-transferase (GST), C-terminal domain, Thioredoxin-like	P77526	Disulfide-bond oxidoreductase YfcG (EC 1.8.4.-) (GSH-dependent disulfide-bond oxidoreductase YfcG) (GST N1-1) (GST-like protein YfcG) (Organic hydroperoxidase) (EC 1.11.1.-)	yfcG b2302 JW2299	IPR004045, IPR004046, IPR010987, IPR012336	Glutathione S-transferase, N-terminal, Glutathione S-transferase, C-terminal, Glutathione S-transferase, C-terminal-like, Thioredoxin-like fold	ecj:JW2299, eco:b2302	G4MLL6	IPR004045, IPR004046, IPR010987, IPR012336	Glutathione S-transferase, N-terminal, Glutathione S-transferase, C-terminal, Glutathione S-transferase, C-terminal-like, Thioredoxin-like fold	XP_003709461.1	XM_014315453.1	94.74	67.5	91.3	91.3	86.81
gene2156	Cluster1	1.69257	1.81801	2.23554	2.10964	1.96394	0.0474831	297081	GO:0003677, GO:0005677, GO:0006342, GO:0006355, GO:0006476, GO:0008270, GO:0017136, GO:0051287, GO:0008939	D binding, chromatin silencing complex, chromatin silencing, regulation of transcription, D-dependent, protein amino acid deacetylation, zinc ion binding, D-dependent histone deacetylase activity, D binding, nicotinate-nucleotide-dimethylbenzimidazole phosphoribosyltransferase activity	IPR003000	D-dependent histone deacetylase, silent information regulator Sir2	SIR2, SIRTUIN	Q5AI90	D-dependent protein deacylase (EC 3.5.1.-) (Regulatory protein SIR2 homolog 5)	CaO19.10480 CaO19.2963	IPR003000, IPR026590, IPR026591, IPR027546, IPR029035	Sirtuin family, Sirtuin family, catalytic core domain, Sirtuin family, catalytic core small domain, Sirtuin, class III, DHS-like D/FAD-binding domain	cal:CaO19.10480, cal:CaO19.2963	N1QHM7	IPR003000, IPR026590, IPR026591, IPR029035	Sirtuin family, Sirtuin family, catalytic core domain, Sirtuin family, catalytic core small domain, DHS-like D/FAD-binding domain	EMF16746.1		100	47.57	55.45	55.45
gene4928	Cluster1	1.84926	2.14208	1.95395	1.90343	1.96218	0.0121586	69380						Q69140	Epstein-Barr nuclear antigen 6 (EB-6) (EBV nuclear antigen 6) (Epstein-Barr nuclear antigen 3C) (EB-3C) (EBV nuclear antigen 3C) (Epstein-Barr nuclear antigen 4B) (EB-4B) (EBV nuclear antigen 4B)	EB6 BERF3-BERF4	IPR007706	Epstein-Barr virus nuclear antigen 3	vg:5176150	Q6MFV9			CAE85479.1		100	51.22	27.22	27.22
NOV_001241	Cluster1	2.69041	2.0726	0.58032	2.49107	1.9586	0.682932							P39755	Probable DH-quinone oxidoreductase subunit 5 (EC 1.6.5.11) (DH dehydrogenase subunit 5)	ndhF ybxE BSU01830	IPR001750;IPR001516;				unknown_gene					32.7
gene9542	Cluster1	2.40915	2.1402	1.19741	2.08518	1.95799	0.207853	76192						P12919	Platelet-derived growth factor subunit B (PDGF subunit B) (PDGF-2) (Platelet-derived growth factor B chain) (Platelet-derived growth factor beta polypeptide) (Proto-oncogene c-Sis)	PDGFB SIS	IPR000072, IPR006782, IPR023581, IPR029034	PDGF/VEGF domain, Platelet-derived growth factor, N-terminal, Platelet-derived growth factor, conserved site, Cystine-knot cytokine							99.79	29.73
gene1273	Cluster1	1.66254	2.44653	2.74609	0.964174	1.95483	0.483673	66328		unknown_gene		unknown_gene			unknown_gene			unknown_gene		X0B2M2		unknown_gene	EXK76365.1		78.84		35.23	35.23
gene10846	Cluster1	1.59591	2.13004	1.83031	2.25458	1.95271	0.0662147	103345	GO:0003700, GO:0005634, GO:0006355, GO:0043565, GO:0046983	transcription factor activity, nucleus, regulation of transcription, D-dependent, sequence-specific D binding, protein dimerization activity	IPR011616, IPR004827	bZIP transcription factor, bZIP-1, Basic-leucine zipper (bZIP) transcription factor	bZIP_1, no description, BZIP, BZIP_BASIC							R8BJ08	IPR004827	Basic-leucine zipper domain	XP_007915904.1		100		85	85
gene3783	Cluster1	2.1811	2.08784	1.52399	1.9944	1.94683	0.0639555	52535												A0A084BZ99	IPR006913, IPR011057	Glutathione-dependent formaldehyde-activating enzyme/centromere protein V, Mss4-like	KEY82878.1		84.29		48.8	48.8
gene7081	Cluster1	1.42566	2.50877	2.44521	1.40008	1.94493	0.283674	330976						P53693	Protein rds1	rds1 SPAC343.12			spo:SPAC343.12	M7SMG9			XP_007795518.1	XM_003718875.1	100	50	74.69	74.69	73.76
gene6863	Cluster1	2.3441	1.72036	1.75596	1.95514	1.94389	0.0613948	227950	GO:0008152, GO:0016491, GO:0005215, GO:0006810, GO:0016021	metabolic process, oxidoreductase activity, transporter activity, transport, integral to membrane	IPR011701, IPR007114, IPR002198, IPR016196	Major facilitator superfamily MFS-1, Major facilitator superfamily, Short-chain dehydrogenase/reductase SDR, MFS general substrate transporter	MFS_1, MFS, ADH_SHORT, MFS general substrate transporter	Q10072	Uncharacterized transporter C3H1.06c	SPAC3H1.06c	IPR011701, IPR020846	Major facilitator superfamily, Major facilitator superfamily domain	spo:SPAC3H1.06c	A0A010QSZ7	IPR011701, IPR020846	Major facilitator superfamily, Major facilitator superfamily domain	XP_007593066.1		99.51	34.35	68.97	68.97
gene2206	Cluster1	1.54327	2.69509	2.40838	1.11726	1.941	0.405958	335085	GO:0003700, GO:0005634, GO:0006355, GO:0008270	transcription factor activity, nucleus, regulation of transcription, D-dependent, zinc ion binding	IPR001138	Fungal transcriptional regulatory protein, N-terminal	Zn_clus, no description, ZN2_CY6_FUNGAL_2, ZN2_CY6_FUNGAL_1, Zn2/Cys6 D-binding domain							A0A066XPT8			KDN70912.1		99.21		27.01	27.01
NOV_010722	Cluster1	1.95643	2.11069	1.92141	1.76601	1.93863	0.0150036							A0KPP9, K2S0I4	Ribosomal R small subunit methyltransferase C (EC 2.1.1.172) (16S rR m2G1207 methyltransferase) (rR (guanine-N(2)-)-methyltransferase RsmC), 1,2-dihydroxy-3-keto-5-methylthiopentene dioxygenase (EC 1.13.11.54) (Acireductone dioxygenase (Fe(2+)-requiring))	rsmC AHA_3802, ADI1 MPH_06815	IPR002052;IPR013675;IPR023543;IPR029063;IPR007848;, IPR004313;IPR027496;IPR014710;IPR011051;				PF00520;					33.5, 38.5				, L-methionine biosynthetic process from methylthioadenosine [GO:0019509]	,
gene3539	Cluster1	1.13983	1.99386	2.00637	2.60497	1.93626	0.272428	337116	GO:0009058, GO:0016740	biosynthetic process, transferase activity	IPR002060, IPR017825, IPR008949	Squalene/phytoene synthase, Lycopene cyclase region, Terpenoid synthase	SQS_PSY, CarR_dom_SF: lycopene cyclase domain, SQUALEN_PHYTOEN_SYN_2, Terpenoid synthases	B2ATB0	Bifunctional lycopene cyclase/phytoene synthase [Includes: Lycopene beta-cyclase (EC 5.5.1.19) (Lycopene cyclase); Phytoene synthase (EC 2.5.1.32)]	PODANS_1_15240	IPR002060, IPR008949, IPR017825, IPR019845	Squalene/phytoene synthase, Isoprenoid synthase domain, Lycopene cyclase domain, Squalene/phytoene synthase, conserved site	pan:PODANSg3995	A0A090CF73	IPR002060, IPR008949, IPR017825, IPR019845	Squalene/phytoene synthase, Isoprenoid synthase domain, Lycopene cyclase domain, Squalene/phytoene synthase, conserved site	XP_001906962.1	XM_003838425.1	95.28	50.62	50.62	50.62	100
gene2466	Cluster1	1.32364	0.651823	2.25224	3.51434	1.93551	1.15382	269961	GO:0016491, GO:0043738, GO:0043826, GO:0043883, GO:0051341	oxidoreductase activity, F420H2 dehydrogenase activity, sulfur oxygenase reductase activity, malolactic enzyme activity, regulation of oxidoreductase activity	IPR001395	Aldo/keto reductase	AR71_RAT_P38918;, ALDKETRDTASE, Aldo_ket_red, D(P)-linked oxidoreductase	O95154	Aflatoxin B1 aldehyde reductase member 3 (EC 1.-.-.-) (AFB1 aldehyde reductase 2) (AFB1-AR 2)	AKR7A3 AFAR2	IPR001395, IPR023210	Aldo/keto reductase/potassium channel subunit beta, DP-dependent oxidoreductase domain	hsa:22977	E9EGH5	IPR001395, IPR023210	Aldo/keto reductase/potassium channel subunit beta, DP-dependent oxidoreductase domain	XP_007815313.1		86.72	34.65	45.72	45.72
gene11064	Cluster1	1.49748	1.72892	0.456279	4.04824	1.93273	1.72157	296388			IPR016215, IPR011251	Nitrilotriacetate monooxygenase component A/pristinamycin IIA synthase subunit A, Bacterial luciferase-like	Nitrilotriacetate monooxygenase component A/pristinamycin IIA synthase subunit A, Bacterial luciferase-like	P54989	Nitrilotriacetate monooxygenase component A (NTA monooxygenase component A) (NTA-MO A) (EC 1.14.14.10)	ntaA nmoA	IPR011251, IPR016215	Luciferase-like domain, Nitrilotriacetate monooxygenase component A/pristinamycin IIA synthase subunit A		H6C870	IPR011251, IPR016215	Luciferase-like domain, Nitrilotriacetate monooxygenase component A/pristinamycin IIA synthase subunit A	XP_009160758.1	XM_006969246.1	100	46	81.74	81.74	74.41
gene30	Cluster1	1.87273	2.28995	2.13395	1.43358	1.93255	0.105211	244760												F0XNX5	IPR007300	CidB/LrgB family	EFX00423.1	XM_001230030.1	100		36.69	36.69	94.74
NOV_012739	Cluster1	2.07151	1.68487	2.04577	1.92789	1.93251	0.0233746							B1XNE1	Biotin synthase (EC 2.8.1.6)	bioB SYNPCC7002_A0309	IPR013785;IPR010722;IPR002684;IPR024177;IPR006638;IPR007197;				PF01171;, PF14529;PF00078;					30.4				biotin biosynthetic process [GO:0009102]
NOV_007975	Cluster1	2.17549	2.80497	2.76788	-0.0239626	1.9311	1.33646							A7IAH1	D-directed R polymerase subunit N (EC 2.7.7.6)	rpoN Mboo_2218	IPR009057;IPR023580;IPR020789;IPR000268;				PF04055;					30				transcription, D-templated [GO:0006351]
gene8207	Cluster1	0.788722	2.80923	2.13774	1.9843	1.93	0.530418	293099	GO:0004476, GO:0005975, GO:0008270	mannose-6-phosphate isomerase activity, carbohydrate metabolic process, zinc ion binding	IPR001250, IPR016305, IPR011051	Mannose-6-phosphate isomerase, type I, Mannose-6-phosphate isomerase, Cupin, RmlC-type	MAN6PISMRASE, PMI_typeI, Mannose-6-phosphate isomerase, manA: mannose-6-phosphate isomerase, class I, RmlC-like cupins	O43014	Mannose-6-phosphate isomerase (EC 5.3.1.8) (Phosphohexomutase) (Phosphomannose isomerase) (PMI)	pmi40 SPBC2G2.16	IPR001250, IPR011051, IPR014710, IPR016305, IPR018050	Mannose-6-phosphate isomerase, type I, RmlC-like cupin domain, RmlC-like jelly roll fold, Mannose-6-phosphate isomerase, Phosphomannose isomerase, type I, conserved site	spo:SPBC2G2.16	G2QJA2	IPR001250, IPR011051, IPR014710, IPR016305	Mannose-6-phosphate isomerase, type I, RmlC-like cupin domain, RmlC-like jelly roll fold, Mannose-6-phosphate isomerase	XP_003664904.1	XM_008096385.1	100	39.36	71.88	71.88	72.38
gene4905	Cluster1	1.61655	2.34335	1.81196	1.94404	1.92898	0.0708091	328260						Q4R5A4	UPF0705 protein C11orf49 homolog	QccE-10352			mcf:101865906	W7I5E4	IPR023214, IPR027417, IPR029057	HAD-like domain, P-loop containing nucleoside triphosphate hydrolase, Phosphoribosyltransferase-like	EWC47687.1		95.11	35.09	26.71	26.71
gene119	Cluster1	1.0547	2.42397	2.8983	1.32993	1.92673	0.576953	354072						Q99031	Pesticidal crystal protein Cry9Aa (130 kDa crystal protein) (Crystaline entomocidal protoxin) (Insecticidal delta-endotoxin CryIXA(a))	cry9Aa cryIG cryIVA(a)	IPR001178, IPR005638, IPR005639, IPR008979, IPR015790	Delta endotoxin, central domain, Delta endotoxin, C-terminal, Delta endotoxin, N-terminal, Galactose-binding domain-like, Delta endotoxin, central domain, subgroup 1		L2FLF5	IPR000719, IPR011009	Protein kinase domain, Protein kinase-like domain	XP_007284362.1		100	36.67	50	50
gene9311	Cluster1	2.1233	1.9365	2.03581	1.59373	1.92234	0.0403616	347569			IPR008972	Cupredoxin	Cupredoxins	A6VHF1	Tetrahydromethanopterin S-methyltransferase subunit B (EC 2.1.1.86) (N5-methyltetrahydromethanopterin--coenzyme M methyltransferase subunit B)	mtrB MmarC7_0810	IPR008690	Tetrahydromethanopterin S-methyltransferase subunit B	mmz:MmarC7_0810	A0A093YJF3	IPR008972	Cupredoxin	KFY05024.1	XM_005192352.3	100	40.62	43.12	43.12	100
NOV_011526	Cluster1	1.30376	2.73341	1.85279	1.79406	1.921	0.265437							Q6CMK7, R1EUZ1	Delta 8-(E)-sphingolipid desaturase (EC 1.14.19.18), Putative fatty acid desaturase protein	SLD KLLA0E19471g, UCRNP2_1793	IPR001199;IPR012171;IPR005804;, IPR001199;IPR012171;IPR005804;				PF03184;PF05225;PF03221;					315, 515				sphingolipid metabolic process [GO:0006665], lipid metabolic process [GO:0006629]	DOMAIN 2 77 Cytochrome b5 heme-binding. {ECO:0000255|PROSITE-ProRule:PRU00279}., DOMAIN 4 79 Cytochrome b5 heme-binding. {ECO:0000259|PROSITE:PS50255}.
gene8279	Cluster1	1.66881	1.44021	2.41421	2.14701	1.91756	0.147261	74155		unknown_gene		unknown_gene			unknown_gene			unknown_gene				unknown_gene
NOV_002351	Cluster1	1.68316	1.23686	2.63526	2.11425	1.91738	0.268018							P41878	26S proteasome regulatory subunit rpn11 (Protein pad1)	rpn11 bfr2 pad1 sks1 SPAC31G5.13	IPR000555;IPR024969;				PF00687;, PF15979;					30.8				proteasome-mediated ubiquitin-dependent protein catabolic process [GO:0043161]; protein deubiquitination [GO:0016579]; response to antibiotic [GO:0046677]; response to cycloheximide [GO:0046898]
gene10817	Cluster1	2.10982	1.51877	0.172216	3.86307	1.91597	1.7568	358178			IPR006175, IPR013813	Endoribonuclease L-PSP, Endoribonuclease L-PSP/chorismate mutase-like	Ribonuc_L-PSP, YjgF-like	Q9UR06	Protein mmf2, mitochondrial (Maintenance of mitochondrial function 2)	mmf2 hpm1 SPAC1039.10 SPAC922.01	IPR006056, IPR006175, IPR013813	RidA family, YjgF/YER057c/UK114 family, Endoribonuclease L-PSP/chorismate mutase-like	spo:SPAC1039.10	G9MSY2	IPR006175, IPR013813	YjgF/YER057c/UK114 family, Endoribonuclease L-PSP/chorismate mutase-like	XP_003191021.1		100	55.84	94.52	93.24
NOV_006986	Cluster1	1.43788	2.07309	1.59865	2.55065	1.91507	0.18919							Q9LN59, A0A084PD43	Putative wall-associated receptor kinase-like 11 (EC 2.7.11.-), Deleted.	WAKL11 At1g19390 F18O14.11,	IPR013320;IPR018097;IPR011009;IPR000719;IPR008271;IPR013695;IPR025287;,				unknown_gene					45.8, 215				cell surface receptor signaling pathway [GO:0007166],	DOMAIN 451 726 Protein kinase. {ECO:0000255|PROSITE-ProRule:PRU00159}.,
gene2338	Cluster1	1.47656	2.1572	2.9495	1.06169	1.91124	0.512294	335052		unknown_gene		unknown_gene			unknown_gene			unknown_gene				unknown_gene			100
NOV_012525	Cluster1	2.5071	1.08339	2.13988	1.91431	1.91117	0.273169							M7SY51	Uncharacterized protein	UCREL1_1406					PF00298;PF03946;					45.4
gene9735	Cluster1	1.38126	2.10835	1.49222	2.6522	1.90851	0.261075	224883	GO:0003676	nucleic acid binding	IPR000504	R recognition motif, RNP-1	RRM_1, no description, RRM	Q9LIS2	Glycine-rich R-binding protein 4, mitochondrial (AtGR-RBP4) (AtRBG4) (Glycine-rich protein 4) (AtGRP4) (Mitochondrial R-binding protein 1b) (At-mRBP1b)	RBG4 GR-RBP4 GRP4 MRBP1B At3g23830 F14O13_2	IPR000504, IPR012677	R recognition motif domain, Nucleotide-binding alpha-beta plait domain	ath:AT3G23830	R8BDC3	IPR000504, IPR012677	R recognition motif domain, Nucleotide-binding alpha-beta plait domain	XP_007917921.1		100	34.78	60.87	60.87
gene7430	Cluster1	2.02916	2.18755	1.62499	1.78471	1.9066	0.0470292	216321	GO:0003700, GO:0005634, GO:0006355, GO:0008270, GO:0003677, GO:0006350	transcription factor activity, nucleus, regulation of transcription, D-dependent, zinc ion binding, D binding, transcription	IPR001138, IPR007219	Fungal transcriptional regulatory protein, N-terminal, Fungal specific transcription factor	FUNGALZNCYS, Zn_clus, Fungal_trans, no description, ZN2_CY6_FUNGAL_2, ZN2_CY6_FUNGAL_1, Zn2/Cys6 D-binding domain	P87000	Transcriptional activator protein acu-15 (Acetate utilization protein 15)	acu-15 18A7.170 NCU06656	IPR001138, IPR007219	Zn(2)-C6 fungal-type D-binding domain, Transcription factor domain, fungi	ncr:NCU06656	A0A086NPY3	IPR001138, IPR007219	Zn(2)-C6 fungal-type D-binding domain, Transcription factor domain, fungi	KFG83201.1		100	35.71	62.9	62.9
gene5464	Cluster1	2.39897	1.68631	1.79408	1.74601	1.90634	0.0823506	338852	GO:0031177, GO:0048037, GO:0008152, GO:0003824, GO:0005488	phosphopantetheine binding, cofactor binding, metabolic process, catalytic activity, binding	IPR014030, IPR014043, IPR014031, IPR013968, IPR006163, IPR006162, IPR003006, IPR009081, IPR016040, IPR016035, IPR016039, IPR016036	Beta-ketoacyl synthase, N-terminal, Acyl transferase, Beta-ketoacyl synthase, C-terminal, Polyketide synthase, KR, Phosphopantetheine-binding, Phosphopantetheine attachment site, Immunoglobulin/major histocompatibility complex, conserved site, Acyl carrier protein-like, D(P)-binding, Acyl transferase/acyl hydrolase/lysophospholipase, Thiolase-like, Malonyl-CoA ACP transacylase, ACP-binding	ketoacyl-synt, Acyl_transf_1, Ketoacyl-synt_C, KR, ACP_DOMAIN, PHOSPHOPANTETHEINE, IG_MHC, B_KETOACYL_SYNTHASE, ACP-like, D(P)-binding Rossmann-fold domains, FabD/lysophospholipase-like, Thiolase-like, Probable ACP-binding domain of malonyl-CoA ACP transacylase	Q4WAZ9	Nonribosomal peptide synthetase 14 (EC 6.3.2.-)	NRPS14 pesO AFUA_8G00540	IPR000873, IPR001227, IPR001242, IPR009081, IPR013120, IPR013968, IPR014030, IPR014031, IPR014043, IPR016035, IPR016036, IPR016039, IPR016040, IPR018201, IPR020801, IPR020806, IPR020807, IPR020841, IPR020845, IPR029063	AMP-dependent synthetase/ligase, Acyl transferase domain, Condensation domain, Acyl carrier protein-like, Male sterility, D-binding, Polyketide synthase, ketoreductase domain, Beta-ketoacyl synthase, N-terminal, Beta-ketoacyl synthase, C-terminal, Acyl transferase, Acyl transferase/acyl hydrolase/lysophospholipase, Malonyl-CoA ACP transacylase, ACP-binding, Thiolase-like, D(P)-binding domain, Bet…	afm:AFUA_8G00540	G4UWQ1	IPR001227, IPR006162, IPR009081, IPR013968, IPR014030, IPR014031, IPR014043, IPR016035, IPR016036, IPR016039, IPR016040, IPR018201, IPR020801, IPR020807, IPR020841, IPR029063	Acyl transferase domain, Phosphopantetheine attachment site, Acyl carrier protein-like, Polyketide synthase, ketoreductase domain, Beta-ketoacyl synthase, N-terminal, Beta-ketoacyl synthase, C-terminal, Acyl transferase, Acyl transferase/acyl hydrolase/lysophospholipase, Malonyl-CoA ACP transacylase, ACP-binding, Thiolase-like, D(P)-binding domain, Beta-ketoacyl synthase, active site, Polyketide …	XP_009853076.1		100	51.65	75.1	75.1
NOV_007955	Cluster1	2.785	0.990546	1.91671	1.90819	1.90011	0.402671							O13957	Uncharacterized protein C23H4.16c	SPAC23H4.16c					PF02335;					32.7
gene1396	Cluster1	1.51614	2.1654	2.5176	1.39989	1.89976	0.21233	243577			IPR002110	Ankyrin	ANKYRIN, Ank, no description, ANK_REPEAT, ANK_REP_REGION, Ankyrin repeat	Q8Q0U0	Putative ankyrin repeat protein MM_0045	MM_0045	IPR002110, IPR020683	Ankyrin repeat, Ankyrin repeat-containing domain	mma:MM_0045	S0DRK6	IPR002110, IPR020683	Ankyrin repeat, Ankyrin repeat-containing domain	CCT63193.1		100	37.5	51.25	51.25
gene8679	Cluster1	1.69097	2.02924	1.62599	2.24505	1.89781	0.0636296	49443	GO:0004497, GO:0005506, GO:0006118, GO:0020037	monooxygenase activity, iron ion binding, electron transport, heme binding	IPR001128, IPR002401	Cytochrome P450, Cytochrome P450, E-class, group I	P450, EP450I, p450, CYTOCHROME_P450, Cytochrome P450	Q4WAW8	Fumitremorgin C synthase (EC 1.14.21.10) (Fumitremorgin biosynthesis protein E)	ftmP450-2 ftmE AFUA_8G00220	IPR001128, IPR002401	Cytochrome P450, Cytochrome P450, E-class, group I	afm:AFUA_8G00220	W7E829	IPR001128, IPR002401, IPR017972	Cytochrome P450, Cytochrome P450, E-class, group I, Cytochrome P450, conserved site	EUN23274.1	XM_007828889.1	100	30.21	70.49	70.49	71.19
gene8638	Cluster1	2.25446	1.97713	1.82618	1.51328	1.89276	0.0715959	347048			IPR004813, IPR004648	Oligopeptide transporter OPT superfamily, Tetrapeptide transporter, OPT1/isp4	OPT, ISP4_OPT: small oligopeptide transporter, OP, OPT_sfam: oligopeptide transporters, OPT sup	O23482	Oligopeptide transporter 3 (AtOPT3)	OPT3 At4g16370 dl4215c FCAALL.72	IPR004648, IPR004813	Tetrapeptide transporter, OPT1/isp4, Oligopeptide transporter, OPT superfamily	ath:AT4G16370	A2QW30	IPR004648, IPR004813	Tetrapeptide transporter, OPT1/isp4, Oligopeptide transporter, OPT superfamily	XP_001394363.1	XM_001394326.1	99.6	34.81	51.27	51.27	84.26
gene8003	Cluster1	0.463969	0.655816	3.32765	3.1222	1.89241	1.78547	73663			IPR013700	Aflatoxin regulatory protein	AflR	P43651	Aflatoxin biosynthesis regulatory protein	aflR apa-2	IPR001138, IPR002409, IPR013700	Zn(2)-C6 fungal-type D-binding domain, Aflatoxin biosynthesis regulatory protein, Aflatoxin regulatory protein		A0A094AKT3	IPR001138, IPR002409, IPR013700	Zn(2)-C6 fungal-type D-binding domain, Aflatoxin biosynthesis regulatory protein, Aflatoxin regulatory protein	KFY27883.1		100	31.22	36.95	36.95
gene2222	Cluster1	2.12958	1.56367	1.98346	1.88733	1.89101	0.0431564	269494						Q924W5	Structural maintenance of chromosomes protein 6 (SMC protein 6) (SMC-6) (mSMC6)	Smc6 Kiaa4103 Smc6l1	IPR003395, IPR027132, IPR027417	RecF/RecN/SMC, N-terminal, Structural maintenance of chromosomes protein 6, P-loop containing nucleoside triphosphate hydrolase	mmu:67241	X0HV85			EGU78761.1		100	38.71	63.89	63.89
gene5621	Cluster1	1.58535	1.08123	1.95053	2.94339	1.89013	0.465053	68088		unknown_gene		unknown_gene			unknown_gene			unknown_gene		W7IH64		unknown_gene	EWC48580.1		100		35.76	35.76
NOV_003912	Cluster1	2.18186	1.66671	1.81488	1.87836	1.88546	0.0351838							B6IZ80, G4MQ16	Serine hydroxymethyltransferase (SHMT) (Serine methylase) (EC 2.1.2.1), Uncharacterized protein	glyA CbuG_0597, MGG_16076 MGG_17019	IPR015424;IPR015421;IPR015422;IPR001085;IPR019798;,				PF00385;,					33.5, 68.9				glycine biosynthetic process from serine [GO:0019264]; tetrahydrofolate interconversion [GO:0035999],	,
gene9046	Cluster1	1.58503	2.37031	1.48378	2.09712	1.88406	0.132871	332448	GO:0003735, GO:0005622, GO:0005840, GO:0006412	structural constituent of ribosome, intracellular, ribosome, translation	IPR005825	Ribosomal protein L24/L26, conserved site	RIBOSOMAL_L24												100
gene6784	Cluster1	1.62522	1.57106	1.4162	2.9156	1.88202	0.361981	339784	GO:0015205, GO:0015931, GO:0016020	nucleobase transmembrane transporter activity, nucleobase, nucleoside, nucleotide and nucleic acid transport, membrane	IPR001248	Permease for cytosine/purines, uracil, thiamine, allantoin	Transp_cyt_pur	P05316	Uracil permease	FUR4 YBR021W YBR0303	IPR001248, IPR012681	Purine-cytosine permease, Nucleobase cation symporter-1, NCS1	sce:YBR021W	L2G1Q0	IPR001248, IPR012681	Purine-cytosine permease, Nucleobase cation symporter-1, NCS1	XP_007278995.1		100	36.99	75	75
gene1905	Cluster1	2.09004	2.15969	1.49304	1.77693	1.87992	0.0706763	225273						B4GT53	Dynein assembly factor 1, axonemal homolog (Defective transmitter-recycling protein) (Leucine-rich repeat-containing protein 50 homolog)	dtr GL26663	IPR001611, IPR032675	Leucine-rich repeat, Leucine-rich repeat domain, L domain-like	dpe:Dper_GL26663	F0XE27	IPR022099, IPR022105	Protein of unknown function DUF3638, Protein of unknown function DUF3645	EFX03462.1		100	30.49	61.3	61.3
gene9844	Cluster1	1.90133	2.25099	1.50032	1.86365	1.87907	0.0706265	72693		unknown_gene		unknown_gene			unknown_gene			unknown_gene				unknown_gene			100
NOV_004451	Cluster1	1.82327	2.18689	1.88695	1.61815	1.87881	0.0415017							P10236	D primase (EC 2.7.7.-)	UL52	IPR033685;				PF02028;,					32.3				bidirectional double-stranded viral D replication [GO:0039686]
gene3330	Cluster1	2.36887	2.12703	1.34908	1.6685	1.87837	0.156654	224021						Q6BLT4	Protein EFR3	EFR3 DEHA2F10890g	IPR011989	Armadillo-like helical	dha:DEHA2F10890g	G4NJU1			XP_003721214.1		100	58.33	48.08	48.08
gene2841	Cluster1	1.57243	2.11221	1.73103	2.08646	1.87553	0.053314	249584			IPR005135	Endonuclease/exonuclease/phosphatase	Exo_endo_phos, DNase I-like	A2T6Y4	D-(apurinic or apyrimidinic site) lyase (EC 3.1.-.-) (EC 4.2.99.18) (APEX nuclease) (APEN) (Apurinic-apyrimidinic endonuclease 1) (AP endonuclease 1) (REF-1) (Redox factor-1) [Cleaved into: D-(apurinic or apyrimidinic site) lyase, mitochondrial]	APEX1 APE APEX BAP1 REF1	IPR004808, IPR005135, IPR020847, IPR020848	AP endonuclease 1, Endonuclease/exonuclease/phosphatase, AP endonuclease 1, binding site, AP endonuclease 1, conserved site	ptr:465200	B2ACJ8	IPR004808, IPR005135	AP endonuclease 1, Endonuclease/exonuclease/phosphatase	XP_001903388.1		95.33	23.48	55.04	55.04
gene3748	Cluster1	1.43541	2.55408	2.18065	1.29303	1.86579	0.27154	327571												G2YM07	IPR000612	Proteolipid membrane potential modulator	XP_001552205.1		81.82		59.42	59.42
NOV_013067	Cluster1	2.60329	2.47985	1.47168	0.907227	1.86551	0.498786							A7MYW9	Sugar fermentation stimulation protein homolog	sfsA VIBHAR_03445	IPR005224;				PF03547;					36.6
gene3459	Cluster1	1.97056	1.95926	1.48924	2.0418	1.86521	0.0481204	354935						Q8EPB4	D kinase 2 (EC 2.7.1.23) (ATP-dependent D kinase 2)	nadK2 OB2196	IPR002504, IPR016064, IPR017437, IPR017438	D kinase, D kinase/diacylglycerol kinase-like domain, ATP-D kinase, PpnK-type, all-beta, Inorganic polyphosphate/ATP-D kinase, domain 1		W9XZT3			XP_007734604.1		100	42.86	48.94	48.94
gene2525	Cluster1	0.968074	2.97261	2.90371	0.615678	1.86502	1.16775	335139	GO:0004497, GO:0005506, GO:0006118, GO:0020037	monooxygenase activity, iron ion binding, electron transport, heme binding	IPR001128	Cytochrome P450	p450, Cytochrome P450	O94142	Ent-kaurene oxidase (EC 1.14.13.78) (Cytochrome P450 503A1) (Cytochrome P450-4)	CYP503A1	IPR001128, IPR002401	Cytochrome P450, Cytochrome P450, E-class, group I		B8MQB1	IPR001128, IPR002403, IPR017972	Cytochrome P450, Cytochrome P450, E-class, group IV, Cytochrome P450, conserved site	XP_002487424.1		100	27.65	58.33	58.33
gene10705	Cluster1	1.23413	2.37471	1.81869	2.02997	1.86438	0.171791	295517	GO:0005488, GO:0006810, GO:0016020, GO:0005743	binding, transport, membrane, mitochondrial inner membrane	IPR002067, IPR001993	Mitochondrial carrier protein, Mitochondrial substrate carrier	MITOCARRIER, Mito_carr, SOLCAR, Mitochondrial carrier	P23641	Mitochondrial phosphate carrier protein (Mitochondrial import receptor) (Phosphate transport protein) (PTP) (mPic 1) (p32) [Cleaved into: Mitochondrial phosphate carrier protein, N-terminally processed]	MIR1 YJR077C J1837	IPR002067, IPR018108, IPR023395	Mitochondrial carrier protein, Mitochondrial substrate/solute carrier, Mitochondrial carrier domain	sce:YJR077C	A0A010RV75	IPR002067, IPR018108, IPR023395	Mitochondrial carrier protein, Mitochondrial substrate/solute carrier, Mitochondrial carrier domain	XP_007600183.1	XM_008098087.1	100	52.19	86.93	86.93	79.18
NOV_010089	Cluster1	2.52225	1.17215	2.26211	1.49673	1.86331	0.301334							P91793, K3V7E2	Defensin-A (AaDef), Uncharacterized protein	DEFA AAEL003841, FPSE_10428	IPR001542;IPR003614;,				PF02272;PF01411;PF07973;					31.6, 48.1				defense response to bacterium [GO:0042742]; defense response to Gram-negative bacterium [GO:0050829]; defense response to Gram-positive bacterium [GO:0050830]; innate immune response [GO:0045087],	,
gene2557	Cluster1	1.62036	2.16412	1.90168	1.76411	1.86257	0.0402063	343623												R8BWZ7	IPR010640	Low temperature requirement A	XP_007911283.1		97.75		54.55	54.55
gene11282	Cluster1	1.30293	1.87925	2.24584	2.0055	1.85838	0.120182	48150	GO:0003700, GO:0005634, GO:0006355, GO:0008270, GO:0003676, GO:0005622	transcription factor activity, nucleus, regulation of transcription, D-dependent, zinc ion binding, nucleic acid binding, intracellular	IPR007087, IPR001138, IPR015880	Zinc finger, C2H2-type, Fungal transcriptional regulatory protein, N-terminal, Zinc finger, C2H2-like	zf-C2H2, Zn_clus, no description, ZN2_CY6_FUNGAL_2, ZINC_FINGER_C2H2_2, ZINC_FINGER_C2H2_1, ZN2_CY6_FUNGAL_1, Zn2/Cys6 D-binding domain	Q9UTS5	Zinc finger protein zas1	zas1 SPBC1198.04c	IPR007087, IPR007219, IPR013087, IPR015880	Zinc finger, C2H2, Transcription factor domain, fungi, Zinc finger C2H2-type/integrase D-binding domain, Zinc finger, C2H2-like	spo:SPBC1198.04c	E3QDW8	IPR001138, IPR007087, IPR013087, IPR015880	Zn(2)-C6 fungal-type D-binding domain, Zinc finger, C2H2, Zinc finger C2H2-type/integrase D-binding domain, Zinc finger, C2H2-like	EFQ29056.1		100	55.17	85.19	85.19
gene11099	Cluster1	1.82523	1.68059	1.5103	2.41179	1.85698	0.115029	353639	GO:0020037, GO:0033754	heme binding, indoleamine 2,3-dioxygenase activity	IPR000898	Indoleamine 2,3-dioxygenase	IDO, IDO_1	P47125	Indoleamine 2,3-dioxygenase (IDO) (EC 1.13.11.52) (Biosynthesis of nicotinic acid protein 2)	B2 YJR078W J1840	IPR000898	Indoleamine 2,3-dioxygenase	sce:YJR078W	F7W5S5	IPR000898	Indoleamine 2,3-dioxygenase	XP_003344397.1	XM_007797449.1	100	41.06	71.13	71.13	77.65
gene3229	Cluster1	1.96104	2.47112	1.92178	1.05888	1.85321	0.257274	327762	GO:0003676, GO:0004386, GO:0005524, GO:0004190, GO:0006508, GO:0008026, GO:0000810, GO:0004787, GO:0008413, GO:0008758, GO:0008796, GO:0008828, GO:0016462, GO:0019176, GO:0019177, GO:0043141	nucleic acid binding, helicase activity, ATP binding, aspartic-type endopeptidase activity, proteolysis, ATP-dependent helicase activity, diacylglycerol pyrophosphate phosphatase activity, thiamin-pyrophosphatase activity, 8-oxo-7,8-dihydroguanine triphosphatase activity, UDP-2,3-diacylglucosamine hydrolase activity, bis(5'-nucleosyl)-tetraphosphatase activity, dATP pyrophosphohydrolase activity,…	IPR011545, IPR001650, IPR014001, IPR014021, IPR001969	D/R helicase, DEAD/DEAH box type, N-terminal, D/R helicase, C-terminal, DEAD-like helicase, N-terminal, Helicase, superfamily 1 and 2, ATP-binding, Peptidase aspartic, active site	DEAD, Helicase_C, no description, HELICASE_ATP_BIND_1, HELICASE_CTER, ASP_PROTEASE	Q8VID5	ATP-dependent D helicase Q5 (EC 3.6.4.12) (D helicase, RecQ-like type 5) (RecQ5) (RECQL5beta) (RecQ protein-like 5)	Recql5	IPR001650, IPR002464, IPR004589, IPR010716, IPR011545, IPR011991, IPR014001, IPR027417, IPR032284	Helicase, C-terminal, D/R helicase, ATP-dependent, DEAH-box type, conserved site, D helicase, ATP-dependent, RecQ type, RecQ helicase-like 5, DEAD/DEAH box helicase domain, Winged helix-turn-helix D-binding domain, Helicase superfamily 1/2, ATP-binding domain, P-loop containing nucleoside triphosphate hydrolase, ATP-dependent D helicase RecQ, zinc-binding domain	mmu:170472	A0A016PQW6	IPR001650, IPR014001, IPR015880, IPR022698, IPR027417	Helicase, C-terminal, Helicase superfamily 1/2, ATP-binding domain, Zinc finger, C2H2-like, Protein of unknown function DUF3505, P-loop containing nucleoside triphosphate hydrolase	EYB28035.1		88.51	29.03	54.67	54.67
NOV_008033	Cluster1	2.04715	2.0995	1.42064	1.83382	1.85028	0.0714315							E2IUA8, V7BSC1	Friedelin synthase (KdFRS) (EC 5.4.99.50), D topoisomerase 2 (EC 5.99.1.3)	, PHAVU_005G024200g	IPR032696;IPR032697;IPR018333;IPR002365;IPR008930;, IPR024946;IPR003594;IPR020568;IPR014721;IPR001241;IPR013760;IPR002205;IPR013758;IPR013757;IPR013506;IPR013759;IPR018522;IPR031660;IPR006171;				PF13516;PF02758;					32, 38.9				triterpenoid biosynthetic process [GO:0016104], D topological change [GO:0006265]	, DOMAIN 449 563 Toprim. {ECO:0000259|PROSITE:PS50880}.
gene8714	Cluster1	1.47241	2.39261	2.19914	1.32789	1.84801	0.207872	331893	GO:0005351, GO:0008643, GO:0016020, GO:0005215, GO:0006810, GO:0016021, GO:0008733	sugar:hydrogen symporter activity, carbohydrate transport, membrane, transporter activity, transport, integral to membrane, L-arabinose isomerase activity	IPR003663, IPR005828, IPR007114, IPR005829, IPR016196	Sugar transporter, General substrate transporter, Major facilitator superfamily, Sugar transporter, conserved site, MFS general substrate transporter	SUGRTRNSPORT, Sugar_tr, SP: MFS transporter, sugar porter (SP) famil, MFS, SUGAR_TRANSPORT_1, MFS general substrate transporter	P39932	Sugar transporter STL1	STL1 YDR536W D9719.39	IPR003663, IPR005828, IPR005829, IPR020846	Sugar/inositol transporter, Major facilitator, sugar transporter-like, Sugar transporter, conserved site, Major facilitator superfamily domain	sce:YDR536W	L2FBT0	IPR003663, IPR005828, IPR005829, IPR020846	Sugar/inositol transporter, Major facilitator, sugar transporter-like, Sugar transporter, conserved site, Major facilitator superfamily domain	XP_007287139.1	XM_003662328.1	100	45.92	82.98	82.98	82
gene10500	Cluster1	1.89508	2.57373	2.29511	0.624616	1.84713	0.55637	353061	GO:0005215, GO:0006810, GO:0016021	transporter activity, transport, integral to membrane	IPR005828, IPR016196	General substrate transporter, MFS general substrate transporter	Sugar_tr, MFS general substrate transporter	Q9XIH6	Putative polyol transporter 2	PLT2 At2g16130 F7H1.15	IPR003663, IPR005828, IPR005829, IPR020846	Sugar/inositol transporter, Major facilitator, sugar transporter-like, Sugar transporter, conserved site, Major facilitator superfamily domain	ath:AT2G16130	F9FWI3	IPR003663, IPR005828, IPR005829, IPR020846	Sugar/inositol transporter, Major facilitator, sugar transporter-like, Sugar transporter, conserved site, Major facilitator superfamily domain	KGO73501.1	XM_007825876.2	83.33	39.13	95.56	62.5	89.47
gene9541	Cluster1	1.60815	0.999392	2.34508	2.43053	1.84579	0.341019	76193		unknown_gene		unknown_gene			unknown_gene			unknown_gene				unknown_gene			100
NOV_004556	Cluster1	1.70628	1.82071	2.25994	1.58397	1.84273	0.0650315							I6S3A9	Putative neurotoxin 7 (Putative neurotoxin 8)						PF00270;PF00271;PF00863;PF00851;PF01577;PF00767;PF08440;PF00680;					33.9
gene6743	Cluster1	1.34732	1.77487	1.74073	2.50744	1.84259	0.175569	339736						Q9USY4	ARS-binding protein 2	abp2 SPBC1861.02	IPR018562	ARS binding protein 2	spo:SPBC1861.02	E3QGJ1	IPR018562	ARS binding protein 2	EFQ29979.1	XM_002055846.2	100	48.04	77.88	77.88	96.88
gene6635	Cluster1	2.08193	2.18669	1.70973	1.39047	1.84221	0.0994376	330180												L7HN27	IPR021842	Protein of unknown function DUF3435	ELQ32345.1		98.41		37.39	37.39
gene3848	Cluster1	1.54327	2.14299	2.21498	1.4588	1.84001	0.116443	75846	GO:0003976	UDP-N-acetylglucosamine-lysosomal-enzyme N-acetylglucosaminephosphotransferase activity	IPR009050	Globin-like	Globin-like	E6RCE9	3-O-alpha-D-mannopyranosyl-alpha-D-mannopyranose xylosylphosphotransferase (EC 2.7.8.32) (Xylosylphosphotransferase 1)	XPT1 CGB_I4040W	IPR021520, IPR031356, IPR031357	Stealth protein CR2, conserved region 2, Stealth protein CR4, conserved region 4, Stealth protein CR3, conserved region 3	cgi:CGB_I4040W	W4KI56	IPR018247, IPR021520, IPR031357, IPR031358	EF-Hand 1, calcium-binding site, Stealth protein CR2, conserved region 2, Stealth protein CR3, conserved region 3, Stealth protein CR1, conserved region 1	XP_009541897.1		100	29.38	51.11	51.11
gene7738	Cluster1	1.66277	2.32334	1.79345	1.58046	1.84	0.0836388	356659	GO:0005215, GO:0006810, GO:0016020	transporter activity, transport, membrane	IPR005829	Sugar transporter, conserved site	SUGAR_TRANSPORT_2
gene4069	Cluster1	1.13145	2.63673	1.94493	1.63667	1.83744	0.297284	345273		unknown_gene		unknown_gene			unknown_gene			unknown_gene		M4FVU1		unknown_gene	XP_009222068.1		100		72.06	64.71
gene10656	Cluster1	1.71074	1.99097	2.19864	1.44664	1.83675	0.0807043	238994	GO:0008766, GO:0018169, GO:0043773, GO:0043774	UDP-N-acetylmuramoylalanyl-D-glutamyl-2,6-diaminopimelate-D-alanyl-D-alanine ligase activity, ribosomal S6-glutamic acid ligase activity, coenzyme F420-0 gamma-glutamyl ligase activity, coenzyme F420-2 alpha-glutamyl ligase activity	IPR000408, IPR009091	Regulator of chromosome condensation, RCC1, Regulator of chromosome condensation/beta-lactamase-inhibitor protein II	RCCNDNSATION, RCC1, RCC1_3, RCC1_2, RCC1/BLIP-II	P28745	Protein pim1 (Poly(A)+ R transport protein 2)	pim1 dcd1 ptr2 SPBC557.03c	IPR000408, IPR009091	Regulator of chromosome condensation, RCC1, Regulator of chromosome condensation 1/beta-lactamase-inhibitor protein II	spo:SPBC557.03c	S3C126	IPR000408, IPR009091	Regulator of chromosome condensation, RCC1, Regulator of chromosome condensation 1/beta-lactamase-inhibitor protein II	EPE07209.1		99.29	44.17	70.91	70.91
gene737	Cluster1	2.21164	1.65812	1.95028	1.51704	1.83427	0.0718834	354575		unknown_gene		unknown_gene			unknown_gene			unknown_gene				unknown_gene			100
gene10222	Cluster1	1.53642	0.872275	2.78009	2.14367	1.83311	0.501114	74618						Q9V022	Proline--tR ligase (EC 6.1.1.15) (Prolyl-tR synthetase) (ProRS)	proS PYRAB09760 PAB1724	IPR002314, IPR002316, IPR004154, IPR004499, IPR006195, IPR016061, IPR017449	Aminoacyl-tR synthetase, class II (G/ P/ S/T), Proline-tR ligase, class IIa, Anticodon-binding, Proline-tR ligase, class IIa, archaeal-type, Aminoacyl-tR synthetase, class II, Proline-tR ligase, class II, C-terminal, Prolyl-tR synthetase, class II	pab:PAB1724	S7MYI5	IPR003112, IPR031213	Olfactomedin-like domain, Myocilin	XP_005867711.1		100	46.51	38	38
gene76	Cluster1	1.11359	1.80249	0.783477	3.6288	1.83209	1.21122	245974	GO:0010181, GO:0016491, GO:0003959	FMN binding, oxidoreductase activity, DPH dehydrogenase activity	IPR001155	DH:flavin oxidoreductase/DH oxidase, N-terminal	Oxidored_FMN	Q5KXG9	DPH dehydrogenase (EC 1.6.99.1)	namA GK2332	IPR001155, IPR013785, IPR023663	DH:flavin oxidoreductase/DH oxidase, N-terminal, Aldolase-type TIM barrel, DPH dehydrogenase	gka:GK2332	A0A010RRZ9	IPR001155, IPR013785	DH:flavin oxidoreductase/DH oxidase, N-terminal, Aldolase-type TIM barrel	XP_007601320.1		100	31.49	61.59	61.59
gene8031	Cluster1	1.44175	1.96032	2.08032	1.82606	1.82711	0.0575899	261854	GO:0003676	nucleic acid binding	IPR003100, IPR003165, IPR014811, IPR012337	Argonaute and Dicer protein, PAZ, Stem cell self-renewal protein Piwi, Region of unknown function DUF1785, Polynucleotidyl transferase, Ribonuclease H fold	PAZ, Piwi, DUF1785, PIWI, Ribonuclease H-like	O74957	Protein argonaute (Cell cycle control protein ago1) (Eukaryotic translation initiation factor 2C 2-like protein ago1) (PAZ Piwi domain protein ago1) (Protein slicer) (R interference pathway protein ago1)	ago1 csp9 SPCC736.11	IPR003100, IPR003165, IPR012337, IPR014811, IPR032472, IPR032473, IPR032474	PAZ domain, Piwi domain, Ribonuclease H-like domain, Argonaute, linker 1 domain, Argonaute linker 2 domain, Protein argonaute, Mid domain, Protein argonaute, N-terminal	spo:SPCC736.11	D0U267	IPR003100, IPR003165, IPR012337, IPR014811, IPR032472, IPR032473, IPR032474	PAZ domain, Piwi domain, Ribonuclease H-like domain, Argonaute, linker 1 domain, Argonaute linker 2 domain, Protein argonaute, Mid domain, Protein argonaute, N-terminal	ACY36942.1		100	29.7	95.42	95.42
NOV_003208	Cluster1	2.2978	2.23139	1.104	1.67518	1.82709	0.232742							Q115B3, D8QNS2	tR N6-adenosine threonylcarbamoyltransferase (EC 2.3.1.234) (N6-L-threonylcarbamoyladenine synthase) (t(6)A synthase) (t(6)A37 threonylcarbamoyladenosine biosynthesis protein TsaD) (tR threonylcarbamoyladenosine biosynthesis protein TsaD), Putative uncharacterized protein	tsaD gcp Tery_1635, SELMODRAFT_403013	IPR000905;IPR017861;IPR022450;, IPR000953;IPR023780;IPR016197;									33.9, 44.7				tR threonylcarbamoyladenosine modification [GO:0002949],	, DOMAIN 12 60 Chromo. {ECO:0000259|PROSITE:PS50013}.
gene10501	Cluster1	1.75475	2.57463	2.24176	0.719135	1.82257	0.490873	357711	GO:0005351, GO:0008643, GO:0016020, GO:0005215, GO:0006810, GO:0016021, GO:0008733	sugar:hydrogen symporter activity, carbohydrate transport, membrane, transporter activity, transport, integral to membrane, L-arabinose isomerase activity	IPR003663, IPR005828, IPR007114, IPR005829, IPR016196	Sugar transporter, General substrate transporter, Major facilitator superfamily, Sugar transporter, conserved site, MFS general substrate transporter	SUGRTRNSPORT, Sugar_tr, MFS, SUGAR_TRANSPORT_2, MFS general substrate transporter	P46333	Probable metabolite transport protein CsbC	csbC yxcC BSU39810 SS92BR	IPR003663, IPR005828, IPR005829, IPR020846	Sugar/inositol transporter, Major facilitator, sugar transporter-like, Sugar transporter, conserved site, Major facilitator superfamily domain	bsu:BSU39810	W9XZ21	IPR003663, IPR005828, IPR005829, IPR020846	Sugar/inositol transporter, Major facilitator, sugar transporter-like, Sugar transporter, conserved site, Major facilitator superfamily domain	XP_007724901.1	XM_007915862.1	98.45	41.43	92.45	92.45	83.7
gene8332	Cluster1	1.64269	1.84395	0.860141	2.93923	1.8215	0.551503	74256	GO:0003700, GO:0005634, GO:0006355, GO:0008270	transcription factor activity, nucleus, regulation of transcription, D-dependent, zinc ion binding	IPR001138	Fungal transcriptional regulatory protein, N-terminal	Zn_clus, no description, ZN2_CY6_FUNGAL_2, ZN2_CY6_FUNGAL_1, Zn2/Cys6 D-binding domain	Q05958	Sterol regulatory element-binding protein ECM22 (Extracellular mutant protein 22)	ECM22 YLR228C	IPR001138, IPR021858	Zn(2)-C6 fungal-type D-binding domain, Protein of unknown function DUF3468	sce:YLR228C	W9YFH7			XP_007735642.1		100	71.43	46.67	46.67
NOV_000613	Cluster1	2.40218	1.85136	1.01563	2.0102	1.81984	0.255776							Q8GX69	Beta-galactosidase 16 (Lactase 16) (EC 3.2.1.23)	BGAL16 At1g77410 F2P24.12 T5M16.1	IPR008979;IPR031330;IPR019801;IPR013781;IPR001944;IPR017853;IPR000922;				unknown_gene					37.7				carbohydrate metabolic process [GO:0005975]	DOMAIN 729 815 SUEL-type lectin. {ECO:0000255|PROSITE-ProRule:PRU00260}.
NOV_002799	Cluster1	1.93665	1.6431	2.00107	1.69814	1.81974	0.0231341							Q9HLX5, T1L7Y8	Histidine--tR ligase (EC 6.1.1.21) (Histidyl-tR synthetase) (HisRS), Uncharacterized protein	hisS Ta0099,	IPR006195;IPR004154;IPR015807;IPR004516;IPR033656;, IPR025661;IPR025660;IPR013128;IPR000668;				unknown_gene					33.5, 40.4				histidyl-tR aminoacylation [GO:0006427],	, DOMAIN 1 165 Pept_C1. {ECO:0000259|SMART:SM00645}.
gene8961	Cluster1	1.95525	1.30366	1.98399	2.02954	1.81811	0.0889212	75076	GO:0004553, GO:0005975	hydrolase activity, hydrolyzing O-glycosyl compounds, carbohydrate metabolic process	IPR001722, IPR008985	Glycoside hydrolase, family 7, Concanavalin A-like lectin/glucanase	GUX1_CRYPA_Q00548;, GLHYDRLASE7, Glyco_hydro_7, Concanavalin A-like lectins/glucanases	A1DNL0	Probable 1,4-beta-D-glucan cellobiohydrolase B (EC 3.2.1.91) (Beta-glucancellobiohydrolase B) (Exocellobiohydrolase B) (Exoglucanase B)	cbhB NFIA_057300	IPR000254, IPR001722, IPR013320	Cellulose-binding domain, fungal, Glycoside hydrolase, family 7, Concanavalin A-like lectin/glucanase domain	nfi:NFIA_057300	H6TBN1	IPR001722, IPR013320	Glycoside hydrolase, family 7, Concanavalin A-like lectin/glucanase domain	ADZ44605.1	XM_009223517.1	100	84.62	84.31	84.31	75.47
gene2653	Cluster1	1.83833	2.05649	1.8577	1.51369	1.81655	0.0378661	75522						P29615	Lysozyme P (EC 3.2.1.17) (1,4-beta-N-acetylmuramidase P)	LysP CG9116	IPR000974, IPR001916, IPR019799, IPR023346	Glycoside hydrolase, family 22, lysozyme, Glycoside hydrolase, family 22, Glycoside hydrolase, family 22, conserved site, Lysozyme-like domain	dme:Dmel_CG9116						100	35.9
gene4099	Cluster1	1.61286	1.77624	1.54357	2.33131	1.816	0.0956526	328203						P44794	tR-dihydrouridine(20/20a) synthase (EC 1.3.1.-) (EC 1.3.1.91) (U20-specific dihydrouridine synthase) (U20-specific Dus) (tR-dihydrouridine synthase A)	dusA HI_0634	IPR001269, IPR004653, IPR013785, IPR018517	tR-dihydrouridine synthase, tR-dihydrouridine(20/20a) synthase, Aldolase-type TIM barrel, tR-dihydrouridine synthase, conserved site	hin:HI0634	B8NVP5	IPR001138, IPR007219	Zn(2)-C6 fungal-type D-binding domain, Transcription factor domain, fungi	XP_002384439.1		100	37.84	34.32	34.32
gene1033	Cluster1	1.11882	2.18628	1.27582	2.67986	1.8152	0.4153	286329	GO:0003824, GO:0005488, GO:0008152, GO:0003960	catalytic activity, binding, metabolic process, DPH:quinone reductase activity	IPR013154, IPR011032, IPR016040	Alcohol dehydrogenase GroES-like, GroES-like, D(P)-binding	ADH_N, GroES-like, D(P)-binding Rossmann-fold domains	Q0MVN8	Quinone oxidoreductase (EC 1.6.5.5) (DPH:quinone reductase) (Zeta-crystallin)	CRYZ	IPR002085, IPR002364, IPR011032, IPR013149, IPR013154, IPR016040	Alcohol dehydrogenase superfamily, zinc-type, Quinone oxidoreductase/zeta-crystallin, conserved site, GroES-like, Alcohol dehydrogenase, C-terminal, Alcohol dehydrogenase, N-terminal, D(P)-binding domain		M7SDA3	IPR002085, IPR011032, IPR013154, IPR016040	Alcohol dehydrogenase superfamily, zinc-type, GroES-like, Alcohol dehydrogenase, N-terminal, D(P)-binding domain	XP_007798758.1		100	46.84	74.67	74.67
gene6116	Cluster1	1.67241	1.92081	1.54605	2.11021	1.81237	0.0477465	37646	GO:0006470, GO:0008138, GO:0016311, GO:0016791, GO:0004725, GO:0004727	protein amino acid dephosphorylation, protein tyrosine/serine/threonine phosphatase activity, dephosphorylation, phosphoric monoester hydrolase activity, protein tyrosine phosphatase activity, prenylated protein tyrosine phosphatase activity	IPR000340, IPR000387	Protein-tyrosine phosphatase, dual specificity, Protein-tyrosine phosphatase	DSPc, no description, TYR_PHOSPHATASE_DUAL, TYR_PHOSPHATASE_2	O13632	Tyrosine-protein phosphatase yvh1 (PTPase yvh1) (EC 3.1.3.48)	yvh1 pi040 SPBC17A3.06	IPR000340, IPR000387, IPR016278, IPR020422, IPR024950, IPR029021	Dual specificity phosphatase, catalytic domain, Tyrosine specific protein phosphatases domain, Dual specificity protein phosphatase 12, Dual specificity protein phosphatase domain, Dual specificity phosphatase, Protein-tyrosine phosphatase-like	spo:SPBC17A3.06	R8B8P1	IPR000387, IPR024950, IPR029021	Tyrosine specific protein phosphatases domain, Dual specificity phosphatase, Protein-tyrosine phosphatase-like	XP_007919531.1		93.99	32.01	60.66	60.66
gene6773	Cluster1	1.8252	2.17598	1.95205	1.28458	1.80945	0.107604	339769	GO:0003824, GO:0044237, GO:0050662, GO:0005488, GO:0008152, GO:0045551	catalytic activity, cellular metabolic process, coenzyme binding, binding, metabolic process, cinnamyl-alcohol dehydrogenase activity	IPR001509, IPR016040	D-dependent epimerase/dehydratase, D(P)-binding	Epimerase, D(P)-binding Rossmann-fold domains	Q9UT59	Putative uncharacterized oxidoreductase C513.07 (EC 1.1.1.-)	SPAC513.07	IPR001509, IPR016040	D-dependent epimerase/dehydratase, N-terminal domain, D(P)-binding domain	spo:SPAC513.07	G3XMB9	IPR001509, IPR016040	D-dependent epimerase/dehydratase, N-terminal domain, D(P)-binding domain	XP_001393496.2		98.97	37.8	58.93	58.33
gene6070	Cluster1	2.24946	2.00306	1.92925	1.04228	1.80601	0.208484	339771	GO:0008152, GO:0016491, GO:0018658	metabolic process, oxidoreductase activity, salicylate 1-monooxygenase activity	IPR003042, IPR006076	Aromatic-ring hydroxylase, FAD dependent oxidoreductase	RNGMNOXGSE, DAO	Q53552	Salicylate hydroxylase (EC 1.14.13.1) (Salicylate 1-monooxygenase)	nahG	IPR002938, IPR017631, IPR023753	FAD-binding domain, Salicylate 1-monooxygenase, FAD/D(P)-binding domain		R1GMX8	IPR002938, IPR023753	FAD-binding domain, FAD/D(P)-binding domain	XP_007579492.1		95.6	36.23	55.15	55.15
gene8752	Cluster1	2.03437	1.65714	1.77828	1.73657	1.80159	0.0199556	49001	GO:0004553, GO:0005975	hydrolase activity, hydrolyzing O-glycosyl compounds, carbohydrate metabolic process	IPR001223, IPR001579, IPR017853	Glycoside hydrolase, family 18, catalytic domain, Glycoside hydrolase, chitinase active site, Glycoside hydrolase, catalytic core	Glyco_hydro_18, CHITISE_18, (Trans)glycosidases	E9ENC6	Endochitinase 3 (EC 3.2.1.14) (Chitinase 3)	chi3 MAA_01212	IPR001223, IPR001579, IPR013781, IPR017853	Glycoside hydrolase family 18, catalytic domain, Glycoside hydrolase, chitinase active site, Glycoside hydrolase, catalytic domain, Glycoside hydrolase superfamily	maj:MAA_01212	A0A086NT07	IPR001223, IPR001579, IPR013781, IPR017853	Glycoside hydrolase family 18, catalytic domain, Glycoside hydrolase, chitinase active site, Glycoside hydrolase, catalytic domain, Glycoside hydrolase superfamily	KFG84275.1		89.31	29.31	29.6	29.6
gene8186	Cluster1	1.83023	2.14344	1.58657	1.64042	1.80016	0.0474715	74006		unknown_gene		unknown_gene			unknown_gene			unknown_gene		C7YX41		unknown_gene	XP_003049232.1		84.81		39.13	39.13
gene7308	Cluster1	1.42276	1.43124	1.42299	2.92316	1.80004	0.420478	259082	GO:0016491, GO:0050660, GO:0003824	oxidoreductase activity, FAD binding, catalytic activity	IPR006094, IPR016166	FAD linked oxidase, N-terminal, FAD-binding, type 2	FAD_binding_4, FAD-binding domain	Q796P5	Uncharacterized FAD-linked oxidoreductase YitY (EC 1.-.-.-)	yitY BSU11170	IPR006094, IPR007173, IPR016164, IPR016166, IPR016167, IPR016169	FAD linked oxidase, N-terminal, D-arabinono-1,4-lactone oxidase, FAD-linked oxidase-like, C-terminal, FAD-binding, type 2, FAD-binding, type 2, subdomain 1, CO dehydrogenase flavoprotein-like, FAD-binding, subdomain 2	bsu:BSU11170	B2ADS4	IPR016166, IPR016167, IPR016169	FAD-binding, type 2, FAD-binding, type 2, subdomain 1, CO dehydrogenase flavoprotein-like, FAD-binding, subdomain 2	XP_001903813.1		99.21	30.11	68.24	68.24
NOV_003880	Cluster1	2.33178	2.18451	1.19934	1.48311	1.79968	0.222962							Q6CZX2, G4N5W0	50S ribosomal protein L23, Uncharacterized protein	rplW ECA4029, MGG_17035	IPR012677;IPR012678;IPR001014;IPR013025;,				unknown_gene					32.3, 118				translation [GO:0006412],	,
gene6666	Cluster1	1.34009	1.83247	0.575519	3.4469	1.79875	1.10605	36707	GO:0008152, GO:0016491, GO:0003824, GO:0005488	metabolic process, oxidoreductase activity, catalytic activity, binding	IPR002198, IPR016040	Short-chain dehydrogenase/reductase SDR, D(P)-binding	adh_short, D(P)-binding Rossmann-fold domains	P07772	1,6-dihydroxycyclohexa-2,4-diene-1-carboxylate dehydrogenase (EC 1.3.1.25) (2-hydro-1,2-dihydroxybenzoate dehydrogenase) (DHB dehydrogenase) (Cis-1,2-dihydroxy-3,4-cyclohexadiene-1-carboxylate dehydrogenase) (Cis-1,2-dihydroxycyclohexa-3,5-diene-1-carboxylate dehydrogenase)	benD ACIAD1439	IPR002198, IPR002347, IPR016040, IPR020904	Short-chain dehydrogenase/reductase SDR, Glucose/ribitol dehydrogenase, D(P)-binding domain, Short-chain dehydrogenase/reductase, conserved site	aci:ACIAD1439	R8BWG6	IPR002198, IPR002347, IPR016040	Short-chain dehydrogenase/reductase SDR, Glucose/ribitol dehydrogenase, D(P)-binding domain	XP_007911700.1		100	30.68	79.31	79.31
gene9721	Cluster1	0.692047	2.75889	3.49771	0.243579	1.79806	1.86292	222359	GO:0006801, GO:0046872	superoxide metabolic process, metal ion binding	IPR001424	Superoxide dismutase, copper/zinc binding	Cu,Zn superoxide dismutase-like	Q5ACV9	Cell surface superoxide dismutase [Cu-Zn] 6 (EC 1.15.1.1) (Predicted GPI-anchored protein 9)	SOD6 PGA9 SOD33 CaO19.2108 CaO19.9656	IPR001424, IPR024134	Superoxide dismutase, copper/zinc binding domain, Superoxide dismutase (Cu/Zn) / superoxide dismutase copper chaperone	cal:CaO19.9656, cal:CaO19.2108	R8BF37	IPR001424, IPR024134	Superoxide dismutase, copper/zinc binding domain, Superoxide dismutase (Cu/Zn) / superoxide dismutase copper chaperone	XP_007917312.1	XM_009651041.1	82.59	32.07	58.71	58.71	82.67
gene11572	Cluster1	1.7117	1.67625	1.37457	2.42881	1.79783	0.149873	334735						Q5V1I8	Glutamyl-tR reductase (GluTR) (EC 1.2.1.70)	hemA rrnAC1708	IPR000343, IPR006151, IPR015895, IPR015896, IPR016040, IPR018214	Tetrapyrrole biosynthesis, glutamyl-tR reductase, Quinate/shikimate 5-dehydrogenase/glutamyl-tR reductase, Tetrapyrrole biosynthesis, glutamyl-tR reductase, N-terminal, Tetrapyrrole biosynthesis, glutamyl-tR reductase, dimerisation domain, D(P)-binding domain, Glutamyl-tR reductase, conserved site	hma:rrnAC1708	I1S0E9	IPR000571	Zinc finger, CCCH-type	ESU16852.1		100	33.33	77.59	77.59
gene8733	Cluster1	1.60576	1.63652	1.8876	2.05502	1.79623	0.0342771	357075						Q9LZX1	Protein LURP-one-related 15	At5g01750 T20L15.20	IPR007612, IPR025659	LURP1-related protein domain, Tubby C-terminal-like domain	ath:AT5G01750	A1DBI1	IPR007612, IPR025659	LURP1-related protein domain, Tubby C-terminal-like domain	XP_001262118.1		77.69	22.39	35.69	35.69
gene1954	Cluster1	1.63292	1.70279	1.83667	2.0105	1.79572	0.0207365	320691		unknown_gene		unknown_gene			unknown_gene			unknown_gene		A0A066XR47		unknown_gene	KDN68206.1		100		51.47	51.47
gene8666	Cluster1	1.76682	2.35323	2.21464	0.839941	1.79366	0.350161	340888	GO:0004497, GO:0005506, GO:0006118, GO:0020037, GO:0050381	monooxygenase activity, iron ion binding, electron transport, heme binding, unspecific monooxygenase activity	IPR002403, IPR001128	Cytochrome P450, E-class, group IV, Cytochrome P450	EP450IV, p450, CYTOCHROME_P450, Cytochrome P450	Q12612	Trichodiene oxygenase (EC 1.14.-.-) (Cytochrome P450 58)	TRI4 CYP58 TOX4	IPR001128, IPR002401, IPR017972	Cytochrome P450, Cytochrome P450, E-class, group I, Cytochrome P450, conserved site		S3E0W5	IPR001128, IPR002403	Cytochrome P450, Cytochrome P450, E-class, group IV	XP_008080175.1		100	44.26	67.16	67.16
gene4120	Cluster1	2.14226	1.33782	1.69272	2.00095	1.79344	0.0956166	69299		unknown_gene		unknown_gene			unknown_gene			unknown_gene		T0M4S7		unknown_gene	EQB58536.1		99.5		30.97	30.97
gene6489	Cluster1	1.7039	2.03556	1.95504	1.47683	1.79283	0.0482486	106086	GO:0003677, GO:0006355	D binding, regulation of transcription, D-dependent	IPR000910, IPR009071	High mobility group box, HMG1/HMG2, High mobility group box, HMG	HMG_box, no description, HMG_BOX_2, HMG-box	P0CY17	Mating-type M-specific polypeptide Mc (mat-Mc)	mat1-Mc matMc SPBC23G7.09	IPR009071	High mobility group box domain	spo:SPBC23G7.09, spo:SPBC1711.02	R8BAE2			XP_007918939.1	XM_003719857.1	100	33.33	47.11	47.11	82.61
gene1204	Cluster1	1.42724	1.25547	2.7892	1.68829	1.79005	0.356519	335557	GO:0005215, GO:0006857, GO:0016020	transporter activity, oligopeptide transport, membrane	IPR000109, IPR016196	TGF-beta receptor, type I/II extracellular region, MFS general substrate transporter	PTR2, PTR2_2, MFS general substrate transporter	P32901	Peptide transporter PTR2 (Peptide permease PTR2)	PTR2 YKR093W YKR413	IPR000109, IPR018456, IPR020846	Proton-dependent oligopeptide transporter family, PTR2 family proton/oligopeptide symporter, conserved site, Major facilitator superfamily domain	sce:YKR093W	R8BV10	IPR000109, IPR018456, IPR020846	Proton-dependent oligopeptide transporter family, PTR2 family proton/oligopeptide symporter, conserved site, Major facilitator superfamily domain	XP_007912064.1	XM_003708677.1	99.09	40.93	76.06	76.06	82.81
gene2358	Cluster1	0.709733	2.18818	2.18136	2.07834	1.7894	0.390456	76080		unknown_gene		unknown_gene			unknown_gene			unknown_gene				unknown_gene
gene1992	Cluster1	1.53963	2.31688	1.99834	1.2973	1.78804	0.156606	354805			IPR000782	Beta-Ig-H3/fasciclin	Fasciclin, no description, FAS1, FAS1 domain	Q941V3	Probable metal-nicotianamine transporter YSL18 (Protein YELLOW STRIPE LIKE 18) (OsYSL18)	YSL18 Os01g0829900 LOC_Os01g61390 B1088C09.39 P0446G04.12	IPR004813	Oligopeptide transporter, OPT superfamily	osa:4327424	R8BJQ0	IPR000782	FAS1 domain	XP_007915734.1		100	38.37	60.18	60.18
gene3381	Cluster1	1.45185	2.08083	2.43445	1.14188	1.77725	0.258411	336913	GO:0004672, GO:0005524, GO:0006468, GO:0004674	protein kinase activity, ATP binding, protein amino acid phosphorylation, protein serine/threonine kinase activity	IPR000719, IPR002290, IPR011009	Protein kinase, core, Serine/threonine protein kinase, Protein kinase-like	WR19_ARATH_Q9SZ67;, no description, Protein kinase-like (PK-like)	Q6Z829	Wee1-like protein kinase (EC 2.7.10.2)	WEE1 Os02g0135300 LOC_Os02g04240 P0585B01.27	IPR000719, IPR008271, IPR011009, IPR017441	Protein kinase domain, Serine/threonine-protein kinase, active site, Protein kinase-like domain, Protein kinase, ATP binding site	osa:4328224	G9N0X4	IPR000719, IPR011009	Protein kinase domain, Protein kinase-like domain	EHK19407.1		78.71	25	38.24	38.24
NOV_002419	Cluster1	2.00537	1.66412	1.91422	1.51333	1.77426	0.038304							P36891	Replication initiator protein	repSA					PF12260;PF14875;					35				D replication [GO:0006260]
gene11510	Cluster1	0.933645	2.38942	0.923923	2.83498	1.77049	0.733299	267273	GO:0008152, GO:0016491, GO:0003824, GO:0005488, GO:0004303	metabolic process, oxidoreductase activity, catalytic activity, binding, estradiol 17-beta-dehydrogenase activity	IPR002198, IPR002347, IPR016040	Short-chain dehydrogenase/reductase SDR, Glucose/ribitol dehydrogenase, D(P)-binding	SDRFAMILY, GDHRDH, adh_short, D(P)-binding Rossmann-fold domains	O16881	3 beta-hydroxysteroid dehydrogenase dhs-16 (EC 1.1.1.-)	dhs-16 C10F3.2	IPR002198, IPR002347, IPR016040, IPR020904	Short-chain dehydrogenase/reductase SDR, Glucose/ribitol dehydrogenase, D(P)-binding domain, Short-chain dehydrogenase/reductase, conserved site	cel:CELE_C10F3.2	F9WWA9	IPR002198, IPR002347, IPR016040	Short-chain dehydrogenase/reductase SDR, Glucose/ribitol dehydrogenase, D(P)-binding domain	XP_003856083.1	XM_001266376.1	100	32.79	59.04	59.04	100
gene6677	Cluster1	2.34925	1.096	2.20507	1.43041	1.77018	0.273604	356334	GO:0003824, GO:0005488, GO:0008152, GO:0032440	catalytic activity, binding, metabolic process, 2-alkenal reductase activity	IPR013149, IPR011032, IPR016040	Alcohol dehydrogenase, zinc-binding, GroES-like, D(P)-binding	ADH_zinc_N, GroES-like, D(P)-binding Rossmann-fold domains	Q9C0Y6	Zinc-type alcohol dehydrogenase-like protein PB24D3.08c (EC 1.-.-.-)	SPAPB24D3.08c	IPR002085, IPR011032, IPR013149, IPR016040	Alcohol dehydrogenase superfamily, zinc-type, GroES-like, Alcohol dehydrogenase, C-terminal, D(P)-binding domain	spo:SPAPB24D3.08c	G9NFQ3	IPR002085, IPR011032, IPR013149, IPR016040	Alcohol dehydrogenase superfamily, zinc-type, GroES-like, Alcohol dehydrogenase, C-terminal, D(P)-binding domain	EHK50767.1	XM_007841787.1	100	51.89	71.43	71.43	82.74
gene6073	Cluster1	2.43267	2.25533	1.77875	0.611765	1.76963	0.504063	37614	GO:0003700, GO:0005634, GO:0006355, GO:0008270, GO:0003677, GO:0006350	transcription factor activity, nucleus, regulation of transcription, D-dependent, zinc ion binding, D binding, transcription	IPR001138, IPR007219	Fungal transcriptional regulatory protein, N-terminal, Fungal specific transcription factor	FUNGALZNCYS, Zn_clus, Fungal_trans, no description, ZN2_CY6_FUNGAL_2, ZN2_CY6_FUNGAL_1, Zn2/Cys6 D-binding domain	P39113	Regulatory protein CAT8	CAT8 MSP8 YMR280C YM8021.06C	IPR001138, IPR007219	Zn(2)-C6 fungal-type D-binding domain, Transcription factor domain, fungi	sce:YMR280C	A1C5P4	IPR001138, IPR007219	Zn(2)-C6 fungal-type D-binding domain, Transcription factor domain, fungi	XP_001276438.1		100	32.61	88.89	88.89
NOV_003243	Cluster1	2.60647	2.13487	1.48937	0.847635	1.76959	0.440582							G4N5W0	Uncharacterized protein	MGG_17035					PF03129;,					109
gene10430	Cluster1	1.54961	1.80664	2.01637	1.6913	1.76598	0.0291854	265200	GO:0004497, GO:0005506, GO:0006118, GO:0020037	monooxygenase activity, iron ion binding, electron transport, heme binding	IPR001128, IPR002401	Cytochrome P450, Cytochrome P450, E-class, group I	P450, EP450I, p450, CYTOCHROME_P450, Cytochrome P450	O70537	Cytochrome P450 3A31 (EC 1.14.14.1) (CYPIIIA31) (Cytochrome P450 SH3A-1)	CYP3A31	IPR001128, IPR002402, IPR008072, IPR017972	Cytochrome P450, Cytochrome P450, E-class, group II, Cytochrome P450, E-class, CYP3A, Cytochrome P450, conserved site		L2FFA4	IPR001128, IPR002401, IPR017972	Cytochrome P450, Cytochrome P450, E-class, group I, Cytochrome P450, conserved site	XP_007286212.1		100	36.84	54.55	54.55
gene10815	Cluster1	0.461029	2.92317	1.0507	2.62714	1.76551	1.0738	266750	GO:0008152, GO:0016491, GO:0018658	metabolic process, oxidoreductase activity, salicylate 1-monooxygenase activity	IPR003042, IPR006076	Aromatic-ring hydroxylase, FAD dependent oxidoreductase	RNGMNOXGSE, DAO	Q9F131	3-hydroxybenzoate 6-hydroxylase 1 (EC 1.14.13.24) (Constitutive 3-hydroxybenzoate 6-hydroxylase)	xlnD	IPR002938, IPR023753	FAD-binding domain, FAD/D(P)-binding domain		M7TFS4	IPR002938, IPR023753	FAD-binding domain, FAD/D(P)-binding domain	XP_007792107.1		100	25.31	58	58
gene5453	Cluster1	1.52769	1.72817	1.5453	2.25942	1.76514	0.0875983	338832			IPR002877	Ribosomal R methyltransferase RrmJ/FtsJ	FtsJ	Q9CPY0	rR methyltransferase 2, mitochondrial (EC 2.1.1.-) (16S rR (uridine(1369)-2'-O)-methyltransferase) (16S rR [Um1369] 2'-O-methyltransferase) (Protein ftsJ homolog 2)	Ftsj2 Mrm2	IPR002877, IPR015507, IPR029063	Ribosomal R methyltransferase FtsJ domain, Ribosomal R large subunit methyltransferase E, S-adenosyl-L-methionine-dependent methyltransferase	mmu:68017	T5ABI3	IPR002877, IPR029063	Ribosomal R methyltransferase FtsJ domain, S-adenosyl-L-methionine-dependent methyltransferase	EQL02815.1		100	25.52	53.23	53.23
gene6807	Cluster1	1.24322	1.88068	1.67526	2.26026	1.76485	0.134745	291163	GO:0004497, GO:0005506, GO:0006118, GO:0020037, GO:0050381	monooxygenase activity, iron ion binding, electron transport, heme binding, unspecific monooxygenase activity	IPR001128, IPR002401	Cytochrome P450, Cytochrome P450, E-class, group I	P450, EP450I, p450, CYTOCHROME_P450, Cytochrome P450	Q12609	Probable sterigmatocystin biosynthesis P450 monooxygenase stcF (EC 1.14.-.-) (Cytochrome P450 60A2)	stcF cyp60A2 AN7818	IPR001128, IPR002401, IPR017972	Cytochrome P450, Cytochrome P450, E-class, group I, Cytochrome P450, conserved site	ani:AN7818.2	N4V1L5	IPR001128, IPR002401, IPR017972	Cytochrome P450, Cytochrome P450, E-class, group I, Cytochrome P450, conserved site	ENH81299.1		100	44.44	55.94	55.94
gene7678	Cluster1	0.938705	1.44896	1.99869	2.67282	1.76479	0.41535	70826	GO:0005515, GO:0008270	protein binding, zinc ion binding	IPR001965, IPR011009, IPR011011	Zinc finger, PHD-type, Protein kinase-like, Zinc finger, FYVE/PHD-type	PHD, no description, ZF_PHD_2, ZF_PHD_1, Protein kinase-like (PK-like), FYVE/PHD zinc finger	P50947	Transcriptional regulatory protein PHO23	PHO23 YNL097C N2205	IPR001965, IPR011011, IPR013083, IPR019786, IPR019787, IPR024610, IPR028651	Zinc finger, PHD-type, Zinc finger, FYVE/PHD-type, Zinc finger, RING/FYVE/PHD-type, Zinc finger, PHD-type, conserved site, Zinc finger, PHD-finger, Inhibitor of growth protein, N-terminal histone-binding, ING family	sce:YNL097C	M2MKF8	IPR000719, IPR001965, IPR011009, IPR011011, IPR013083, IPR019786, IPR019787, IPR028651	Protein kinase domain, Zinc finger, PHD-type, Protein kinase-like domain, Zinc finger, FYVE/PHD-type, Zinc finger, RING/FYVE/PHD-type, Zinc finger, PHD-type, conserved site, Zinc finger, PHD-finger, ING family	XP_007681234.1		100	54.17	43.45	43.45
gene204	Cluster1	1.68361	2.01662	1.61375	1.74211	1.76402	0.0233337	320063						P21824	Chemotaxis protein methyltransferase (EC 2.1.1.80)	cheR EAE_15545	IPR000780, IPR022641, IPR022642, IPR026024, IPR029063	MCP methyltransferase, CheR-type, Chemotaxis receptor methyltransferase CheR, N-terminal, MCP methyltransferase, CheR-type, SAM-binding domain, C-terminal, Chemotaxis protein methyltransferase CheR, S-adenosyl-L-methionine-dependent methyltransferase	eae:EAE_15545	J3NGD9			XP_009216338.1		100	24.21	29.25	29.25
NOV_001033	Cluster1	1.67263	2.44285	1.22782	1.70332	1.76165	0.190083							C3LWP9	Putative phosphoenolpyruvate synthase regulatory protein (PEP synthase regulatory protein) (PSRP) (EC 2.7.11.33) (EC 2.7.4.28) (Pyruvate, water dikinase regulatory protein)	VCM66_A0945	IPR005177;IPR026530;				PF00294;					33.1				protein dephosphorylation [GO:0006470]
gene5255	Cluster1	2.30897	1.6588	1.73062	1.33314	1.75788	0.123664	39085	GO:0004871, GO:0007165	signal transducer activity, signal transduction	IPR013655, IPR000014	PAS fold-3, PAS	PAS_3, no description, PAS	Q8QGQ7	Aryl hydrocarbon receptor nuclear translocator-like protein 2 (Brain and muscle ARNT-like 2) (cBMAL2)	ARNTL2 BMAL2	IPR000014, IPR001067, IPR001610, IPR011598, IPR013767	PAS domain, Nuclear translocator, PAC motif, Myc-type, basic helix-loop-helix (bHLH) domain, PAS fold	gga:373925	E3Q9N6	IPR000014, IPR013655	PAS domain, PAS fold-3	EFQ27574.1	XM_006241850.2	92.08	47.37	56.98	56.98	100
gene2388	Cluster1	1.38237	1.99471	0.198924	3.45435	1.75759	1.37636	283607	GO:0004364	glutathione transferase activity	IPR004045, IPR010987, IPR012336	Glutathione S-transferase, N-terminal, Glutathione S-transferase, C-terminal-like, Thioredoxin-like fold	GST_N, Glutathione S-transferase (GST), C-terminal domain, Thioredoxin-like	P30347	Protein LigF	ligF	IPR004045, IPR004046, IPR010987, IPR012336	Glutathione S-transferase, N-terminal, Glutathione S-transferase, C-terminal, Glutathione S-transferase, C-terminal-like, Thioredoxin-like fold		R8B8X9	IPR004045, IPR010987, IPR012336	Glutathione S-transferase, N-terminal, Glutathione S-transferase, C-terminal-like, Thioredoxin-like fold	XP_007919430.1		100	35.21	57.6	57.6
NOV_001078	Cluster1	2.07151	0.449972	2.76288	1.74554	1.75748	0.704792							A0A089N417	Tagatose-6-phosphate kinase (EC 2.7.1.144)	PSTEL_10460	IPR002173;IPR011611;IPR029056;IPR017583;				PF02272;PF01411;PF07973;, PF00176;PF10452;					41.6				D-tagatose 6-phosphate catabolic process [GO:2001059]; lactose metabolic process [GO:0005988]	DOMAIN 23 288 PfkB. {ECO:0000259|Pfam:PF00294}.
NOV_013416	Cluster1	2.4661	2.49363	0.828254	1.21933	1.75183	0.549251							P53932	Uncharacterized transporter YNL095C	YNL095C N2215	IPR004776;				PF00119;, PF07690;					33.9				transmembrane transport [GO:0055085]
gene3985	Cluster1	2.81877	1.19512	2.15061	0.838779	1.75082	0.610242	355390						P33527	Multidrug resistance-associated protein 1 (ATP-binding cassette sub-family C member 1) (Leukotriene C(4) transporter) (LTC4 transporter)	ABCC1 MRP MRP1	IPR003439, IPR003593, IPR005292, IPR011527, IPR017871, IPR027417, IPR030241	ABC transporter-like, AAA+ ATPase domain, Multi drug resistance-associated protein, ABC transporter type 1, transmembrane domain, ABC transporter, conserved site, P-loop containing nucleoside triphosphate hydrolase, Multidrug resistance-associated protein 1	hsa:4363	R8BRB5			XP_007913379.1		100	48.94	64.71	64.71
gene2846	Cluster1	1.30148	1.20199	2.06919	2.42635	1.74975	0.265206	62735	GO:0005215, GO:0006810, GO:0016020	transporter activity, transport, membrane	IPR006043	Xanthine/uracil/vitamin C permease	Xan_ur_permease	O94300	Putative xanthine/uracil permease C887.17	SPBC887.17	IPR006043, IPR029940	Xanthine/uracil/vitamin C permease, AzgA purine transporter	spo:SPBC887.17	R8B8Y1	IPR006043, IPR029940	Xanthine/uracil/vitamin C permease, AzgA purine transporter	XP_007919458.1	XM_003666289.1	89.17	53	71	71	77.01
gene1133	Cluster1	1.76475	1.57429	1.58668	2.05508	1.7452	0.0376862	270537	GO:0006520, GO:0016491, GO:0003824, GO:0005488, GO:0008152, GO:0004352	amino acid metabolic process, oxidoreductase activity, catalytic activity, binding, metabolic process, glutamate dehydrogenase activity	IPR006096, IPR016210, IPR006095, IPR016040	Glutamate/phenylalanine/leucine/valine dehydrogenase, C-terminal, Glutamate dehydrogenase, D-dependent, Glutamate/phenylalanine/leucine/valine dehydrogenase, D(P)-binding	ELFV_dehydrog, D-dependent glutamate dehydrogenase, GLFV_DEHYDROGESE, D(P)-binding Rossmann-fold domains	P00365	D-specific glutamate dehydrogenase (D-GDH) (EC 1.4.1.2)	gdh-1 NCU00461	IPR006095, IPR006096, IPR016040, IPR016210	Glutamate/phenylalanine/leucine/valine dehydrogenase, Glutamate/phenylalanine/leucine/valine dehydrogenase, C-terminal, D(P)-binding domain, D-dependent glutamate dehydrogenase, eukaryotes	ncr:NCU00461	R8BMU3	IPR006095, IPR006096, IPR016040, IPR016210	Glutamate/phenylalanine/leucine/valine dehydrogenase, Glutamate/phenylalanine/leucine/valine dehydrogenase, C-terminal, D(P)-binding domain, D-dependent glutamate dehydrogenase, eukaryotes	XP_007914639.1	XM_007916448.1	100	81.29	85.1	85.1	79.78
gene10835	Cluster1	1.6728	1.43281	0.913706	2.949	1.74208	0.560824	295791	GO:0006865, GO:0015171, GO:0016020, GO:0006810	amino acid transport, amino acid transmembrane transporter activity, membrane, transport	IPR004841, IPR002293	Amino acid permease-associated region, Amino acid/polyamine transporter I	AA_permease, Amino acid transporter	Q9ZU50	Amino-acid permease BAT1 (Bidirectional amino acid transporter 1) (GABA permease) (AtGABP)	BAT1 GABP At2g01170 F10A8.5	IPR002293, IPR004756	Amino acid/polyamine transporter I, Amino acid permease subfamily	ath:AT2G01170	J3PI86	IPR002293	Amino acid/polyamine transporter I	XP_009229383.1		100	47.09	73.95	73.95
NOV_002402	Cluster1	0.149092	1.88809	2.07531	2.85383	1.74158	0.976491							Q12136, G3Q7B8	Something about silencing protein 10 (U three protein 3) (U3 small nucleolar R-associated protein 3) (U3 snoR-associated protein 11), Uncharacterized protein (Fragment)	SAS10 UTP3 YDL153C D1545,	IPR018972;, IPR007087;IPR015880;IPR013087;				PF08763;PF16885;PF16905;PF00520;					30.4, 38.1				cell cycle [GO:0007049]; endonucleolytic cleavage in 5'-ETS of tricistronic rR transcript (SSU-rR, 5.8S rR, LSU-rR) [GO:0000480]; endonucleolytic cleavage in ITS1 to separate SSU-rR from 5.8S rR and LSU-rR from tricistronic rR transcript (SSU-rR, 5.8S rR, LSU-rR) [GO:0000447]; endonucleolytic cleavage to generate mature 5'-end of SSU-rR from (SSU-rR, 5.8S rR, LSU-rR) [GO:0000472]; maturation of S…	, DOMAIN 1 26 C2H2-type. {ECO:0000259|PROSITE:PS50157}.; DOMAIN 27 54 C2H2-type. {ECO:0000259|PROSITE:PS50157}.; DOMAIN 55 82 C2H2-type. {ECO:0000259|PROSITE:PS50157}.; DOMAIN 83 110 C2H2-type. {ECO:0000259|PROSITE:PS50157}.; DOMAIN 116 143 C2H2-type. {ECO:0000259|PROSITE:PS50157}.; DOMAIN 144 170 C2H2-type. {ECO:0000259|PROSITE:PS50157}.; DOMAIN 171 198 C2H2-type. {ECO:0000259|PROSITE:PS50157}.;…
NOV_011018	Cluster1	2.1802	1.9223	1.6818	1.17725	1.74039	0.13677							A0AUJ5, A0A023WYV3	Genome polyprotein [Cleaved into: P1 proteinase (EC 3.4.-.-) (N-terminal protein); Helper component proteinase (HC-pro) (EC 3.4.22.45); Protein P3; 6 kDa protein 1 (6K1); Cytoplasmic inclusion protein (CI) (EC 3.6.4.-); 6 kDa protein 2 (6K2); Viral genome-linked protein (VPg); Nuclear inclusion protein A (NI-a) (NIa) (EC 3.4.22.44) (49 kDa proteinase) (49 kDa-Pro) (NIa-pro); Nuclear inclusion pro…	, UIB01_15375	IPR027450;IPR001456;IPR031159;IPR014001;IPR001650;IPR005123;IPR027417;IPR002540;IPR009003;IPR001592;IPR001730;IPR013648;IPR001205;IPR007094;, IPR011577;IPR016174;				PF03595;, PF03595;					33.5, 37.4				R-protein covalent cross-linking [GO:0018144]; transcription, D-templated [GO:0006351]; viral R genome replication [GO:0039694], respiratory electron transport chain [GO:0022904]	DOMAIN 183 277 Fe2OG dioxygenase. {ECO:0000255|PROSITE-ProRule:PRU00805}.; DOMAIN 948 1070 Peptidase C6. {ECO:0000255|PROSITE-ProRule:PRU01080}.; DOMAIN 1540 1692 Helicase ATP-binding. {ECO:0000255|PROSITE-ProRule:PRU00541}.; DOMAIN 1696 1869 Helicase C-terminal. {ECO:0000255|PROSITE-ProRule:PRU00542}.; DOMAIN 2354 2570 Peptidase C4. {ECO:0000255|PROSITE-ProRule:PRU00766}.; DOMAIN 2850 2974 RdRp …
gene8911	Cluster1	1.87	1.97741	2.13449	0.962104	1.736	0.208486	347243	GO:0003824, GO:0030976, GO:0000287, GO:0016831	catalytic activity, thiamin pyrophosphate binding, magnesium ion binding, carboxy-lyase activity	IPR012000, IPR011766, IPR012001, IPR012110	Thiamine pyrophosphate enzyme, central region, Thiamine pyrophosphate enzyme, C-terminal TPP-binding, Thiamine pyrophosphate enzyme, N-terminal TPP binding region, Pyruvate decarboxylase/indolepyruvate decarboxylase	TPP_enzyme_M, TPP_enzyme_C, TPP_enzyme_N, Pyruvate decarboxylase/indolepyruvate decarboxylase	Q6FJA3	Pyruvate decarboxylase (EC 4.1.1.1)	PDC1 PDC CAGL0M07920g	IPR000399, IPR011766, IPR012000, IPR012001, IPR012110, IPR029035, IPR029061	TPP-binding enzyme, conserved site, Thiamine pyrophosphate enzyme, C-terminal TPP-binding, Thiamine pyrophosphate enzyme, central domain, Thiamine pyrophosphate enzyme, N-terminal TPP-binding domain, Thiamine pyrophosphate (TPP)-dependent enzyme, DHS-like D/FAD-binding domain, Thiamin diphosphate-binding fold	cgr:CAGL0M07920g	Q7S4N8	IPR011766, IPR012000, IPR012001, IPR012110, IPR029035, IPR029061	Thiamine pyrophosphate enzyme, C-terminal TPP-binding, Thiamine pyrophosphate enzyme, central domain, Thiamine pyrophosphate enzyme, N-terminal TPP-binding domain, Thiamine pyrophosphate (TPP)-dependent enzyme, DHS-like D/FAD-binding domain, Thiamin diphosphate-binding fold	EAA30481.3		99.64	50.65	68.03	68.03
gene7583	Cluster1	1.69464	1.29324	1.26632	2.67512	1.73233	0.325061	340040	GO:0006865, GO:0015171, GO:0016020, GO:0006810	amino acid transport, amino acid transmembrane transporter activity, membrane, transport	IPR004841, IPR002293	Amino acid permease-associated region, Amino acid/polyamine transporter I	AA_permease, Amino acid transporter	P32837	GABA-specific permease (GABA-specific transport protein)	UGA4 YDL210W D1037	IPR002293, IPR004840	Amino acid/polyamine transporter I, Amino acid permease, conserved site	sce:YDL210W	F0XCI7	IPR002293	Amino acid/polyamine transporter I	EFX04687.1	XM_014318694.1	100	57.14	90.18	90.18	80.84
gene1256	Cluster1	1.5356	1.97161	2.04591	1.36963	1.73069	0.081458	241259						Q891P2	V-type ATP synthase beta chain 2 (V-ATPase subunit B 2)	atpB2 CTC_02327	IPR000194, IPR000793, IPR004100, IPR020003, IPR022879, IPR024034, IPR027417	ATPase, F1/V1/A1 complex, alpha/beta subunit, nucleotide-binding domain, ATPase, F1/V1/A1 complex, alpha/beta subunit, C-terminal, ATPase, F1 complex alpha/beta subunit, N-terminal domain, ATPase, alpha/beta subunit, nucleotide-binding domain, active site, V-type ATP synthase regulatory subunit B/beta, ATPase, F1 complex beta subunit/V1 complex, C-terminal, P-loop containing nucleoside triphospha…	ctc:CTC02327	R8BDP7			XP_007917740.1		100	34.43	56.4	56.4
gene4969	Cluster1	1.6829	1.88304	1.23717	2.11217	1.72882	0.103642	321523		unknown_gene		unknown_gene			unknown_gene			unknown_gene		W9PB17		unknown_gene	EXA37110.1		100		49.54	49.54
NOV_004506	Cluster1	1.93762	1.25712	1.55047	2.16298	1.72705	0.121597								unknown_gene	unknown_gene	unknown_gene				PF00385;,									unknown_gene
gene2194	Cluster1	2.04178	2.04892	1.62686	1.18778	1.72634	0.125877	52851		unknown_gene		unknown_gene			unknown_gene			unknown_gene		A0A086STA8		unknown_gene	KFH40340.1		100		41.41	41.41
gene7691	Cluster1	1.62376	2.37912	1.25583	1.64343	1.72554	0.166223	340229	GO:0005507	copper ion binding	IPR011701, IPR002355, IPR016196	Major facilitator superfamily MFS-1, Multicopper oxidase, copper-binding site, MFS general substrate transporter	MFS_1, MULTICOPPER_OXIDASE1, MFS general substrate transporter	Q00357	Putative HC-toxin efflux carrier TOXA	TOXA	IPR011701, IPR020846	Major facilitator superfamily, Major facilitator superfamily domain		S3CM64	IPR011701, IPR020846	Major facilitator superfamily, Major facilitator superfamily domain	XP_008087598.1	XM_001228822.1	100	29.44	72.41	72.41	91.67
gene7950	Cluster1	1.36343	1.93927	2.42543	1.1378	1.71648	0.252941	70325						P02011	Hemoglobin subunit alpha-3 (Alpha-3-globin) (Hemoglobin alpha-3 chain) (Hemoglobin alpha-III chain, larval)		IPR000971, IPR002338, IPR002339, IPR009050, IPR012292	Globin, Haemoglobin, alpha, Haemoglobin, pi, Globin-like, Globin/Protoglobin		S3CD15	IPR011250, IPR020915	Outer membrane protein/outer membrane enzyme PagP, beta-barrel, Uncharacterised protein family UPF0311	EPE10807.1		100	33.33	47.69	47.69
gene2526	Cluster1	1.82608	2.09531	1.71437	1.22862	1.7161	0.0983839	343570												B6QJK7	IPR008441, IPR029044	Capsular polysaccharide synthesis, Nucleotide-diphospho-sugar transferases	XP_002149648.1		100		60.9	60.9
gene1224	Cluster1	0.789626	1.93987	2.0536	2.07195	1.71376	0.287235	58981	GO:0004650, GO:0005975	polygalacturonase activity, carbohydrate metabolic process	IPR000743, IPR006626, IPR011050	Glycoside hydrolase, family 28, Parallel beta-helix repeat, Pectin lyase fold/virulence factor	Glyco_hydro_28, no description, POLYGALACTUROSE, Pectin lyase-like	Q5ATQ3	Endopolygalacturonase AN8327 (EC 3.2.1.15) (Pectinase AN8327) (Polygalacturonase AN8327)	AN8327	IPR000743, IPR006626, IPR011050, IPR012334	Glycoside hydrolase, family 28, Parallel beta-helix repeat, Pectin lyase fold/virulence factor, Pectin lyase fold	ani:AN8327.2	M7UTU7	IPR000743, IPR006626, IPR011050, IPR012334	Glycoside hydrolase, family 28, Parallel beta-helix repeat, Pectin lyase fold/virulence factor, Pectin lyase fold	AAC24953.1	XM_001399591.2	92.39	69.23	74.42	74.42	100
gene8622	Cluster1	1.87273	2.26082	1.7152	0.984933	1.70842	0.213904	73815						A5UN64	30S ribosomal protein S2	rps2 Msm_1437	IPR001865, IPR005707, IPR018130, IPR023454, IPR023591	Ribosomal protein S2, Ribosomal protein S2, eukaryotic/archaeal, Ribosomal protein S2, conserved site, Ribosomal protein S2, archaeal, Ribosomal protein S2, flavodoxin-like domain	msi:Msm_1437						85.02	44.44
gene3420	Cluster1	2.08193	0.651823	2.01007	2.08518	1.70725	0.372209	71518		unknown_gene		unknown_gene			unknown_gene			unknown_gene				unknown_gene
gene1774	Cluster1	1.59515	2.03013	1.73566	1.45988	1.70521	0.0446994	67250						Q03455	Probable zinc transporter MSC2 (Meiotic sister chromatid recombination protein 2)	MSC2 YDR205W YD8142.02	IPR002524, IPR027469	Cation efflux protein, Cation efflux protein transmembrane domain	sce:YDR205W						100	32.84
gene6062	Cluster1	2.16464	1.6155	1.59352	1.4413	1.70374	0.0753099	255275						Q8IWU4	Zinc transporter 8 (ZnT-8) (Solute carrier family 30 member 8)	SLC30A8 ZNT8	IPR002524, IPR027469	Cation efflux protein, Cation efflux protein transmembrane domain	hsa:169026	M4FWZ8			XP_009222549.1		100	45.71	69.32	70.45
gene8725	Cluster1	0.702175	1.25865	2.17927	2.67073	1.70271	0.590609	49307	GO:0048037, GO:0008152, GO:0003824, GO:0005488	cofactor binding, metabolic process, catalytic activity, binding	IPR014030, IPR014043, IPR014031, IPR013154, IPR013968, IPR006163, IPR009081, IPR011032, IPR016040, IPR016035, IPR016039, IPR016036	Beta-ketoacyl synthase, N-terminal, Acyl transferase, Beta-ketoacyl synthase, C-terminal, Alcohol dehydrogenase GroES-like, Polyketide synthase, KR, Phosphopantetheine-binding, Acyl carrier protein-like, GroES-like, D(P)-binding, Acyl transferase/acyl hydrolase/lysophospholipase, Thiolase-like, Malonyl-CoA ACP transacylase, ACP-binding	ketoacyl-synt, Acyl_transf_1, Ketoacyl-synt_C, ADH_N, KR, ACP_DOMAIN, B_KETOACYL_SYNTHASE, ACP-like, GroES-like, D(P)-binding Rossmann-fold domains, FabD/lysophospholipase-like, Thiolase-like, Probable ACP-binding domain of malonyl-CoA ACP transacylase	Q9Y7D5	Lovastatin diketide synthase LovF (LDKS) (EC 2.3.1.244)	lovF	IPR001227, IPR006162, IPR009081, IPR011032, IPR013149, IPR013217, IPR013968, IPR014030, IPR014031, IPR014043, IPR016035, IPR016036, IPR016039, IPR016040, IPR018201, IPR020801, IPR020807, IPR020841, IPR020843, IPR029063	Acyl transferase domain, Phosphopantetheine attachment site, Acyl carrier protein-like, GroES-like, Alcohol dehydrogenase, C-terminal, Methyltransferase type 12, Polyketide synthase, ketoreductase domain, Beta-ketoacyl synthase, N-terminal, Beta-ketoacyl synthase, C-terminal, Acyl transferase, Acyl transferase/acyl hydrolase/lysophospholipase, Malonyl-CoA ACP transacylase, ACP-binding, Thiolase-l…		N4V418	IPR001227, IPR009081, IPR011032, IPR013149, IPR013154, IPR013968, IPR014030, IPR014031, IPR014043, IPR016035, IPR016036, IPR016039, IPR016040, IPR018201, IPR020801, IPR020807, IPR020841, IPR020843, IPR032821	Acyl transferase domain, Acyl carrier protein-like, GroES-like, Alcohol dehydrogenase, C-terminal, Alcohol dehydrogenase, N-terminal, Polyketide synthase, ketoreductase domain, Beta-ketoacyl synthase, N-terminal, Beta-ketoacyl synthase, C-terminal, Acyl transferase, Acyl transferase/acyl hydrolase/lysophospholipase, Malonyl-CoA ACP transacylase, ACP-binding, Thiolase-like, D(P)-binding domain, Be…	ENH82089.1		99.02	55.88	76	76
gene2361	Cluster1	1.6501	2.00009	1.47736	1.67391	1.70036	0.0356989	283593	GO:0004497, GO:0006118, GO:0006725, GO:0008152, GO:0016491	monooxygenase activity, electron transport, aromatic compound metabolic process, metabolic process, oxidoreductase activity	IPR003042, IPR002938	Aromatic-ring hydroxylase, Monooxygenase, FAD-binding	RNGMNOXGSE, FAD_binding_3	P23262	Salicylate hydroxylase (EC 1.14.13.1) (Salicylate 1-monooxygenase)	nahG	IPR002938, IPR017631, IPR023753	FAD-binding domain, Salicylate 1-monooxygenase, FAD/D(P)-binding domain	pg:3974216	A0A094B1B9	IPR002938, IPR023753	FAD-binding domain, FAD/D(P)-binding domain	KFY33393.1		100	32.2	55.13	55.13
gene9657	Cluster1	1.75963	2.08405	1.8804	1.07066	1.69868	0.144914	72348		unknown_gene		unknown_gene			unknown_gene			unknown_gene				unknown_gene			83.92
gene19	Cluster1	2.30254	1.53752	1.39121	1.55624	1.69688	0.126359	104930		unknown_gene		unknown_gene			unknown_gene			unknown_gene		G0RP38		unknown_gene	XP_006967034.1		100		64.29	64.29
gene6817	Cluster1	1.66018	2.10411	1.08067	1.93534	1.69507	0.150937	330500	GO:0004713, GO:0005524, GO:0006468	protein-tyrosine kinase activity, ATP binding, protein amino acid phosphorylation	IPR002573, IPR008266, IPR000408, IPR011009	Choline/ethanolamine kinase, Tyrosine protein kinase, active site, Regulator of chromosome condensation, RCC1, Protein kinase-like	Choline_kinase, PROTEIN_KISE_TYR, RCC1_2, Protein kinase-like (PK-like)	P46559	Choline kinase B2 (EC 2.7.1.32)	ckb-2 B0285.9	IPR011009	Protein kinase-like domain	cel:CELE_B0285.9	A0A094A6Q7	IPR002575, IPR011009	Aminoglycoside phosphotransferase, Protein kinase-like domain	KFY18840.1		100	28.4	50.21	50.21
NOV_007939	Cluster1	1.82744	0.935676	1.01911	2.99706	1.69482	0.686577							Q8KBY3	Polyribonucleotide nucleotidyltransferase (EC 2.7.7.8) (Polynucleotide phosphorylase) (PNPase)	pnp CT1649	IPR001247;IPR015847;IPR004087;IPR004088;IPR012340;IPR012162;IPR027408;IPR015848;IPR020568;IPR022967;IPR003029;				unknown_gene					33.9				mR catabolic process [GO:0006402]; R processing [GO:0006396]	DOMAIN 570 629 KH. {ECO:0000255|HAMAP-Rule:MF_01595}.; DOMAIN 639 713 S1 motif. {ECO:0000255|HAMAP-Rule:MF_01595}.
gene9476	Cluster1	2.56883	1.08332	1.21451	1.90226	1.69223	0.352882	72863												M7SJE3	IPR022025	Putative amidoligase enzyme	XP_007796589.1		100		29.8	29.8
gene58	Cluster1	1.35848	1.28015	1.69193	2.43241	1.69074	0.207261	36360			IPR008949	Terpenoid synthase	Terpenoid synthases	Q5N4W6	Uroporphyrinogen decarboxylase (UPD) (URO-D) (EC 4.1.1.37)	hemE syc0463_c	IPR000257, IPR006361	Uroporphyrinogen decarboxylase (URO-D), Uroporphyrinogen decarboxylase HemE	syc:syc0463_c	M7T1F4	IPR008949, IPR024652	Isoprenoid synthase domain, Trichodiene synthase	XP_007790240.1		100	55.56	57.47	57.47
gene9150	Cluster1	0.670632	2.00349	0.853262	3.22381	1.6878	1.04752	341496	GO:0003824, GO:0044237, GO:0050662, GO:0005488, GO:0008152	catalytic activity, cellular metabolic process, coenzyme binding, binding, metabolic process	IPR001509, IPR016040	D-dependent epimerase/dehydratase, D(P)-binding	Epimerase, D(P)-binding Rossmann-fold domains							R8BNM5	IPR000534, IPR001509, IPR016040	Semialdehyde dehydrogenase, D-binding, D-dependent epimerase/dehydratase, N-terminal domain, D(P)-binding domain	XP_007914570.1		78.07		47.96	47.96
gene10336	Cluster1	0.656841	1.60211	0.96505	3.52676	1.68769	1.24359	358133	GO:0004190, GO:0006508	aspartic-type endopeptidase activity, proteolysis	IPR000250, IPR008985	Peptidase G1, eqolisin, Concanavalin A-like lectin/glucanase	Q00550_CRYPA_Q00550;, SCYTLDPTASE, Peptidase_A4, Concanavalin A-like lectins/glucanases	P24665	Aspergillopepsin-2 (EC 3.4.23.19) (Acid protease A) (Aspergillopepsin II) (Proctase A) [Cleaved into: Aspergillopepsin-2 light chain (Aspergillopepsin II light chain); Aspergillopepsin-2 heavy chain (Aspergillopepsin II heavy chain)]		IPR000250, IPR013320	Peptidase G1, Concanavalin A-like lectin/glucanase domain		Q00550	IPR000250, IPR013320	Peptidase G1, Concanavalin A-like lectin/glucanase domain	CAA58822.1	XM_003662488.1	100	62.5	100	100	87.5
gene10376	Cluster1	0.764341	1.82919	0.807889	3.34404	1.68637	1.09753	324303	GO:0006808, GO:0016564, GO:0003824, GO:0005488, GO:0008152	regulation of nitrogen utilization, transcription repressor activity, catalytic activity, binding, metabolic process	IPR008030, IPR016040	NmrA-like, D(P)-binding	NmrA, D(P)-binding Rossmann-fold domains	O31512	Uncharacterized oxidoreductase YesF (EC 1.-.-.-)	yesF yeeM yfxB BSU06880	IPR016040	D(P)-binding domain	bsu:BSU06880	B6HMU1	IPR008030, IPR016040	NmrA-like domain, D(P)-binding domain	XP_002568349.1		100	24.21	40.45	40.45
gene908	Cluster1	1.61681	2.01981	1.61074	1.49675	1.68602	0.0394249	59909	GO:0031177, GO:0048037, GO:0008152, GO:0003824, GO:0005488	phosphopantetheine binding, cofactor binding, metabolic process, catalytic activity, binding	IPR014030, IPR006163, IPR014043, IPR014031, IPR013120, IPR013217, IPR006162, IPR009081, IPR016040, IPR016035, IPR016039, IPR016036	Beta-ketoacyl synthase, N-terminal, Phosphopantetheine-binding, Acyl transferase, Beta-ketoacyl synthase, C-terminal, Male sterility, D-binding, Methyltransferase type 12, Phosphopantetheine attachment site, Acyl carrier protein-like, D(P)-binding, Acyl transferase/acyl hydrolase/lysophospholipase, Thiolase-like, Malonyl-CoA ACP transacylase, ACP-binding	ketoacyl-synt, PP-binding, Acyl_transf_1, Ketoacyl-synt_C, D_binding_4, Methyltransf_12, ACP_DOMAIN, PHOSPHOPANTETHEINE, ACP-like, D(P)-binding Rossmann-fold domains, FabD/lysophospholipase-like, Thiolase-like, Probable ACP-binding domain of malonyl-CoA ACP transacylase	Q03149	Conidial yellow pigment biosynthesis polyketide synthase (PKS) (EC 2.3.1.-)	wA AN8209	IPR001031, IPR001227, IPR006162, IPR009081, IPR014030, IPR014031, IPR014043, IPR016035, IPR016036, IPR016039, IPR018201, IPR020801, IPR020807, IPR029058, IPR030918, IPR032088	Thioesterase, Acyl transferase domain, Phosphopantetheine attachment site, Acyl carrier protein-like, Beta-ketoacyl synthase, N-terminal, Beta-ketoacyl synthase, C-terminal, Acyl transferase, Acyl transferase/acyl hydrolase/lysophospholipase, Malonyl-CoA ACP transacylase, ACP-binding, Thiolase-like, Beta-ketoacyl synthase, active site, Polyketide synthase, acyl transferase domain, Polyketide synt…	ani:AN8209.2	A0A093Y7H6	IPR001227, IPR006162, IPR009081, IPR013120, IPR013217, IPR014030, IPR014031, IPR014043, IPR016035, IPR016036, IPR016039, IPR016040, IPR020801, IPR020841, IPR029063, IPR032088	Acyl transferase domain, Phosphopantetheine attachment site, Acyl carrier protein-like, Male sterility, D-binding, Methyltransferase type 12, Beta-ketoacyl synthase, N-terminal, Beta-ketoacyl synthase, C-terminal, Acyl transferase, Acyl transferase/acyl hydrolase/lysophospholipase, Malonyl-CoA ACP transacylase, ACP-binding, Thiolase-like, D(P)-binding domain, Polyketide synthase, acyl transferase…	KFX98702.1	XM_013485145.1	100	29.62	74	74	70.96
gene1895	Cluster1	1.35225	2.1955	2.23575	0.960169	1.68592	0.30001	326520						Q1IWK0	tR (guanine-N(7)-)-methyltransferase (EC 2.1.1.33) (tR (guanine(46)-N(7))-methyltransferase) (tR(m7G46)-methyltransferase)	trmB Dgeo_2090	IPR003358, IPR029063	tR (guanine-N-7) methyltransferase, Trmb type, S-adenosyl-L-methionine-dependent methyltransferase	dge:Dgeo_2090	Q872K4			CAD70725.1		99.28	28.36	30.67	30.67
NOV_007961	Cluster1	2.42149	1.32477	2.25141	0.743197	1.68522	0.469997							Q9Y4A0, A0A066WZD6	Jerky protein homolog-like (Human homolog of mouse jerky gene protein) (HHMJG), Putative transposase	JRKL, CSUB01_05966	IPR004875;IPR009057;IPR006600;IPR007889;, IPR004875;IPR009057;IPR006600;IPR007889;				PF10270;, PF00271;PF04851;					66.6, 473				central nervous system development [GO:0007417],	DOMAIN 1 52 HTH psq-type. {ECO:0000255|PROSITE-ProRule:PRU00320}.; DOMAIN 67 139 HTH CENPB-type. {ECO:0000255|PROSITE-ProRule:PRU00583}.; DOMAIN 168 385 DDE., DOMAIN 48 118 HTH CENPB-type D-binding. {ECO:0000259|PROSITE:PS51253}.
gene6091	Cluster1	1.59433	1.10024	1.8561	2.18419	1.68372	0.157156	338784	GO:0003824, GO:0005488, GO:0008152, GO:0000252, GO:0000253, GO:0004033, GO:0004448, GO:0004495, GO:0008875, GO:0016229, GO:0018451, GO:0018452, GO:0018453, GO:0032442, GO:0033764, GO:0033765, GO:0043713, GO:0048258, GO:0051990	catalytic activity, binding, metabolic process, C-3 sterol dehydrogenase (C-4 sterol decarboxylase) activity, 3-keto sterol reductase activity, aldo-keto reductase activity, isocitrate dehydrogenase activity, mevaldate reductase activity, gluconate dehydrogenase activity, steroid dehydrogenase activity, epoxide dehydrogenase activity, 5-exo-hydroxycamphor dehydrogenase activity, 2-hydroxytetrahyd…	IPR016040	D(P)-binding	D(P)-binding Rossmann-fold domains	Q9HBH5	Retinol dehydrogenase 14 (EC 1.1.1.-) (Alcohol dehydrogenase PAN2) (Short chain dehydrogenase/reductase family 7C member 4)	RDH14 PAN2 SDR7C4 UNQ529/PRO1072	IPR002198, IPR002347, IPR016040	Short-chain dehydrogenase/reductase SDR, Glucose/ribitol dehydrogenase, D(P)-binding domain	hsa:57665	W3WRL6	IPR016040	D(P)-binding domain	XP_007838643.1		100	47.83	67.53	67.53
gene627	Cluster1	1.21852	1.52838	2.62281	1.35896	1.68217	0.306971	336241	GO:0005524, GO:0015662, GO:0015992, GO:0016020, GO:0006810, GO:0006812, GO:0003824, GO:0008152, GO:0005388, GO:0005509, GO:0006816, GO:0015085, GO:0016820	ATP binding, ATPase activity, coupled to transmembrane movement of ions, phosphorylative mechanism, proton transport, membrane, transport, cation transport, catalytic activity, metabolic process, calcium-transporting ATPase activity, calcium ion binding, calcium ion transport, calcium ion transmembrane transporter activity, hydrolase activity, acting on acid anhydrides, catalyzing transmembrane m…	IPR001757, IPR000695, IPR008250, IPR006068, IPR004014, IPR005834, IPR006408	ATPase, P-type, K/Mg/Cd/Cu/Zn/Na/Ca/Na/H-transporter, H+ transporting ATPase, proton pump, E1-E2 ATPase-associated region, ATPase, P-type cation-transporter, C-terminal, ATPase, P-type cation-transporter, N-terminal, Haloacid dehalogenase-like hydrolase, Calcium-translocating P-type ATPase, PMCA-type	CATATPASE, HATPASE, E1-E2_ATPase, Cation_ATPase_C, Cation_ATPase_N, Hydrolase, ATPase_P-type: ATPase, P-type (transpor, ATPase-IIB_Ca: calcium-translocating P-, ATPASE_E1_E2	Q9HDW7	Calcium-transporting ATPase 2 (EC 3.6.3.8)	pmc1 SPAPB2B4.04c	IPR001757, IPR004014, IPR006068, IPR006408, IPR008250, IPR018303, IPR023214, IPR023298, IPR023299	P-type ATPase, Cation-transporting P-type ATPase, N-terminal, Cation-transporting P-type ATPase, C-terminal, P-type ATPase, subfamily IIB, P-type ATPase, A domain, P-type ATPase, phosphorylation site, HAD-like domain, P-type ATPase, transmembrane domain, P-type ATPase, cytoplasmic domain N	spo:SPAPB2B4.04c	A0A084QKG7	IPR001757, IPR004014, IPR006068, IPR006408, IPR008250, IPR018303, IPR023214, IPR023298, IPR023299	P-type ATPase, Cation-transporting P-type ATPase, N-terminal, Cation-transporting P-type ATPase, C-terminal, P-type ATPase, subfamily IIB, P-type ATPase, A domain, P-type ATPase, phosphorylation site, HAD-like domain, P-type ATPase, transmembrane domain, P-type ATPase, cytoplasmic domain N	KFA64452.1	XM_007286930.1	99.12	77.42	92.59	92.59	75.68
NOV_013519	Cluster1	1.63473	1.53348	1.30402	2.24693	1.67979	0.121572							P47125, F7W5S5	Indoleamine 2,3-dioxygenase (IDO) (EC 1.13.11.52) (Biosynthesis of nicotinic acid protein 2), WGS project CABT00000000 data, contig 2.31	B2 YJR078W J1840, SMAC_08990	IPR000898;, IPR000898;				PF02245;					304, 715				de novo' D biosynthetic process from tryptophan [GO:0034354]; tryptophan catabolic process to kynurenine [GO:0019441],	,
gene3825	Cluster1	1.70112	1.23722	1.6842	2.08116	1.67592	0.0893465	109359						Q6KI53	50S ribosomal protein L23	rplW MMOB2370	IPR012677, IPR012678, IPR013025	Nucleotide-binding alpha-beta plait domain, Ribosomal protein L23/L15e core domain, Ribosomal protein L25/L23	mmo:MMOB2370						100	33.33
gene6869	Cluster1	0.812066	0.518862	1.83259	3.50379	1.66683	1.36259	260668	GO:0004601, GO:0006118, GO:0006979, GO:0020037, GO:0016688	peroxidase activity, electron transport, response to oxidative stress, heme binding, L-ascorbate peroxidase activity	IPR002016, IPR000823, IPR010255	Haem peroxidase, plant/fungal/bacterial, Plant peroxidase, Haem peroxidase	PEROXIDASE, PLPEROXIDASE, peroxidase, PEROXIDASE_4, PEROXIDASE_1, Heme-dependent peroxidases	Q9UR19	Versatile peroxidase VPL1 (EC 1.11.1.16) (Versatile liquid phase peroxidase 1)	vpl1	IPR001621, IPR002016, IPR010255, IPR019793, IPR019794, IPR024589	Fungal ligninase, Haem peroxidase, plant/fungal/bacterial, Haem peroxidase, Peroxidases heam-ligand binding site, Peroxidase, active site, Fungal ligninase, C-terminal		M7SHE8	IPR000823, IPR002016, IPR010255, IPR019794	Plant peroxidase, Haem peroxidase, plant/fungal/bacterial, Haem peroxidase, Peroxidase, active site	XP_007797214.1		88.1	25.69	41.35	41.35
NOV_013653	Cluster1	1.5217	2.00521	1.62521	1.51435	1.66662	0.0401371							F9EIE1	Resolvase	HMPREF9062_2213	IPR006119;				PF06849;PF06973;					38.1					DOMAIN 2 102 Resolvase/invertase-type recombinase catalytic. {ECO:0000259|PROSITE:PS51736}.
gene4802	Cluster1	1.75936	1.64674	1.12024	2.11441	1.66019	0.126968	337847	GO:0006810, GO:0008519, GO:0016020	transport, ammonium transmembrane transporter activity, membrane	IPR010256, IPR001905	Rh-like protein/ammonium transporter, Ammonium transporter	Ammonium_transp, amt: ammonium transporter, AMMONIUM_TRANSP, Ammonium ransporter (Pfam 00909)	Q84KJ6	Ammonium transporter 3 member 1 (OsAMT3;1)	AMT3-1 Os01g0870300 LOC_Os01g65000 OsJ_04233	IPR001905, IPR018047, IPR024041, IPR029020	Ammonium transporter, Ammonium transporter, conserved site, Ammonium transporter AmtB-like domain, Ammonium/urea transporter	osa:4324937	X0F9W3	IPR001905, IPR018047, IPR024041, IPR029020	Ammonium transporter, Ammonium transporter, conserved site, Ammonium transporter AmtB-like domain, Ammonium/urea transporter	EXL47648.1	XM_004970670.3	100	58.57	84.37	84.37	72.88
gene894	Cluster1	1.43287	1.69369	2.03392	1.47148	1.65799	0.057015	354699												I7WHU1	IPR006118, IPR006119, IPR011109, IPR025827	Recombinase, conserved site, Resolvase, N-terminal catalytic domain, D-binding recombinase domain, Recombinase zinc beta ribbon domain	WP_003047414.1		100		37.5	37.5
gene6053	Cluster1	1.12158	1.03865	2.52023	1.93513	1.6539	0.372876	330377		unknown_gene		unknown_gene			unknown_gene			unknown_gene		N4U5C3		unknown_gene	ENH70384.1		100		50	50
gene2907	Cluster1	1.3684	1.73942	1.29784	2.20377	1.65236	0.129489	355004	GO:0004089, GO:0008270, GO:0015976	carbonate dehydratase activity, zinc ion binding, carbon utilization	IPR003016, IPR001765	2-oxo acid dehydrogenase, lipoyl-binding site, Carbonic anhydrase	LIPOYL, beta-carbonic anhydrase, cab	G0WXL9	Carbon disulfide lyase (EC 4.4.1.27) (Carbon disulfide hydrolase)	csh	IPR001765	Carbonic anhydrase	ag:AEL19654	V9CZ02	IPR001765	Carbonic anhydrase	XP_008731401.1		98.21	50	63.64	63.64
gene106	Cluster1	1.13053	1.61101	0.802719	3.06222	1.65162	0.745905	343760	GO:0005524, GO:0016887, GO:0000166, GO:0017111, GO:0006810, GO:0016021, GO:0042626	ATP binding, ATPase activity, nucleotide binding, nucleoside-triphosphatase activity, transport, integral to membrane, ATPase activity, coupled to transmembrane movement of substances	IPR003439, IPR013525, IPR010929, IPR003593	ABC transporter-like, ABC-2 type transporter, CDR ABC transporter, AAA+ ATPase, core	Q9Y840_MYCGR_Q9Y840;, ABC_tran, ABC2_membrane, PDR_CDR, no description, ABC_TRANSPORTER_2, ABC_TRANSPORTER_1	P41820	Brefeldin A resistance protein	bfr1 hba2 SPCC18B5.01c SPCPJ732.04c	IPR003439, IPR003593, IPR005285, IPR010929, IPR013525, IPR017871, IPR027417, IPR029481	ABC transporter-like, AAA+ ATPase domain, Pleiotropic drug resistance protein PDR/CDR, CDR ABC transporter, ABC-2 type transporter, ABC transporter, conserved site, P-loop containing nucleoside triphosphate hydrolase, ABC-transporter extracellular N-terminal domain	spo:SPCC18B5.01c	A0A074VRW3	IPR003439, IPR003593, IPR010929, IPR013525, IPR017871, IPR027417, IPR029481	ABC transporter-like, AAA+ ATPase domain, CDR ABC transporter, ABC-2 type transporter, ABC transporter, conserved site, P-loop containing nucleoside triphosphate hydrolase, ABC-transporter extracellular N-terminal domain	KEQ63153.1	XM_008033381.1	94.89	37.67	66.74	66.74	77.1
gene8813	Cluster1	1.77735	1.59691	2.08099	1.13275	1.647	0.118074	231232		unknown_gene		unknown_gene			unknown_gene			unknown_gene		A0A010QA17		unknown_gene	XP_007602813.1		100		74.19	74.19
gene3602	Cluster1	0.0971744	2.54099	2.15791	1.77509	1.64279	0.869636	337218	GO:0008152, GO:0016491, GO:0003824, GO:0005488, GO:0043738, GO:0043826, GO:0043883, GO:0051341	metabolic process, oxidoreductase activity, catalytic activity, binding, F420H2 dehydrogenase activity, sulfur oxygenase reductase activity, malolactic enzyme activity, regulation of oxidoreductase activity	IPR002198, IPR002347, IPR016040	Short-chain dehydrogenase/reductase SDR, Glucose/ribitol dehydrogenase, D(P)-binding	SDRFAMILY, GDHRDH, adh_short, ADH_SHORT, D(P)-binding Rossmann-fold domains	Q10216	Uncharacterized oxidoreductase C4H3.08 (EC 1.-.-.-)	SPAC4H3.08	IPR002198, IPR002347, IPR016040, IPR020904	Short-chain dehydrogenase/reductase SDR, Glucose/ribitol dehydrogenase, D(P)-binding domain, Short-chain dehydrogenase/reductase, conserved site	spo:SPAC4H3.08	H6CB95	IPR002198, IPR002347, IPR016040, IPR020904	Short-chain dehydrogenase/reductase SDR, Glucose/ribitol dehydrogenase, D(P)-binding domain, Short-chain dehydrogenase/reductase, conserved site	XP_009161503.1		93.55	55.03	76.06	76.06
gene9440	Cluster1	1.47274	1.16331	0.920907	3.01387	1.64271	0.66495	264674	GO:0015520, GO:0015904, GO:0016021, GO:0046677, GO:0005215, GO:0006810	tetracycline:hydrogen antiporter activity, tetracycline transport, integral to membrane, response to antibiotic, transporter activity, transport	IPR001411, IPR011701, IPR007114, IPR016196	Tetracycline resistance protein, TetB, Major facilitator superfamily MFS-1, Major facilitator superfamily, MFS general substrate transporter	TCRTETB, MFS_1, MFS, MFS general substrate transporter	P9WG85	Uncharacterized MFS-type transporter Rv1877	Rv1877	IPR001958, IPR005829, IPR011701, IPR011991, IPR020846	Tetracycline resistance protein TetA/multidrug resistance protein MdtG, Sugar transporter, conserved site, Major facilitator superfamily, Winged helix-turn-helix D-binding domain, Major facilitator superfamily domain	mtu:Rv1877	A0A084FV67	IPR011701, IPR020846	Major facilitator superfamily, Major facilitator superfamily domain	KEZ38979.1		100	30.09	69.91	69.91
gene6849	Cluster1	1.30276	1.70835	0.969202	2.58742	1.64193	0.366492	258472	GO:0005215, GO:0006810, GO:0016021	transporter activity, transport, integral to membrane	IPR011701, IPR007114, IPR016196	Major facilitator superfamily MFS-1, Major facilitator superfamily, MFS general substrate transporter	MFS_1, MFS, MFS general substrate transporter	P9WG87	Uncharacterized MFS-type transporter Rv1250	Rv1250	IPR004638, IPR011701, IPR020846	Drug resistance transporter EmrB/QacA subfamily, Major facilitator superfamily, Major facilitator superfamily domain	mtu:Rv1250, mtv:RVBD_1250	A0A010QGP7	IPR006175, IPR011701, IPR013813, IPR020846	YjgF/YER057c/UK114 family, Major facilitator superfamily, Endoribonuclease L-PSP/chorismate mutase-like, Major facilitator superfamily domain	XP_007597245.1		100	25.55	73.64	73.64
gene3292	Cluster1	2.435	2.56828	1.86134	-0.304888	1.63993	1.33133	249962						B9KD77	Phenylalanine--tR ligase alpha subunit (EC 6.1.1.20) (Phenylalanyl-tR synthetase alpha subunit) (PheRS)	pheS Cla_1194	IPR002319, IPR004188, IPR004529, IPR006195, IPR010978, IPR022911	Phenylalanyl-tR synthetase, Phenylalanine-tR ligase, class II, N-terminal, Phenylalanyl-tR synthetase, class IIc, alpha subunit, Aminoacyl-tR synthetase, class II, tR-binding arm, Phenylalanine-tR ligase alpha chain 1, bacterial	cla:Cla_1194	G4NJU1			XP_003721214.1		100	35.29	44.59	44.59
gene10492	Cluster1	1.48933	2.05768	1.18255	1.82961	1.63979	0.110593	74333	GO:0003676	nucleic acid binding	IPR003100, IPR003165, IPR012337	Argonaute and Dicer protein, PAZ, Stem cell self-renewal protein Piwi, Polynucleotidyl transferase, Ribonuclease H fold	PAZ, Piwi, PIWI, Ribonuclease H-like	O77503	Protein argonaute-2 (Argonaute2) (EC 3.1.26.n2) (Argonaute RISC catalytic component 2) (Eukaryotic translation initiation factor 2C 2) (eIF-2C 2) (eIF2C 2) (Protein slicer) (Fragment)	AGO2 EIF2C2	IPR003100, IPR003165, IPR012337, IPR014811, IPR028602, IPR032472, IPR032473, IPR032474	PAZ domain, Piwi domain, Ribonuclease H-like domain, Argonaute, linker 1 domain, Protein argonaute-2, Argonaute linker 2 domain, Protein argonaute, Mid domain, Protein argonaute, N-terminal	ocu:100009457	D0U264	IPR003100, IPR003165, IPR012337, IPR014811, IPR032472	PAZ domain, Piwi domain, Ribonuclease H-like domain, Argonaute, linker 1 domain, Argonaute linker 2 domain	ACY36939.1		94.49	29.07	97.13	97.13
gene10709	Cluster1	1.60815	2.54508	1.23596	1.16276	1.63799	0.302792	74743		unknown_gene		unknown_gene			unknown_gene			unknown_gene				unknown_gene	KCZ78018.1		100		26.73
gene8267	Cluster1	1.36081	2.00011	1.86572	1.29505	1.63042	0.0942997	357113						Q08448	Putative lipase YOR059C (EC 3.1.-.-)	YOR059C YOR29-10	IPR007751, IPR029058	Domain of unknown function DUF676, lipase-like, Alpha/Beta hydrolase fold	sce:YOR059C				WP_024362576.1		81.3	25.69	31
gene1103	Cluster1	1.02481	2.01442	2.33507	1.1302	1.62613	0.315225	354044		unknown_gene		unknown_gene			unknown_gene			unknown_gene				unknown_gene			100
gene3929	Cluster1	1.63633	1.15116	1.04698	2.65983	1.62357	0.407403	60918	GO:0006865, GO:0015171, GO:0016020, GO:0016021, GO:0006810	amino acid transport, amino acid transmembrane transporter activity, membrane, integral to membrane, transport	IPR004841, IPR002293, IPR004840	Amino acid permease-associated region, Amino acid/polyamine transporter I, Amino acid permease, conserved site	AA_permease, Amino acid transporter, AMINO_ACID_PERMEASE_1	P38084	Leu/Val/Ile amino-acid permease (Branched-chain amino-acid permease 2)	BAP2 YBR068C YBR0629	IPR002293, IPR004762, IPR004840, IPR004841	Amino acid/polyamine transporter I, Amino acid permease, fungi, Amino acid permease, conserved site, Amino acid permease/ SLC12A domain	sce:YBR068C	R8B8K9	IPR002293, IPR004840, IPR004841	Amino acid/polyamine transporter I, Amino acid permease, conserved site, Amino acid permease/ SLC12A domain	XP_007919471.1		100	36.36	76.54	76.54
NOV_006345	Cluster1	2.92048	1.57788	1.54376	0.45174	1.62347	0.765906							Q8Y832	Ribitol-5-phosphate cytidylyltransferase (EC 2.7.7.40)	tarI lmo1086	IPR001228;IPR018294;IPR029044;				PF03607;, PF03607;					31.6				isopentenyl diphosphate biosynthetic process, methylerythritol 4-phosphate pathway [GO:0019288]; terpenoid biosynthetic process [GO:0016114]
gene4200	Cluster1	1.01512	2.63976	1.60753	1.22084	1.62081	0.391317	328380		unknown_gene		unknown_gene			unknown_gene			unknown_gene		E7G6		unknown_gene	WP_024739596.1		82.76		30.86	30.86
NOV_004560	Cluster1	2.06588	1.98071	1.24381	1.18465	1.61876	0.164992							Q6XW15	Genome polyprotein [Cleaved into: P1 proteinase (EC 3.4.-.-) (N-terminal protein); Helper component proteinase (HC-pro) (EC 3.4.22.45); Protein P3; 6 kDa protein 1 (6K1); Cytoplasmic inclusion protein (CI) (EC 3.6.4.-); 6 kDa protein 2 (6K2); Viral genome-linked protein (VPg); Nuclear inclusion protein A (NI-a) (NIa) (EC 3.4.22.44) (49 kDa proteinase) (49 kDa-Pro) (NIa-pro); Nuclear inclusion pro…		IPR011545;IPR001456;IPR031159;IPR014001;IPR001650;IPR027417;IPR002540;IPR009003;IPR001592;IPR001730;IPR013648;IPR001205;IPR007094;				PF02753;PF00345;					35.4				R-protein covalent cross-linking [GO:0018144]; transcription, D-templated [GO:0006351]; viral R genome replication [GO:0039694]	DOMAIN 648 770 Peptidase C6. {ECO:0000255|PROSITE-ProRule:PRU01080}.; DOMAIN 1241 1393 Helicase ATP-binding. {ECO:0000255|PROSITE-ProRule:PRU00541}.; DOMAIN 1412 1571 Helicase C-terminal. {ECO:0000255|PROSITE-ProRule:PRU00542}.; DOMAIN 2047 2266 Peptidase C4. {ECO:0000255|PROSITE-ProRule:PRU00766}.; DOMAIN 2535 2659 RdRp catalytic. {ECO:0000255|PROSITE-ProRule:PRU00539}.
gene5409	Cluster1	2.01496	1.27713	2.07794	1.10213	1.61804	0.187859	231609		unknown_gene		unknown_gene			unknown_gene			unknown_gene		G3YCN9		unknown_gene	EHA19571.1		100		36.12	36.12
gene6857	Cluster1	1.23698	1.71102	1.40435	2.11309	1.61636	0.111145	260426	GO:0003700, GO:0005634, GO:0006355, GO:0008270, GO:0003677, GO:0006350	transcription factor activity, nucleus, regulation of transcription, D-dependent, zinc ion binding, D binding, transcription	IPR001138, IPR007219	Fungal transcriptional regulatory protein, N-terminal, Fungal specific transcription factor	Zn_clus, Fungal_trans, no description, ZN2_CY6_FUNGAL_2, ZN2_CY6_FUNGAL_1, Zn2/Cys6 D-binding domain	Q1MTM9	Uncharacterized transcriptional regulatory protein C1327.01c	SPAC1327.01c	IPR001138, IPR002409, IPR007219	Zn(2)-C6 fungal-type D-binding domain, Aflatoxin biosynthesis regulatory protein, Transcription factor domain, fungi	spo:SPAC1327.01c	N1PCH7	IPR001138, IPR007219	Zn(2)-C6 fungal-type D-binding domain, Transcription factor domain, fungi	EME39977.1		100	22.11	49.47	49.47
gene1914	Cluster1	1.93538	0.999392	0.314903	3.20129	1.61274	1.17204	35453	GO:0008152, GO:0016491, GO:0018658	metabolic process, oxidoreductase activity, salicylate 1-monooxygenase activity	IPR003042, IPR006076	Aromatic-ring hydroxylase, FAD dependent oxidoreductase	RNGMNOXGSE, DAO	P23262	Salicylate hydroxylase (EC 1.14.13.1) (Salicylate 1-monooxygenase)	nahG	IPR002938, IPR017631, IPR023753	FAD-binding domain, Salicylate 1-monooxygenase, FAD/D(P)-binding domain	pg:3974216	A0A094HVL3	IPR002938, IPR023753	FAD-binding domain, FAD/D(P)-binding domain	KFZ19465.1		100	29.79	57.55	57.55
gene2353	Cluster1	1.76273	2.2435	1.69198	0.751167	1.61234	0.292236	269668	GO:0004497, GO:0005506, GO:0006118, GO:0020037, GO:0050381	monooxygenase activity, iron ion binding, electron transport, heme binding, unspecific monooxygenase activity	IPR001128, IPR002401	Cytochrome P450, Cytochrome P450, E-class, group I	P450, EP450I, p450, CYTOCHROME_P450, Cytochrome P450	O13317	Isotrichodermin C-15 hydroxylase (EC 1.14.-.-) (Cytochrome P450 65A1)	TRI11 CYP65A1	IPR001128, IPR002401, IPR017972	Cytochrome P450, Cytochrome P450, E-class, group I, Cytochrome P450, conserved site		B2AD03	IPR001128, IPR002401	Cytochrome P450, Cytochrome P450, E-class, group I	KGO42049.1		100	46.3	66.67	64
gene8606	Cluster1	2.32548	1.80711	1.39507	0.919622	1.61182	0.268393	244136			IPR002110	Ankyrin	ANKYRIN, Ank, no description, ANK_REPEAT, ANK_REP_REGION, Ankyrin repeat	Q502M6	Ankyrin repeat domain-containing protein 29	ankrd29 si:dkey-121a11.5 zgc:111996	IPR002110, IPR020683	Ankyrin repeat, Ankyrin repeat-containing domain	dre:553798	B2WC95	IPR002110, IPR020683	Ankyrin repeat, Ankyrin repeat-containing domain	XP_001937936.1		100	43.48	71.74	71.74
gene8070	Cluster1	0.414182	1.63121	2.40105	1.99316	1.6099	0.550752	73785						A2BYK9	D-directed R polymerase subunit beta' (RP subunit beta') (EC 2.7.7.6) (R polymerase subunit beta') (Transcriptase subunit beta')	rpoC2 P9515_16631	IPR007066, IPR007081, IPR007083, IPR012756	R polymerase Rpb1, domain 3, R polymerase Rpb1, domain 5, R polymerase Rpb1, domain 4, D-directed R polymerase, subunit beta''	pmc:P9515_16631	W1IAY3	IPR027417	P-loop containing nucleoside triphosphate hydrolase	CDL70801.1		94.8	33.9	91.76	91.76
gene1397	Cluster1	1.46639	1.54459	2.42332	1.00169	1.609	0.264105	246243			IPR002110	Ankyrin	ANKYRIN, Ank, no description, ANK_REPEAT, ANK_REP_REGION, Ankyrin repeat	Q8NB46	Serine/threonine-protein phosphatase 6 regulatory ankyrin repeat subunit C (PP6-ARS-C) (Serine/threonine-protein phosphatase 6 regulatory subunit ARS-C) (Ankyrin repeat domain-containing protein 52)	ANKRD52	IPR002110, IPR020683	Ankyrin repeat, Ankyrin repeat-containing domain	hsa:283373	S0DRK6	IPR002110, IPR020683	Ankyrin repeat, Ankyrin repeat-containing domain	CCT63193.1		84.06	36.26	51.58	51.58
gene67	Cluster1	1.31653	2.0903	2.19021	0.83414	1.60779	0.313848	325020												M2SU18	IPR008427	Extracellular membrane protein, CFEM domain	XP_007703885.1	XM_012993685.1	100		33.33	33.33	100
gene7445	Cluster1	2.08193	0.916974	1.32999	2.08518	1.60352	0.251759	330510	GO:0005179, GO:0005576	hormone activity, extracellular region	IPR001545, IPR009057	Gonadotropin, beta chain, Homeodomain-like	GLYCO_HORMONE_BETA_1, Homeodomain-like	Q9CMR2	Transcriptional repressor NrdR	nrdR PM0750	IPR003796, IPR005144	Ribonucleotide reductase regulator NrdR-like, ATP-cone domain	pmu:PM0750						100	45.95
gene2262	Cluster1	1.37973	1.74634	1.23637	2.03968	1.60053	0.0988702	334912		unknown_gene		unknown_gene			unknown_gene			unknown_gene		R8BA41		unknown_gene	XP_007919043.1		100		43.54	43.54
gene9456	Cluster1	0.849868	0.578485	1.80377	3.15284	1.59624	1.01474	333209												V2WQX3	IPR006710, IPR023296	Glycoside hydrolase, family 43, Glycosyl hydrolase, five-bladed beta-propellor domain	XP_007856702.1		100		61.54	61.54
NOV_002282	Cluster1	2.66064	1.15464	0.569757	1.98802	1.59327	0.63377							O29658, A0A095A4B0	UPF0175 protein AF_0597, BRO1 domain-containing protein BROX	AF_0597, MS3_10780	IPR005368;, IPR004328;				PF02786;PF02787;PF02142;, PF03813;					30, 40				,	, DOMAIN 48 255 BRO1. {ECO:0000259|PROSITE:PS51180}.
gene2064	Cluster1	0.942292	1.48939	1.08425	2.82109	1.58426	0.550222	75694						C6DCX5	Glutamate 5-kinase (EC 2.7.2.11) (Gamma-glutamyl kinase) (GK)	proB PC1_3284	IPR001048, IPR001057, IPR002478, IPR005715, IPR011529, IPR015947, IPR019797	Aspartate/glutamate/uridylate kinase, Glutamate/acetylglutamate kinase, PUA domain, Glutamate 5-kinase/delta-1-pyrroline-5-carboxylate synthase, Glutamate 5-kinase, PUA-like domain, Glutamate 5-kinase, conserved site	pct:PC1_3284						100	48.57
gene8711	Cluster1	0.648585	2.04368	1.40454	2.23779	1.58365	0.38649	352321	GO:0003824, GO:0005488, GO:0008152	catalytic activity, binding, metabolic process	IPR013149, IPR013154, IPR011032, IPR016040	Alcohol dehydrogenase, zinc-binding, Alcohol dehydrogenase GroES-like, GroES-like, D(P)-binding	ADH_zinc_N, ADH_N, GroES-like, D(P)-binding Rossmann-fold domains	Q28452	Quinone oxidoreductase (EC 1.6.5.5) (DPH:quinone reductase) (Zeta-crystallin)	CRYZ	IPR002085, IPR002364, IPR011032, IPR013149, IPR013154, IPR016040	Alcohol dehydrogenase superfamily, zinc-type, Quinone oxidoreductase/zeta-crystallin, conserved site, GroES-like, Alcohol dehydrogenase, C-terminal, Alcohol dehydrogenase, N-terminal, D(P)-binding domain		G2QUX8	IPR002085, IPR011032, IPR013149, IPR013154, IPR016040	Alcohol dehydrogenase superfamily, zinc-type, GroES-like, Alcohol dehydrogenase, C-terminal, Alcohol dehydrogenase, N-terminal, D(P)-binding domain	XP_003650109.1		92.27	34.56	44.41	44.41
gene9169	Cluster1	1.5378	1.22703	1.498	2.05895	1.58045	0.0906227	264894	GO:0005634	nucleus	IPR001214, IPR013105, IPR013026	SET, Tetratricopeptide TPR2, Tetratricopeptide region	SET, TPR_2, no description, TPR, TPR_REGION	O74467	SET domain-containing protein 5 (EC 2.1.1.43)	set5 SPCC1739.05	IPR001214	SET domain	spo:SPCC1739.05	R8B9R9	IPR001214, IPR011990	SET domain, Tetratricopeptide-like helical domain	XP_007919213.1		100	29.53	60.43	60.43
gene8288	Cluster1	2.14686	0.774575	0.69465	2.70419	1.58007	0.754422	262487						P36872	Protein phosphatase PP2A 55 kDa regulatory subunit (PR55) (Protein phosphatase PP2A regulatory subunit B) (Protein twins)	tws aar Pp2A-85F CG6235	IPR000009, IPR001680, IPR015943, IPR017986, IPR018067	Protein phosphatase 2A regulatory subunit PR55, WD40 repeat, WD40/YVTN repeat-like-containing domain, WD40-repeat-containing domain, Protein phosphatase 2A regulatory subunit PR55, conserved site	dme:Dmel_CG6235	A0A010R269	IPR000504, IPR012677	R recognition motif domain, Nucleotide-binding alpha-beta plait domain	XP_007601988.1		86.6	31.08	35.86	35.86
gene4739	Cluster1	1.20534	2.04231	1.81272	1.23613	1.57413	0.131593	253221		unknown_gene		unknown_gene			unknown_gene			unknown_gene		K1X3G0		unknown_gene	XP_007294343.1		100		74.07	74.07
gene7289	Cluster1	0.553614	2.07757	2.5468	1.11228	1.57257	0.613576	234877						Q07113	Cation-independent mannose-6-phosphate receptor (CI Man-6-P receptor) (CI-MPR) (M6PR) (300 kDa mannose 6-phosphate receptor) (MPR 300) (Insulin-like growth factor 2 receptor) (Insulin-like growth factor II receptor) (IGF-II receptor) (M6P/IGF2 receptor) (M6P/IGF2R) (CD antigen CD222)	Igf2r	IPR000479, IPR000562, IPR009011, IPR013806	Cation-independent mannose-6-phosphate receptor, Fibronectin, type II, collagen-binding, Mannose-6-phosphate receptor binding domain, Kringle-like fold	mmu:16004	A0A024S4Y3			XP_006967437.1	XM_008027209.1	71.71	41.94	50.36	50.36	86.42
gene6740	Cluster1	0.385863	2.35761	2.56272	0.98191	1.57202	0.838458	228886												R8BW07	IPR019236	Domain of unknown function DUF2183	XP_007911634.1	XM_001793735.1	88.72		63.09	63.09	75.14
gene3217	Cluster1	0.902037	2.3046	1.18152	1.87789	1.56651	0.30787	287505	GO:0009116, GO:0016740, GO:0016491, GO:0050660, GO:0003824	nucleoside metabolic process, transferase activity, oxidoreductase activity, FAD binding, catalytic activity	IPR000836, IPR006094, IPR002375, IPR016166	Phosphoribosyltransferase, FAD linked oxidase, N-terminal, Purine/pyrimidine phosphoribosyl transferase, conserved site, FAD-binding, type 2	Pribosyltran, FAD_binding_4, PUR_PYR_PR_TRANSFER, FAD-binding domain	P47952	Adenine phosphoribosyltransferase (APRT) (EC 2.4.2.7)	APRT	IPR000836, IPR005764, IPR029057	Phosphoribosyltransferase domain, Adenine phosphoribosyl transferase, Phosphoribosyltransferase-like	cge:100765665	V9DFI1	IPR000836, IPR005919, IPR006094, IPR016166, IPR016167, IPR029057	Phosphoribosyltransferase domain, Higher eukaryotic phosphomevalonate kinase, FAD linked oxidase, N-terminal, FAD-binding, type 2, FAD-binding, type 2, subdomain 1, Phosphoribosyltransferase-like	XP_008726663.1	XM_009219321.1	100	34.66	66.75	66.75	75.06
gene11133	Cluster1	2.90061	2.18669	1.16842	0	1.56393	1.19422	334646	GO:0005525, GO:0007264, GO:0005622, GO:0015031	GTP binding, small GTPase mediated signal transduction, intracellular, protein transport	IPR001806, IPR013684, IPR003577, IPR003579	Ras GTPase, Miro-like, Ras small GTPase, Ras type, Ras small GTPase, Rab type	RASTRNSFRMNG, Miro, no description	Q9C5J9	Uncharacterized GTP-binding protein At5g64813	At5g64813 MXK3.3	IPR001806, IPR025662, IPR027417	Small GTPase superfamily, Sigma-54 interaction domain, ATP-binding site 1, P-loop containing nucleoside triphosphate hydrolase	ath:AT5G64813	A0A084FU71	IPR001806, IPR003579, IPR020849, IPR027417	Small GTPase superfamily, Small GTPase superfamily, Rab type, Small GTPase superfamily, Ras type, P-loop containing nucleoside triphosphate hydrolase	KEZ38633.1		89.49	44.12	31.67	31.67
gene9292	Cluster1	1.08863	1.23517	2.62225	1.30389	1.56248	0.38041	72519						O33289	Amino-acid acetyltransferase (EC 2.3.1.1) (N-acetylglutamate synthase) (AGS) (GS)	argA Rv2747	IPR000182, IPR016181	GT domain, Acyl-CoA N-acyltransferase	mtu:Rv2747	F5TG51			WP_007390779.1		100	34.33	31.18	31.18
gene1746	Cluster1	1.00851	1.3138	2.12256	1.80114	1.56151	0.184843	336410	GO:0005215, GO:0006810, GO:0016021	transporter activity, transport, integral to membrane	IPR011701, IPR007114, IPR016196	Major facilitator superfamily MFS-1, Major facilitator superfamily, MFS general substrate transporter	MFS_1, MFS, MFS general substrate transporter	O43081	Uncharacterized MFS-type transporter C947.06c	SPBC947.06c	IPR011701, IPR020846	Major facilitator superfamily, Major facilitator superfamily domain	spo:SPBC947.06c	E4ZH65	IPR011701, IPR020846	Major facilitator superfamily, Major facilitator superfamily domain	XP_003834000.1	XM_001273629.1	100	31.31	74.5	74.5	73.8
gene5450	Cluster1	1.11345	2.23892	1.51442	1.36698	1.55844	0.174918	321901		unknown_gene		unknown_gene			unknown_gene			unknown_gene				unknown_gene			100
gene9425	Cluster1	1.06608	1.71878	2.17341	1.26687	1.55629	0.182828	72782	GO:0004672, GO:0005524, GO:0006468, GO:0004674	protein kinase activity, ATP binding, protein amino acid phosphorylation, protein serine/threonine kinase activity	IPR002290, IPR000719, IPR011009	Serine/threonine protein kinase, Protein kinase, core, Protein kinase-like	no description, PROTEIN_KISE_DOM, Protein kinase-like (PK-like)	Q8WHX1	Protein TIC 214 (Translocon at the inner envelope membrane of chloroplasts 214) (AtTIC214)	TIC214 ycf1	IPR008896	Uncharacterised protein family Ycf1		F0XIA9	IPR000719, IPR011009	Protein kinase domain, Protein kinase-like domain	EFX03165.1		100	43.24	33.64	33.64
gene10931	Cluster1	2.00931	1.09655	1.1255	1.99239	1.55594	0.198089	267340	GO:0008152, GO:0016491, GO:0003824, GO:0005488	metabolic process, oxidoreductase activity, catalytic activity, binding	IPR002347, IPR002198, IPR016040	Glucose/ribitol dehydrogenase, Short-chain dehydrogenase/reductase SDR, D(P)-binding	GDHRDH, adh_short, D(P)-binding Rossmann-fold domains	O74959	Uncharacterized oxidoreductase C736.13 (EC 1.-.-.-)	SPCC736.13	IPR002198, IPR002347, IPR016040	Short-chain dehydrogenase/reductase SDR, Glucose/ribitol dehydrogenase, D(P)-binding domain	spo:SPCC736.13	G9N4J2	IPR002198, IPR002347, IPR016040	Short-chain dehydrogenase/reductase SDR, Glucose/ribitol dehydrogenase, D(P)-binding domain	EHK18517.1	XM_007915705.1	100	38.32	61.11	61.11	77.7
gene4906	Cluster1	1.44769	1.83549	0.727354	2.20852	1.55476	0.300569	288120	GO:0003824, GO:0018820	catalytic activity, cyanamide hydratase activity	IPR006674, IPR003607, IPR017771	Metal-dependent phosphohydrolase, HD region, subdomain, Metal-dependent phosphohydrolase, HD region, Cyanamide hydratase, HD-type	HD, no description, cyanamide_fam: HD domain protein, cyana	P22143	Cyanamide hydratase (EC 4.2.1.69) (Urea hydro-lyase)	CAH	IPR003607, IPR006674, IPR017771	HD/PDEase domain, HD domain, Cyanamide hydratase		U7PPD7	IPR003607, IPR006674, IPR017771	HD/PDEase domain, HD domain, Cyanamide hydratase	ERS97432.1		90.11	40.29	62.88	62.88
gene11174	Cluster1	1.2705	1.71762	0.732862	2.49644	1.55436	0.417401	99498	GO:0003824, GO:0005488, GO:0008152, GO:0003960	catalytic activity, binding, metabolic process, DPH:quinone reductase activity	IPR013149, IPR013154, IPR014189, IPR011032, IPR016040	Alcohol dehydrogenase, zinc-binding, Alcohol dehydrogenase GroES-like, Quinone oxidoreductase putative, PIG3, GroES-like, D(P)-binding	ADH_zinc_N, ADH_N, quinone_pig3: putative D(P)H quinone o, GroES-like, D(P)-binding Rossmann-fold domains	Q53FA7	Quinone oxidoreductase PIG3 (EC 1.-.-.-) (Tumor protein p53-inducible protein 3) (p53-induced gene 3 protein)	TP53I3 PIG3	IPR002085, IPR011032, IPR013149, IPR013154, IPR014189, IPR016040	Alcohol dehydrogenase superfamily, zinc-type, GroES-like, Alcohol dehydrogenase, C-terminal, Alcohol dehydrogenase, N-terminal, Quinone oxidoreductase PIG3, D(P)-binding domain	hsa:9540	L7HYU8	IPR002085, IPR011032, IPR013149, IPR013154, IPR014189, IPR016040	Alcohol dehydrogenase superfamily, zinc-type, GroES-like, Alcohol dehydrogenase, C-terminal, Alcohol dehydrogenase, N-terminal, Quinone oxidoreductase PIG3, D(P)-binding domain	XP_003718262.1	XM_007811974.1	99.7	40.31	63.95	63.95	71.81
NOV_004540	Cluster1	0.470008	2.21766	1.11591	2.41072	1.55357	0.635344							Q1MRQ2	Crossover junction endodeoxyribonuclease RuvC (EC 3.1.22.4) (Holliday junction nuclease RuvC) (Holliday junction resolvase RuvC)	ruvC LI0268	IPR012337;IPR002176;				PF01029;					31.6				D recombination [GO:0006310]; D repair [GO:0006281]
gene8520	Cluster1	0.407942	2.4614	1.45187	1.88816	1.55234	0.564728	356900	GO:0016787	hydrolase activity	IPR001279	Beta-lactamase-like	Lactamase_B	Q1LZ83	Beta-lactamase-like protein 2 (EC 3.-.-.-)	LACTB2	IPR001279	Metallo-beta-lactamase	bta:535021	A0A067XMV3	IPR001279	Metallo-beta-lactamase	XP_007837597.1		100	41.26	84.73	84.73
NOV_006421	Cluster1	2.35758	1.11656	1.24716	1.48801	1.55233	0.233897							Q3AH50, A0A023PZ72	Ribosome-binding factor A, Uncharacterized protein	rbfA Syncc9605_2350,	IPR015946;IPR000238;IPR023799;IPR020053;,				PF00089;					33.1, 39.7				rR processing [GO:0006364],	,
gene3499	Cluster1	1.21698	1.17263	2.40909	1.40121	1.54998	0.253372	327098		unknown_gene		unknown_gene			unknown_gene			unknown_gene		C7YLU7		unknown_gene	XP_003052550.1		100		77.08	77.08
gene9994	Cluster1	1.05174	2.01593	2.37695	0.74494	1.54739	0.449326	266803	GO:0016491, GO:0050660, GO:0005882, GO:0003954	oxidoreductase activity, FAD binding, intermediate filament, DH dehydrogenase activity	IPR013027, IPR001327, IPR006821	FAD-dependent pyridine nucleotide-disulphide oxidoreductase, Pyridine nucleotide-disulphide oxidoreductase, D-binding region, Intermediate filament, D-binding region	FADPNR, Pyr_redox, Filament_head, Pyr_redox_2	Q1JPL4	External alternative D(P)H-ubiquinone oxidoreductase B1, mitochondrial (EC 1.6.5.9) (External alternative DH dehydrogenase NDB1) (DH:ubiquinone reductase (non-electrogenic) NDB1)	NDB1 At4g28220 F26K10.100	IPR000103, IPR002048, IPR011992, IPR018247, IPR023753	Pyridine nucleotide-disulphide oxidoreductase, class-II, EF-hand domain, EF-hand domain pair, EF-Hand 1, calcium-binding site, FAD/D(P)-binding domain	ath:AT4G28220	M3APF1	IPR023753	FAD/D(P)-binding domain	XP_007923737.1		99.62	39.82	64.29	64.29
NOV_003858	Cluster1	2.07887	2.02717	1.74545	0.335306	1.5467	0.50526							Q5VWM5, G4MQ16	PRAME family member 9/15, Uncharacterized protein	PRAMEF9; PRAMEF15, MGG_16076 MGG_17019	IPR032675;IPR026271;,				PF02130;, PF00665;PF07727;					36.2, 75.1				negative regulation of apoptotic process [GO:0043066]; negative regulation of cell differentiation [GO:0045596]; negative regulation of retinoic acid receptor signaling pathway [GO:0048387]; negative regulation of transcription, D-templated [GO:0045892]; positive regulation of cell proliferation [GO:0008284],	,
gene10743	Cluster1	1.05513	1.35185	1.16842	2.55211	1.53188	0.358169	265643						P77748	Uncharacterized protein YdiJ	ydiJ b1687 JW1677	IPR004113, IPR006094, IPR009051, IPR016164, IPR016166, IPR016167, IPR016169, IPR017896, IPR017900	FAD-linked oxidase, C-terminal, FAD linked oxidase, N-terminal, Alpha-helical ferredoxin, FAD-linked oxidase-like, C-terminal, FAD-binding, type 2, FAD-binding, type 2, subdomain 1, CO dehydrogenase flavoprotein-like, FAD-binding, subdomain 2, 4Fe-4S ferredoxin-type, iron-sulphur binding domain, 4Fe-4S ferredoxin, iron-sulphur binding, conserved site	eco:b1687, ecj:JW1677	R8BCW3	IPR006913, IPR011057	Glutathione-dependent formaldehyde-activating enzyme/centromere protein V, Mss4-like	XP_007918092.1	XM_008096735.1	100	31.33	73.8	73.8	75.68
gene4814	Cluster1	1.56375	0.647382	2.29529	1.61497	1.53035	0.34326	355422		unknown_gene		unknown_gene			unknown_gene			unknown_gene				unknown_gene		XM_001605989.3	100				91.3
gene2722	Cluster1	2.88842	2.48339	1.16301	-0.414732	1.53002	1.66773	249688						Q5WT84	50S ribosomal protein L35	rpmI lpl2641	IPR001706, IPR018265, IPR021137	Ribosomal protein L35, non-mitochondrial, Ribosomal protein L35, conserved site, Ribosomal protein L35	lpf:lpl2641	G2QEI9			XP_003659974.1		88.7	40	39.42	39.42
NOV_009666	Cluster1	0.731463	2.11528	1.96366	1.30546	1.52897	0.304672							A8F4E1	Phosphopantetheine adenylyltransferase (EC 2.7.7.3) (Dephospho-CoA pyrophosphorylase) (Pantetheine-phosphate adenylyltransferase) (PPAT)	coaD Tlet_0458	IPR004821;IPR001980;IPR014729;				PF00179;					31.2				coenzyme A biosynthetic process [GO:0015937]
gene10706	Cluster1	1.0395	2.09803	1.48494	1.48064	1.52578	0.141911	104323						P26445	Lymphotoxin-alpha (LT-alpha) (TNF-beta) (Tumor necrosis factor ligand superfamily member 1)	LTA TNFB TNFSF1	IPR002960, IPR006052, IPR006053, IPR008983, IPR021184	Lymphotoxin-alpha, Tumour necrosis factor domain, Tumour necrosis factor, Tumour necrosis factor-like domain, Tumour necrosis factor, conserved site	ssc:407742	A0A094B9D2	IPR010730	Heterokaryon incompatibility	KFY06922.1		100	28	78.72	78.72
gene3410	Cluster1	1.32364	0.916974	2.47041	1.39047	1.52537	0.330535	336936			IPR002110, IPR007111	Ankyrin, CHT nucleoside triphosphatase	ANKYRIN, Ank, no description, ANK_REP_REGION, CHT, Ankyrin repeat	O75179	Ankyrin repeat domain-containing protein 17 (Gene trap ankyrin repeat protein) (Serologically defined breast cancer antigen NY-BR-16)	ANKRD17 GTAR KIAA0697	IPR002110, IPR004087, IPR004088, IPR020683	Ankyrin repeat, K Homology domain, K Homology domain, type 1, Ankyrin repeat-containing domain	hsa:26057	L2GK67	IPR000845, IPR018017, IPR027417	Nucleoside phosphorylase domain, Nucleoside phosphorylase, P-loop containing nucleoside triphosphate hydrolase	XP_007272509.1	XM_007272447.1	100	38.55	97.85	97.85	95.17
gene7552	Cluster1	1.16524	2.05291	1.71858	1.16281	1.52488	0.144191	62434	GO:0004620, GO:0009395, GO:0008152, GO:0004622	phospholipase activity, phospholipid catabolic process, metabolic process, lysophospholipase activity	IPR002642, IPR016035	Lysophospholipase, catalytic region, Acyl transferase/acyl hydrolase/lysophospholipase	PLA2_B, no description, PLA2C, FabD/lysophospholipase-like	O42790	Lysophospholipase (EC 3.1.1.5) (Phospholipase B)	lpl 5C2.110 NCU03141	IPR002642, IPR016035	Lysophospholipase, catalytic domain, Acyl transferase/acyl hydrolase/lysophospholipase	ncr:NCU03141	F8N4D5	IPR002642, IPR016035	Lysophospholipase, catalytic domain, Acyl transferase/acyl hydrolase/lysophospholipase	XP_009856316.1	XM_007277383.1	100	67.69	67.25	67.25	79.89
gene4121	Cluster1	2.70623	0.653541	1.14747	1.58931	1.52414	0.575351	55134						A8F3A3	Methylthioribose-1-phosphate isomerase 1 (M1Pi 1) (MTR-1-P isomerase 1) (EC 5.3.1.23) (S-methyl-5-thioribose-1-phosphate isomerase 1)	mtnA1 Tlet_0065	IPR000649, IPR005251, IPR011559, IPR027363	Initiation factor 2B-related, Methylthioribose-1-phosphate isomerase, Initiation factor 2B alpha/beta/delta, Methylthioribose-1-phosphate isomerase-like, N-terminal domain	tle:Tlet_0065	J9NPN3			EWY79844.1		100	29.27	45.1	30.77
gene10813	Cluster1	1.53942	1.43384	2.41886	0.702882	1.52375	0.370843	353363			IPR011118	Tannase and feruloyl esterase	Tannase	P78581	Tannase (EC 3.1.1.20) [Cleaved into: Tannase 33 kDa subunit; Tannase 30 kDa subunit]	AO090103000074	IPR011118, IPR029058	Tannase/feruloyl esterase, Alpha/Beta hydrolase fold	aor:AOR_1_142034	A2R274	IPR011118, IPR029058	Tannase/feruloyl esterase, Alpha/Beta hydrolase fold	XP_001396513.1		100	50.92	76.9	76.9
gene1773	Cluster1	1.08423	2.03972	1.68024	1.28855	1.52319	0.134802	245147						Q9M086	DDB1- and CUL4-associated factor homolog 1 (Protein DDB1-CUL4 ASSOCIATED FACTOR 1) (Protein DCAF1)	DCAF1 At4g31160 F6E21_80	IPR001680, IPR006594, IPR015943, IPR017986	WD40 repeat, LIS1 homology motif, WD40/YVTN repeat-like-containing domain, WD40-repeat-containing domain	ath:AT4G31160	R8BDL3			XP_007917670.1		95.31	68.42	59.02	59.02
gene4000	Cluster1	1.98774	2.44432	0.710095	0.937848	1.52	0.517001	345209	GO:0005351, GO:0008643, GO:0016020, GO:0005215, GO:0006810, GO:0016021, GO:0008733	sugar:hydrogen symporter activity, carbohydrate transport, membrane, transporter activity, transport, integral to membrane, L-arabinose isomerase activity	IPR003663, IPR005828, IPR007114, IPR005829, IPR016196	Sugar transporter, General substrate transporter, Major facilitator superfamily, Sugar transporter, conserved site, MFS general substrate transporter	SUGRTRNSPORT, Sugar_tr, SP: MFS transporter, sugar porter (SP) famil, MFS, SUGAR_TRANSPORT_1, SUGAR_TRANSPORT_2, MFS general substrate transporter	Q92253	Probable glucose transporter rco-3	rco-3 B5K2.040 NCU02582	IPR003663, IPR005828, IPR005829, IPR020846	Sugar/inositol transporter, Major facilitator, sugar transporter-like, Sugar transporter, conserved site, Major facilitator superfamily domain	ncr:NCU02582	F9G0U8	IPR003663, IPR005828, IPR005829, IPR020846	Sugar/inositol transporter, Major facilitator, sugar transporter-like, Sugar transporter, conserved site, Major facilitator superfamily domain	EGU77203.1	XM_003664884.1	100	39.09	76.19	76.19	78.81
gene2215	Cluster1	0.384666	1.64018	1.35879	2.69421	1.51946	0.677047	231146												R8BDR6	IPR006813	Glycosyl transferase, family 17	XP_007917639.1		87.5		42.55	42.55
NOV_002798	Cluster1	0.645551	2.4145	0.691868	2.32208	1.5185	0.723477							Q1GAR5, A0P1Y4	UPF0356 protein Ldb0761, Transcriptional regulator, ROK family protein	Ldb0761, SIAM614_30061	IPR009907;, IPR000600;IPR011991;				PF03129;, PF00112;					32.3, 37.4				,	,
gene9985	Cluster1	1.60742	1.84061	3.334	-0.723169	1.51472	2.10818	265800	GO:0006118, GO:0016491	electron transport, oxidoreductase activity	IPR003819, IPR007817	Taurine catabolism dioxygenase TauD/TfdA, Pyoverdine biosynthesis	TauD, DIT1_PvcA	P21623	Spore wall maturation protein DIT1	DIT1 YDR403W D9509.21	IPR007817	Pyoverdine biosynthesis	sce:YDR403W	A0A010RSH4	IPR003819, IPR007817	TauD/TfdA-like domain, Pyoverdine biosynthesis	XP_007592880.1		100	48.39	67.53	67.53
NOV_012758	Cluster1	1.47845	1.53715	2.03317	0.993487	1.51056	0.135555							Q3SVA1	Chemotaxis response regulator protein-glutamate methylesterase (EC 3.1.1.61)	cheB Nwi_0523	IPR011006;IPR008248;IPR000673;IPR001789;				PF00213;					33.1				chemotaxis [GO:0006935]	DOMAIN 22 140 Response regulatory. {ECO:0000255|PROSITE-ProRule:PRU00169}.; DOMAIN 221 423 CheB-type methylesterase. {ECO:0000255|HAMAP-Rule:MF_00099}.
NOV_009422	Cluster1	1.6701	2.50598	0.498393	1.35187	1.50659	0.516481							W5Y638	Uncharacterized protein	B843_02785	IPR021385;				unknown_gene					38.5
NOV_009414	Cluster1	1.2221	2.21039	1.36834	1.21156	1.5031	0.170596							Q6EQX3	Protein MEI2-like 5 (OML5) (MEI2-like protein 5)	ML5 Os02g0319100 LOC_Os02g21430 OSJNBa0086N11.15	IPR012677;IPR007201;IPR000504;				PF02575;					32					DOMAIN 193 266 RRM 1. {ECO:0000255|PROSITE-ProRule:PRU00176}.; DOMAIN 278 351 RRM 2. {ECO:0000255|PROSITE-ProRule:PRU00176}.
gene458	Cluster1	1.43131	1.51736	0.950102	2.10663	1.50135	0.16885	59332	GO:0006801, GO:0046872, GO:0030001, GO:0016835, GO:0016837, GO:0016838	superoxide metabolic process, metal ion binding, metal ion transport, carbon-oxygen lyase activity, carbon-oxygen lyase activity, acting on polysaccharides, carbon-oxygen lyase activity, acting on phosphates	IPR001424, IPR006121	Superoxide dismutase, copper/zinc binding, Heavy metal transport/detoxification protein	Sod_Cu, HMA, HMA_2, Cu,Zn superoxide dismutase-like, HMA, heavy metal-associated domain	P40202	Superoxide dismutase 1 copper chaperone	CCS1 LYS7 YMR038C YM9532.03C	IPR001424, IPR006121, IPR024134, IPR024142	Superoxide dismutase, copper/zinc binding domain, Heavy metal-associated domain, HMA, Superoxide dismutase (Cu/Zn) / superoxide dismutase copper chaperone, Superoxide dismutase 1 copper chaperone	sce:YMR038C	G9MVR2	IPR001424, IPR006121, IPR024134, IPR024142	Superoxide dismutase, copper/zinc binding domain, Heavy metal-associated domain, HMA, Superoxide dismutase (Cu/Zn) / superoxide dismutase copper chaperone, Superoxide dismutase 1 copper chaperone	EHK21387.1	XM_958019.3	100	40.53	77.27	77.27	90.44
NOV_011062	Cluster1	1.50802	1.02627	1.39338	2.07146	1.49978	0.140603							C5G0E3, W9XSN9	Sulfite efflux pump SSU1, Uncharacterized protein	SSU1 MCYG_08415, A1O1_07195	IPR004695;, IPR004695;									307, 613				transmembrane transport [GO:0055085], transmembrane transport [GO:0055085]	,
NOV_009449	Cluster1	1.375	2.28459	1.26756	1.06761	1.49869	0.218049							Q7Z7M0	Multiple epidermal growth factor-like domains protein 8 (Multiple EGF-like domains protein 8) (Epidermal growth factor-like protein 4) (EGF-like protein 4)	MEGF8 C19orf49 EGFL4 KIAA0817	IPR000859;IPR001881;IPR013032;IPR000742;IPR000152;IPR018097;IPR024731;IPR015915;IPR002049;IPR016201;IPR002165;				PF01975;, PF00135;					32.7				BMP signaling pathway [GO:0030509]; cell migration involved in gastrulation [GO:0042074]; coronary vasculature development [GO:0060976]; craniofacial suture morphogenesis [GO:0097094]; determination of digestive tract left/right asymmetry [GO:0071907]; determination of heart left/right asymmetry [GO:0061371]; embryonic heart tube left/right pattern formation [GO:0060971]; embryonic heart tube mor…	DOMAIN 30 140 CUB 1. {ECO:0000255|PROSITE-ProRule:PRU00059}.; DOMAIN 138 168 EGF-like 1. {ECO:0000255|PROSITE-ProRule:PRU00076}.; DOMAIN 170 203 EGF-like 2. {ECO:0000255|PROSITE-ProRule:PRU00076}.; DOMAIN 561 613 PSI 1.; DOMAIN 847 899 PSI 2.; DOMAIN 900 947 PSI 3.; DOMAIN 1074 1115 EGF-like 3; calcium-binding. {ECO:0000255|PROSITE-ProRule:PRU00076}.; DOMAIN 1163 1210 Laminin EGF-like 1. {ECO:000…
gene9716	Cluster1	1.58803	2.01327	1.19146	1.1861	1.49471	0.116204	341679						Q59727	4,5-dihydroxyphthalate decarboxylase (DHP decarboxylase) (EC 4.1.1.55)	phtD	IPR015168	SsuA/THI5-like		W9XSY2			XP_007727629.1		90.93	32.05	54.22	54.22
gene6785	Cluster1	0.93652	2.17071	0.727204	2.14286	1.49432	0.444428	277550	GO:0005215, GO:0006810, GO:0016021	transporter activity, transport, integral to membrane	IPR011701, IPR007114, IPR016196	Major facilitator superfamily MFS-1, Major facilitator superfamily, MFS general substrate transporter	MFS_1, MFS, MFS general substrate transporter	O43000	Pantothenate transporter liz1	liz1 SPBC2G2.01c SPBC4B4.13c	IPR011701, IPR020846	Major facilitator superfamily, Major facilitator superfamily domain	spo:SPBC2G2.01c	E3RLD3	IPR011701, IPR020846	Major facilitator superfamily, Major facilitator superfamily domain	XP_003298438.1		100	43.33	58.93	58.93
gene8055	Cluster1	0.683545	2.23795	2.01003	0.997324	1.48221	0.430678	84036	GO:0000166, GO:0004815, GO:0005524, GO:0005737, GO:0006412, GO:0006422, GO:0004812, GO:0006418, GO:0003676	nucleotide binding, aspartate-tR ligase activity, ATP binding, cytoplasm, translation, aspartyl-tR aminoacylation, aminoacyl-tR ligase activity, tR aminoacylation for protein translation, nucleic acid binding	IPR002312, IPR004364, IPR004365, IPR004523, IPR006195, IPR016027	Aspartyl-tR synthetase, class IIb, Aminoacyl-tR synthetase, class II (D, K and N), Nucleic acid binding, OB-fold, tR/helicase-type, Aspartyl-tR synthetase, class IIb, archea/euk type, Aminoacyl-tR synthetase, class II, Nucleic acid-binding, OB-fold-like	TRSYNTHASP, tR-synt_2, tR_anti, aspS_arch: aspartyl-tR synthetase, AA_TR_LIGASE_II, Nucleic acid-binding proteins	Q3SYZ4	Aspartate--tR ligase, cytoplasmic (EC 6.1.1.12) (Aspartyl-tR synthetase) (AspRS)	DARS	IPR002312, IPR004364, IPR004365, IPR004523, IPR006195, IPR012340, IPR018150	Aspartyl/Asparaginyl-tR synthetase, class IIb, Aminoacyl-tR synthetase, class II (D/K/N), OB-fold nucleic acid binding domain, AA-tR synthetase-type, Aspartyl-tR synthetase, archaeal-type, Aminoacyl-tR synthetase, class II, Nucleic acid-binding, OB-fold, Aminoacyl-tR synthetase, class II (D/K/N)-like	bta:510162	A0A066XEY1	IPR002312, IPR004364, IPR004365, IPR004523, IPR006195, IPR012340, IPR018150, IPR024320	Aspartyl/Asparaginyl-tR synthetase, class IIb, Aminoacyl-tR synthetase, class II (D/K/N), OB-fold nucleic acid binding domain, AA-tR synthetase-type, Aspartyl-tR synthetase, archaeal-type, Aminoacyl-tR synthetase, class II, Nucleic acid-binding, OB-fold, Aminoacyl-tR synthetase, class II (D/K/N)-like, Lysylphosphatidylglycerol synthetase, domain of unknown function DUF2156	KDN67512.1	XM_006965914.1	99.56	50	69.74	69.74	73.01
NOV_000473	Cluster1	2.1041	1.54908	1.27041	1.00104	1.48116	0.166901							P83040	Hemocyanin type 2 unit e (RtH2-e)		IPR028999;IPR002227;IPR008922;				PF14295;					40.8
NOV_006774	Cluster1	0.701477	1.94409	2.2516	1.02098	1.47954	0.406887							P08634	Nodulation protein N	nodN	IPR029069;IPR002539;				PF00254;PF05698;PF05697;					33.1				nodulation [GO:0009877]	DOMAIN 9 133 MaoC-like.
gene2517	Cluster1	0.983645	2.308	1.10808	1.51466	1.4786	0.267867	297234						P34231	Uncharacterized protein YKL187C	YKL187C	IPR009571, IPR011989, IPR016024	Membrane protein SUR7/Rim9-like, fungi, Armadillo-like helical, Armadillo-type fold	sce:YKL187C	L2FXX1	IPR009571	Membrane protein SUR7/Rim9-like, fungi	XP_007279770.1		100	26.95	42.51	42.51
NOV_004181	Cluster1	2.07687	1.87226	0.734498	1.2263	1.47748	0.282557							Q9GLK4, D5H7E8	Natriuretic peptides B (Gamma-brain natriuretic peptide) [Cleaved into: Brain natriuretic peptide 32 (BNP-32)], Glycogen operon protein GlgX homolog (EC 3.2.1.-)	NPPB BNP, glgX SRM_01032	IPR000663;IPR030480;IPR002408;, IPR015902;IPR006047;IPR004193;IPR013780;IPR013781;IPR011837;IPR017853;IPR013783;IPR014756;				unknown_gene					33.1, 40.4				cGMP biosynthetic process [GO:0006182]; receptor guanylyl cyclase signaling pathway [GO:0007168]; regulation of blood vessel size [GO:0050880], glycogen catabolic process [GO:0005980]	, DOMAIN 194 628 Aamy. {ECO:0000259|SMART:SM00642}.
gene10172	Cluster1	1.80278	2.21121	0.7437	1.13384	1.47288	0.325152	333631		unknown_gene		unknown_gene			unknown_gene			unknown_gene		L7I0V7		unknown_gene	XP_003715971.1		95.98		41.55	41.55
NOV_002622	Cluster1	1.28155	1.40758	0.76091	2.42135	1.46784	0.361816							A0A028VMK8	Deleted.						unknown_gene					35
gene9340	Cluster1	0.986759	2.10774	0.635506	2.1109	1.46023	0.436748	357532						Q82XS4	2,3-bisphosphoglycerate-dependent phosphoglycerate mutase 1 (BPG-dependent PGAM 1) (PGAM 1) (Phosphoglyceromutase 1) (dPGM 1) (EC 5.4.2.11)	gpmA1 NE0178	IPR001345, IPR005952, IPR013078, IPR029033	Phosphoglycerate/bisphosphoglycerate mutase, active site, Phosphoglycerate mutase 1, Histidine phosphatase superfamily, clade-1, Histidine phosphatase superfamily	neu:NE0178	W3WT11			XP_007839682.1		100	39.53	45.39	45.39
gene10866	Cluster1	1.27341	2.05734	1.13697	1.37046	1.45954	0.125999	47319	GO:0008152, GO:0016787, GO:0003824, GO:0005576, GO:0050525	metabolic process, hydrolase activity, catalytic activity, extracellular region, cutinase activity	IPR011150, IPR000675, IPR008262	Cutinase, monofunctional, Cutinase, Lipase, active site	CUTISE, Cutinase, LIPASE_SER, CUTISE_1, CUTISE_2	Q8TGB8	Cutinase (EC 3.1.1.74) (Cutin hydrolase)	CUT1	IPR000675, IPR011150, IPR029058	Cutinase, Cutinase, monofunctional, Alpha/Beta hydrolase fold		A0A066X6Y1	IPR000675, IPR011150, IPR029058	Cutinase, Cutinase, monofunctional, Alpha/Beta hydrolase fold	KDN63439.1		100	46.75	54.35	54.35
gene8713	Cluster1	0.899201	2.12639	1.77718	1.02433	1.45678	0.262236	224175			IPR002110	Ankyrin	ANKYRIN, Ank, no description, ANK_REPEAT, ANK_REP_REGION, Ankyrin repeat	Q9HYV6	Putative ankyrin repeat protein PA3287	PA3287	IPR002110, IPR020683	Ankyrin repeat, Ankyrin repeat-containing domain	pae:PA3287	N4VXH2	IPR002110, IPR020683	Ankyrin repeat, Ankyrin repeat-containing domain	ENH85776.1		100	52.08	83.33	83.33
gene2689	Cluster1	2.65282	1.62231	1.2328	0.279978	1.44698	0.723138	249466						Q9FNY0	Transcription factor E2FA (E2F transcription factor-3) (AtE2F3)	E2FA E2F3 E2F4 At2g36010 F11F19.8	IPR003316, IPR011991, IPR015633, IPR032198	E2F/DP family, winged-helix D-binding domain, Winged helix-turn-helix D-binding domain, E2F Family, E2F transcription factor, CC-MB domain	ath:AT2G36010	G4N5W0			XP_003716056.1		100	46.15	45.63	45.63
gene6111	Cluster1	1.1835	2.66196	0.271803	1.63653	1.43845	0.740566	67786		unknown_gene		unknown_gene			unknown_gene			unknown_gene				unknown_gene
gene4353	Cluster1	0.55513	1.22964	0.663836	3.28835	1.43424	1.21148	251667	GO:0005215, GO:0006810, GO:0016021	transporter activity, transport, integral to membrane	IPR011701, IPR007114, IPR016196	Major facilitator superfamily MFS-1, Major facilitator superfamily, MFS general substrate transporter	MFS_1, MFS, MFS general substrate transporter	P28873	Benomyl/methotrexate resistance protein	MDR1 BMR	IPR004734, IPR011701, IPR020846	Multidrug resistance protein, Major facilitator superfamily, Major facilitator superfamily domain		R8BXB8	IPR011701, IPR020846	Major facilitator superfamily, Major facilitator superfamily domain	XP_007911258.1	XM_014724526.1	91.4	40.33	73.75	73.75	76.64
gene330	Cluster1	1.27464	1.52837	0.726317	2.19278	1.43053	0.277706	229221	GO:0005215, GO:0006810, GO:0016021	transporter activity, transport, integral to membrane	IPR011701, IPR007114, IPR016196	Major facilitator superfamily MFS-1, Major facilitator superfamily, MFS general substrate transporter	MFS_1, MFS, MFS general substrate transporter	Q04301	Vacuolar basic amino acid transporter 1	VBA1 YMR088C YM9582.13C	IPR011701, IPR020846	Major facilitator superfamily, Major facilitator superfamily domain	sce:YMR088C	G4MU96	IPR005829, IPR011701, IPR020846	Sugar transporter, conserved site, Major facilitator superfamily, Major facilitator superfamily domain	XP_003713784.1	XM_007579888.1	100	37.57	58.33	58.33	88.24
gene8660	Cluster1	-0.0594168	2.00894	1.96719	1.7805	1.4243	0.741207	340878	GO:0006118, GO:0016491, GO:0043738, GO:0043826, GO:0043883, GO:0051341	electron transport, oxidoreductase activity, F420H2 dehydrogenase activity, sulfur oxygenase reductase activity, malolactic enzyme activity, regulation of oxidoreductase activity	IPR003819	Taurine catabolism dioxygenase TauD/TfdA	TauD	B5BP48	Putative alpha-ketoglutarate-dependent sulfonate dioxygenase (EC 1.14.11.-)	SPBC460.04c	IPR003819	TauD/TfdA-like domain		M7SNB2	IPR003819	TauD/TfdA-like domain	XP_007795252.1	XM_003042251.1	100	51.43	77.27	77.27	73.73
NOV_008523	Cluster1	3.24703	2.18417	1.33691	-1.08169	1.4216	2.54683							Q51UJ9, J3P816	Autophagy-related protein 11, Autophagy-like protein 11 (Uncharacterized protein)	ATG11 MGG_04486, GGTG_09654 GGTG_09654	IPR019460;, IPR019460;				PF02668;, PF02668;					1422, 1506				induction of conjugation upon nitrogen starvation [GO:0031142]; macroautophagy [GO:0016236]; protein transport [GO:0015031], induction of conjugation upon nitrogen starvation [GO:0031142]; macroautophagy [GO:0016236]	,
NOV_008009	Cluster1	1.39416	2.15195	1.39363	0.743677	1.42085	0.248632							Q4AAG4, M2WJJ9	30S ribosomal protein S13, Uncharacterized protein	rpsM MHJ_0166, DOTSEDRAFT_75032	IPR027437;IPR001892;IPR010979;IPR018269;, IPR021858;IPR001138;				PF13243;PF13249;, PF00204;PF00521;PF02518;PF01751;PF16898;					33.5, 40				translation [GO:0006412],	, DOMAIN 53 83 Zn(2)-C6 fungal-type D-binding. {ECO:0000259|PROSITE:PS50048}.
gene4930	Cluster1	0.766144	2.07804	1.3263	1.51285	1.42083	0.219486	79672	GO:0005216, GO:0006811, GO:0016020	ion channel activity, ion transport, membrane	IPR001425	Rhodopsin, bacterial	BACTRLOPSIN, Bac_rhodopsin	Q9UW81	Opsin-1 (NR)	nop-1 NCU10055	IPR001425, IPR018229, IPR029730	Archaeal/bacterial/fungal rhodopsin, Rhodopsin, retinal binding site, Archaeal/bacterial/fungal rhodopsin-like	ncr:NCU10055	F7W5U5	IPR001425, IPR018229, IPR029730	Archaeal/bacterial/fungal rhodopsin, Rhodopsin, retinal binding site, Archaeal/bacterial/fungal rhodopsin-like	XP_003349330.1		100	65.22	69.57	69.57
NOV_006745	Cluster1	1.66161	2.07525	1.39296	0.545641	1.41886	0.31324							Q89X36	tR (guanine-N(1)-)-methyltransferase (EC 2.1.1.228) (M1G-methyltransferase) (tR [GM37] methyltransferase)	trmD blr0486	IPR029028;IPR002649;IPR023148;IPR029026;IPR016009;				PF01575;					32
NOV_004025	Cluster1	1.41974	1.37845	0.539716	2.32251	1.41511	0.397765								unknown_gene	unknown_gene	unknown_gene				PF00734;PF00331;,									unknown_gene
gene8500	Cluster1	0.884614	1.83684	2.20947	0.713169	1.41102	0.395737	225614						Q8TP90	Putative 30S ribosomal protein S17P-like	MA_2024	IPR000266, IPR012340, IPR019978, IPR028333	Ribosomal protein S17/S11, Nucleic acid-binding, OB-fold, Ribosomal protein S17, archaeal, Ribosomal protein S17, archaeal/eukaryotic		M2T7E3	IPR011990, IPR024983	Tetratricopeptide-like helical domain, CHAT domain	XP_007699431.1	XM_008669660.1	92.01	23.02	35.18	35.18	100
NOV_001254	Cluster1	0.880043	1.65689	3.32992	-0.236942	1.40748	1.68507							Q9VT57, T0LHL8	Cyclin-dependent kinase 8 (EC 2.7.11.22) (EC 2.7.11.23) (Cell division protein kinase 8) (DmCdk8) (Mediator complex subunit Cdk8) (Mediator of R polymerase II transcription subunit Cdk8), Uncharacterized protein	Cdk8 CG10572, CGLO_09452	IPR011009;IPR000719;IPR017441;IPR008271;, IPR011009;IPR000719;				unknown_gene					60.1, 117				axon guidance [GO:0007411]; chaeta development [GO:0022416]; G1/S transition of mitotic cell cycle [GO:0000082]; imaginal disc-derived leg segmentation [GO:0036011]; mitotic cell cycle [GO:0000278]; mitotic G2 D damage checkpoint [GO:0007095]; protein phosphorylation [GO:0006468]; sex comb development [GO:0045498]; snR 3'-end processing [GO:0034472]; transcription initiation from R polymerase II …	DOMAIN 21 335 Protein kinase. {ECO:0000255|PROSITE-ProRule:PRU00159}., DOMAIN 43 354 Protein kinase. {ECO:0000259|PROSITE:PS50011}.
NOV_005359	Cluster1	0.590894	2.29427	1.80601	0.911169	1.40059	0.464544							Q7RX39	Survival factor 1	svf-1 NCU04337	IPR033394;IPR013931;				PF02912;PF01409;					33.5				response to oxidative stress [GO:0006979]
gene4963	Cluster1	0.398388	1.64667	2.05132	1.50091	1.39932	0.374617	288265	GO:0016491	oxidoreductase activity	IPR006076	FAD dependent oxidoreductase	DAO	F5HN72	Beta-cyclopiazonate dehydrogenase (EC 1.21.99.1) (Beta-Cyclopiazonate oxidocyclase) (FAD-dependent oxidoreductase cpaO)	cpaO	IPR023753	FAD/D(P)-binding domain		U5VPX2	IPR006311, IPR016040, IPR023753	Twin-arginine translocation pathway, signal sequence, D(P)-binding domain, FAD/D(P)-binding domain	WP_023357797.1		100	33.12	41.28	41.28
NOV_012763	Cluster1	3.03625	0.177409	1.54007	0.835512	1.39731	1.12757							Q477Z4	ATP synthase subunit delta (ATP synthase F(1) sector subunit delta) (F-type ATPase subunit delta) (F-ATPase subunit delta)	atpH Daro_4111	IPR026015;IPR000711;				PF00270;PF03368;PF00271;PF02170;PF00636;, PF03663;					35.4				ATP synthesis coupled proton transport [GO:0015986]
gene8176	Cluster1	1.73573	2.19751	1.16301	0.468934	1.3913	0.41787	225189		unknown_gene		unknown_gene			unknown_gene			unknown_gene				unknown_gene
gene565	Cluster1	0.629234	1.53583	0.218467	3.16639	1.38748	1.28201	354471	GO:0004190, GO:0006508	aspartic-type endopeptidase activity, proteolysis	IPR000250, IPR008985	Peptidase G1, eqolisin, Concanavalin A-like lectin/glucanase	Q9P8R1_SCLSC_Q9P8R1;, SCYTLDPTASE, Peptidase_A4, Concanavalin A-like lectins/glucanases	P24665	Aspergillopepsin-2 (EC 3.4.23.19) (Acid protease A) (Aspergillopepsin II) (Proctase A) [Cleaved into: Aspergillopepsin-2 light chain (Aspergillopepsin II light chain); Aspergillopepsin-2 heavy chain (Aspergillopepsin II heavy chain)]		IPR000250, IPR013320	Peptidase G1, Concanavalin A-like lectin/glucanase domain		W9C8C1	IPR000250, IPR013320	Peptidase G1, Concanavalin A-like lectin/glucanase domain	ESZ92048.1	XM_013473640.1	100	58.06	62.03	62.03	79.02
NOV_008607	Cluster1	1.16476	1.18965	2.50196	0.693367	1.38743	0.453147							Q9LIG0, K1RNL5	Clavaminate synthase-like protein At3g21360 (EC 1.-.-.-), Uncharacterized protein	At3g21360 MHC9_4, CGI_10027319	IPR003819;, IPR003819;									326, 336				,	, DOMAIN 69 352 TauD. {ECO:0000259|Pfam:PF02668}.
gene2611	Cluster1	1.65801	0	1.32999	2.55211	1.38503	0.839484	75454	GO:0000166, GO:0017111, GO:0005488	nucleotide binding, nucleoside-triphosphatase activity, binding	IPR007111, IPR003593, IPR016024	CHT nucleoside triphosphatase, AAA+ ATPase, core, Armadillo-type fold	CHT, no description, ARM repeat	Q8R4B8	CHT, LRR and PYD domains-containing protein 3 (Cold autoinflammatory syndrome 1 protein homolog) (Cryopyrin) (Mast cell maturation-associated-inducible protein 1) (PYRIN-containing APAF1-like protein 1)	Nlrp3 Cias1 Mmig1 Nalp3 Pypaf1	IPR001611, IPR003590, IPR004020, IPR007111, IPR011029, IPR027417, IPR029495, IPR032675	Leucine-rich repeat, Leucine-rich repeat, ribonuclease inhibitor subtype, DAPIN domain, CHT nucleoside triphosphatase, Death-like domain, P-loop containing nucleoside triphosphate hydrolase, CHT-associated domain, Leucine-rich repeat domain, L domain-like	mmu:216799	G9MZ30	IPR003593, IPR007111, IPR011989, IPR016024, IPR027417, IPR029058	AAA+ ATPase domain, CHT nucleoside triphosphatase, Armadillo-like helical, Armadillo-type fold, P-loop containing nucleoside triphosphate hydrolase, Alpha/Beta hydrolase fold	EHK20358.1		100	22.67	44.19	44.19
NOV_008064	Cluster1	2.6499	0.72901	1.32819	0.82319	1.38257	0.587282							O66686, J0XH43	Triosephosphate isomerase (TIM) (TPI) (EC 5.3.1.1) (Triose-phosphate isomerase), Processed neurogenic locus Notch protein	tpiA timA aq_360, LOAG_18416	IPR013785;IPR022896;IPR000652;IPR020861;, IPR011038;IPR014878;IPR001881;IPR013032;IPR000742;IPR000152;IPR018097;IPR002861;IPR003582;				PF07679;PF13895;					31.2, 39.7				gluconeogenesis [GO:0006094]; glyceraldehyde-3-phosphate biosynthetic process [GO:0046166]; glycerol catabolic process [GO:0019563]; glycolytic process [GO:0006096]; pentose-phosphate shunt [GO:0006098],	, DOMAIN 426 465 EGF-like. {ECO:0000259|PROSITE:PS50026}.; DOMAIN 501 537 EGF-like. {ECO:0000259|PROSITE:PS50026}.; DOMAIN 539 575 EGF-like. {ECO:0000259|PROSITE:PS50026}.; DOMAIN 578 615 ShKT. {ECO:0000259|PROSITE:PS51670}.
gene6680	Cluster1	1.37656	1.36937	0.756919	2.01462	1.37937	0.197773	330259												Q3B5L2	IPR001130, IPR015991, IPR032466	TatD family, Uncharacterised deoxyribonuclease TatD-type, Metal-dependent hydrolase	WP_011357244.1		100		48.78	48.78
gene1054	Cluster1	1.60742	1.8736	2.01007	0	1.37277	0.649133	335314	GO:0016491, GO:0005507, GO:0008447	oxidoreductase activity, copper ion binding, L-ascorbate oxidase activity	IPR001117, IPR011706, IPR011707, IPR008972	Multicopper oxidase, type 1, Multicopper oxidase, type 2, Multicopper oxidase, type 3, Cupredoxin	Cu-oxidase, Cu-oxidase_2, Cu-oxidase_3, Cupredoxins	P17489	Laccase-1 (EC 1.10.3.2) (Benzenediol:oxygen oxidoreductase 1) (Conidial laccase) (Diphenol oxidase 1) (Laccase I) (Urishiol oxidase 1)	yA AN6635	IPR001117, IPR002355, IPR008972, IPR011706, IPR011707	Multicopper oxidase, type 1, Multicopper oxidase, copper-binding site, Cupredoxin, Multicopper oxidase, type 2, Multicopper oxidase, type 3	ani:AN6635.2	A0A066XFI1	IPR001117, IPR008972, IPR011706, IPR011707	Multicopper oxidase, type 1, Cupredoxin, Multicopper oxidase, type 2, Multicopper oxidase, type 3	KDN64516.1		97.3	39.13	90.91	90.91
gene5673	Cluster1	0.980908	1.14862	1.26521	2.0933	1.37201	0.183634	356048		unknown_gene		unknown_gene			unknown_gene			unknown_gene		K9HWN7		unknown_gene	XP_006454701.1		99.15		37.31	37.31
NOV_004516	Cluster1	0.900949	1.37104	0.921937	2.29126	1.3713	0.31737							A8H7G5, G2Q6F6	D-dependent malic enzyme (D-ME) (EC 1.1.1.38), Uncharacterized protein	maeA Spea_3186, MYCTH_64320	IPR015884;IPR012301;IPR012302;IPR001891;IPR016040;IPR023667;,				PF00385;,					30.8, 39.3				malate metabolic process [GO:0006108],	,
gene8737	Cluster1	1.14037	1.24348	1.00061	2.09355	1.3695	0.182179	293064						Q6F854	3-methyl-2-oxobutanoate hydroxymethyltransferase (EC 2.1.2.11) (Ketopantoate hydroxymethyltransferase) (KPHMT)	panB ACIAD3061	IPR003700, IPR015813	Ketopantoate hydroxymethyltransferase, Pyruvate/Phosphoenolpyruvate kinase-like domain	aci:ACIAD3061	C7ZHI8	IPR027417	P-loop containing nucleoside triphosphate hydrolase	XP_003042265.1	XM_007838865.1	99.61	34	61.96	61.96	76.9
NOV_009399	Cluster1	1.01111	2.47368	1.72651	0.256248	1.36689	0.678604							Q96GX5, F1PAU3	Serine/threonine-protein kinase greatwall (GW) (GWL) (hGWL) (EC 2.7.11.1) (Microtubule-associated serine/threonine-protein kinase-like) (MAST-L), Uncharacterized protein	MASTL GW GWL THC2, TMPRSS15	IPR000961;IPR011009;IPR000719;IPR008271;, IPR013320;IPR000859;IPR023415;IPR002172;IPR000998;IPR009003;IPR001314;IPR000082;IPR001190;IPR017448;IPR001254;IPR018114;IPR033116;				PF01695;,					37.7, 38.5				cell division [GO:0051301]; cellular response to D damage stimulus [GO:0006974]; female meiosis II [GO:0007147]; G2/M transition of mitotic cell cycle [GO:0000086]; intracellular signal transduction [GO:0035556]; mitotic nuclear division [GO:0007067]; negative regulation of protein phosphatase type 2A activity [GO:0034048]; peptidyl-serine phosphorylation [GO:0018105]; regulation of cell cycle [G…	DOMAIN 35 835 Protein kinase. {ECO:0000255|PROSITE-ProRule:PRU00159}.; DOMAIN 836 879 AGC-kinase C-terminal., DOMAIN 54 169 SEA. {ECO:0000259|PROSITE:PS50024}.; DOMAIN 240 350 CUB. {ECO:0000259|PROSITE:PS01180}.; DOMAIN 361 520 MAM. {ECO:0000259|PROSITE:PS50060}.; DOMAIN 540 650 CUB. {ECO:0000259|PROSITE:PS01180}.; DOMAIN 695 805 SRCR. {ECO:0000259|PROSITE:PS50287}.; DOMAIN 802 1036 Peptidase S1.…
gene5609	Cluster1	0.613024	2.09879	1.58409	1.10786	1.35094	0.304312	60296	GO:0016491, GO:0004344, GO:0018446, GO:0018447, GO:0018448, GO:0018449, GO:0018450, GO:0042469, GO:0045703	oxidoreductase activity, glucose dehydrogenase activity, pinocarveol dehydrogenase activity, chloral hydrate dehydrogenase activity, hydroxymethylmethylsilanediol oxidase activity, 1-phenylethanol dehydrogenase activity, myrtenol dehydrogenase activity, versicolorin reductase activity, ketoreductase activity	IPR001395	Aldo/keto reductase	O32210_BACSU_O32210;, ALDKETRDTASE, Aldo_ket_red, D(P)-linked oxidoreductase	P22045	Prostaglandin F synthase (EC 1.1.1.188) (Prostaglandin F2-alpha synthase)	P100/11E	IPR001395, IPR018170, IPR020471, IPR023210	Aldo/keto reductase/potassium channel subunit beta, Aldo/keto reductase, conserved site, Aldo/keto reductase, DP-dependent oxidoreductase domain	lma:LMJF_31_2150	F9F460	IPR001395, IPR002495, IPR018170, IPR020471, IPR023210, IPR029044	Aldo/keto reductase/potassium channel subunit beta, Glycosyl transferase, family 8, Aldo/keto reductase, conserved site, Aldo/keto reductase, DP-dependent oxidoreductase domain, Nucleotide-diphospho-sugar transferases	EGU88290.1		99.12	44.24	58.56	58.56
gene4911	Cluster1	1.05513	1.8736	2.47041	0	1.34978	0.85973	254611		unknown_gene		unknown_gene			unknown_gene			unknown_gene				unknown_gene
gene7066	Cluster1	1.36186	1.36898	-0.0874303	2.73829	1.34542	0.998493	70848	GO:0005634	nucleus	IPR001214	SET	no description, SET	Q803K4	N-lysine methyltransferase setd6 (EC 2.1.1.-) (SET domain-containing protein 6)	setd6 zgc:55627	IPR001214, IPR011383, IPR015353	SET domain, N-lysine methyltransferase SETD6, Rubisco LSMT, substrate-binding domain	dre:322348	U7PQ41	IPR001214	SET domain	ERS96859.1		100	36.07	43.06	43.06
gene10944	Cluster1	0.717014	1.5836	0.531914	2.54447	1.34425	0.637785	358294												S3CQK3	IPR011038, IPR012674	Calycin-like, Calycin	KGO74914.1		100		45.68	39.11
NOV_009494	Cluster1	3.15569	1.53275	-0.781732	1.46186	1.34214	1.96262							Q9NU63	Zinc finger protein 57 homolog (Zfp-57) (Zinc finger protein 698)	ZFP57 C6orf40 ZNF698	IPR001909;IPR007087;IPR015880;IPR013087;				PF01467;					30.4				D methylation involved in embryo development [GO:0043045]; negative regulation of transcription from R polymerase II promoter [GO:0000122]; regulation of gene expression by genetic imprinting [GO:0006349]; transcription, D-templated [GO:0006351]	DOMAIN 16 88 KRAB. {ECO:0000255|PROSITE-ProRule:PRU00119}.
gene7469	Cluster1	1.18424	1.85589	2.20633	0.120426	1.34172	0.63207	330554						Q63358	Unconventional myosin-IXb (Unconventional myosin-9b)	Myo9b Myr5	IPR000048, IPR000159, IPR000198, IPR001609, IPR002219, IPR008936, IPR027417, IPR028557, IPR029071	IQ motif, EF-hand binding site, Ras-associating (RA) domain, Rho GTPase-activating protein domain, Myosin head, motor domain, Protein kinase C-like, phorbol ester/diacylglycerol-binding domain, Rho GTPase activation protein, P-loop containing nucleoside triphosphate hydrolase, Unconventional myosin-IXb, Ubiquitin-related domain							88.01	36.67
gene8980	Cluster1	0.450835	1.10931	0.0878389	3.71188	1.33997	2.00939	242078	GO:0004190, GO:0006508	aspartic-type endopeptidase activity, proteolysis	IPR000250, IPR008985	Peptidase G1, eqolisin, Concanavalin A-like lectin/glucanase	PRTA_ASPNG_P24665;, SCYTLDPTASE, Peptidase_A4, Concanavalin A-like lectins/glucanases	P24665	Aspergillopepsin-2 (EC 3.4.23.19) (Acid protease A) (Aspergillopepsin II) (Proctase A) [Cleaved into: Aspergillopepsin-2 light chain (Aspergillopepsin II light chain); Aspergillopepsin-2 heavy chain (Aspergillopepsin II heavy chain)]		IPR000250, IPR013320	Peptidase G1, Concanavalin A-like lectin/glucanase domain		W3XGK4	IPR000250, IPR013320	Peptidase G1, Concanavalin A-like lectin/glucanase domain	XP_007829957.1	XM_001795664.1	100	60.63	61.9	61.9	79.34
gene3854	Cluster1	0.957002	2.26155	1.25277	0.873282	1.33615	0.305331	75855	GO:0006950, GO:0016021	response to stress, integral to membrane	IPR007568	RTA1 like protein	RTA1	C8ZI10	Sphingoid long-chain base transporter RSB1	RSB1 EC1118_1O4_2476g	IPR007568	RTA-like protein		Q2UAY4	IPR007568	RTA-like protein	KGO48074.1		99.26	40.68	54.35	50.6
gene6925	Cluster1	0.925092	1.17409	0.502669	2.73723	1.33477	0.713238	277862	GO:0003824, GO:0005488, GO:0008152, GO:0003960	catalytic activity, binding, metabolic process, DPH:quinone reductase activity	IPR013149, IPR013154, IPR011032, IPR016040	Alcohol dehydrogenase, zinc-binding, Alcohol dehydrogenase GroES-like, GroES-like, D(P)-binding	ADH_zinc_N, ADH_N, GroES-like, D(P)-binding Rossmann-fold domains	P25608	Uncharacterized protein YCR102C	YCR102C	IPR002085, IPR011032, IPR013149, IPR016040	Alcohol dehydrogenase superfamily, zinc-type, GroES-like, Alcohol dehydrogenase, C-terminal, D(P)-binding domain	sce:YCR102C	A0A024S1Y9	IPR002085, IPR011032, IPR013149, IPR013154, IPR016040	Alcohol dehydrogenase superfamily, zinc-type, GroES-like, Alcohol dehydrogenase, C-terminal, Alcohol dehydrogenase, N-terminal, D(P)-binding domain	XP_006967916.1		88.6	30.91	57.29	57.29
gene4964	Cluster1	0.645025	1.24621	3.04384	0.400944	1.33401	1.06913	61234		unknown_gene		unknown_gene			unknown_gene			unknown_gene		W3WLA6		unknown_gene	XP_007840580.1		100		65.8	65.8
gene4317	Cluster1	0.299602	1.46133	1.13291	2.4267	1.33013	0.580143	228570	GO:0004497, GO:0006118, GO:0006725, GO:0008152, GO:0016491, GO:0018662	monooxygenase activity, electron transport, aromatic compound metabolic process, metabolic process, oxidoreductase activity, phenol 2-monooxygenase activity	IPR013027, IPR003042, IPR002938	FAD-dependent pyridine nucleotide-disulphide oxidoreductase, Aromatic-ring hydroxylase, Monooxygenase, FAD-binding	FADPNR, RNGMNOXGSE, FAD_binding_3	O07561	Uncharacterized aromatic compound monooxygenase YhjG (EC 1.14.13.-)	yhjG BSU10500	IPR002938, IPR023753	FAD-binding domain, FAD/D(P)-binding domain	bsu:BSU10500	W3XMD4	IPR002938, IPR012336, IPR023753	FAD-binding domain, Thioredoxin-like fold, FAD/D(P)-binding domain	XP_007827803.1		100	57.14	52.83	52.83
gene9581	Cluster1	0.58117	1.72209	0.876328	2.13708	1.32917	0.392917	45552	GO:0003824, GO:0005488, GO:0008152, GO:0003960	catalytic activity, binding, metabolic process, DPH:quinone reductase activity	IPR013154, IPR011032, IPR016040	Alcohol dehydrogenase GroES-like, GroES-like, D(P)-binding	ADH_N, GroES-like, D(P)-binding Rossmann-fold domains	P11415	Quinone oxidoreductase (EC 1.6.5.5) (DPH:quinone reductase) (Zeta-crystallin)	CRYZ	IPR002085, IPR002364, IPR011032, IPR013149, IPR013154, IPR016040	Alcohol dehydrogenase superfamily, zinc-type, Quinone oxidoreductase/zeta-crystallin, conserved site, GroES-like, Alcohol dehydrogenase, C-terminal, Alcohol dehydrogenase, N-terminal, D(P)-binding domain		F7WAA6	IPR002085, IPR011032, IPR016040	Alcohol dehydrogenase superfamily, zinc-type, GroES-like, D(P)-binding domain	KHE83127.1		100	24.34	62.07	58.13
gene9816	Cluster1	0.669202	-0.132795	1.71766	3.05514	1.3273	1.4257	264580	GO:0008270, GO:0016491, GO:0003824, GO:0005488, GO:0008152, GO:0008106	zinc ion binding, oxidoreductase activity, catalytic activity, binding, metabolic process, alcohol dehydrogenase (DP+) activity	IPR013149, IPR013154, IPR002328, IPR011032, IPR016040	Alcohol dehydrogenase, zinc-binding, Alcohol dehydrogenase GroES-like, Alcohol dehydrogenase, zinc-containing, conserved site, GroES-like, D(P)-binding	ADH_zinc_N, ADH_N, ADH_ZINC, GroES-like, D(P)-binding Rossmann-fold domains	Q04894	DP-dependent alcohol dehydrogenase 6 (EC 1.1.1.2) (DP-dependent alcohol dehydrogenase VI) (ScADHVI)	ADH6 YMR318C YM9924.10C	IPR002085, IPR002328, IPR011032, IPR013149, IPR013154, IPR016040	Alcohol dehydrogenase superfamily, zinc-type, Alcohol dehydrogenase, zinc-type, conserved site, GroES-like, Alcohol dehydrogenase, C-terminal, Alcohol dehydrogenase, N-terminal, D(P)-binding domain	sce:YMR318C	W3WGQ9	IPR002085, IPR002328, IPR011032, IPR013149, IPR013154, IPR016040	Alcohol dehydrogenase superfamily, zinc-type, Alcohol dehydrogenase, zinc-type, conserved site, GroES-like, Alcohol dehydrogenase, C-terminal, Alcohol dehydrogenase, N-terminal, D(P)-binding domain	XP_007842057.1		100	47	72.91	72.91
gene11585	Cluster1	1.13398	1.46374	0.688113	2.01305	1.32472	0.233693	343250	GO:0008800, GO:0030655, GO:0046677	beta-lactamase activity, beta-lactam antibiotic catabolic process, response to antibiotic	IPR001466, IPR012338	Beta-lactamase, Beta-lactamase-type transpeptidase fold	Beta-lactamase, beta-lactamase/transpeptidase-like	Q9Y7D1	Acyltransferase LovD (EC 2.3.1.238) (Lovastatin hydrolase) (Simvastatin synthase LovD) (SV synthase)	lovD	IPR001466, IPR012338	Beta-lactamase-related, Beta-lactamase/transpeptidase-like		R8BGS7	IPR001466, IPR012338	Beta-lactamase-related, Beta-lactamase/transpeptidase-like	XP_007916692.1	XM_009228804.1	100	31.13	54.29	54.29	92.31
gene9493	Cluster1	2.41512	0.347968	0.621378	1.9123	1.32419	0.745739	333271	GO:0005576, GO:0009405	extracellular region, pathogenesis	IPR015131, IPR011329	Killer toxin, Kp4, Killer toxin, Kp4/SMK-like, core	Kp4, Yeast killer toxins							Q2UKQ5	IPR011329, IPR015131	Killer toxin Kp4/SMK, Killer toxin, Kp4	XP_001819862.1		100		38.6	38.6
gene10784	Cluster1	1.05513	0.916974	2.65513	0.667301	1.32363	0.610278	74871						Q5HFZ5	UPF0403 protein SACOL1464	SACOL1464	IPR009474	Putative bacilliredoxin, YphP/YqiW family	sac:SACOL1464						100	66.67
NOV_006433	Cluster1	3.85313	0	2.1248	-0.727037	1.31272	3.24925							Q6AJL7	Ribose-phosphate pyrophosphokinase (RPPK) (EC 2.7.6.1) (5-phospho-D-ribosyl alpha-1-diphosphate) (Phosphoribosyl diphosphate synthase) (Phosphoribosyl pyrophosphate synthase) (P-Rib-PP synthase) (PRPP synthase) (PRPPase)	prs DP2734	IPR000842;IPR029099;IPR000836;IPR029057;IPR005946;				unknown_gene					34.3				5-phosphoribose 1-diphosphate biosynthetic process [GO:0006015]; nucleoside metabolic process [GO:0009116]; nucleotide biosynthetic process [GO:0009165]; ribonucleoside monophosphate biosynthetic process [GO:0009156]
gene9325	Cluster1	-0.0157005	1.79267	2.79286	0.677689	1.31188	1.14728	243920			IPR010730	Heterokaryon incompatibility	HET	Q9UV10	Heterokaryon incompatibility protein 6, OR allele (Het-6(OR))	het-6 B2A19.100 NCU03533	IPR010730	Heterokaryon incompatibility	ncr:NCU03533	T0KFS6	IPR010730	Heterokaryon incompatibility	EQB54282.1		100	33.33	42.03	42.03
gene4005	Cluster1	1.60815	1.14869	-0.473772	2.94979	1.30822	1.49641	69089	GO:0008270	zinc ion binding	IPR002893	Zinc finger, MYND-type	zf-MYND, ZF_MYND_2, ZF_MYND_1	Q09415	SET domain-containing protein 14	set-14 R06F6.4	IPR002893	Zinc finger, MYND-type	cel:CELE_R06F6.4	G2YP63	IPR002893	Zinc finger, MYND-type	CCD53411.1		100	45.83	27.19	27.19
gene8815	Cluster1	0.765152	1.26803	2.08948	1.09528	1.30449	0.238047	323213						Q9UV10	Heterokaryon incompatibility protein 6, OR allele (Het-6(OR))	het-6 B2A19.100 NCU03533	IPR010730	Heterokaryon incompatibility	ncr:NCU03533	W3WU42	IPR010730	Heterokaryon incompatibility	XP_007838044.1		100	33.87	31.68	31.68
gene7676	Cluster1	0.780129	3.13744	0.643351	0.65294	1.30347	1.12407	322673						Q98IG7	UPF0260 protein mll2411	mll2411	IPR005358, IPR008228	Putative zinc- or iron-chelating domain containing protein, Uncharacterised conserved protein UCP006173	mlo:mll2411	J4WGM5			KGQ08903.1			54.55	51.39	51.39
gene392	Cluster1	2.22754	0.991611	1.59803	0.378569	1.29894	0.473323	325599		unknown_gene		unknown_gene			unknown_gene			unknown_gene		G2R6B7		unknown_gene	XP_003654786.1		100		78.57	78.57
gene4852	Cluster1	0.688213	2.00206	1.26449	1.22618	1.29524	0.218449	350380		unknown_gene		unknown_gene			unknown_gene			unknown_gene		U7PI65		unknown_gene	ERS95232.1	XM_001966423.2	100		82.5	82.5	100
gene4891	Cluster1	0.859318	1.17827	0.941411	2.19371	1.29318	0.284032	252334			IPR004119, IPR015897, IPR011009	Protein of unknown function DUF227, CHK kinase-like, Protein kinase-like	DUF227, no description, Protein kinase-like (PK-like)	Q9ASX5	Uncharacterized aarF domain-containing protein kinase At5g05200, chloroplastic (EC 2.7.-.-)	At5g05200 K2A11.7	IPR004147, IPR011009	UbiB domain, Protein kinase-like domain	ath:AT5G05200	G9MV27	IPR004119, IPR011009	Protein of unknown function DUF227, Protein kinase-like domain	EHK21682.1	XM_014089885.1	100	56.52	85.79	85.79	81.74
gene2431	Cluster1	1.03657	1.17008	0.449533	2.51307	1.29231	0.570221	353958	GO:0016491, GO:0004672, GO:0005524, GO:0006468, GO:0050236	oxidoreductase activity, protein kinase activity, ATP binding, protein amino acid phosphorylation, pyridoxine 4-dehydrogenase activity	IPR001395, IPR017441	Aldo/keto reductase, Protein kinase ATP binding, conserved site	Q7S2K8_NEUCR_Q7S2K8;, Aldo_ket_red, PROTEIN_KISE_ATP, D(P)-linked oxidoreductase												100
gene9458	Cluster1	2.67571	0	0.813116	1.63653	1.28134	0.982874	323708		unknown_gene		unknown_gene			unknown_gene			unknown_gene				unknown_gene
NOV_002795	Cluster1	2.0662	0.988037	0.470286	1.59949	1.281	0.365264							Q10286	Myo-inositol transporter 1	itr1 SPAC4F8.15 SPAC7D4.01	IPR020846;IPR005828;IPR003663;IPR005829;				PF00646;,					31.6				carbohydrate import across plasma membrane [GO:0098704]; glucose import [GO:0046323]; hexose transmembrane transport [GO:0035428]
gene1794	Cluster1	1.38971	2.10755	1.03538	0.577656	1.27757	0.312493	67284						Q3AK67	Dihydroxy-acid dehydratase (DAD) (EC 4.2.1.9)	ilvD Syncc9605_1260	IPR000581, IPR004404, IPR015928, IPR020558	Dihydroxy-acid/6-phosphogluconate dehydratase, Dihydroxy-acid dehydratase, Aconitase/3-isopropylmalate dehydratase, swivel, Dihydroxy-acid/6-phosphogluconate dehydratase, conserved site	syd:Syncc9605_1260	A8SXU4	IPR000640, IPR019199, IPR021127	Translation elongation factor EFG, V domain, Virulence-associated protein D / CRISPR associated protein Cas2, CRISPR-associated endonuclease Cas2	WP_004853858.1		100	37.78	34.85	34.85
gene1495	Cluster1	0.916848	2.20066	1.09243	0.860528	1.26762	0.297504	320325						B5YJ12	Glycine--tR ligase beta subunit (EC 6.1.1.14) (Glycyl-tR synthetase beta subunit) (GlyRS)	glyS THEYE_A2099	IPR006194, IPR008909, IPR009080, IPR015944	Glycine-tR synthetase, heterodimeric, DALR anticodon binding, Aminoacyl-tR synthetase, class 1a, anticodon-binding, Glycine-tR ligase, beta subunit	tye:THEYE_A2099	A0A086CNT9			WP_024584457.1			50	56	42.55
gene1286	Cluster1	0.895197	1.25982	0.801735	2.10969	1.26661	0.266223	249014						Q68CJ6	Nuclear GTPase SLIP-GC (EC 3.6.1.-) (Speckled-like pattern in the germinal center)	NUGGC C8orf80 HMFN0672	IPR022812, IPR027417	Dynamin superfamily, P-loop containing nucleoside triphosphate hydrolase	hsa:389643	Q2H2R1	IPR022812, IPR027417	Dynamin superfamily, P-loop containing nucleoside triphosphate hydrolase	XP_001223149.1		98.7	52.63	53.09	53.09
NOV_010703	Cluster1	2.27454	1.11374	0.202015	1.4659	1.26405	0.553085								unknown_gene	unknown_gene	unknown_gene				PF00276;									unknown_gene
gene2693	Cluster1	1.65801	0	0.813116	2.55211	1.25581	0.9038	249383						B8I784	UPF0251 protein Ccel_0627	Ccel_0627	IPR002852	Uncharacterised protein family UPF0251	cce:Ccel_0627	R8BPG4	IPR009571	Membrane protein SUR7/Rim9-like, fungi	XP_007914168.1		97.44	31.58	48.21	48.21
gene3847	Cluster1	0.728713	2.08018	1.46912	0.743773	1.25545	0.316276	345080	GO:0005215, GO:0006810, GO:0016021	transporter activity, transport, integral to membrane	IPR011701, IPR007114, IPR016196	Major facilitator superfamily MFS-1, Major facilitator superfamily, MFS general substrate transporter	MFS_1, MFS, MFS general substrate transporter	Q7Z9I0	Uncharacterized MFS-type transporter C409.08	SPBC409.08	IPR005829, IPR011701, IPR020846	Sugar transporter, conserved site, Major facilitator superfamily, Major facilitator superfamily domain	spo:SPBC409.08	G9NKC4	IPR011701, IPR020846	Major facilitator superfamily, Major facilitator superfamily domain	EHK49342.1		100	38.13	65.17	65.17
gene3632	Cluster1	0.595817	1.50734	0.716258	2.19195	1.25284	0.416574	355084						E4UYL6	Probable dipeptidyl-aminopeptidase B (DPAP B) (EC 3.4.14.5)	DAPB MGYG_05182	IPR001375, IPR002469, IPR029058	Peptidase S9, prolyl oligopeptidase, catalytic domain, Dipeptidylpeptidase IV, N-terminal domain, Alpha/Beta hydrolase fold		W9YBW0	IPR029058, IPR029059	Alpha/Beta hydrolase fold, Alpha/beta hydrolase fold-5	KGO44370.1		100	32.1	49.59	46.69
gene3019	Cluster1	0.753706	1.64663	2.19321	0.384355	1.24448	0.510622	243966		unknown_gene		unknown_gene			unknown_gene			unknown_gene		B2ANC6		unknown_gene	XP_003437439.1		100		48.08	48.08
gene9779	Cluster1	1.14567	0.848214	0.929227	2.02861	1.23793	0.220215	280733	GO:0016787, GO:0003824, GO:0017168	hydrolase activity, catalytic activity, 5-oxoprolinase (ATP-hydrolyzing) activity	IPR002821, IPR003692, IPR008040	Hydantoinase/oxoprolinase, Hydantoinase B/oxoprolinase, Hydantoinaseoxoprolinase, N-terminal	Hydantoinase_A, Hydantoinase_B, Hydant_A_N	Q10094	Uncharacterized protein C11D3.15	SPAC11D3.15	IPR002821, IPR003692, IPR008040	Hydantoinase/oxoprolinase, Hydantoinase B/oxoprolinase, Hydantoinaseoxoprolinase, N-terminal	spo:SPAC11D3.15	M7T8N2	IPR002821, IPR003692, IPR008040	Hydantoinase/oxoprolinase, Hydantoinase B/oxoprolinase, Hydantoinaseoxoprolinase, N-terminal	XP_007794712.1	XM_014319631.1	100	62.26	90.48	90.48	72.67
gene3977	Cluster1	1.15845	2.17956	0.66476	0.939704	1.23562	0.327604	355386						Q5XV31	FRIGIDA-like protein 5	FRL5 At5g27230 A_TM021B04.8	IPR012474	Frigida-like	ath:AT5G27230	N4W625			ENH88886.1		94.39	31.52	46.7	46.7
gene2647	Cluster1	2.08193	2.18669	0	0.667301	1.23398	0.867626	75537						Q1IKG0	Transcriptional regulator MraZ	mraZ Acid345_3639	IPR003444, IPR007159, IPR020603	Transcriptional regulator MraZ, SpoVT-AbrB domain, MraZ domain	aba:Acid345_3639						100	58.33
gene3192	Cluster1	0.632386	1.09091	2.1993	0.998176	1.23019	0.342445	355257	GO:0004364	glutathione transferase activity	IPR004045, IPR010987, IPR012336	Glutathione S-transferase, N-terminal, Glutathione S-transferase, C-terminal-like, Thioredoxin-like fold	GST_N, Glutathione S-transferase (GST), C-terminal domain, Thioredoxin-like	P78417	Glutathione S-transferase omega-1 (GSTO-1) (EC 2.5.1.18) (Glutathione S-transferase omega 1-1) (GSTO 1-1) (Glutathione-dependent dehydroascorbate reductase) (EC 1.8.5.1) (Monomethylarsonic acid reductase) (MMA(V) reductase) (EC 1.20.4.2) (S-(Phenacyl)glutathione reductase) (SPG-R)	GSTO1 GSTTLP28	IPR004045, IPR004046, IPR005442, IPR010987, IPR012336	Glutathione S-transferase, N-terminal, Glutathione S-transferase, C-terminal, Glutathione S-transferase, omega-class, Glutathione S-transferase, C-terminal-like, Thioredoxin-like fold	hsa:9446	M7SSF7	IPR004045, IPR010987, IPR012336	Glutathione S-transferase, N-terminal, Glutathione S-transferase, C-terminal-like, Thioredoxin-like fold	XP_007793755.1		89.89	22.89	70.88	70.88
gene8154	Cluster1	0.939312	2.21434	1.09849	0.641195	1.22334	0.35431	323097	GO:0008152, GO:0016491, GO:0006118, GO:0018658	metabolic process, oxidoreductase activity, electron transport, salicylate 1-monooxygenase activity	IPR003042, IPR003953	Aromatic-ring hydroxylase, Fumarate reductase/succinate dehydrogenase flavoprotein, N-terminal	RNGMNOXGSE, FAD_binding_2
NOV_003109	Cluster1	1.47528	0.722859	0.549333	2.1187	1.21654	0.392432							Q28SY7	UPF0753 protein Jann_1258	Jann_1258	IPR018752;				unknown_gene					31.6
gene10481	Cluster1	-0.269869	2.21166	0.543404	2.37489	1.21502	1.24864	333411						Q1JED6	tR uridine 5-carboxymethylaminomethyl modification enzyme MnmG (Glucose-inhibited division protein A)	mnmG gidA MGAS10270_Spy1957	IPR002218, IPR004416, IPR020595, IPR023753, IPR026904	tR uridine 5-carboxymethylaminomethyl modification enzyme MnmG-related, tR uridine 5-carboxymethylaminomethyl modification enzyme MnmG, MnmG-related, conserved site, FAD/D(P)-binding domain, GidA associated domain 3	sph:MGAS10270_Spy1957				WP_025108355.1		97.87	29.87	40.91
NOV_010250	Cluster1	2.43724	1.18965	0.322991	0.892272	1.21054	0.598568							C5Z7K4	Alanine--tR ligase, chloroplastic/mitochondrial (EC 6.1.1.7) (Alanyl-tR synthetase) (AlaRS)	Sb10g008780	IPR002318;IPR018162;IPR018165;IPR018164;IPR023033;IPR027522;IPR003156;IPR018163;IPR009000;IPR012947;				PF00982;, PF00373;PF00612;PF00063;PF00784;					30.4				alanyl-tR aminoacylation [GO:0006419]; embryo development ending in seed dormancy [GO:0009793]; tR modification [GO:0006400]
gene8621	Cluster1	-0.00343804	1.07326	0.123786	3.64576	1.20984	2.15098	227470	GO:0004289, GO:0006508, GO:0008236, GO:0019131	subtilase activity, proteolysis, serine-type peptidase activity, tripeptidyl-peptidase I activity	IPR015366, IPR000209, IPR009020	Peptidase S53, propeptide, Peptidase S8 and S53, subtilisin, kexin, sedolisin, Proteinase inhibitor, propeptide	Pro-kuma_activ, SUBTILASE_SER, Subtilisin-like, Protease propeptides/inhibitors
gene2798	Cluster1	-0.373333	2.41009	1.56754	1.23064	1.20874	1.01886	354909		unknown_gene		unknown_gene			unknown_gene			unknown_gene		C4JR87		unknown_gene	XP_002544052.1		100		53.06	53.06
NOV_007986	Cluster1	2.23478	0.773613	1.13168	0.693367	1.20836	0.378411							A1SAF6, S7U2Y1	Probable alpha-L-glutamate ligase 2 (EC 6.3.2.-), Uncharacterized protein	rimK2 Sama_3160, dsx2_0035	IPR011761;IPR013651;IPR013815;IPR013816;IPR016185;IPR023533;IPR004666;, IPR000620;				PF00887;					35.8, 38.9				cellular protein modification process [GO:0006464]; translation [GO:0006412],	DOMAIN 104 287 ATP-grasp. {ECO:0000255|HAMAP-Rule:MF_01552}., DOMAIN 55 193 EamA. {ECO:0000259|Pfam:PF00892}.; DOMAIN 207 341 EamA. {ECO:0000259|Pfam:PF00892}.
NOV_008703	Cluster1	2.4565	1.43477	-0.299776	1.22586	1.20434	0.97096							D7LBH0	Putative uncharacterized protein	ARALYDRAFT_901234	IPR012337;				unknown_gene					36.2
gene3484	Cluster1	0.548845	1.12201	0.576273	2.55553	1.20067	0.664148	337038			IPR012877, IPR015897, IPR011009	Protein of unknown function DUF1679, Caenorhabditis species, CHK kinase-like, Protein kinase-like	DUF1679, no description, Protein kinase-like (PK-like)	Q8NH76	Olfactory receptor 56B4 (Olfactory receptor OR11-67)	OR56B4	IPR000725, IPR017452	Olfactory receptor, GPCR, rhodopsin-like, 7TM	hsa:196335	R8BX47	IPR004119, IPR011009	Protein of unknown function DUF227, Protein kinase-like domain	XP_007911437.1		100	26.53	68.89	68.89
gene11456	Cluster1	1.05513	0	0.813116	2.9043	1.19314	1.12878	334518	GO:0016614, GO:0050660, GO:0008812	oxidoreductase activity, acting on CH-OH group of donors, FAD binding, choline dehydrogenase activity	IPR000172, IPR007867	Glucose-methanol-choline oxidoreductase, N-terminal, Glucose-methanol-choline oxidoreductase, C-terminal	GMC_oxred_N, GMC_oxred_C, GMC_OXRED_2
gene9059	Cluster1	3.09514	0.144785	0.64862	0.880433	1.19224	1.27773	262286						A5D0V1	Protease HtpX homolog (EC 3.4.24.-)	htpX PTH_1960	IPR001915, IPR022919	Peptidase M48, Peptidase M48, protease HtpX, putative	pth:PTH_1960	G4NJU1			XP_003721214.1		100	29.41	45.04	45.04
gene8138	Cluster1	0.718337	1.10298	0.641188	2.29994	1.19061	0.4408	357007	GO:0016616, GO:0048037, GO:0003824, GO:0005488, GO:0008152	oxidoreductase activity, acting on the CH-OH group of donors, D or DP as acceptor, cofactor binding, catalytic activity, binding, metabolic process	IPR006140, IPR016040	D-isomer specific 2-hydroxyacid dehydrogenase, D-binding, D(P)-binding	2-Hacid_dh_C, D(P)-binding Rossmann-fold domains
gene3235	Cluster1	-0.758287	2.44381	1.70973	1.36201	1.18932	1.41689	75538		unknown_gene		unknown_gene			unknown_gene			unknown_gene		F4NX16		unknown_gene	XP_006676979.1		100		76.19	76.19
NOV_003555	Cluster1	0.942231	2.01715	0.762437	1.02516	1.18674	0.238877							P19706, N9CWS2	Myosin heavy chain IB (Myosin heavy chain IL), Uncharacterized protein	MIB MIL, F946_02365	IPR001609;IPR010926;IPR027417;IPR001452;, IPR029021;IPR026893;				PF08264;PF00133;PF13603;PF09334;, PF06985;					34.3, 41.2				,	DOMAIN 9 677 Myosin motor.; DOMAIN 715 900 TH1. {ECO:0000255|PROSITE-ProRule:PRU01093}.; DOMAIN 1090 1147 SH3. {ECO:0000255|PROSITE-ProRule:PRU00192}.,
gene2471	Cluster1	0.918103	1.06798	0.743776	2.00863	1.18462	0.239492	353986		unknown_gene		unknown_gene			unknown_gene			unknown_gene				unknown_gene			100
gene9013	Cluster1	0.806761	0.375804	1.03563	2.49338	1.17789	0.632961	341310			IPR011701, IPR016196	Major facilitator superfamily MFS-1, MFS general substrate transporter	MFS_1, MFS general substrate transporter	Q8LG53	UNC93-like protein 2	At1g18010 T10F20.2	IPR010291, IPR020846	Ion channel regulatory protein, UNC-93, Major facilitator superfamily domain	ath:AT1G18010, ath:AT1G18000	L2FRF5	IPR011701, IPR020846	Major facilitator superfamily, Major facilitator superfamily domain	XP_007282647.1		99.26	25.26	74.74	74.74
gene5849	Cluster1	0.772715	1.1268	0.500001	2.30663	1.17654	0.475087	257749	GO:0016491, GO:0003824, GO:0005488, GO:0008152	oxidoreductase activity, catalytic activity, binding, metabolic process	IPR000683, IPR016040	Oxidoreductase, N-terminal, D(P)-binding	GFO_IDH_MocA, D(P)-binding Rossmann-fold domains	P04387	Galactose/lactose metabolism regulatory protein GAL80	GAL80 YML051W YM9827.01 YM9958.12	IPR000683, IPR016040	Oxidoreductase, N-terminal, D(P)-binding domain	sce:YML051W	A0A084Q8J0	IPR000683, IPR016040	Oxidoreductase, N-terminal, D(P)-binding domain	KFA60275.1	XM_001227449.1	99.46	31.03	48.53	48.53	71.84
gene7400	Cluster1	1.0499	0.707141	0.863628	2.07744	1.17453	0.286475	277548	GO:0016787	hydrolase activity	IPR002821, IPR008040, IPR010318	Hydantoinase/oxoprolinase, Hydantoinaseoxoprolinase, N-terminal, Protein of unknown function DUF917	Hydantoinase_A, Hydant_A_N, DUF917	Q10093	Uncharacterized protein C11D3.14c	SPAC11D3.14c	IPR002821, IPR003692, IPR008040	Hydantoinase/oxoprolinase, Hydantoinase B/oxoprolinase, Hydantoinaseoxoprolinase, N-terminal	spo:SPAC11D3.14c	A0A010RMT5	IPR002821, IPR008040, IPR010318, IPR024071, IPR027479	Hydantoinase/oxoprolinase, Hydantoinaseoxoprolinase, N-terminal, Protein of unknown function DUF917, Protein of unknown function DUF917, C-terminal, Protein of unknown function DUF917, N-terminal	XP_007594586.1		100	26.04	67.9	67.9
gene10611	Cluster1	0.551636	0.40147	0.728457	2.96677	1.16208	1.09903	50206	GO:0004553, GO:0005975	hydrolase activity, hydrolyzing O-glycosyl compounds, carbohydrate metabolic process	IPR006710	Glycoside hydrolase, family 43	Glyco_hydro_43	A7LXT8	Non-reducing end alpha-L-arabinofuranosidase BoGH43A (EC 3.2.1.55) (Glycosyl hydrolase family protein 43A) (BoGH43A)	BACOVA_02654	IPR006710, IPR013320, IPR023296	Glycoside hydrolase, family 43, Concanavalin A-like lectin/glucanase domain, Glycosyl hydrolase, five-bladed beta-propellor domain		W3WVI3	IPR006710, IPR013320, IPR023296	Glycoside hydrolase, family 43, Concanavalin A-like lectin/glucanase domain, Glycosyl hydrolase, five-bladed beta-propellor domain	XP_007836717.1		100	40.24	59.76	59.76
gene6823	Cluster1	1.14585	0.638604	0.771268	2.03115	1.14672	0.295342	259533			IPR011701, IPR016196	Major facilitator superfamily MFS-1, MFS general substrate transporter	MFS_1, MFS general substrate transporter	O74923	Uncharacterized transporter C757.13	SPCC757.13	IPR011701, IPR020846	Major facilitator superfamily, Major facilitator superfamily domain	spo:SPCC757.13	W7MWP8	IPR011701, IPR020846	Major facilitator superfamily, Major facilitator superfamily domain	EWG52090.1		100	38.17	69.29	69.29
gene626	Cluster1	1.05513	1.47316	2.01007	0	1.13459	0.543675	326036		unknown_gene		unknown_gene			unknown_gene			unknown_gene				unknown_gene			99.4
gene8663	Cluster1	0.800599	0.978585	0.453968	2.29305	1.13155	0.485281	331799	GO:0016884, GO:0004040	carbon-nitrogen ligase activity, with glutamine as amido-N-donor, amidase activity	IPR000120, IPR015830	Amidase signature enzyme, Amidase, fungi type	Amidase, Amidase, fungal type, AMIDASES, Amidase signature (AS) enzymes	O59805	Putative amidase C550.07 (EC 3.5.1.4)	SPCC550.07	IPR000120, IPR020556, IPR023631	Amidase, Amidase, conserved site, Amidase signature domain	spo:SPCC550.07	G9MZI6	IPR000120, IPR023631	Amidase, Amidase signature domain	EHK20042.1	XM_013423568.1	100	46.7	61.43	61.43	71.92
gene2615	Cluster1	-0.275385	0.645698	2.37177	1.77941	1.13037	1.04335	354004	GO:0004672, GO:0005524, GO:0006468, GO:0004674	protein kinase activity, ATP binding, protein amino acid phosphorylation, protein serine/threonine kinase activity	IPR000719, IPR017442, IPR002290, IPR008271, IPR011009	Protein kinase, core, Serine/threonine protein kinase-related, Serine/threonine protein kinase, Serine/threonine protein kinase, active site, Protein kinase-like	Q7SHL9_NEUCR_Q7SHL9;, Pkinase, no description, PROTEIN_KISE_DOM, PROTEIN_KISE_ST, Protein kinase-like (PK-like)
gene8282	Cluster1	-0.275385	0.645698	2.37177	1.77941	1.13037	1.04335	108650	GO:0004672, GO:0005524, GO:0006468, GO:0004674	protein kinase activity, ATP binding, protein amino acid phosphorylation, protein serine/threonine kinase activity	IPR000719, IPR017442, IPR002290, IPR008271, IPR011009	Protein kinase, core, Serine/threonine protein kinase-related, Serine/threonine protein kinase, Serine/threonine protein kinase, active site, Protein kinase-like	Q7SHL9_NEUCR_Q7SHL9;, Pkinase, no description, PROTEIN_KISE_DOM, PROTEIN_KISE_ST, Protein kinase-like (PK-like)
gene1201	Cluster1	1.51045	0.575167	2.28759	0.0991421	1.11809	0.713673	66203		unknown_gene		unknown_gene			unknown_gene			unknown_gene				unknown_gene			95.83
gene8117	Cluster1	0.616657	1.31344	0.494982	2.01745	1.11063	0.371621	48889	GO:0005215, GO:0006810, GO:0016021	transporter activity, transport, integral to membrane	IPR011701, IPR007114, IPR016196	Major facilitator superfamily MFS-1, Major facilitator superfamily, MFS general substrate transporter	MFS_1, MFS, MFS general substrate transporter	O43000	Pantothenate transporter liz1	liz1 SPBC2G2.01c SPBC4B4.13c	IPR011701, IPR020846	Major facilitator superfamily, Major facilitator superfamily domain	spo:SPBC2G2.01c	F7W0Y9	IPR011701, IPR020846	Major facilitator superfamily, Major facilitator superfamily domain	XP_003350385.1	XM_003006932.1	99.73	33.33	71.24	71.24	74.95
gene4683	Cluster1	1.40565	0.435703	2.19364	0.405024	1.11	0.553338	65827	GO:0004650, GO:0005975	polygalacturonase activity, carbohydrate metabolic process	IPR000743, IPR006626, IPR011050	Glycoside hydrolase, family 28, Parallel beta-helix repeat, Pectin lyase fold/virulence factor	Glyco_hydro_28, no description, POLYGALACTUROSE, Pectin lyase-like	Q5ATQ3	Endopolygalacturonase AN8327 (EC 3.2.1.15) (Pectinase AN8327) (Polygalacturonase AN8327)	AN8327	IPR000743, IPR006626, IPR011050, IPR012334	Glycoside hydrolase, family 28, Parallel beta-helix repeat, Pectin lyase fold/virulence factor, Pectin lyase fold	ani:AN8327.2	A7EFT6	IPR000743, IPR006626, IPR011050, IPR012334	Glycoside hydrolase, family 28, Parallel beta-helix repeat, Pectin lyase fold/virulence factor, Pectin lyase fold	XP_001594370.1		94.8	62.11	64.26	64.26
gene350	Cluster1	0.742847	1.29145	2.21785	0.169547	1.10542	0.569857	66510						P36607	D repair protein rad8 (EC 3.6.4.-) (D repair protein RAD5 homolog)	rad8 SPAC13G6.01c SPAC5H10.14c	IPR000330, IPR001650, IPR001841, IPR013083, IPR014001, IPR014905, IPR027417	SNF2-related, N-terminal domain, Helicase, C-terminal, Zinc finger, RING-type, Zinc finger, RING/FYVE/PHD-type, Helicase superfamily 1/2, ATP-binding domain, HIRAN domain, P-loop containing nucleoside triphosphate hydrolase	spo:SPAC13G6.01c	U1HMY4	IPR000330, IPR001650, IPR014001, IPR017907, IPR027417	SNF2-related, N-terminal domain, Helicase, C-terminal, Helicase superfamily 1/2, ATP-binding domain, Zinc finger, RING-type, conserved site, P-loop containing nucleoside triphosphate hydrolase	XP_007802668.1		100	47.17	40.93	40.93
NOV_003477	Cluster1	0.604696	0.894173	0.833483	2.04634	1.09467	0.313544							P9WN15	Uncharacterized glycosyl hydrolase Rv2006 (EC 3.2.1.-)	Rv2006 MTCY39.11c	IPR008928;IPR012341;IPR011013;IPR005194;IPR005195;IPR005196;IPR023214;IPR006379;IPR003337;				PF00063;PF06017;PF00018;, PF13350;					34.7				trehalose biosynthetic process [GO:0005992]
gene4793	Cluster1	0.186982	2.15943	1.39883	0.577128	1.08059	0.579293	355408		unknown_gene		unknown_gene			unknown_gene			unknown_gene		A0A010RRB1		unknown_gene	XP_007601511.1		100		70.59	70.59
NOV_006382	Cluster1	2.23311	0.505075	0.51818	1.02696	1.07083	0.494578								unknown_gene	unknown_gene	unknown_gene				PF07517;PF01043;PF07516;, PF00149;									unknown_gene
gene9911	Cluster1	0.444754	0.937098	0.748543	2.13831	1.06718	0.413298	264662	GO:0004091	carboxylesterase activity	IPR002018	Carboxylesterase, type B	COesterase, CARBOXYLESTERASE_B_1, CARBOXYLESTERASE_B_2	P37967	Para-nitrobenzyl esterase (EC 3.1.1.-) (Intracellular esterase B) (PNB carboxy-esterase) (PNBCE)	pnbA estB BSU34390	IPR000997, IPR002018, IPR019819, IPR019826, IPR029058	Cholinesterase, Carboxylesterase, type B, Carboxylesterase type B, conserved site, Carboxylesterase type B, active site, Alpha/Beta hydrolase fold	bsu:BSU34390	R1E8C5	IPR002018, IPR019819, IPR019826, IPR029058	Carboxylesterase, type B, Carboxylesterase type B, conserved site, Carboxylesterase type B, active site, Alpha/Beta hydrolase fold	XP_007588828.1		100	30.15	59.58	59.58
gene3412	Cluster1	0.651615	1.0197	0.0915031	2.49406	1.06422	0.790714	354904						Q54S10	Mitochondrial substrate carrier family protein U	mcfU DDB_G0282727	IPR018108, IPR023395	Mitochondrial substrate/solute carrier, Mitochondrial carrier domain	ddi:DDB_G0282727	R8BWM9	IPR027417	P-loop containing nucleoside triphosphate hydrolase	XP_007911473.1		100	36.21	38.83	38.83
gene882	Cluster1	0.754769	0.594918	0.821562	2.07187	1.06078	0.34755	246811	GO:0003934, GO:0005737, GO:0019438	GTP cyclohydrolase I activity, cytoplasm, aromatic compound biosynthetic process	IPR001474	GTP cyclohydrolase I	GCH1_NEUCR_P51599;, GTP_cyclohydroI, folE: GTP cyclohydrolase I, GTP_CYCLOHYDROL_1_1, GTP_CYCLOHYDROL_1_2	P51599	GTP cyclohydrolase 1 (EC 3.5.4.16) (GTP cyclohydrolase I) (GTP-CH-I)	gch-1 104H10.80 NCU07774	IPR001474, IPR018234, IPR020602	GTP cyclohydrolase I, GTP cyclohydrolase I, conserved site, GTP cyclohydrolase I domain	ncr:NCU07774	G4UFG2	IPR001474, IPR018234, IPR020602	GTP cyclohydrolase I, GTP cyclohydrolase I, conserved site, GTP cyclohydrolase I domain	P51599.2GCH1_NEUCR	XM_009654755.1	88.89	67.08	67.08	67.08	85.21
NOV_012777	Cluster1	2.86242	0.146376	0.957033	0.259616	1.05636	1.18365							P18859	ATP synthase-coupling factor 6, mitochondrial (ATPase subunit F6)	ATP5J ATP5A ATPM	IPR008387;IPR016349;				unknown_gene					32.3				ATP biosynthetic process [GO:0006754]; mitochondrial ATP synthesis coupled proton transport [GO:0042776]; substantia nigra development [GO:0021762]
gene993	Cluster1	0.633757	0.787983	0.493918	2.29785	1.05338	0.527059	245007	GO:0008152, GO:0016491, GO:0003824, GO:0005488, GO:0016404	metabolic process, oxidoreductase activity, catalytic activity, binding, 15-hydroxyprostaglandin dehydrogenase (D+) activity	IPR002198, IPR002347, IPR016040	Short-chain dehydrogenase/reductase SDR, Glucose/ribitol dehydrogenase, D(P)-binding	SDRFAMILY, GDHRDH, adh_short, ADH_SHORT, D(P)-binding Rossmann-fold domains	Q8KWT4	Bacilysin biosynthesis oxidoreductase BacC (EC 1.-.-.-)	bacC	IPR002198, IPR002347, IPR016040, IPR020904	Short-chain dehydrogenase/reductase SDR, Glucose/ribitol dehydrogenase, D(P)-binding domain, Short-chain dehydrogenase/reductase, conserved site		A0A066X3I4	IPR002198, IPR002347, IPR016040, IPR018247, IPR020904	Short-chain dehydrogenase/reductase SDR, Glucose/ribitol dehydrogenase, D(P)-binding domain, EF-Hand 1, calcium-binding site, Short-chain dehydrogenase/reductase, conserved site	KDN60306.1	XM_007794750.1	99.67	29.11	68.11	68.11	76.47
NOV_011775	Cluster1	0.808451	0.59417	0.737902	2.07112	1.05291	0.351546							Q8BFX3	BTB/POZ domain-containing protein KCTD3	Kctd3	IPR000210;IPR011333;IPR003131;IPR015943;IPR001680;IPR019775;IPR017986;				PF01064;PF00069;, PF03403;					33.9				protein homooligomerization [GO:0051260]	DOMAIN 18 87 BTB. {ECO:0000255|PROSITE-ProRule:PRU00037}.
gene6648	Cluster1	0.646739	2.37764	0.69465	0.468048	1.04677	0.597536	330200		unknown_gene		unknown_gene			unknown_gene			unknown_gene				unknown_gene			100
gene8408	Cluster1	-0.347924	0.745628	0.989497	2.79598	1.0458	1.27472	75088						Q0VC33	Tetraspanin-11 (Tspan-11)	TSPAN11	IPR000301, IPR008952, IPR018499	Tetraspanin, Tetraspanin, EC2 domain, Tetraspanin/Peripherin	bta:616660						100	37.7
gene1063	Cluster1	1.39357	2.0299	-0.225518	0.976416	1.04359	0.67761	283818	GO:0003824, GO:0005488, GO:0008152	catalytic activity, binding, metabolic process	IPR013149, IPR013154, IPR011032, IPR016040	Alcohol dehydrogenase, zinc-binding, Alcohol dehydrogenase GroES-like, GroES-like, D(P)-binding	ADH_zinc_N, ADH_N, GroES-like, D(P)-binding Rossmann-fold domains	Q9Y7D0	Enoyl reductase LovC (EC 1.-.-.-)	lovC	IPR002085, IPR011032, IPR013149, IPR013154, IPR016040	Alcohol dehydrogenase superfamily, zinc-type, GroES-like, Alcohol dehydrogenase, C-terminal, Alcohol dehydrogenase, N-terminal, D(P)-binding domain		A1CLP5	IPR002085, IPR011032, IPR013149, IPR016040	Alcohol dehydrogenase superfamily, zinc-type, GroES-like, Alcohol dehydrogenase, C-terminal, D(P)-binding domain	XP_001270450.1		100	40.48	73.58	73.58
gene7927	Cluster1	2.08193	2.18669	0.813116	-0.921536	1.04005	1.5749	331439		unknown_gene		unknown_gene			unknown_gene			unknown_gene				unknown_gene			100
[truncated: 687 more rows]

## Sheet: Table S3-2
gene_id	groups	X6_EP155mix	X7_p29mix	X8_p29stopmix	X9_dcl2mix	proteinId.x	gotrm	goName	CPiprId	CP_iprDesc	CP_domainDesc	UP_proteinId	Protein.names.x	Gene.names.x	UP_iprID	UP_iprDesc	UP_KEGG	TrEMBL_proteinId	TrEM_iprID	TrEM_iprDesc	NR_proteinId	RefR_proteinId	CP_BLAST_score	UP_BLAST_score	NR_BLAST_score	TrEMBL_BLAST_score	RefR_BLAST_score	BLAST_score	proteinId.y	Entry.name	Status	Protein.names.y	Gene.names.y	Organism	Length	Taxonomic.lineage..GENUS.	Taxonomic.lineage.IDs..GENUS.	Taxonomic.lineage.IDs..SPECIES.	Taxonomic.lineage..SPECIES.	Taxonomic.lineage..KINGDOM.	Gene.ontology..biological.process.	Cross.reference..Pfam.	Cross.reference..InterPro.	Domain..FT.
[truncated: 4,521 more rows]
